# Supplementary material for: Biocatalytic asymmetric radical alkene hydration
Source: Research Square preprint supplement (doi:10.21203/rs.3.rs-8642613/v1), 2026-01-28
Supplement: Supplementary file 1 [file be0d564cf1f422a06975b612.pdf]

# **Supporting Information**

## **Biocatalytic asymmetric radical alkene hydration**

Dongping Chen<sup>1,2</sup>, Xiang Zhang<sup>\*1,2,3</sup>, and Thomas R. Ward<sup>\*1,2</sup>

<sup>1</sup> Department of Chemistry, University of Basel, BPR 1096, Mattenstrasse 22, 4002 Basel, Switzerland.

<sup>2</sup> National Center of Competence in Research “Molecular Systems Engineering”, 4058 Basel, Switzerland.

<sup>3</sup> Current address: Frontiers Science Center for Transformative Molecules, Shanghai Jiao Tong University, Shanghai, China.

Email: xiang.zhang@unibas.ch, thomas.ward@unibas.ch

# Table of Contents

|                                                                                                  |            |
|--------------------------------------------------------------------------------------------------|------------|
| <b>1. General aspects .....</b>                                                                  | <b>3</b>   |
| 1.1 Materials and methods .....                                                                  | 3          |
| 1.2 Instrumentation .....                                                                        | 4          |
| <b>2. Investigation of the biocatalytic asymmetric radical alkene hydration.....</b>             | <b>5</b>   |
| 2.1 Optimization of the biocatalytic asymmetric radical alkene hydration .....                   | 5          |
| 2.2 Determination of the absolute configuration of tetralol <b>2</b> .....                       | 14         |
| 2.3 Summary of the substrate scope for the P450 <sub>BM3</sub> -catalyzed alkene hydration ..... | 18         |
| <b>3. Mechanistic studies.....</b>                                                               | <b>19</b>  |
| 3.1 Deuterium-labeling experiments.....                                                          | 19         |
| 3.2 Radical-clock experiment .....                                                               | 23         |
| 3.3 Determination of the oxygen source by <sup>18</sup> O-labeling experiments.....              | 25         |
| 3.4 Biocatalytic reaction with epoxide.....                                                      | 32         |
| 3.5 Time-course monitoring experiments .....                                                     | 34         |
| 3.6 Detection and characterization of the diol <b>34</b> .....                                   | 35         |
| 3.7 Investigation of the formation of diol <b>34</b> .....                                       | 43         |
| 3.8 Detection of the hydroperoxide intermediate <b>35</b> .....                                  | 44         |
| 3.9 Biocatalytic reaction of hydroperoxide <b>35</b> .....                                       | 47         |
| <b>4. Genetic Information .....</b>                                                              | <b>53</b>  |
| <b>5. General catalytic procedures .....</b>                                                     | <b>56</b>  |
| <b>6. Synthesis and characterization of substrates and products.....</b>                         | <b>57</b>  |
| 6.1 Synthesis and characterization of alkene substrates .....                                    | 57         |
| 6.2 Synthesis and characterization of products.....                                              | 65         |
| <b>7. Supporting Figures .....</b>                                                               | <b>75</b>  |
| 7.1 Calibration Curves .....                                                                     | 75         |
| 7.2 SFC traces .....                                                                             | 79         |
| <b>8. NMR spectra .....</b>                                                                      | <b>107</b> |
| <b>9. References.....</b>                                                                        | <b>136</b> |

## 1. General aspects

### 1.1 Materials and methods

All commercially available chemicals and solvents were purchased from Sigma-Aldrich, ABCR, TCI Europe, Acros Organics, Alfa Aesar, Fluka, Fluorochem, Merck or Ukrorgsyntez Ltd. and used without further purification. Dry solvents were purchased from Acros Organics and used without further purification. Flash chromatography was carried out on silica gel (Silicycle SiliaFlash P60(230-400 mesh)).

All catalytic experiments were performed in 2.0 mL glass vials in air using non-degassed solvents unless otherwise stated.

The water used for all biological and catalytic experiments was purified with a Milli-Q Advantage system. All enzymes used for PCRs and cloning were purchased from New England Biolabs (NEB). 1000x Trace Element Solution: 0.5 g L<sup>-1</sup> CaCl<sub>2</sub>·2H<sub>2</sub>O, 0.18 g L<sup>-1</sup> ZnSO<sub>4</sub>·7H<sub>2</sub>O, 0.1 g L<sup>-1</sup> MnSO<sub>4</sub>·H<sub>2</sub>O, 20.1 g L<sup>-1</sup> Na<sub>2</sub>EDTA, 16.7 g L<sup>-1</sup> FeCl<sub>3</sub>·6H<sub>2</sub>O, 0.16 g L<sup>-1</sup> CuSO<sub>4</sub>·5H<sub>2</sub>O dissolved in Milli-Q H<sub>2</sub>O.

Primers for mutagenesis were ordered from Swiss Microsynth company.

## 1.2 Instrumentation

NMR spectra were recorded on a Bruker 500 MHz or 600 MHz spectrometer. The spectra were referenced using the undeuterated residual solvent peak (for  $^1\text{H}$  NMR) and deuterated solvents (for  $^{13}\text{C}$  NMR) as internal standard: chloroform ( $\delta\text{H} = 7.26$  ppm) and  $\text{CDCl}_3$  ( $\delta\text{C} = 77.16$  ppm), dichloromethane ( $\delta\text{H} = 5.32$  ppm) and  $\text{CD}_2\text{Cl}_2$  ( $\delta\text{C} = 53.84$  ppm), dimethyl sulfoxide ( $\delta\text{H} = 2.50$  ppm) and  $\text{DMSO-d}_6$  ( $\delta\text{C} = 39.52$  ppm), acetonitrile ( $\delta\text{H} = 1.94$  ppm) and  $\text{CD}_3\text{CN}$  ( $\delta\text{C} = 118.26$  ppm), methanol ( $\delta\text{H} = 3.31$  ppm) and  $\text{MeOD-d}_4$  ( $\delta\text{C} = 49.00$  ppm). The following abbreviations are used to designate multiplicities: s = singlet, d = doublet, t = triplet, q = quartet, m = multiplet, br = broad.

Electron-Spray Ionization Mass Spectra (ESI-MS) were recorded on a Bruker FTMS 4.7T bioAPEX II. High-resolution mass spectra (HRMS) were measured on a Bruker maXis 4G QTOF ESI mass spectrometer.

The catalytic experiments were analyzed using either supercritical fluid chromatography (SFC) on a Waters Acquity UPC<sup>2</sup> or gas chromatography (GC) on an Agilent GC 6890N. In both cases, 1,3,5-trimethoxybenzene was used as internal standard.

An EvoluChem 18 W blue LED was used for photochemical reaction.

An Agilent GC 7890B was used for the GC-MS analysis.

Sonication was performed using Fisher Scientific FB705 instrument, with 6.3 mm microtip.

Polymerase chain reactions (PCR) were carried out using BioRad C1000 thermal cycler.



## 2. Investigation of the biocatalytic asymmetric radical alkene hydration

### 2.1 Optimization of the biocatalytic asymmetric radical alkene hydration

**Supplementary Table 1. Directed evolution of P450<sub>BM3</sub> for asymmetric radical hydration of alkene 1**

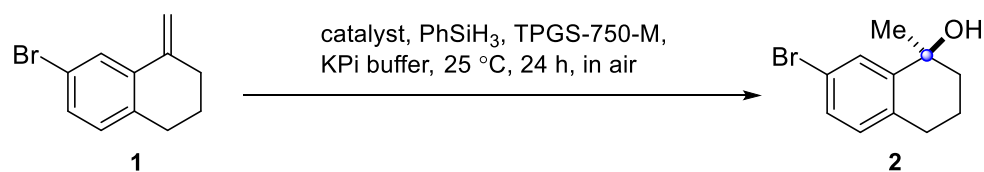

| Entry <sup>a</sup> | catalyst                             | Yield (%) | e.e. (%)   |
|--------------------|--------------------------------------|-----------|------------|
| 1 <sup>b</sup>     | haemin chloride                      | 20±1      | <i>rac</i> |
| 2                  | P450 <sub>BM3</sub> _WT              | 24±1      | 16±1       |
| 3                  | P450 <sub>BM3</sub> _T268G           | 19±1      | −26±2      |
| 4                  | P450 <sub>BM3</sub> _F87T-T268G      | 26±1      | 88±0       |
| 5                  | P450 <sub>BM3</sub> _A74Q-F87T-T268G | 23±0      | 93±2       |

<sup>a</sup>Unless otherwise stated, the standard conditions are: alkene **1** (1.0 mM), enzyme (1 μM, 0.1 mol % catalytic loading), KPi buffer (50 mM, pH 7.0), PhSiH<sub>3</sub> (2 μL of 50 % v/v in DMSO, 20 equiv. compared with alkene **1**), TPGS-750-M (40 μL, from 2 wt. % in H<sub>2</sub>O stock solution), V<sub>tot</sub> 400 μL, 25 °C in air for 24 h; workup by adding aq. Na<sub>2</sub>S<sub>2</sub>O<sub>4</sub> (10 μL, from 0.5 M in H<sub>2</sub>O stock solution). Yields and e.e. were determined by SFC using 1,3,5-trimethoxybenzene as internal standard. Reactions were performed in duplicate, and the standard deviations are listed.

<sup>b</sup>haemin chloride (50 μM, 5.0 mol % catalytic loading).

**Supplementary Table 2. Influence of mutations at P450<sub>BM3</sub>\_C400 on the biocatalytic asymmetric radical alkene hydration**

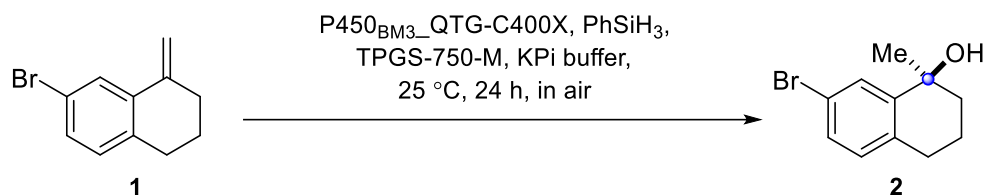

| Entry <sup>a</sup> | Variants                              | Yield (%) | e.e. (%) |
|--------------------|---------------------------------------|-----------|----------|
| 1                  | P450 <sub>BM3</sub> _QTG <sup>b</sup> | 23±0      | 93±2     |
| 2                  | P450 <sub>BM3</sub> _QTG-C400M        | 5±1       | -6±1     |
| 3                  | P450 <sub>BM3</sub> _QTG-C400S        | 6±2       | 23±3     |
| 4 <sup>c</sup>     | P450 <sub>BM3</sub> _QTG-C400A        | 5±1       | 11±1     |
| 5                  | P450 <sub>BM3</sub> _QTG-C400H        | 4±1       | 12±2     |

<sup>a</sup>Unless otherwise stated, the standard conditions are: alkene **1** (1.0 mM), P450<sub>BM3</sub> variant (1 μM, 0.1 mol % catalytic loading), KPi buffer (50 mM, pH 7.0), PhSiH<sub>3</sub> (2 μL of 50 % v/v in DMSO, 20 equiv. compared with alkene **1**), TPGS-750-M (40 μL, from 2 wt. % in H<sub>2</sub>O stock solution), V<sub>tot</sub> 400 μL, 25 °C in air for 24 h; workup by adding aq. Na<sub>2</sub>S<sub>2</sub>O<sub>4</sub> (10 μL, from 0.5 M in H<sub>2</sub>O stock solution). Yield and e.e. were determined by SFC using 1,3,5-trimethoxybenzene as internal standard. Reactions were performed in duplicate, and the standard deviations are listed. <sup>b</sup>P450<sub>BM3</sub>\_QTG is abbreviation for P450<sub>BM3</sub>\_A74Q-F87T-T268G. <sup>c</sup>P450<sub>BM3</sub>\_QTG-C400A (0.5 μM, 0.05 mol % catalytic loading).

**Supplementary Table 3. Influence of the hydride source on the P450<sub>BM3</sub>\_QTG catalyzed asymmetric radical alkene hydration**

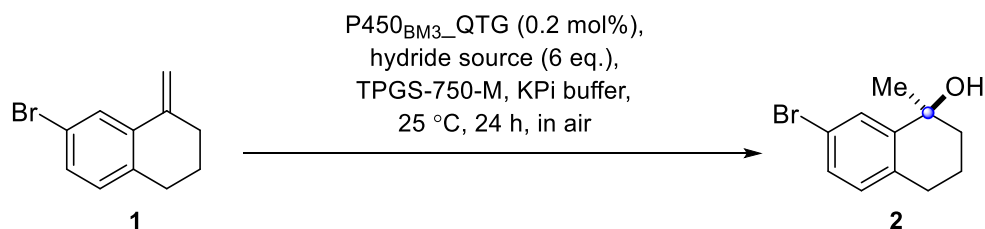

| Entry <sup>a</sup> | Hydride source                | Yield (%) | e.e. (%) |
|--------------------|-------------------------------|-----------|----------|
| 1                  | PhSiH <sub>3</sub>            | 9±1       | 91±2     |
| 2                  | PhMeSiH <sub>2</sub>          | 59±1      | 92±1     |
| 3                  | PhMe <sub>2</sub> SiH         | 1±1       | -        |
| 4                  | 1,1,3,3-Tetramethyldisiloxane | 4±0       | -        |
| 5                  | Et <sub>3</sub> SiH           | 0         | -        |
| 6                  | NaBH <sub>4</sub>             | 0         | -        |

<sup>a</sup>Unless otherwise stated, the standard conditions are: alkene **1** (1.0 mM), P450<sub>BM3</sub>\_QTG (2 μM, 0.2 mol % catalytic loading), KPi buffer (50 mM, pH 7.0), hydride source (6.0 mM, 6 equiv. compared with alkene **1**), TPGS-750-M (40 μL, from 4 wt. % in H<sub>2</sub>O stock solution), V<sub>tot</sub> 400 μL, 25 °C in air for 24 h; workup by adding aq. Na<sub>2</sub>S<sub>2</sub>O<sub>4</sub> (10 μL, from 0.5 M in H<sub>2</sub>O stock solution). Yield and e.e. were determined by SFC using 1,3,5-trimethoxybenzene as internal standard. Reactions were performed in duplicate, and the standard deviations are listed.

**Supplementary Table 4. Influence of the PhSiMeH<sub>2</sub> concentration on the P450<sub>BM3</sub>\_QTG catalyzed asymmetric radical alkene hydration**

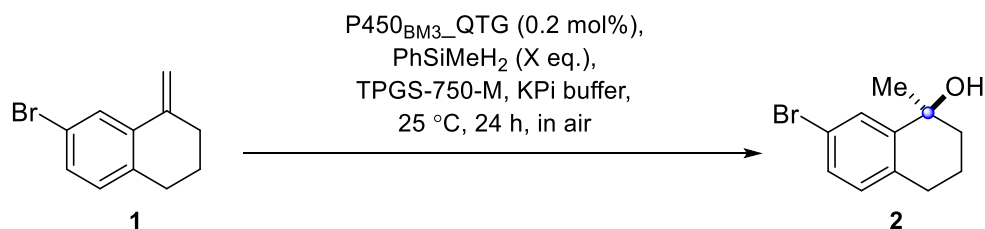

| Entry <sup>a</sup> | PhSiMeH <sub>2</sub> (eq.) | Yield (%) | e.e. (%) |
|--------------------|----------------------------|-----------|----------|
| 1                  | 2 eq.                      | 26±1      | 92±0     |
| 2                  | 3 eq.                      | 40±2      | 91±1     |
| 3                  | 4 eq.                      | 49±1      | 91±1     |
| 4                  | 5 eq.                      | 53±0      | 91±1     |
| 5                  | 6 eq.                      | 61±0      | 92±1     |
| 6                  | 8 eq.                      | 66±0      | 90±1     |
| 7                  | 10 eq.                     | 65±2      | 89±1     |

<sup>a</sup>Unless otherwise stated, the standard conditions are: alkene **1** (1.0 mM), P450<sub>BM3</sub>\_QTG (2 μM, 0.2 mol % catalytic loading), KPi buffer (50 mM, pH 7.0), PhSiMeH<sub>2</sub> (equivalents indicated in the table), TPGS-750-M (40 μL, from 4 wt. % in H<sub>2</sub>O stock solution), V<sub>tot</sub> 400 μL, 25 °C in air for 24 h; workup by adding aq. Na<sub>2</sub>S<sub>2</sub>O<sub>4</sub> (10 μL, from 0.5 M in H<sub>2</sub>O stock solution). Yield and e.e. were determined by SFC using 1,3,5-trimethoxybenzene as internal standard. Reactions were performed in duplicate, and the standard deviations are listed.

**Supplementary Table 5. Influence of non-ionic surfactant additives on the biocatalytic asymmetric radical alkene hydration**

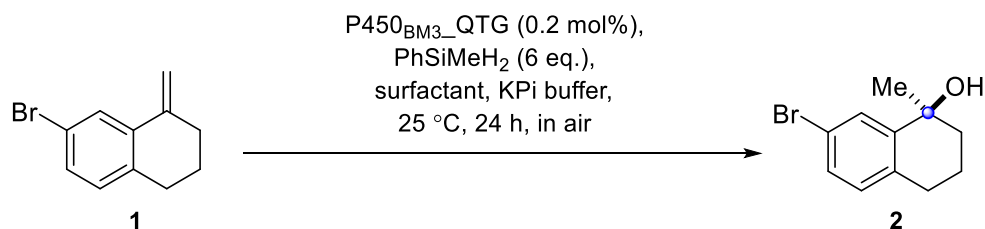

| Entry <sup>a</sup> | Non-ionic surfactant | Yield (%) | e.e. (%) |
|--------------------|----------------------|-----------|----------|
| 1                  | TPGS-750-M           | 59±1      | 92±1     |
| 2                  | TPGS-1000-M          | 52±3      | 90±0     |
| 3                  | Milli-Q water        | 33±1      | 88±0     |
| 4                  | TWEEN 80             | 35±1      | 82±2     |
| 5                  | Triton X-100         | 56±1      | 88±1     |
| 6                  | SPGS-550M            | 43±6      | 88±1     |

<sup>a</sup>Unless otherwise stated, the standard conditions are: alkene **1** (1.0 mM), P450<sub>BM3</sub>-QTG (2 μM, 0.2 mol % catalytic loading), KPi buffer (50 mM, pH 7.0), PhSiMeH<sub>2</sub> (2 μL of 25 % v/v in DMSO, 6 equiv. compared with alkene **1**), surfactant (40 μL, from 2 wt. % in H<sub>2</sub>O stock solution), V<sub>tot</sub> 400 μL, 25 °C in air for 24 h; workup by adding aq. Na<sub>2</sub>S<sub>2</sub>O<sub>4</sub> (10 μL, from 0.5 M in H<sub>2</sub>O stock solution). Yield and e.e. were determined by SFC using 1,3,5-trimethoxybenzene as internal standard. Reactions were performed in duplicate, and the standard deviations are listed.

**Supplementary Table 6. Influence of TPGS-750-M surfactant content on the biocatalytic asymmetric radical alkene hydration**

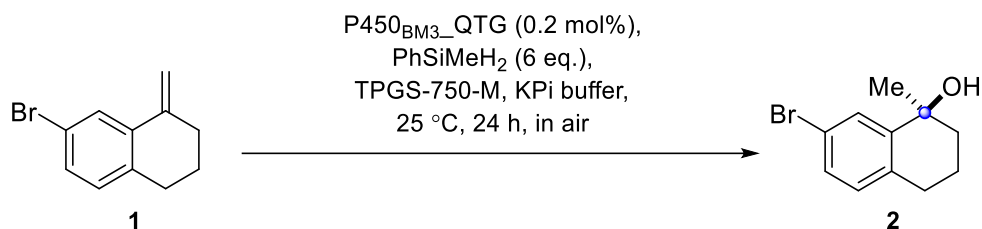

| Entry <sup>a</sup> | Final weight percent<br>of TPGS-750-M (%) | Yield (%) | e.e. (%) |
|--------------------|-------------------------------------------|-----------|----------|
| 1                  | 0.2                                       | 52±1      | 91±1     |
| 2                  | 0.4                                       | 62±2      | 92±1     |
| 3                  | 0.6                                       | 57±1      | 91±0     |
| 4                  | 0.8                                       | 53±0      | 90±0     |
| 5                  | 1.0                                       | 48±1      | 89±1     |

<sup>a</sup>Unless otherwise stated, the standard conditions are: alkene **1** (1.0 mM), P450<sub>BM3</sub>-QTG (2 μM, 0.2 mol % catalytic loading), KPi buffer (50 mM, pH 7.0), PhSiMeH<sub>2</sub> (2 μL of 25 % v/v in DMSO, 6 equiv. compared with alkene **1**), TPGS-750-M (final weight percent indicated in the table), V<sub>tot</sub> 400 μL, 25 °C in air for 24 h; workup by adding aq. Na<sub>2</sub>S<sub>2</sub>O<sub>4</sub> (10 μL, from 0.5 M in H<sub>2</sub>O stock solution). Yield and e.e. were determined by SFC using 1,3,5-trimethoxybenzene as internal standard. Reactions were performed in duplicate, and the standard deviations are listed.

**Supplementary Table 7. Influence of biocatalyst loading on the biocatalytic asymmetric radical hydration of alkene 1**

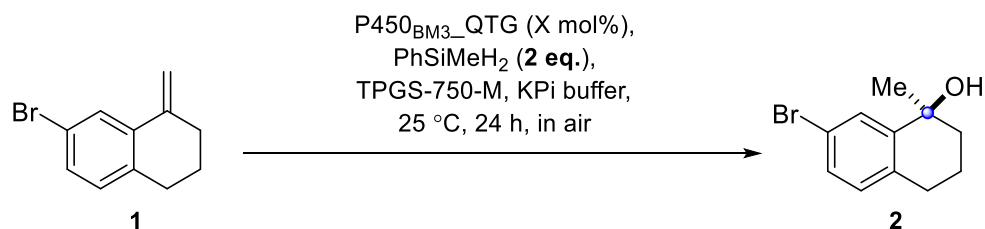

| Entry <sup>a</sup> | Biocatalyst loading (mol%) | Yield (%) | e.e. (%) |
|--------------------|----------------------------|-----------|----------|
| 1                  | 0.1                        | 28±1      | 85±2     |
| 2                  | 0.2                        | 31±1      | 90±1     |
| 3                  | 0.4                        | 35±1      | 93±2     |
| 4                  | 0.6                        | 33±2      | 94±2     |
| 5                  | 0.8                        | 32±1      | 94±1     |
| 6                  | 1.0                        | 32±1      | 93±1     |

<sup>a</sup>Unless otherwise stated, the standard conditions are: alkene **1** (1.0 mM), P450<sub>BM3</sub>-QTG (biocatalytic loading indicated in the table), KPi buffer (50 mM, pH 7.0), PhSiMeH<sub>2</sub> (2 μL of 8.3 % v/v in DMSO, 2 equiv. compared with alkene **1**), TPGS-750-M (40 μL, from 2 wt. % in H<sub>2</sub>O stock solution), V<sub>tot</sub> 400 μL, 25 °C in air for 24 h; workup by adding aq. Na<sub>2</sub>S<sub>2</sub>O<sub>4</sub> (10 μL, from 0.5 M in H<sub>2</sub>O stock solution). Yield and e.e. were determined by SFC using 1,3,5-trimethoxybenzene as internal standard. Reactions were performed in duplicate, and the standard deviations are listed.

**Supplementary Table 8. Influence of biocatalyst loading on the biocatalytic asymmetric radical hydration of alkene **S1****

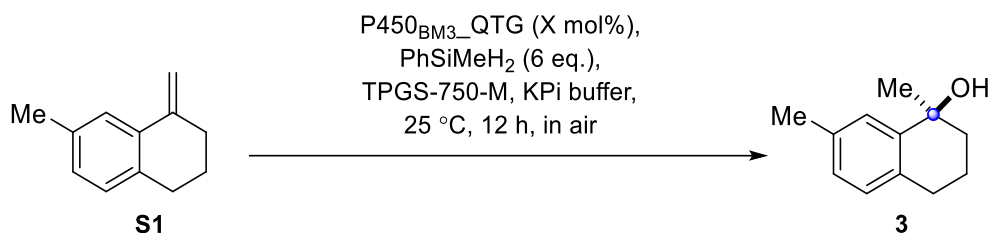

| Entry <sup>a</sup> | Biocatalyst loading (mol%) | Yield (%) | e.e. (%) |
|--------------------|----------------------------|-----------|----------|
| 1                  | 0.1                        | 21±1      | 87±1     |
| 2                  | 0.2                        | 24±1      | 91±0     |
| 3                  | 0.4                        | 17±1      | 89±2     |
| 4                  | 0.8                        | 16±1      | 83±1     |

<sup>a</sup>Unless otherwise stated, the standard conditions are: alkene **S1** (1.0 mM), P450<sub>BM3</sub>-QTG (biocatalytic loading indicated in the table), KPi buffer (50 mM, pH 7.0), PhSiMeH<sub>2</sub> (2 μL of 25 % v/v in DMSO, 6 equiv. compared with alkene **S1**), TPGS-750-M (40 μL, from 4 wt. % in H<sub>2</sub>O stock solution), V<sub>tot</sub> 400 μL, 25 °C in air for 12 h; workup by adding aq. Na<sub>2</sub>S<sub>2</sub>O<sub>4</sub> (10 μL, from 0.5 M in H<sub>2</sub>O stock solution). Yield and e.e. were determined by SFC using 1,3,5-trimethoxybenzene as internal standard. Reactions were performed in duplicate, and the standard deviations are listed.



**Supplementary Table 9. Reaction optimization of the P450<sub>BM3</sub>\_QTG catalyzed asymmetric radical hydration of alkene 1**

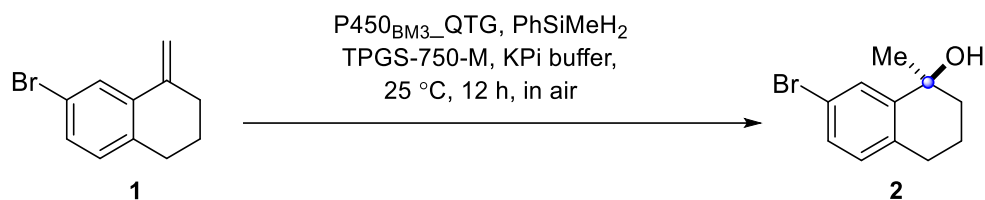

| Entry <sup>a</sup> | Variations                    | Yield (%) | e.e. (%) |
|--------------------|-------------------------------|-----------|----------|
| 1                  | Standard conditions           | 66±3      | 92±0     |
| 2 <sup>b</sup>     | w/o TPGS-750-M                | 33±1      | 88±0     |
| 3 <sup>c</sup>     | w/ PhSiH <sub>3</sub> (6 eq.) | 9±1       | 91±2     |
| 4 <sup>d</sup>     | w/o P450 <sub>BM3</sub> _QTG  | 0         | -        |
| 5 <sup>e</sup>     | w/o PhSiMeH <sub>2</sub>      | 0         | -        |

<sup>a</sup>Unless otherwise stated, the standard conditions are: alkene **1** (1.0 mM), P450<sub>BM3</sub>\_QTG (2 μM, 0.2 mol % catalytic loading), KPi buffer (50 mM, pH 7.0), PhSiMeH<sub>2</sub> (2 μL of 25 % v/v in DMSO, 6 equiv. compared with alkene **1**), TPGS-750-M (40 μL, from 4 wt. % in H<sub>2</sub>O stock solution), V<sub>tot</sub> 400 μL, 25 °C in air for 12 h; workup by adding aq. Na<sub>2</sub>S<sub>2</sub>O<sub>4</sub> (10 μL, from 0.5 M in H<sub>2</sub>O stock solution). Yield and e.e. were determined by SFC using 1,3,5-trimethoxybenzene as internal standard. Reactions were performed in duplicate, and the standard deviations are listed. <sup>b</sup>Milli-Q water (40 μL) was used instead of surfactant. <sup>c</sup>PhSiH<sub>3</sub> (2 μL of 15 % v/v in DMSO, 6 equiv. compared with alkene **1**) instead of PhSiMeH<sub>2</sub>. <sup>d</sup>No P450<sub>BM3</sub>\_QTG added. <sup>e</sup>No PhSiMeH<sub>2</sub> added.

## 2.2 Determination of the absolute configuration of tetralol 2

### (1) Synthetic procedure for the synthesis of the reference sample (*R*)-2

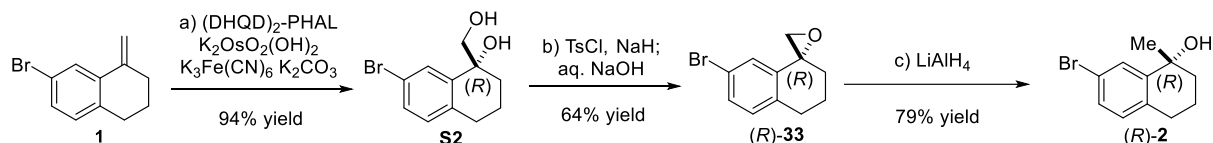

### Supplementary Fig. 1. Synthetic route for enantiopure (*R*)-2.

The synthesis of alkene **1** was performed according to the general procedure A (see below).

**Diol S2:** The synthesis was carried out according to a modified procedure<sup>1</sup>. To a stirred solution of (DHQD)<sub>2</sub>-PHAL (7.8 mg, 0.01 mmol), K<sub>2</sub>OsO<sub>2</sub>(OH)<sub>4</sub> (1.8 mg, 0.005 mmol), K<sub>3</sub>Fe(CN)<sub>6</sub> (988 mg, 3.0 mmol) and K<sub>2</sub>CO<sub>3</sub> (414 mg, 3.0 mmol) in *t*-BuOH/H<sub>2</sub>O (20 mL, 1:1 v./v.) was added alkene **1** (223 mg, 1.0 mmol) at 0 °C. The reaction mixture was stirred at 0 °C for 12 h before quenching with saturated aq. Na<sub>2</sub>S<sub>2</sub>O<sub>3</sub> (10 mL). The resulting mixture was gradually thawed to 22 °C, and stirred at that temperature for 2 h before diluting with ethyl acetate (60 mL). The mixture was extracted with ethyl acetate, and the combined organic extracts were sequentially washed with aq. H<sub>2</sub>SO<sub>4</sub> (5 wt.%), saturated aq. NaHCO<sub>3</sub> and brine, dried over anhydrous MgSO<sub>4</sub> and filtered. The solvent was evaporated under vacuum, and the residue was subjected to flash chromatography using ethyl acetate/petroleum ether (1:3) to afford the diol **S2** (234 mg, 94% yield) as a pale yellow oil. The absolute configuration of major enantiomer was determined to be (*R*)-**S2** according to the reported literature<sup>2</sup>.

**Epoxide (*R*)-33:** To a stirred solution of diol **S2** (77.1 mg, 0.3 mmol) in THF (5.0 mL) was added NaH (30 mg, 60% in mineral oil, 0.75 mmol) at 0 °C. The reaction mixture was stirred at that 0 °C for 5 min, followed by the addition TsCl (74.3 mg, 0.39 mmol) in a single portion. The reaction mixture was stirred at that temperature for 3 h before adding aq. NaOH (1.0 M), followed by stirring at 0 °C for 5 min. The mixture was extracted with CH<sub>2</sub>Cl<sub>2</sub>, and the combined organic phases were dried over anhydrous Na<sub>2</sub>SO<sub>4</sub> and filtered. The solvent was evaporated under vacuum, and the residue was subjected to flash chromatography using ethyl acetate/petroleum ether (1:10) to afford the epoxide (*R*)-**33** (46 mg, 64% yield) as a pale yellow oil.

**Tetralol (*R*)-2:** To a stirred solution of epoxide (*R*)-**33** (47.8 mg, 0.2 mmol) in diethyl ether (2 mL) was added LiAlH<sub>4</sub> (0.2 mL, 1.0 M in Et<sub>2</sub>O, 0.2 mmol) at 0 °C. The resulting mixture was stirred at that temperature for 30 min before quenching with aq. NaOH (15 wt.%). The resulting mixture was extracted with diethyl ether, and the combined organic phases were dried over anhydrous MgSO<sub>4</sub> and filtered. The solvent was evaporated under vacuum, and the residue was

subjected to flash chromatography using ethyl acetate/petroleum ether (1:5) to afford the tetralol (*R*)-**2** (38 mg, 79% yield) as white solid.

## (2) Characterization of the synthesized compounds

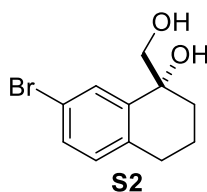

**Diol S2:**  $^1\text{H}$  NMR (600 MHz,  $\text{CD}_3\text{CN}$ )  $\delta$  7.64 (d,  $J = 2.2$  Hz, 1H), 7.30 (dd,  $J = 8.2, 2.2$  Hz, 1H), 7.07–6.96 (m, 1H), 3.56 (dd,  $J = 11.3, 6.6$  Hz, 1H), 3.44 (ddd,  $J = 11.3, 5.8, 0.8$  Hz, 1H), 3.31 (s, 1H), 3.05 (dd,  $J = 6.7, 5.8$  Hz, 1H), 2.78–2.64 (m, 2H), 2.13 (dddd,  $J = 13.1, 6.9, 3.2, 0.8$  Hz, 1H), 1.87–1.73 (m, 2H), 1.68–1.61 (m, 1H) ppm;  $^{13}\text{C}$  NMR (151 MHz,  $\text{CD}_3\text{CN}$ )  $\delta$  143.8, 137.8, 131.5, 130.8, 130.7, 119.6, 73.1, 69.4, 33.5, 29.7, 20.4 ppm; HRMS ( $m/z$ ):  $[\text{M}+\text{Na}]^+$  calcd for  $\text{C}_{11}\text{H}_{13}\text{BrO}_2\text{Na}^+$  278.9991, found 278.9991.

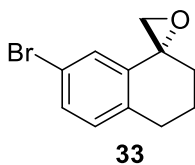

**Epoxide 33:**  $^1\text{H}$  NMR (600 MHz,  $\text{CD}_3\text{CN}$ )  $\delta$  7.31 (dd,  $J = 8.2, 2.2$  Hz, 1H), 7.14 (d,  $J = 2.2$  Hz, 1H), 7.07–7.02 (m, 1H), 2.95–2.90 (m, 2H), 2.82–2.76 (m, 2H), 2.02–1.89 (m, 3H), 1.79–1.70 (m, 1H) ppm.  $^{13}\text{C}$  NMR (151 MHz,  $\text{CD}_3\text{CN}$ )  $\delta$  139.9, 139.6, 131.6, 131.2, 127.1, 120.2, 59.4, 56.7, 31.9, 29.6, 22.4. HRMS ( $m/z$ ):  $[\text{M}+\text{H}]^+$  calcd for  $\text{C}_{11}\text{H}_{12}\text{BrO}^+$  239.0066, found 239.0065.

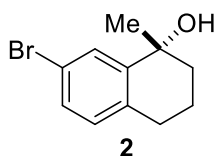

**Tetralol 2:**  $^1\text{H}$  NMR (600 MHz,  $\text{CD}_2\text{Cl}_2$ )  $\delta$  7.70 (d,  $J = 2.3$  Hz, 1H), 7.26 (dd,  $J = 8.2, 2.2$  Hz, 1H), 7.01–6.93 (m, 1H), 2.80–2.64 (m, 2H), 1.98–1.73 (m, 5H), 1.50 (s, 3H) ppm.  $^{13}\text{C}$  NMR (126 MHz,  $\text{CD}_2\text{Cl}_2$ )  $\delta$  145.9, 135.8, 131.0, 130.3, 129.7, 119.9, 70.7, 39.8, 31.1, 29.6, 20.7. HRMS ( $m/z$ ):  $[\text{M}+\text{H}]^+$  calcd for  $\text{C}_{11}\text{H}_{14}\text{BrO}^+$  241.0223, found 241.0223.

### (3) SFC traces used to assign absolute configuration of tetralol **2** resulting from enzymatic alkene hydration of alkene **1**

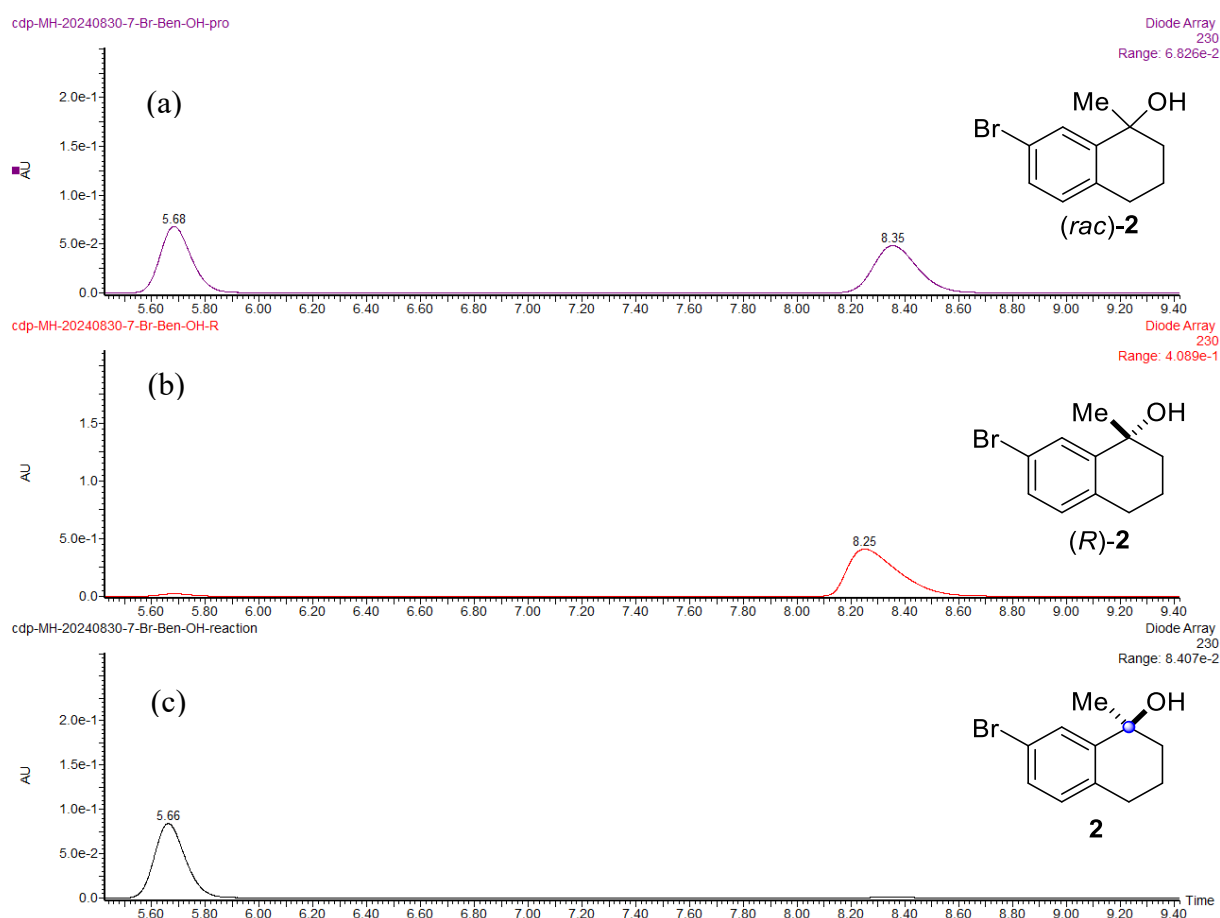

**Supplementary Fig. 2. SFC traces of tetralol **2**.** (a) Synthesized racemic tetralol **2**. (b) Synthesized tetralol (*R*)-**2**. (c) Biocatalytic reaction of alkene **1** catalyzed by P450<sub>BM3</sub>\_QTG and PhSiMeH<sub>2</sub>. The absolute configuration of the major enantiomer for the biocatalytic asymmetric alkene hydration was determined to be (*S*)-**2**.

## 2.3 Summary of the substrate scope for the P450<sub>BM3</sub>-catalyzed alkene hydration

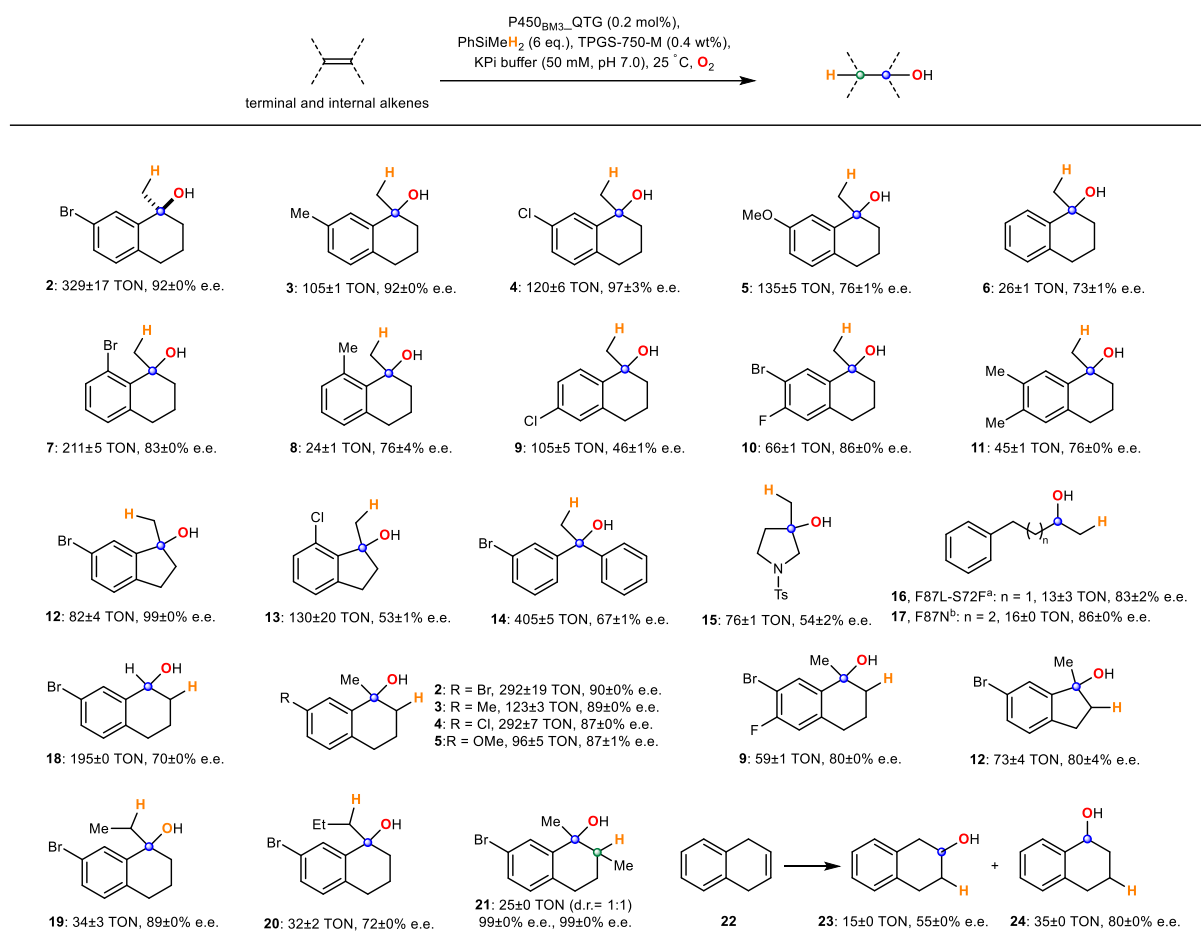

### Supplementary Fig. 3. Substrate scope for the asymmetric radical alkene hydration

catalyzed by the evolved radical hydratase. General procedure, unless otherwise stated: alkene substrate (1.0 mM), purified P450<sub>BM3</sub>\_QTG (2 μM, 0.2 mol % catalytic loading), KPi buffer (50 mM, pH 7.0), PhSiMeH<sub>2</sub> (2 μL of 25 % v/v in DMSO, 6 equiv. compared with alkene substrate), TPGS-750-M (40 μL, from 4 wt. % in H<sub>2</sub>O stock solution), V<sub>tot</sub> 400 μL, 25 °C in air for 12 h; workup by adding aq. Na<sub>2</sub>S<sub>2</sub>O<sub>4</sub> (10 μL, from 0.5 M in H<sub>2</sub>O stock solution). Yield and e.e. were determined by SFC, using 1,3,5-trimethoxybenzene as an internal standard. Reactions were performed in duplicate, and the standard deviations are listed. <sup>a</sup>alkene substrate (1.25 mM), purified P450<sub>BM3</sub>\_QTG (12.5 μM, 1 mol % catalytic loading), PhSiH<sub>3</sub> (2 μL of 50 % v/v in DMSO, 16 equiv. compared with alkene substrate), TPGS-1000-M (40 μL, from 2 wt. % in H<sub>2</sub>O stock solution), 25 °C in air for 24 h. <sup>b</sup>alkene substrate (0.625 mM), purified P450<sub>BM3</sub>\_QTG (5 μM, 0.8 mol % catalytic loading), PhSiH<sub>3</sub> (2 μL of 50 % v/v in DMSO, 32 equiv. compared with alkene substrate), TPGS-1000-M (40 μL, from 2 wt. % in H<sub>2</sub>O stock solution), 25 °C in air for 24 h.

### 3. Mechanistic studies

#### 3.1 Deuterium-labeling experiments

##### (1) Deuterium-labeling experiment with alkene **1** using PhSiD<sub>3</sub>

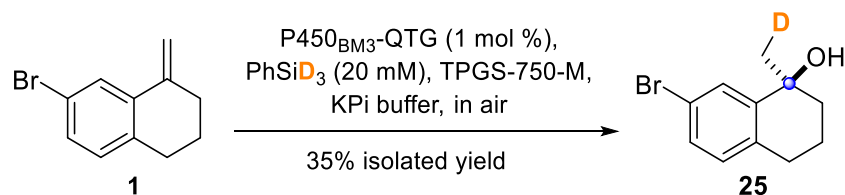

#### Supplementary Fig. 4. Determining the D-incorporation using PhSiD<sub>3</sub> for the P450<sub>BM3</sub>-QTG-catalyzed radical hydration of alkene **1**.

**Experimental procedure:** Phenylsilane-*d*<sub>3</sub> was prepared following a reported procedure<sup>3</sup>. An Erlenmeyer flask (100 mL) was charged successively with purified P450<sub>BM3</sub>-QTG (40 mL, KPi buffer (50 mM, pH 7.0), 1.0 mol% biocatalyst loading), TPGS-750-M surfactant (4.5 mL, from 2 wt% in H<sub>2</sub>O stock solution) and alkene **1** (10 mg in 200 μL DMSO). The reaction was placed in a thermoshaker (5 min, 25 °C, shaken at 260 rpm). Afterwards, PhSiD<sub>3</sub> (110 μL in 110 μL DMSO) was added. The reaction was placed in a thermoshaker (24 h, 25 °C, shaken at 260 rpm). The reaction was quenched by adding Na<sub>2</sub>S<sub>2</sub>O<sub>4</sub> (50 mg) and stirred at that temperature for 10 min. The resulting mixture was diluted with ethyl acetate (50 mL). The aqueous phase was extracted with ether acetate (50 mL × 2), and the combined organic phases were washed with brine, dried over anhydrous Na<sub>2</sub>SO<sub>4</sub>, and filtered. The solvent was evaporated under vacuum, and the residue was subjected to flash column using dichloromethane to afford tetralol **25** (3.8 mg, 35% yield) as a colorless oil. The e.e. of isolated tetralol **25** was determined to be 96% e.e. by SFC analysis.

**(2) Deuterium-labeling experiment with alkene **26** using PhSiD<sub>3</sub>**

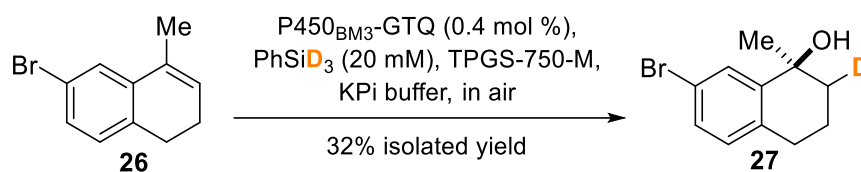

**Supplementary Fig. 5. Determining the D-incorporation using PhSiD<sub>3</sub> for the P450<sub>BM3</sub>\_QTG-catalyzed radical hydration of alkene **26**.**

**Experimental procedure:** The biocatalytic radical cyclization was performed using the following procedure: An Erlenmeyer flask (100 mL) was charged successively with purified P450<sub>BM3</sub>\_QTG (40 mL, KPi buffer (50 mM, pH 7.0), 0.4 mol% biocatalyst loading), TPGS-750-M surfactant (4.5 mL, from 2 wt% in H<sub>2</sub>O stock solution) and alkene **26** (10 mg in 200  $\mu$ L DMSO). The reaction was placed in a thermoshaker (5 min, 25  $^{\circ}$ C, shaken at 260 rpm). Next, PhSiD<sub>3</sub> (110  $\mu$ L in 110  $\mu$ L DMSO) was added. The reaction was placed in a thermoshaker (24 h, 25  $^{\circ}$ C, shaken at 260 rpm). The reaction was quenched by adding Na<sub>2</sub>S<sub>2</sub>O<sub>4</sub> (50 mg) and stirred at that temperature for 10 min. The resulting mixture was diluted with ethyl acetate (50 mL). The aqueous phase was extracted with ether acetate (50 mL  $\times$  2), and the combined organic phases were washed with brine, dried over anhydrous Na<sub>2</sub>SO<sub>4</sub>, and filtered. The solvent was evaporated under vacuum, and the residue was subjected to flash column using dichloromethane to afford tetralol **27** (3.5 mg, 32% yield) as a colorless oil. The e.e. of isolated tetralol **27** was determined to be 95% e.e. by SFC analysis.



### (3) $^1\text{H}$ NMR spectra

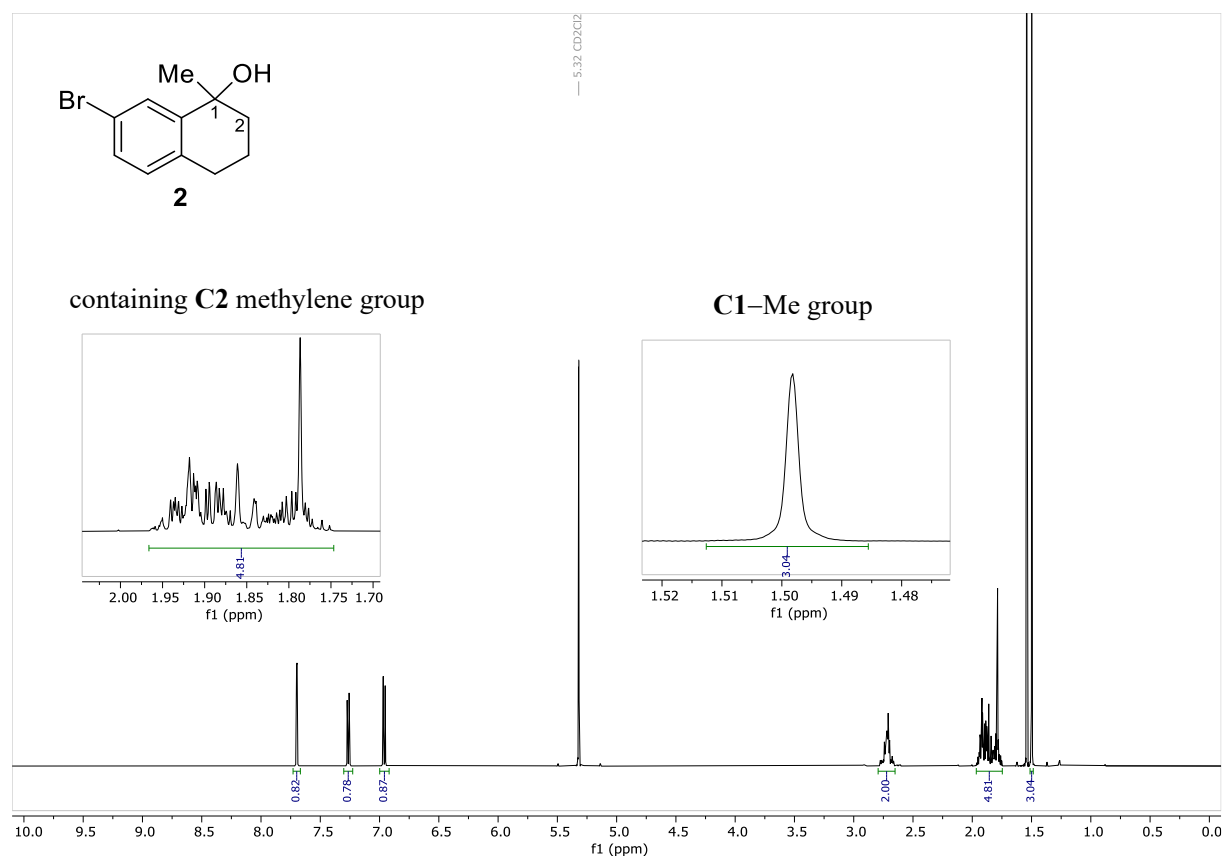

Supplementary Fig. 6.  $^1\text{H}$  NMR spectrum of tetralol **2** ( $\text{CD}_2\text{Cl}_2$ , 500 MHz, 20 °C).

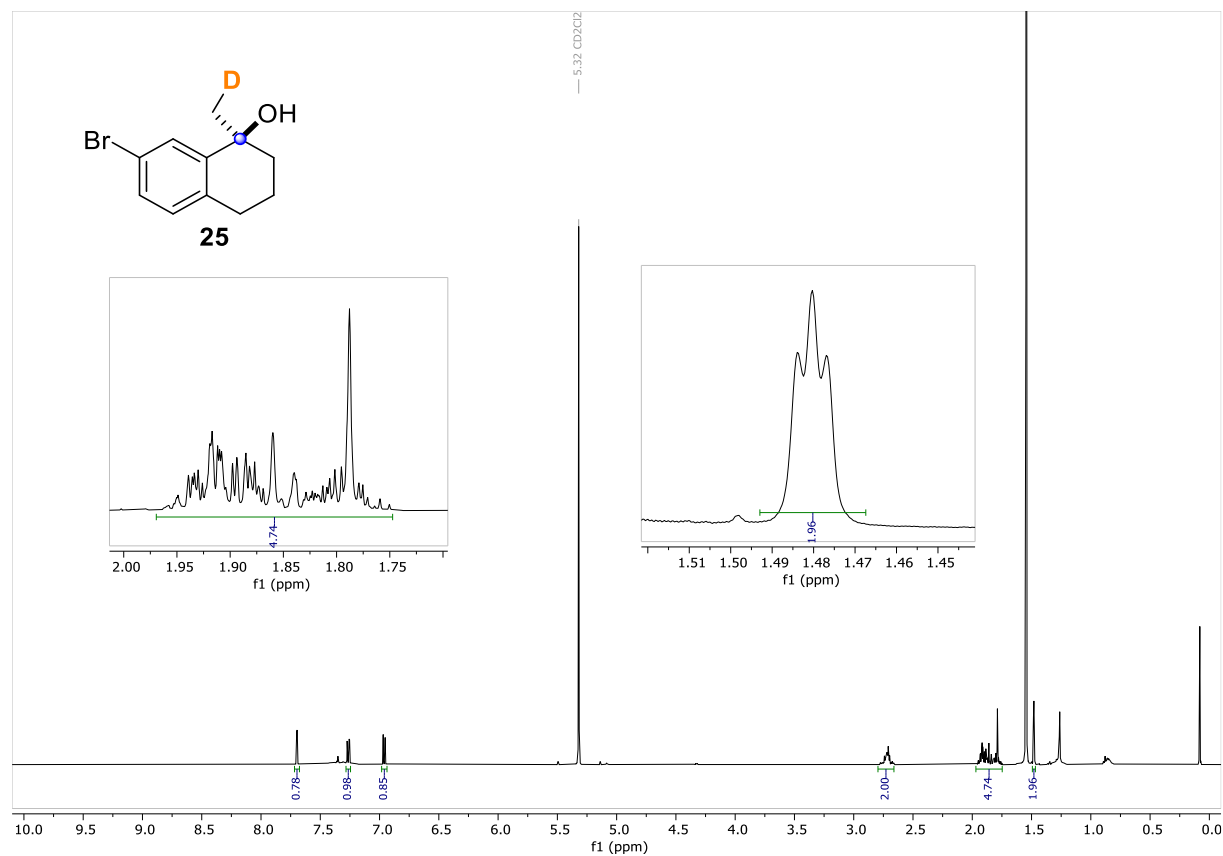

Supplementary Fig. 7.  $^1\text{H}$  NMR spectrum of  $D_1$ -tetralol **25** ( $\text{CD}_2\text{Cl}_2$ , 500 MHz, 20 °C).

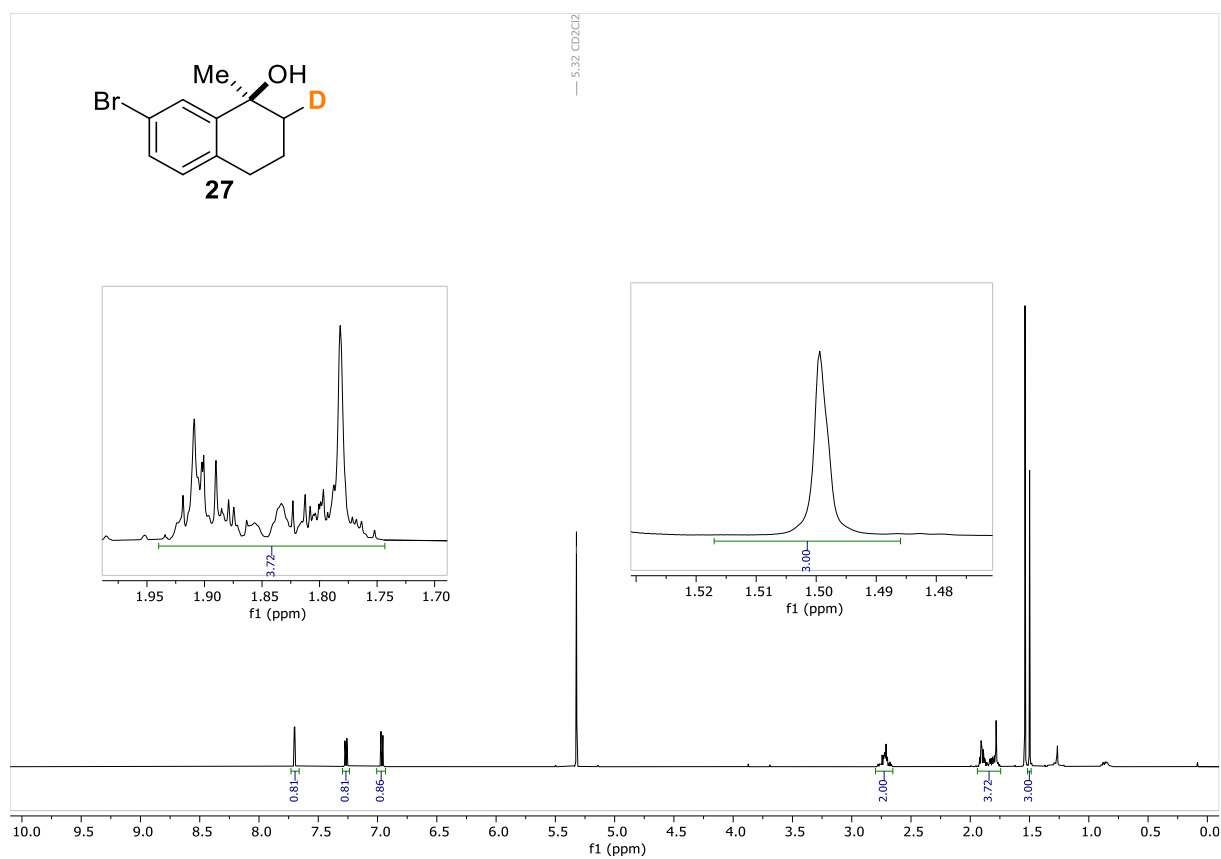

**Supplementary Fig. 8.** <sup>1</sup>H NMR spectrum of *D*<sub>1</sub>-tetralol **27** (CD<sub>2</sub>Cl<sub>2</sub>, 500 MHz, 20 °C).

### 3.2 Radical-clock experiment

#### (1) Biocatalytic reaction with radical-clock substrate **28**

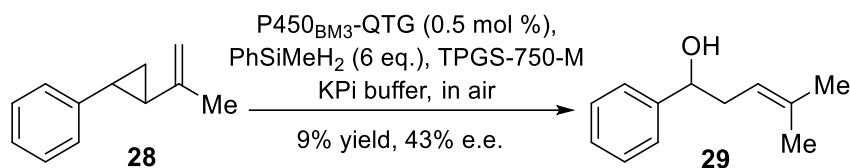

**Supplementary Fig. 9. Radical-clock experiment with alkene **28** in the presence of P450<sub>BM3</sub>\_QTG and PhSiMeH<sub>2</sub>.**

Alkene **28**<sup>4</sup> and alcohol **29**<sup>5</sup> were prepared according to reported procedures, and their spectra are identical to the reported data.

**Experimental procedure:** A glass vial (2 mL) was charged successively with purified P450<sub>BM3</sub>\_QTG (356  $\mu$ L, KPi buffer (50 mM, pH 7.0), 0.5 mol% biocatalyst loading), TPGS-750-M (40  $\mu$ L, from 4 wt% in H<sub>2</sub>O stock solution) and the alkene substrate **28** (2.0  $\mu$ L of 200 mM in DMSO). The vial was incubated in a thermoshaker (5 min, 25  $^{\circ}$ C, shaken at 600 rpm). Next, PhSiMeH<sub>2</sub> (2  $\mu$ L of 25% v/v in DMSO) was added, and the reaction was placed in a thermoshaker (12 h, 25  $^{\circ}$ C, shaken at 600 rpm). The reaction mixture was quenched by adding aq. Na<sub>2</sub>S<sub>2</sub>O<sub>4</sub> (10  $\mu$ L, from 0.5 M in H<sub>2</sub>O stock solution) and stirred at that temperature for 10 min. The resulting mixture was diluted with ethyl acetate (containing 5 mM 1,3,5-trimethoxybenzene as internal standard, 80  $\mu$ L), followed by adding ethyl acetate (320  $\mu$ L). After vortexing, the mixture was centrifuged (4  $^{\circ}$ C, 17000 g, 2 min). The clear supernatant (100  $\mu$ L) was transferred into a vial for SFC analysis. The yield and e.e. of alcohol **29** were 9% and 43% e.e, respectively.

## (2) SFC traces of reactions in the presence of alkene **28**

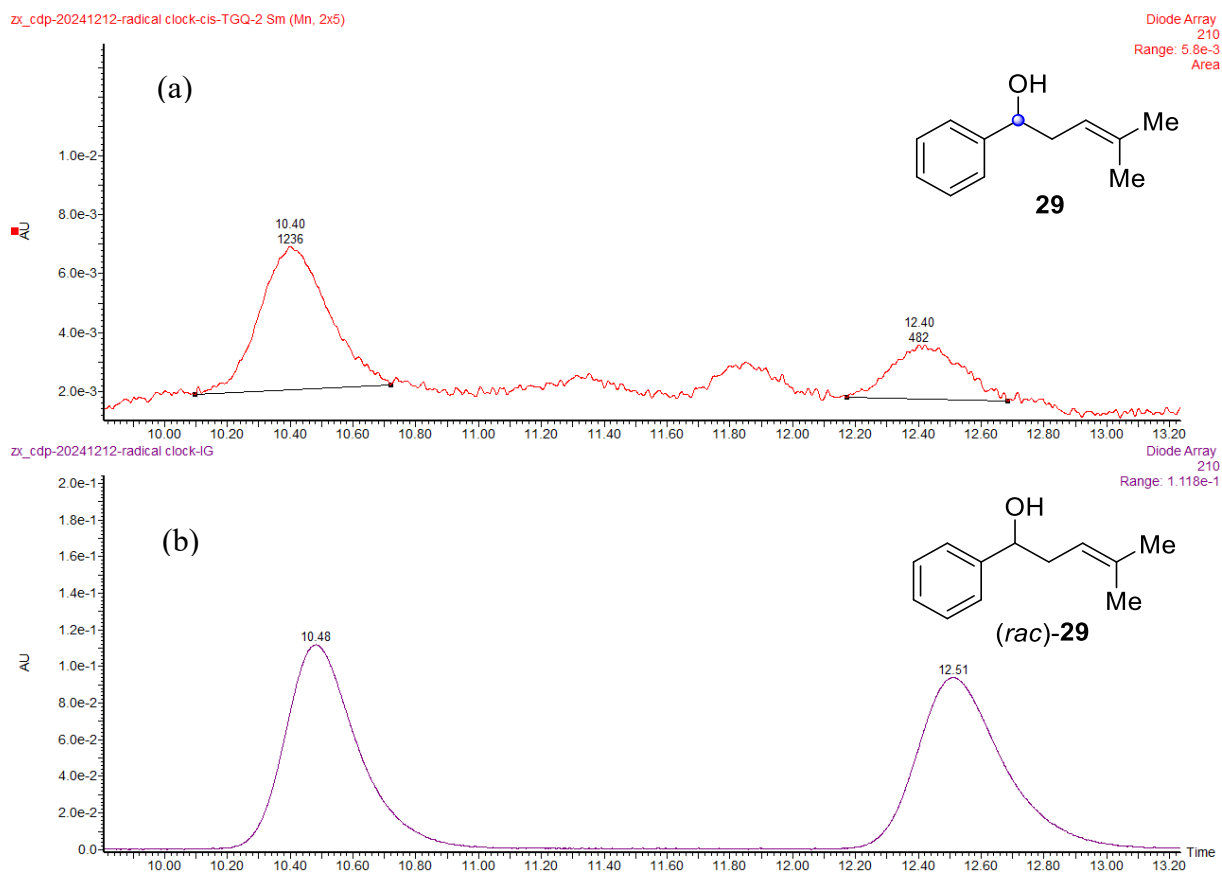

**Supplementary Fig. 10. SFC traces for radical-clock experiment.** (a) Biocatalytic reaction of alkene **28** catalyzed by P450<sub>BM3</sub>\_QTG and PhSiMeH<sub>2</sub>. (b) Synthesized racemic alcohol **29**. Chiral SFC separation conditions: Chiralpak IG, 4.6 × 250 mm; isocratic, 3% MeOH in CO<sub>2</sub>, 2.5 mL/min, 210 nm; retention time: 10.48 min, 12.51 min. 1,3,5-trimethoxybenzene was used as internal standard (4.59 min).

### 3.3 Determination of the oxygen source by $^{18}\text{O}$ -labeling experiments

#### (1) Biocatalytic reaction of alkene **1** with $^{18}\text{OH}_2$

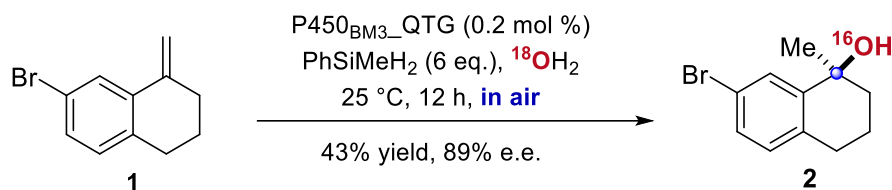

#### Supplementary Fig. 11. $^{18}\text{O}$ -labeling of alkene **1** with $^{18}\text{OH}_2$ under aerobic conditions.

**Experimental procedure:** A glass vial (2 mL) was charged successively with purified P450<sub>BM3</sub>\_QTG (388  $\mu\text{L}$ ,  $^{18}\text{OH}_2$ , 0.2 mol% biocatalyst loading) and the alkene **1** (2.0  $\mu\text{L}$  of 200 mM in DMSO). The vial was incubated in a thermoshaker (5 min, 25 °C, shaken at 600 rpm). Next, PhSiMeH<sub>2</sub> (2  $\mu\text{L}$  of 25% v/v in DMSO) was added, and the reaction was placed in a thermoshaker (12 h, 25 °C, shaken at 600 rpm). The reaction mixture was quenched by adding aq. Na<sub>2</sub>S<sub>2</sub>O<sub>4</sub> (10  $\mu\text{L}$ , from 0.5 M in  $^{18}\text{OH}_2$  stock solution), stirred at that temperature for 10 min. The resulting mixture was diluted with ethyl acetate (containing 5 mM 1,3,5-trimethoxybenzene as internal standard, 80  $\mu\text{L}$ ), followed by addition of ethyl acetate (320  $\mu\text{L}$ ). After vortexing, the mixture was centrifuged (4 °C, 17000 g, 2 min). The clear supernatant (100  $\mu\text{L}$ ) was transferred into two vials for SFC and GC-MS analyses. The yield and e.e. of tetralol **2** were determined by SFC analysis to be 43% yield and 89% e.e. The isotopic identity of tetralol **2** was verified by GC-MS, confirming that no  $^{18}\text{O}$ -incorporation results from the use of  $^{18}\text{OH}_2$ .

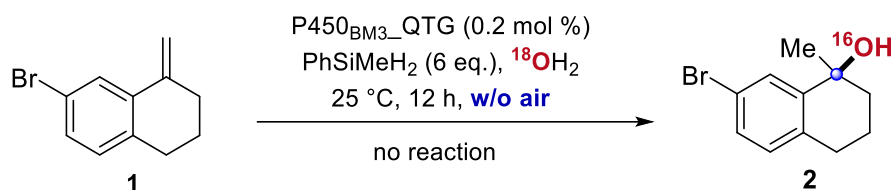

**Supplementary Fig. 12.**  $^{18}\text{O}$ -labeling experiment with alkene **1** and  $^{18}\text{OH}_2$  under anaerobic conditions.

**Experimental procedure:** All reagents, samples and solvents were degassed and transferred into a glove box. A glass vial (2 mL) was charged successively with purified P450<sub>BM3</sub>\_QTG (388  $\mu\text{L}$ ,  $^{18}\text{OH}_2$ , 0.2 mol% biocatalyst loading) and the alkene **1** (2.0  $\mu\text{L}$  of 200 mM in DMSO). The vial was incubated in a thermoshaker (5 min, 25  $^\circ\text{C}$ , shaken at 600 rpm). Afterwards, PhSiMeH<sub>2</sub> (2  $\mu\text{L}$  of 25% v/v in DMSO) was added, and the reaction was placed in a thermoshaker (12 h, 25  $^\circ\text{C}$ , shaken at 600 rpm). The reaction mixture was quenched by a spatula tip of Na<sub>2</sub>S<sub>2</sub>O<sub>4</sub>, and stirred at that temperature for 10 min. The resulting mixture was diluted with ethyl acetate (containing 5 mM 1,3,5-trimethoxybenzene as internal standard, 80  $\mu\text{L}$ ), followed by addition of ethyl acetate (320  $\mu\text{L}$ ). After vortexing, the vial was removed from the glove box and the mixture was centrifuged (4  $^\circ\text{C}$ , 17000 g, 2 min). The clear supernatant (100  $\mu\text{L}$ ) was transferred into two vials for separate SFC and GC-MS analyses. No reaction was observed according to SFC and GC-MS analyses.

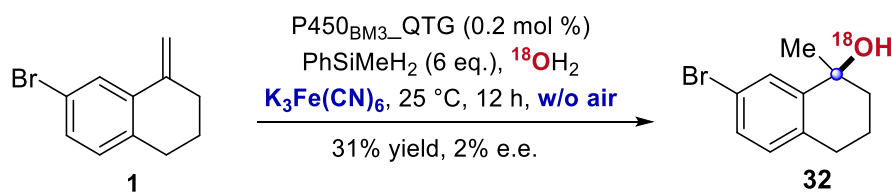

**Supplementary Fig. 13.**  $^{18}\text{O}$ -labeling experiment with alkene **1** and  $^{18}\text{OH}_2$  under anaerobic conditions in the presence of  $\text{K}_3\text{Fe}(\text{CN})_6$  as oxidant.

**Experimental procedure:** All reagents, samples and solvents were degassed and transferred into a glove box. A glass vial (2 mL) was charged successively with purified  $\text{P450}_{\text{BM3\_QTG}}$  (378  $\mu\text{L}$ ,  $^{18}\text{OH}_2$ , 0.2 mol% biocatalyst loading), the alkene **1** (2.0  $\mu\text{L}$  of 200 mM in DMSO) and  $\text{K}_3\text{Fe}(\text{CN})_6$  (10.0  $\mu\text{L}$ , from 200 mM in  $^{18}\text{OH}_2$  stock solution). The vial was incubated in a thermoshaker (5 min, 25 °C, shaken at 600 rpm). Next,  $\text{PhSiMeH}_2$  (2  $\mu\text{L}$  of 25% v/v in DMSO) was added, and the reaction was placed in a thermoshaker (12 h, 25 °C, shaken at 600 rpm). The reaction mixture was quenched by adding a spatula tip of  $\text{Na}_2\text{S}_2\text{O}_4$  and stirred at that temperature for 10 min. The resulting mixture was diluted with ethyl acetate (containing 5 mM 1,3,5-trimethoxybenzene as internal standard, 80  $\mu\text{L}$ ), followed by additional ethyl acetate (320  $\mu\text{L}$ ). After vortexing, the vial was removed from the glove box, and the mixture was centrifuged (4 °C, 17000 g, 2 min). The clear supernatant (100  $\mu\text{L}$ ) was transferred into two vials for SFC and GC-MS analyses. The yield (31 %) and e.e. (2 % ee) of tetralol **32** were determined by SFC. The isotopic identity of tetralol **32** was verified by GC-MS to confirm the incorporation of  $^{18}\text{O}$ .

## (2) Chromatograms of SFC and GC-MS

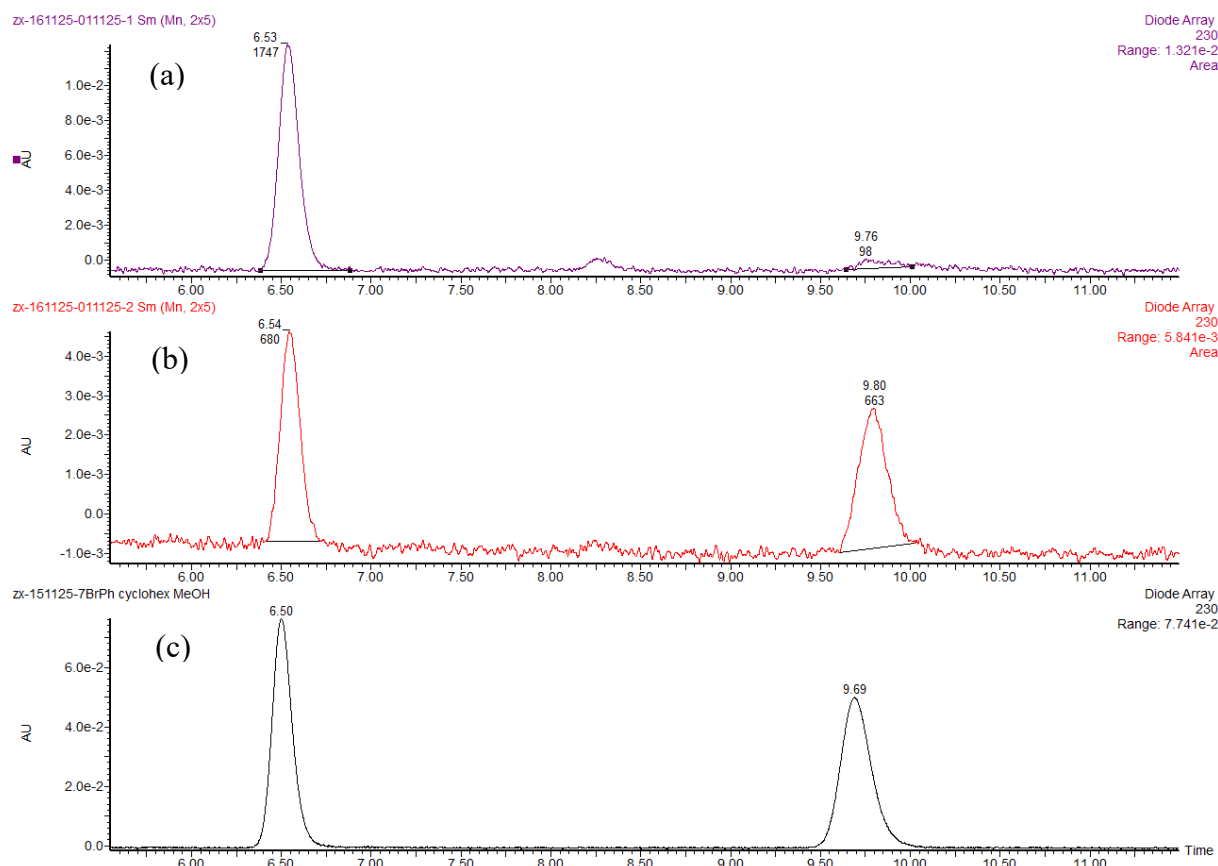

**Supplementary Fig. 14. SFC traces for  $^{18}\text{O}$ -labeling experiments.** (a) Biocatalytic reaction of alkene **1** with  $^{18}\text{OH}_2$  under aerobic conditions. (b) Biocatalytic reaction of alkene **1** with  $^{18}\text{OH}_2$  under anaerobic conditions in the presence of  $\text{K}_3\text{Fe}(\text{CN})_6$ . (c) Synthesized racemic tetralol **2**.



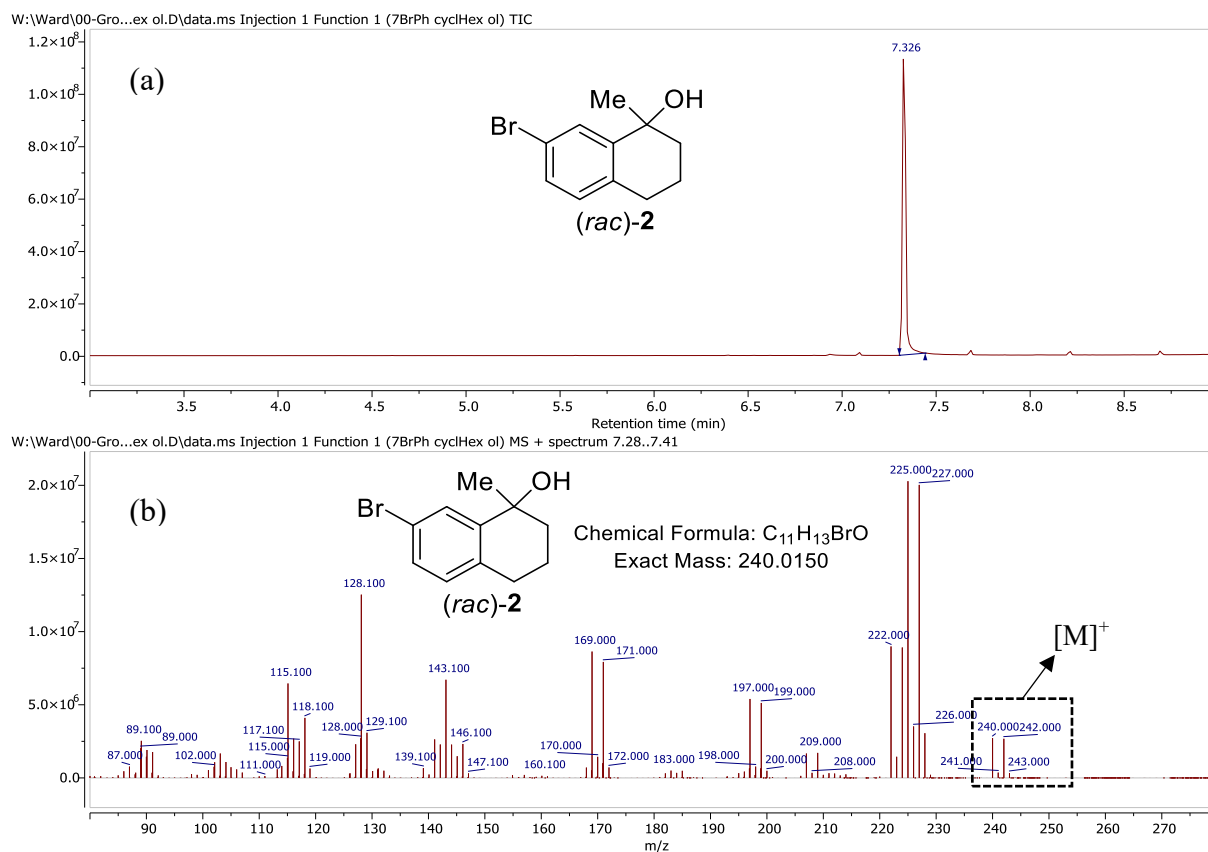

**Supplementary Fig. 15. GC-MS traces of racemic tetralol 2.** (a) GC chromatogram of synthesized racemic tetralol 2. (b) Mass spectrum extracted at 7.326 min retention time (corresponding to tetralol 2) in the GC-MS chromatogram.

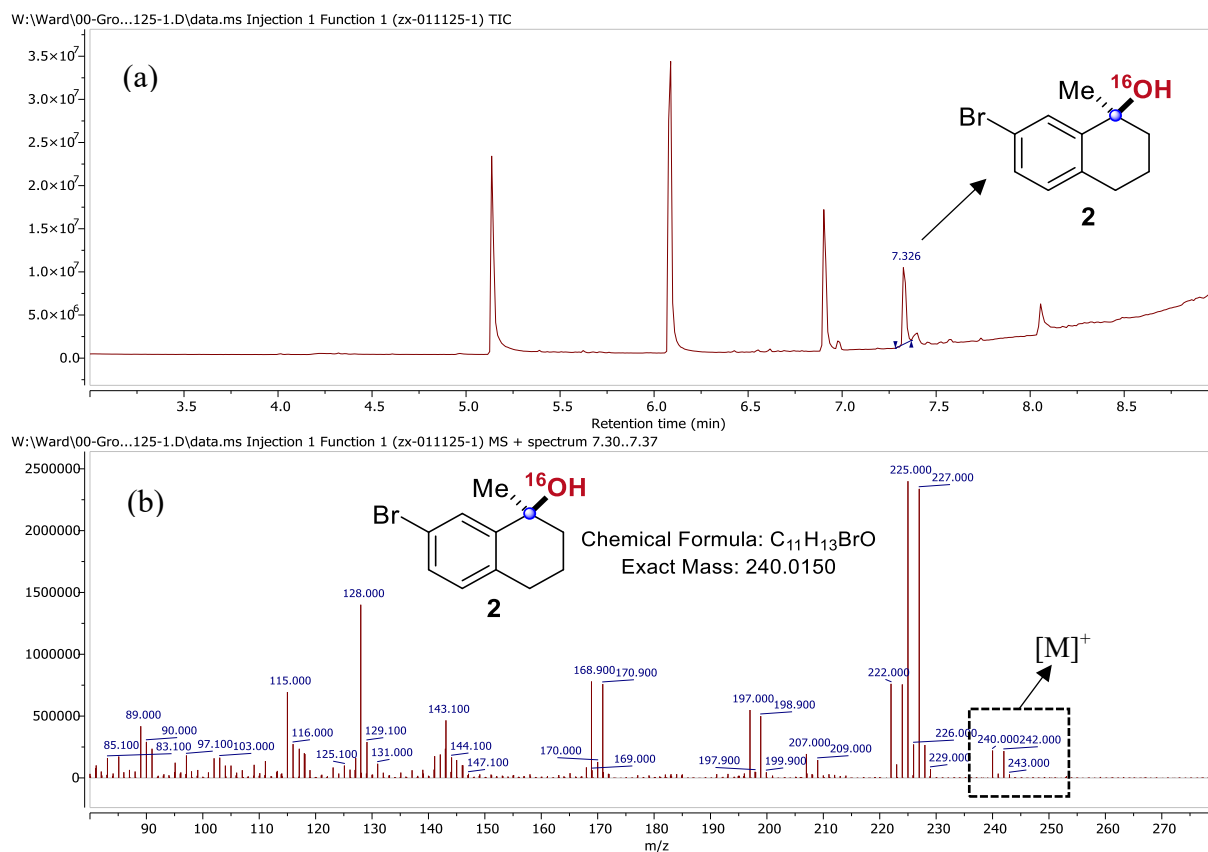

**Supplementary Fig. 16. GC-MS traces of aerobic <sup>18</sup>O-labeling experiment.** (a) GC chromatogram of biocatalytic reaction of alkene **1** with <sup>18</sup>OH<sub>2</sub> under aerobic conditions. (b) Mass spectrum extracted at 7.326 min retention time (corresponding to tetralol **2**) in the GC-MS chromatogram, **confirming no incorporation of <sup>18</sup>O** (compare to Supplementary Fig 15 b).

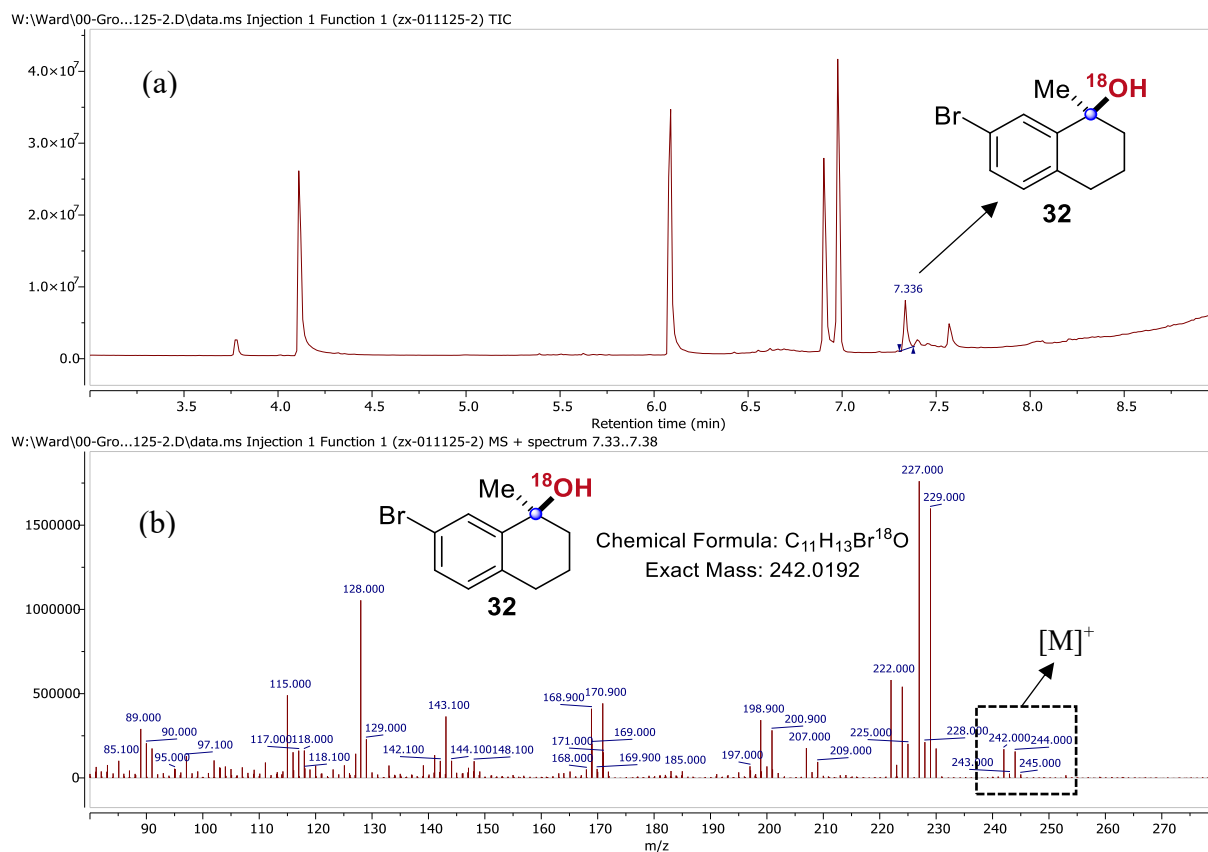

**Supplementary Fig. 17. GC-MS traces of anaerobic <sup>18</sup>O-labeling experiment in the presence of K<sub>3</sub>Fe(CN)<sub>6</sub>.** (a) GC chromatogram of the biocatalytic reaction of alkene **1** with <sup>18</sup>OH<sub>2</sub> under anaerobic conditions in the presence of K<sub>3</sub>Fe(CN)<sub>6</sub> as oxidant. (b) Mass spectrum extracted at 7.336 min retention time (corresponding to tetralol **32**) in the GC-MS chromatogram, **confirming the incorporation of <sup>18</sup>O** (compare to Supplementary Fig 15 b).

### 3.4 Biocatalytic reaction with epoxide

#### (1) Synthesis of (*rac*)-epoxide **33**

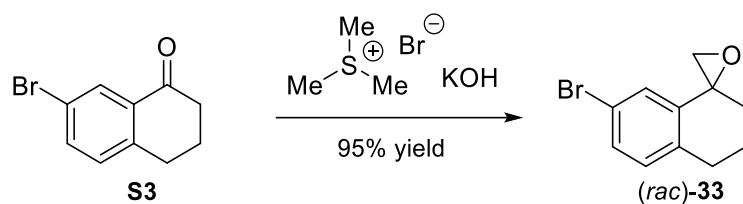

#### Supplementary Fig. 18. Synthesis of racemic epoxide **33**.

**Racemic epoxide **33**:** To a stirred solution of trimethylsulfonium bromide (3.06 g, 15 mmol) in MeCN (15 mL) potassium hydroxide (4.21 g, 75 mmol) and water (0.05 mL) were added at 22 °C. The reaction mixture was warmed to 60 °C and stirred for 5 min. Next, a solution of commercially available ketone **S3** (2.25 g, 10 mmol, in 3.0 mL MeCN) was added, and the reaction mixture was stirred at 60 °C for 3 h before cooling to 22 °C. The resulting mixture was diluted with diethyl ether (75 mL) and filtered to remove insoluble salts. The filtrate was diluted with hexane and extracted with water. The organic phases were dried over anhydrous MgSO<sub>4</sub> and filtered. The solvent was evaporated under vacuum, and the residue was subjected to flash chromatography using diethyl ether/petroleum ether (1:4) containing triethyl amine (0.1% v/v) to afford the epoxide (*rac*)-**33** (2.27 g, 95% yield) as a yellow oil (see characterization data of epoxide **33** in Section 2.2)

## (2) Biocatalytic reaction with the racemic epoxide **33**

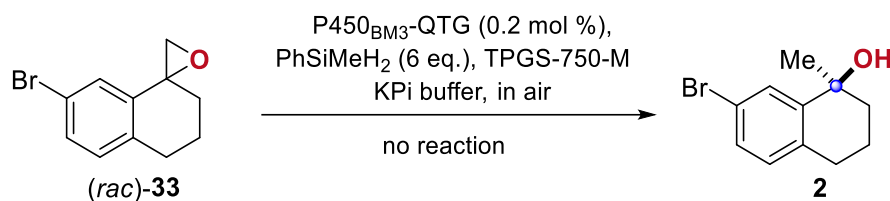

**Supplementary Fig. 19. Biocatalytic reaction with epoxide *(rac)*-**33** in the presence of P450<sub>BM3</sub>\_QTG and PhSiMeH<sub>2</sub>.**

**Experimental procedure:** A glass vial (2 mL) was charged successively with purified P450<sub>BM3</sub>\_QTG (356  $\mu$ L, KPi buffer (50 mM, pH 7.0), 0.2 mol% biocatalyst loading), TPGS-750-M (40  $\mu$ L, from 4 wt% in H<sub>2</sub>O stock solution) and the epoxide *(rac)*-**33** (2.0  $\mu$ L of 200 mM in DMSO). The vial was incubated in a thermoshaker (5 min, 25  $^{\circ}$ C, shaken at 600 rpm). Next, PhSiMeH<sub>2</sub> (2  $\mu$ L of 25% v/v in DMSO) was added, and the reaction was placed in a thermoshaker (12 h, 25  $^{\circ}$ C, shaken at 600 rpm). The reaction mixture was quenched by adding aq. Na<sub>2</sub>S<sub>2</sub>O<sub>4</sub> (10  $\mu$ L, from 0.5 M in H<sub>2</sub>O stock solution) and stirred for 10 min. The resulting mixture was diluted with ethyl acetate (containing 5 mM 1,3,5-trimethoxybenzene as internal standard, 80  $\mu$ L), followed by additional ethyl acetate (320  $\mu$ L). After vortexing, the mixture was centrifuged (4  $^{\circ}$ C, 17000 g, 2 min). The clear supernatant (100  $\mu$ L) was transferred into a vial for SFC analysis. No tetralol **2** was detected by SFC, suggesting that the epoxide is not an intermediate in the biocatalytic cycle.

### 3.5 Time-course monitoring experiments

**Supplementary Table 10. Time-course monitoring of the biocatalytic asymmetric alkene hydration reaction**

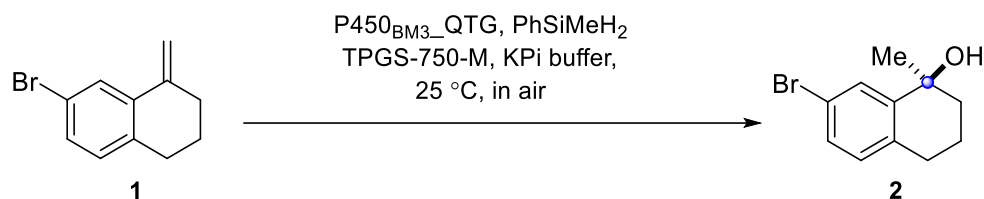

| Entry <sup>a</sup> | Reaction time | Yield of <b>2</b> (%) | e.e. of <b>2</b> (%) | Recovery of <b>1</b> (%) | Mass balance |
|--------------------|---------------|-----------------------|----------------------|--------------------------|--------------|
| 1                  | 10 min        | 19±1                  | 68±1                 | 78±2                     | 98±1         |
| 2                  | 30 min        | 26±1                  | 75±1                 | 65±0                     | 91±1         |
| 3                  | 1 h           | 34±1                  | 77±0                 | 52±1                     | 86±3         |
| 4                  | 2 h           | 36±1                  | 80±1                 | 46±0                     | 82±1         |
| 5                  | 4 h           | 46±1                  | 86±0                 | 29±2                     | 75±3         |
| 6                  | 6.5 h         | 52±1                  | 90±1                 | 19±0                     | 71±2         |
| 7                  | 12 h          | 66±3                  | 92±0                 | 9±1                      | 74±3         |
| 8                  | 24 h          | 56±2                  | 92±1                 | 9±1                      | 64±3         |
| 9                  | 42 h          | 56±1                  | 91±1                 | 8±1                      | 64±2         |

<sup>a</sup>Unless otherwise stated, the standard conditions are: alkene **1** (1.0 mM), P450<sub>BM3</sub>-QTG (2 μM, 0.2 mol % catalytic loading), KPi buffer (50 mM, pH 7.0), PhSiMeH<sub>2</sub> (2 μL of 25 % v/v in DMSO, 6 equiv. compared with alkene **1**), TPGS-750-M (40 μL, from 4 wt. % in H<sub>2</sub>O stock solution), V<sub>tot</sub> 400 μL, 25 °C in air, reaction time was indicated in the table; workup by adding aq. Na<sub>2</sub>S<sub>2</sub>O<sub>4</sub> (10 μL, from 0.5 M in H<sub>2</sub>O stock solution). Yield and e.e. were determined by SFC using 1,3,5-trimethoxybenzene as internal standard. Reactions were performed in duplicate, and the standard deviations are listed.

### 3.6 Detection and characterization of the diol **34**

#### (1) Synthesis of diol **34**

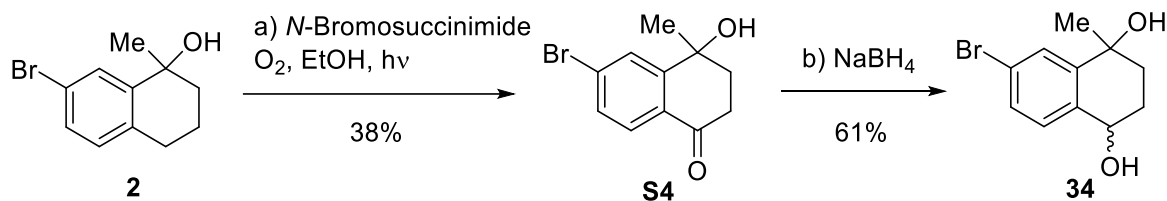

#### Supplementary Fig. 20. Synthesis of diol **34**.

The synthesis of racemic tetralol **2** was performed according to the general procedure **D** (see below).

**Ketone S4:** The synthesis was carried out according to a modified procedure<sup>6</sup>. To a stirred solution of tetralol **2** (100 mg, 0.41 mmol) in EtOH (10 mL) was added *N*-Bromosuccinimide (7.1 mg, 0.04 mmol) at 22 °C. The reaction mixture was stirred in air under light irradiation with an 18 W blue LED (405 nm) at 22 °C for 48 h. The reaction mixture was concentrated *in vacuo*, and the product was purified by flash column using ethyl acetate/petroleum ether (1:1) to afford ketone **S4** (40.2 mg, 38% yield) as white solid.

**Diol 34:** To a stirred solution of ketone **S4** (40.2 mg, 0.16 mmol) in MeOH (1.0 mL), NaBH<sub>4</sub> (18.1 mg, 0.48 mmol) was added at 0 °C. The reaction mixture was stirred for 30 min, before quenching with saturated aq. NH<sub>4</sub>Cl. The mixture was extracted with diethyl ether, and the combined organic phases were dried over anhydrous Na<sub>2</sub>SO<sub>4</sub>, and filtered. The solvent was evaporated under vacuum, and the residue was subjected to flash chromatography using acetone/petroleum ether (1:2) to afford the diol **34** (24.7 mg, 61% yield) as a mixture of diastereomers (d.r. = 2:1).

## (2) Characterization of the synthesized compounds

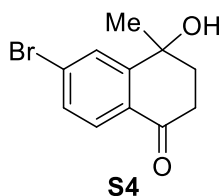

**Ketone S4:**  $^1\text{H}$  NMR (500 MHz,  $\text{CD}_2\text{Cl}_2$ )  $\delta$  7.89 (d,  $J$  = 2.0 Hz, 1H), 7.80 (d,  $J$  = 8.4 Hz, 1H), 7.52 (dd,  $J$  = 8.4, 2.0 Hz, 1H), 2.80 (ddd,  $J$  = 17.9, 4.9, 4.9 Hz, 1H), 2.67 (ddd,  $J$  = 18.0, 9.7, 7.5 Hz, 1H), 2.28–2.24 (m, 2H), 1.60 (s, 3H) ppm;  $^{13}\text{C}$  NMR (126 MHz,  $\text{CD}_2\text{Cl}_2$ )  $\delta$  196.4, 152.0, 131.5, 129.8, 129.6, 129.1, 129.0, 70.4, 38.6, 36.1, 29.3 ppm; HRMS ( $m/z$ ):  $[\text{M}+\text{H}]^+$  calcd for  $\text{C}_{11}\text{H}_{12}\text{BrO}_2^+$  255.0015, found 255.0016.

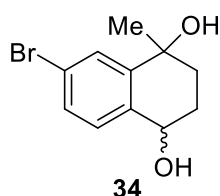

**Diol 34:**  $^1\text{H}$  NMR (600 MHz,  $\text{MeOD-d}_4$ )  $\delta$  7.70 (s, 0.34H), 7.68 (s, 0.66H), 7.40–7.30 (m, 2H), 4.66 (dd,  $J$  = 8.8, 5.0 Hz, 0.66H), 4.63–4.58 (m, 0.34H), 2.24–2.13 (m, 1H), 2.09–1.87 (m, 2H), 1.84–1.75 (m, 1H), 1.52 (s, 2H), 1.45 (s, 1H) ppm;  $^{13}\text{C}$  NMR (151 MHz,  $\text{MeOD-d}_4$ )  $\delta$  146.8, 139.0, 138.5, 131.5, 131.3, 131.2, 130.8, 130.5, 130.4, 122.6, 122.3, 71.1, 70.9, 68.9, 68.0, 37.2, 35.5, 31.2, 30.8, 30.3 ppm; HRMS ( $m/z$ ):  $[\text{M}+\text{H}]^+$  calcd for  $\text{C}_{11}\text{H}_{14}\text{BrO}_2^+$  257.0172, found 257.0172. The NMR analyses confirm the structure of diol **34** (**Supplementary Figs. 79-83**) Chiral SFC separation conditions: Chiralpak IH,  $4.6 \times 250$  mm; isocratic, 8% MeOH in  $\text{CO}_2$ , 2.5 mL/min, 230 nm; retention time: 9.63 min and 10.06 min, 11.88 min and 12.35 min. 1,3,5-trimethoxybenzene was used as internal standard (1.53 min).



### (3) Biocatalytic reaction of alkene **1** with P450<sub>BM3</sub>\_QTG and PhSiMeH<sub>2</sub>

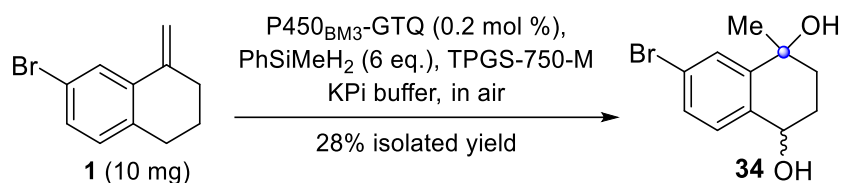

**Supplementary Fig. 21. Biocatalytic reaction of alkene **1** with P450<sub>BM3</sub>\_QTG and PhSiMeH<sub>2</sub>**

**Experimental procedure:** An Erlenmeyer flask (100 mL) was charged successively with purified P450<sub>BM3</sub>\_QTG (40 mL, KPi buffer (50 mM, pH 7.0), 0.2 mol% biocatalyst loading), TPGS-750-M surfactant (4.5 mL, from 2 wt% in H<sub>2</sub>O stock solution) and alkene **1** (10 mg in 200  $\mu$ L DMSO). The reaction was placed in a thermoshaker (5 min, 25  $^{\circ}$ C, shaken at 260 rpm). Afterwards, PhSiD<sub>3</sub> (110  $\mu$ L in 110  $\mu$ L DMSO) was added. The reaction was placed in a thermoshaker (24 h, 25  $^{\circ}$ C, shaken at 260 rpm). The reaction was quenched by adding Na<sub>2</sub>S<sub>2</sub>O<sub>4</sub> (50 mg) and stirred at that temperature for 10 min. The resulting mixture was diluted with ethyl acetate (50 mL). The aqueous phase was extracted with ether acetate (50 mL  $\times$  2), and the combined organic phases were washed with brine, dried over anhydrous Na<sub>2</sub>SO<sub>4</sub>, and filtered. The solvent was evaporated under vacuum, and the residue was subjected to flash chromatography using acetone/petroleum ether (1:2) to afford the diol **34** (3.2 mg, 28% yield) as a mixture of diastereomers (d.r. = 1.5:1, 58% e.e. for major diastereomer and 81% e.e. for minor diastereomer). The proton NMR of the isolated diol **34** proved to be identical to that of independently-synthesized sample (**Supplementary Figs. 22 and 79**), confirming that diol **34** is a byproduct formed in the biocatalytic radical alkene hydration.

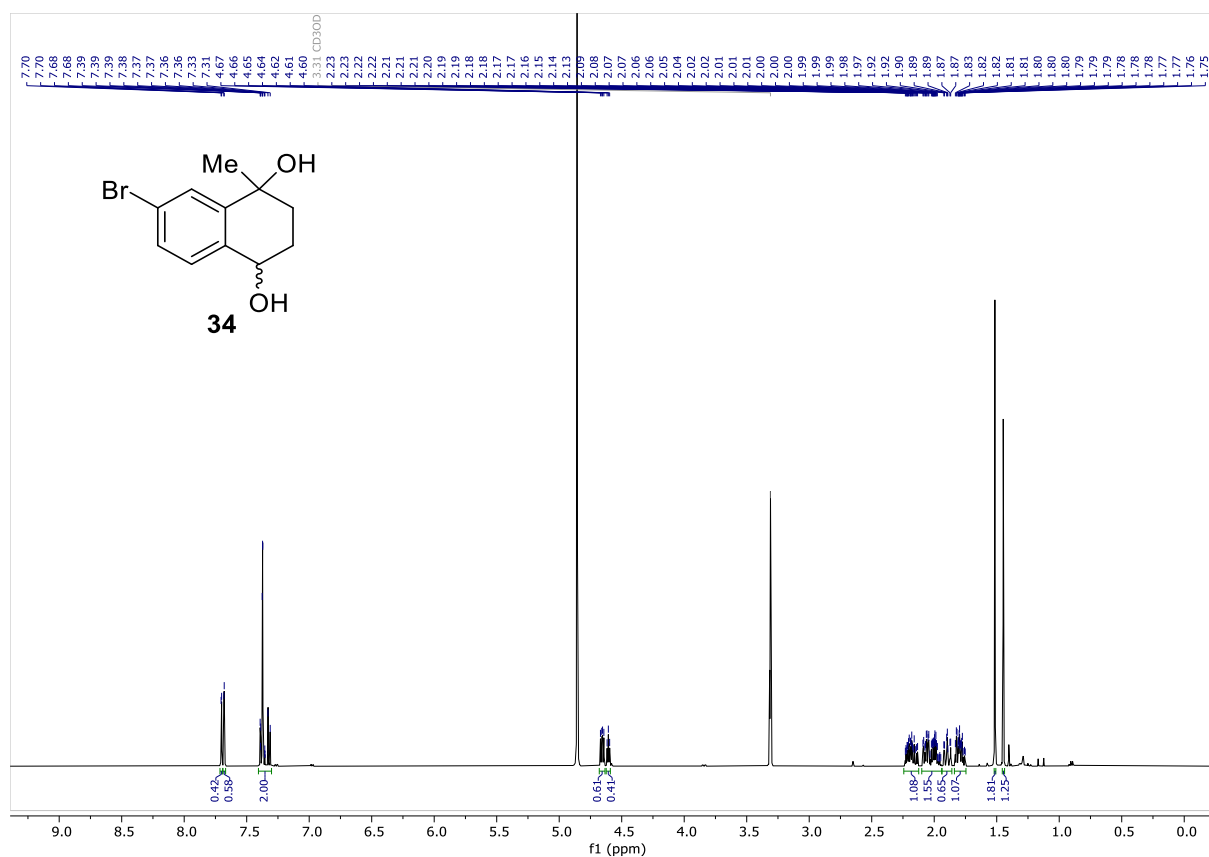

**Supplementary Fig. 22.** <sup>1</sup>H NMR spectrum of diol **34** obtained from the biocatalytic reaction of alkene **1** with P450<sub>BM3</sub>\_QTG and PhSiMeH<sub>2</sub>. (MeOD-d<sub>4</sub>, 500 MHz, 20 °C).

#### (4) Chromatograms of SFC and GC-MS

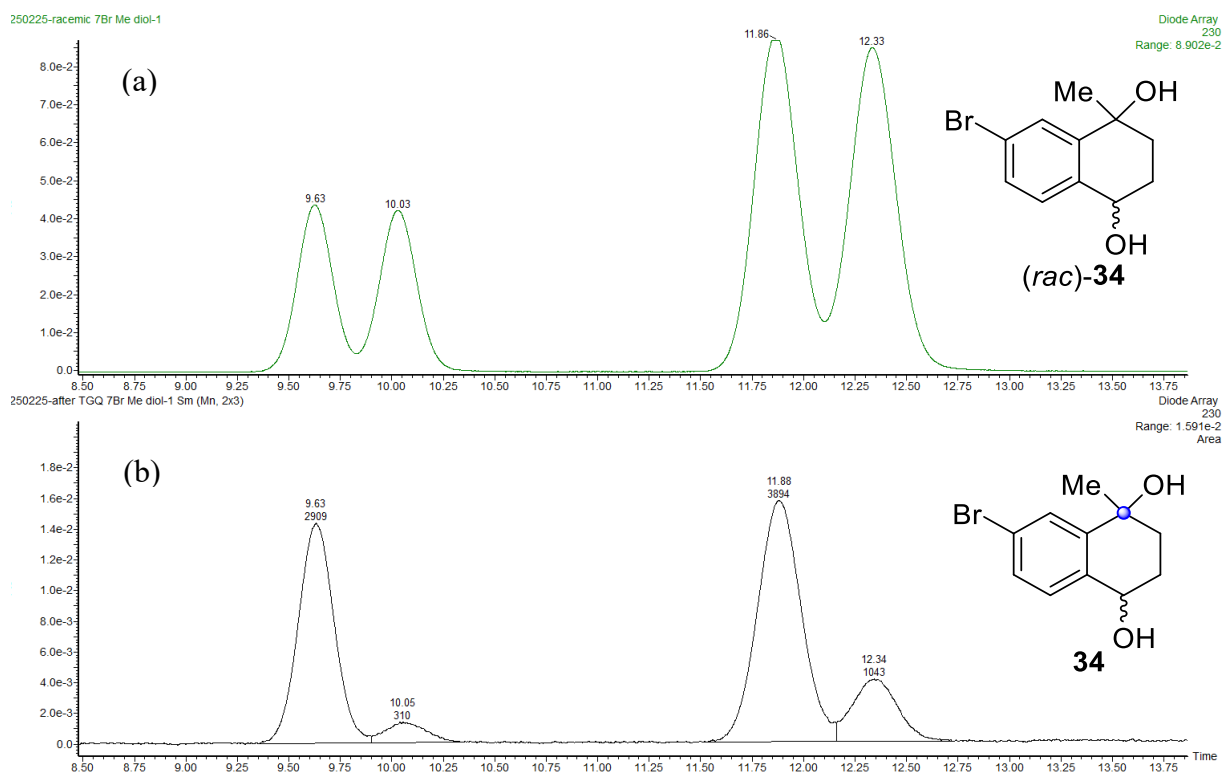

**Supplementary Fig. 23. SFC traces of diol 34.** (a) Diastereomeric mixture of the synthesized racemic diol 34. (b) Biocatalytic reaction of alkene 1 with P450<sub>BM3</sub>\_QTG and PhSiMeH<sub>2</sub>, revealing a 1.5:1 diastereomeric ratio.

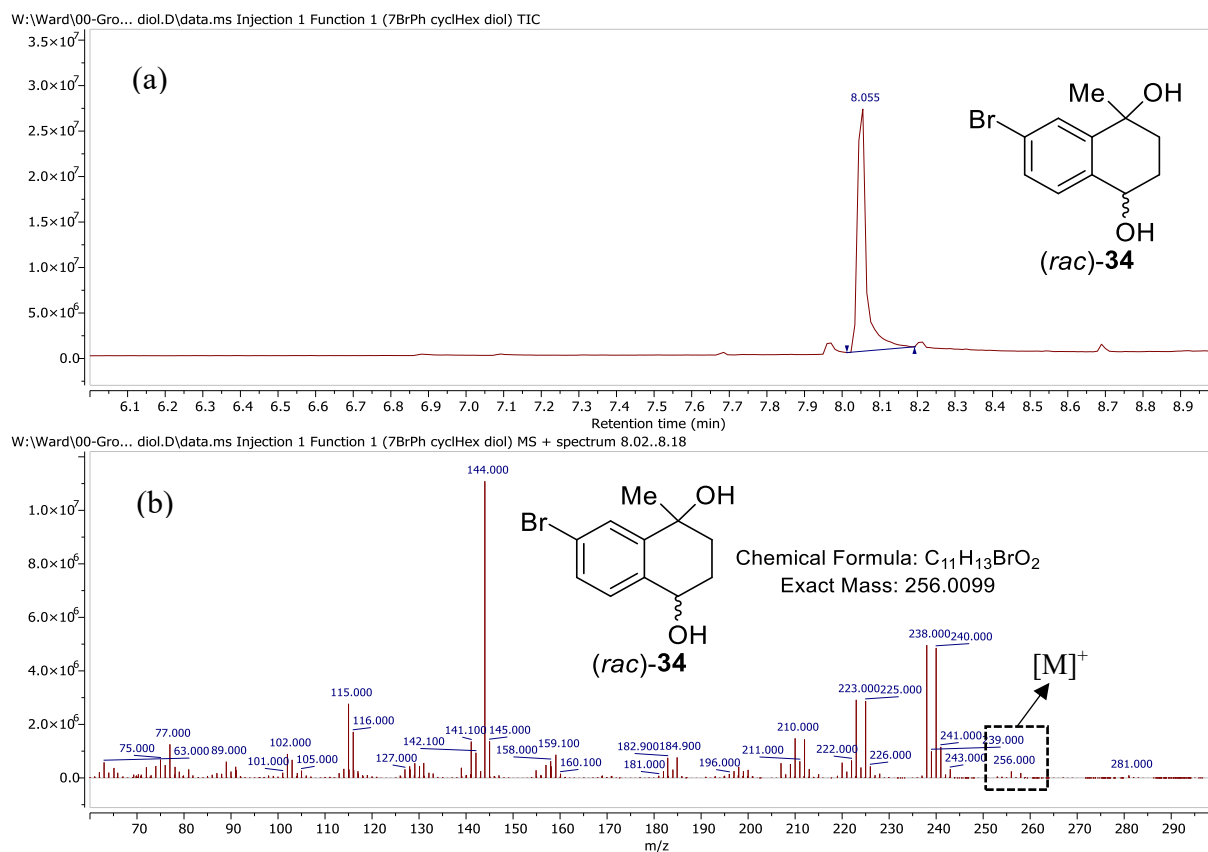

**Supplementary Fig. 24. GC-MS traces of racemic diol 34.** (a) GC chromatogram of independently-synthesized diol 34. (b) Mass spectrum extracted at 8.055 min retention time (corresponding to diol 34) in the GC-MS chromatogram.

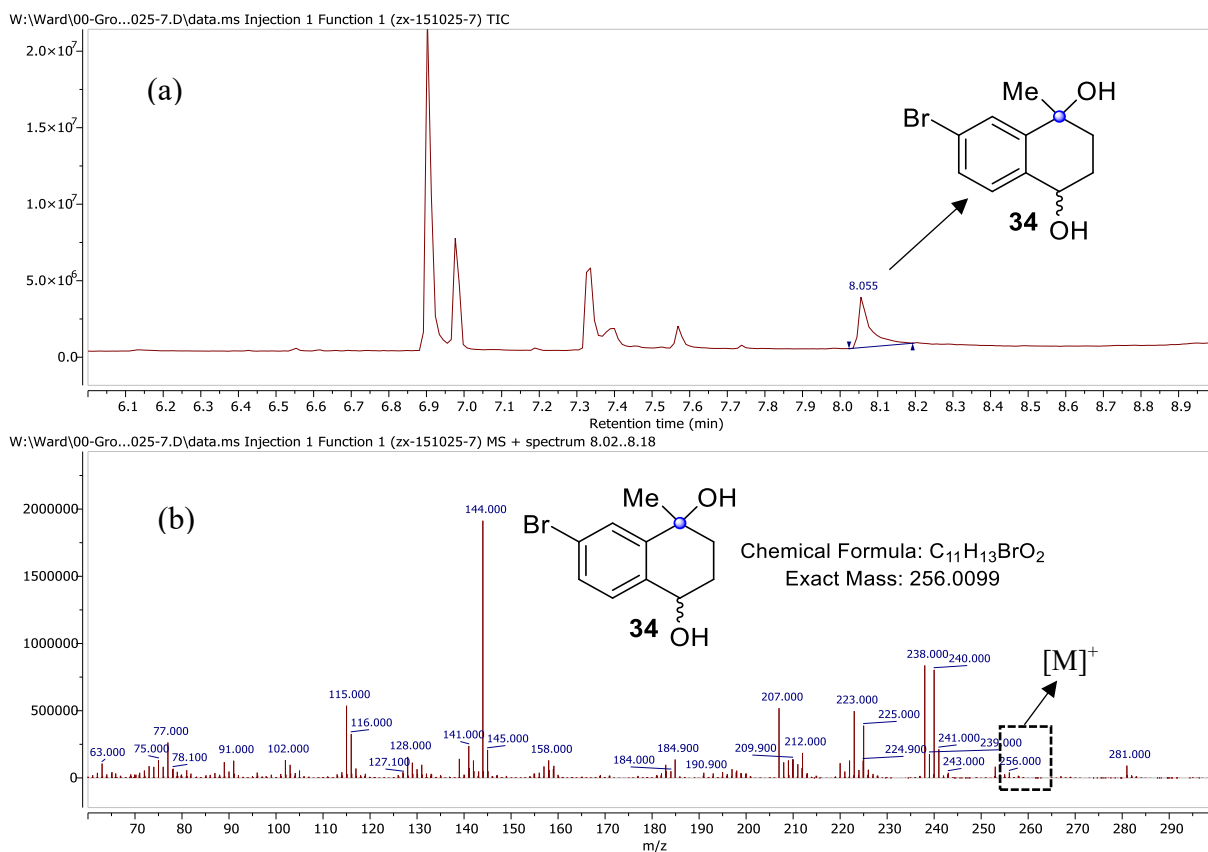

**Supplementary Fig. 25. GC-MS traces of the biocatalytic radical alkene hydration.** (a) GC chromatogram of biocatalytic reaction of alkene **1** with P450<sub>BM3</sub>\_QTG and PhSiMeH<sub>2</sub>. (b) Mass spectrum extracted at 8.055 min retention time (corresponding to diol **34**) in the GC-MS chromatogram. **Both the retention time and mass spectrum of the unknown compound match that of the independently-synthesized diol 34, confirming that diol 34 is the byproduct in the biocatalytic radical alkene hydration.**

**(5) Mass balance analysis of the biocatalytic hydration of alkene **1** with P450<sub>BM3</sub>\_QTG and PhSiMeH<sub>2</sub>**

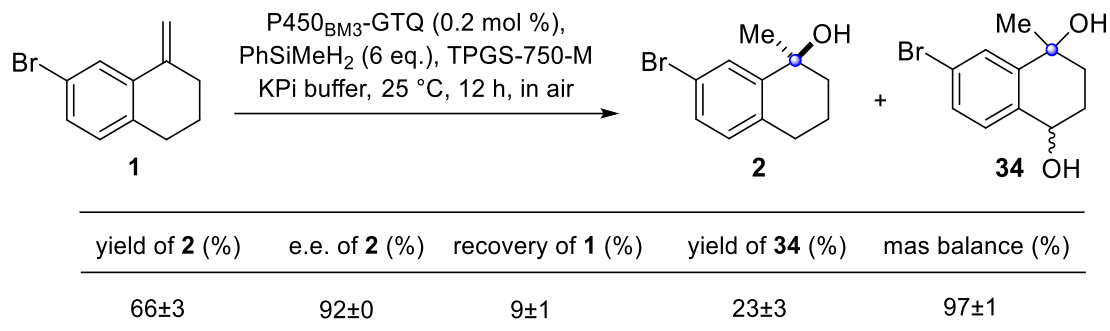

**Supplementary Fig. 26. Mass balance of the biocatalytic radical hydration with alkene **1** determined by SFC and GC-MS analysis of the reaction mixture.**

**Experimental procedure:** A glass vial (2 mL) was charged successively with purified P450<sub>BM3</sub>\_QTG (356 µL, KPi buffer (50 mM, pH 7.0), 0.2 mol% biocatalyst loading), TPGS-750-M (40 µL, from 4 wt% in H<sub>2</sub>O stock solution) and the alkene **1** (2.0 µL of 200 mM in DMSO). The vial was incubated in a thermoshaker (5 min, 25 °C, shaken at 600 rpm). Afterwards, PhSiMeH<sub>2</sub> (2 µL of 25% v/v in DMSO) was added, and the reaction was placed in a thermoshaker (12 h, 25 °C, shaken at 600 rpm). The reaction mixture was quenched by adding aq. Na<sub>2</sub>S<sub>2</sub>O<sub>4</sub> (10 µL, from 0.5 M in H<sub>2</sub>O stock solution) and stirred at that temperature for 10 min. The resulting mixture was diluted with ethyl acetate (containing 5 mM 1,3,5-trimethoxybenzene as internal standard, 80 µL), followed by addition of ethyl acetate (320 µL). After vortexing, the mixture was centrifuged (4 °C, 17000 g, 2 min). The clear supernatant (100 µL) was transferred into a vial for SFC analysis. The yield and e.e. of tetralol **2**, and the recovery of alkene **1** and the yield of diol **34** were determined by SFC analysis and are displayed in the **Supplementary Fig. 26**. The corrected mass balance, determined as the sum of the yields of tetralol **2**, diol **34** and recovered alkene **1** proved to be excellent, confirming that diol **34** is the main byproduct in the biocatalytic radical alkene hydration (see **Supplementary Table 10, Entry 7** for comparison).

### 3.7 Investigation of the formation of diol **34**

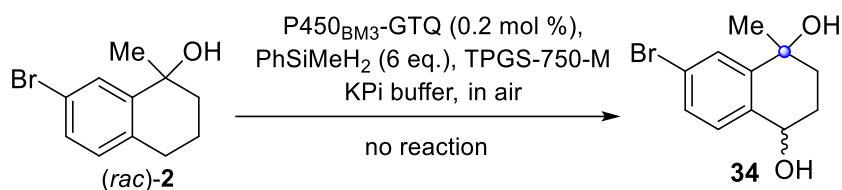

#### Supplementary Fig. 27. Biocatalytic reaction using racemic tetralol **2** as substrate

**Experimental procedure:** A glass vial (2 mL) was charged successively with purified P450<sub>BM3</sub>-QTG (356  $\mu$ L, KPi buffer (50 mM, pH 7.0), 0.2 mol% biocatalyst loading), TPGS-750-M (40  $\mu$ L, from 4 wt% in H<sub>2</sub>O stock solution), and the racemic tetralol **2** (2.0  $\mu$ L of 200 mM in DMSO). The vial was incubated in a thermoshaker (5 min, 25  $^{\circ}$ C, shaken at 600 rpm). Afterwards, PhSiMeH<sub>2</sub> (2  $\mu$ L of 25% v/v in DMSO) was added, and the reaction was placed in a thermoshaker (12 h, 25  $^{\circ}$ C, shaken at 600 rpm). The reaction mixture was quenched by adding aq. Na<sub>2</sub>S<sub>2</sub>O<sub>4</sub> (10  $\mu$ L, from 0.5 M in H<sub>2</sub>O stock solution), and stirred at that temperature for 10 min. The resulting mixture was diluted with ethyl acetate (containing 5 mM 1,3,5-trimethoxybenzene as internal standard, 80  $\mu$ L), followed by addition of ethyl acetate (320  $\mu$ L). After vortexing, the mixture was centrifuged (4  $^{\circ}$ C, 17000 g, 2 min). The clear supernatant (100  $\mu$ L) was transferred into a vial for SFC analysis. No diol **34** was detected and the tetralol **2** was fully recovered in the biocatalytic reaction according to the SFC analysis, suggesting that diol **34** is not directly produced from tetralol **2** under the biocatalytic conditions.

### 3.8 Detection of the hydroperoxide intermediate 35

#### (1) Synthesis of hydroperoxide 35

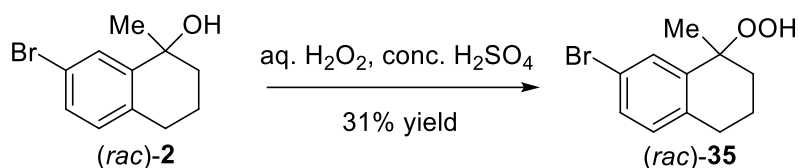

#### Supplementary Fig. 28. Synthesis of racemic hydroperoxide 35.

The synthesis of racemic tetralol **2** was performed according to the general procedure **D** (see below).

**Hydroperoxide 35:** The synthesis was carried out according to a modified procedure<sup>7</sup>. To a stirred solution of tetralol **2** (100 mg, 0.41 mmol) in diethyl ether (2.0 mL), aq. H<sub>2</sub>O<sub>2</sub> (0.5 mL, 30 wt% in H<sub>2</sub>O, 4.9 mmol), and conc. H<sub>2</sub>SO<sub>4</sub> (10  $\mu$ L, 0.19 mmol) were successively added at 0 °C. The reaction mixture was stirred for 1 h. The mixture was then warmed to 22 °C and stirred for 5 h before quenching with saturated aq. NaHCO<sub>3</sub>. The mixture was extracted with diethyl ether, and the combined organic phases were dried over anhydrous Na<sub>2</sub>SO<sub>4</sub>, and filtered. The solvent was evaporated under vacuum, and the residue was subjected to flash chromatography using dichloromethane to afford the (*rac*)-hydroperoxide **35** (33 mg, 31% yield) as a colorless oil.

**Hydroperoxide 35:** <sup>1</sup>H NMR (600 MHz, CDCl<sub>3</sub>)  $\delta$  7.63 (d, *J* = 2.6 Hz, 1H), 7.31 (dd, *J* = 8.2, 2.9 Hz, 1H), 6.99 (d, *J* = 8.2 Hz, 1H), 2.79–2.65 (m, 2H), 2.45–2.37 (m, 1H), 2.02–1.94 (m, 1H), 1.85–1.74 (m, 2H), 1.58 (s, 1H), 1.50 (s, 3H) ppm; <sup>13</sup>C NMR (151 MHz, CDCl<sub>3</sub>)  $\delta$  140.8, 137.5, 131.0, 130.8, 129.5, 120.0, 82.9, 33.0, 29.5, 27.0, 20.4 ppm; HRMS (*m/z*): [M+Na]<sup>+</sup> calcd for C<sub>11</sub>H<sub>13</sub>BrO<sub>2</sub>Na<sup>+</sup> 278.9991, found 278.9991.

Chiral SFC separation conditions: Chiralpak IA, 4.6  $\times$  250 mm; gradient, 10% *i*-PrOH (14 min)–10% to 30% *i*-PrOH (1 min)–30% *i*-PrOH (3 min)–30% to 10% *i*-PrOH (1 min)–10% *i*-PrOH (1 min), 2.5 mL/min, 230 nm; retention time: 7.61 min, 10.80 min. 1,3,5-trimethoxybenzene was used as internal standard (1.83 min).



**(2) Detection of the hydroperoxide 35 in the biocatalytic asymmetric radical hydration of alkene 1**

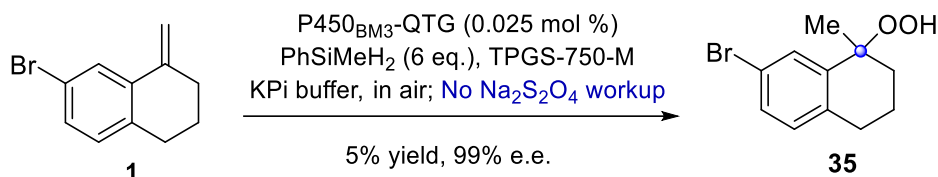

**Supplementary Fig. 29. Biocatalytic radical hydration of alkene 1.**

**Experimental procedure:** A glass vial (2 mL) was charged successively with purified P450<sub>BM3</sub>\_QTG (356  $\mu$ L, KPi buffer (50 mM, pH 7.0), 0.025 mol% biocatalyst loading), TPGS-750-M (40  $\mu$ L, from 4 wt% in H<sub>2</sub>O stock solution) and the racemic tetralol **2** (2.0  $\mu$ L of 200 mM in DMSO). The vial was incubated in a thermoshaker (5 min, 25 °C, shaken at 600 rpm). Next, PhSiMeH<sub>2</sub> (2  $\mu$ L of 25% v/v in DMSO) was added, and the reaction was placed in a thermoshaker (12 h, 25 °C, shaken at 600 rpm). The reaction mixture was quenched by adding ethyl acetate (containing 5 mM 1,3,5-trimethoxybenzene as internal standard, 80  $\mu$ L), followed by additional ethyl acetate (320  $\mu$ L). After vortexing, the mixture was centrifuged (4 °C, 17000 g, 2 min). The clear supernatant (100  $\mu$ L) was transferred into a vial for SFC analysis. The yield and e.e. of hydroperoxide **35** were determined to be 5% yield and 99% e.e. according to SFC analysis.

### (3) Chromatograms of SFC

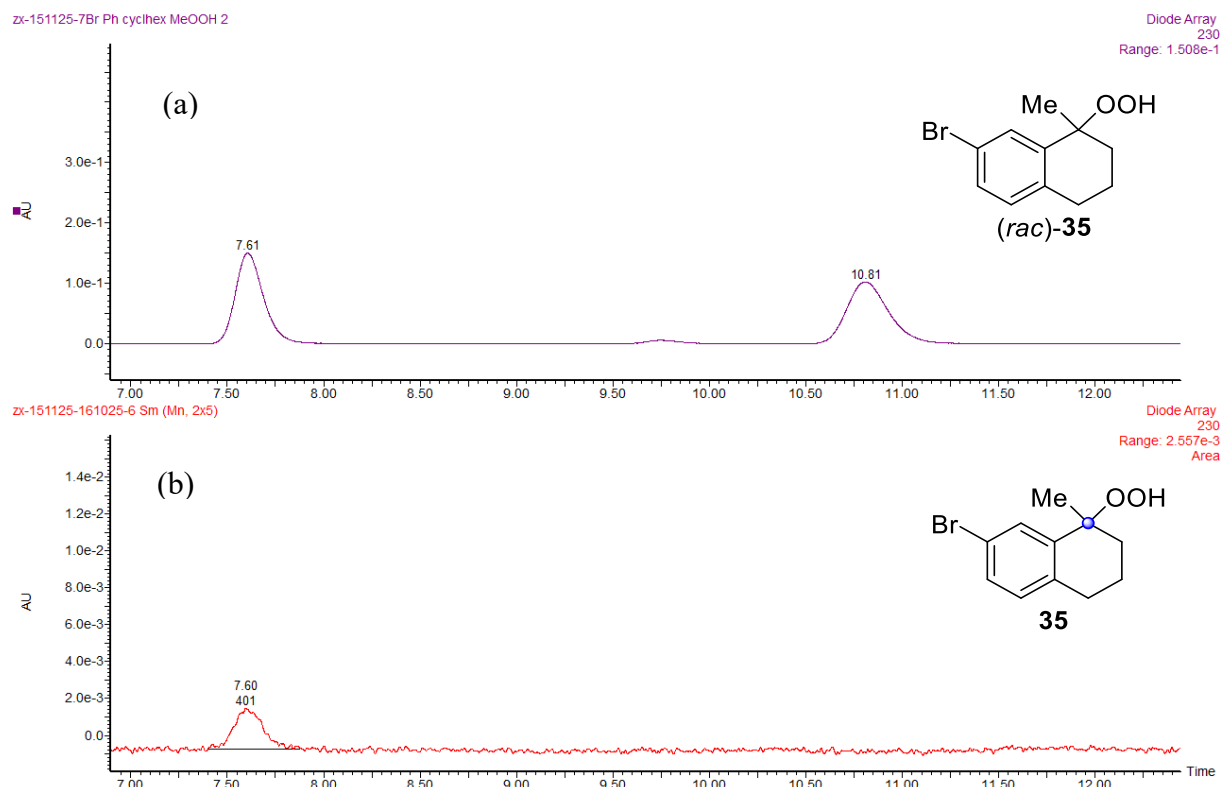

**Supplementary Fig. 30. SFC traces of hydroperoxide 35.** (a) Authentic sample of (*rac*)-hydroperoxide 35. (b) Biocatalytic reaction of alkene 1 with P450<sub>BM3</sub>\_QTG and PhSiMeH<sub>2</sub>.

### 3.9 Biocatalytic reaction of hydroperoxide **35**

#### (1) Biocatalytic reaction using hydroperoxide **35** as substrate with P450<sub>BM3</sub>-QTG and PhSiMeH<sub>2</sub>

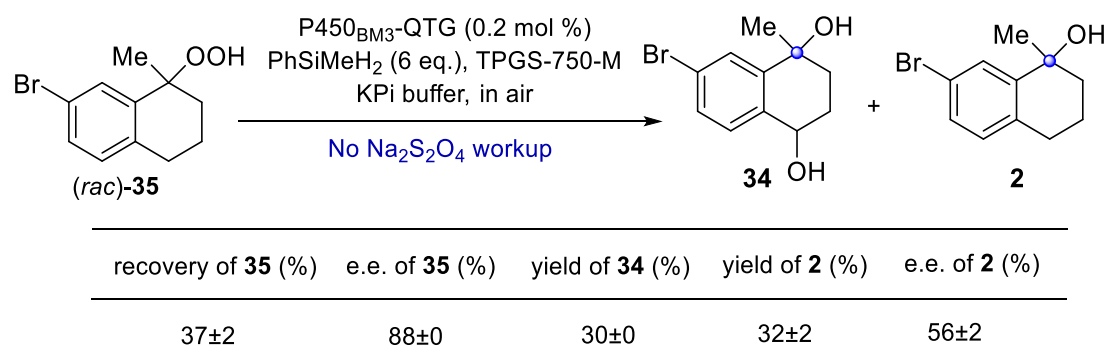

#### Supplementary Fig. 31. Biocatalytic reaction of racemic hydroperoxide **35** with P450<sub>BM3</sub>-QTG and PhSiMeH<sub>2</sub>

**Experimental procedure:** A glass vial (2 mL) was charged successively with purified P450<sub>BM3</sub>-QTG (356 µL, KPi buffer (50 mM, pH 7.0), 0.2 mol% biocatalyst loading), TPGS-750-M (40 µL, from 4 wt% in H<sub>2</sub>O stock solution) and the racemic hydroperoxide **35** (2.0 µL of 200 mM in DMSO). The vial was incubated in a thermoshaker (5 min, 25 °C, shaken at 600 rpm). Next, PhSiMeH<sub>2</sub> (2 µL of 25% v/v in DMSO) was added, and the reaction was placed in a thermoshaker (12 h, 25 °C, shaken at 600 rpm). The reaction mixture was quenched by adding ethyl acetate (containing 5 mM 1,3,5-trimethoxybenzene as internal standard, 80 µL), followed by additional ethyl acetate (320 µL). After vortexing, the mixture was centrifuged (4 °C, 17000 g, 2 min). The clear supernatant (100 µL) was transferred into a vial for SFC analysis. The recovery yield and e.e. of hydroperoxide **35**, and the yield of diol **34**, and the yield and e.e. of tetralol **2** were determined by SFC analysis and collected in the **Supplementary Fig. 31**. This result confirms the occurrence of a kinetic resolution process of hydroperoxide **35** in the biocatalytic radical alkene hydration, resulting in the formation of diol **34** and the enantioenrichment of tetralol **2**.

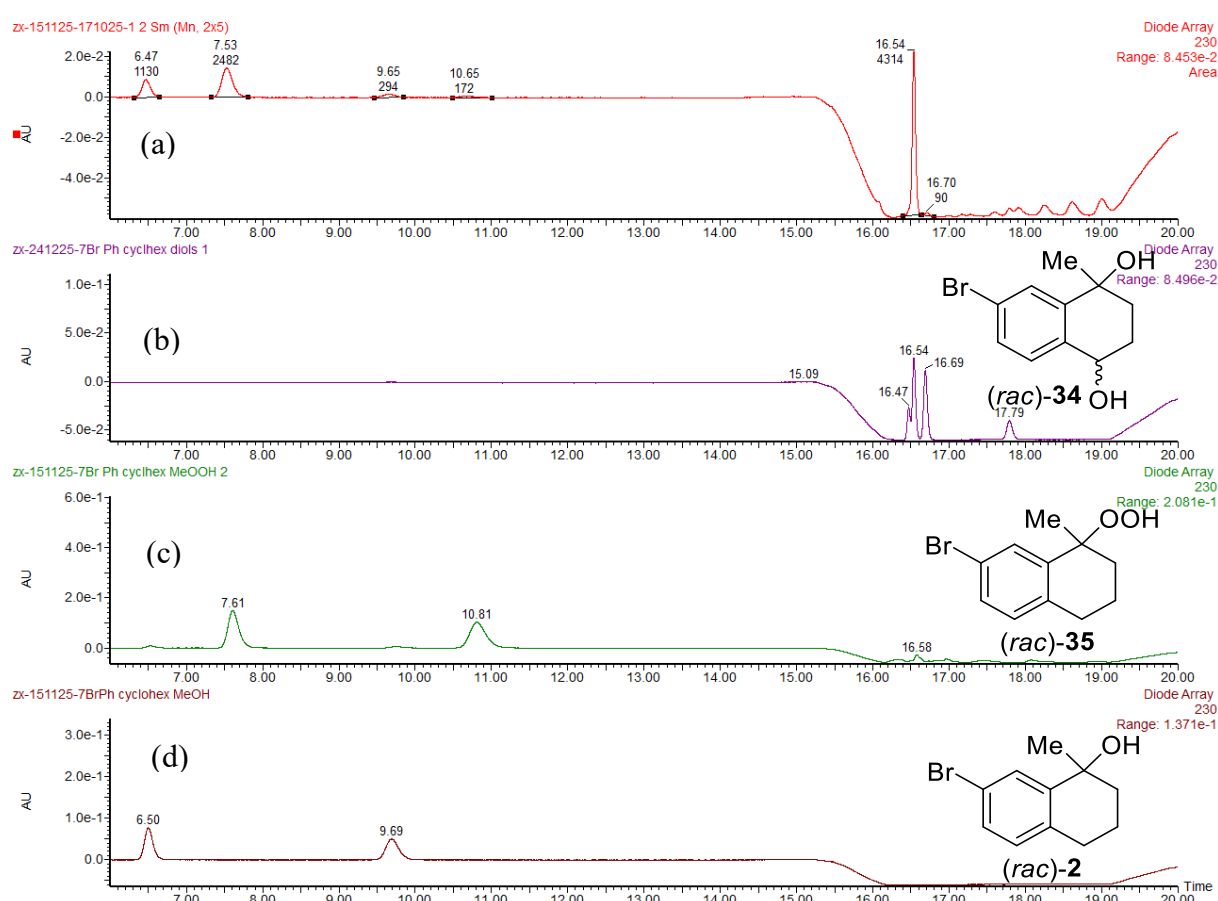

**Supplementary Fig. 32. SFC traces.** (a) Biocatalytic reaction of (*rac*)-hydroperoxide **35** with P450<sub>BM3</sub>\_QTG and PhSiMeH<sub>2</sub>. (b) Authentic sample of (*rac*)-diol **34**. (c) Synthesized (*rac*)-hydroperoxide **35**. (d) Synthesized (*rac*)-tetralol **2**.

## (2) Biocatalytic reaction using hydroperoxide **35** as substrate with P450<sub>BM3</sub>\_QTG alone

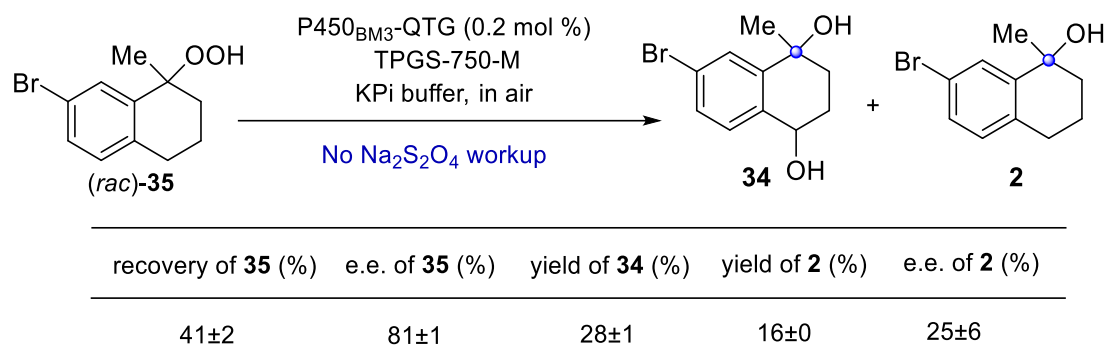

### Supplementary Fig. 33. Biocatalytic reaction of racemic hydroperoxide **35** with P450<sub>BM3</sub>\_QTG alone

**Experimental procedure:** A glass vial (2 mL) was charged successively with purified P450<sub>BM3</sub>\_QTG (356  $\mu$ L, KPi buffer (50 mM, pH 7.0), 0.2 mol% biocatalyst loading), TPGS-750-M (40  $\mu$ L, from 4 wt% in H<sub>2</sub>O stock solution) and the *(rac)*-hydroperoxide **35** (2.0  $\mu$ L of 200 mM in DMSO). The vial was incubated in a thermoshaker (12 h, 25  $^{\circ}$ C, shaken at 600 rpm). The reaction mixture was quenched by adding ethyl acetate (containing 5 mM 1,3,5-trimethoxybenzene as internal standard, 80  $\mu$ L), followed by additional ethyl acetate (320  $\mu$ L). After vortexing, the mixture was centrifuged (4  $^{\circ}$ C, 17000 g, 2 min). The clear supernatant (100  $\mu$ L) was transferred into a vial for SFC analysis. The recovery yield and e.e. of hydroperoxide **35**, and the yield of diol **34**, and the yield and e.e. of tetraol **2** were determined by SFC analysis and collected in the **Supplementary Fig. 33**. This result confirms the Fe–H species is *not* involved in the hydroxylation process and the P450<sub>BM3</sub>\_QTG can function as a peroxygenase in the presence of the hydroperoxide **35** which is formed during the biocatalytic alkene hydration of substrate **1**.

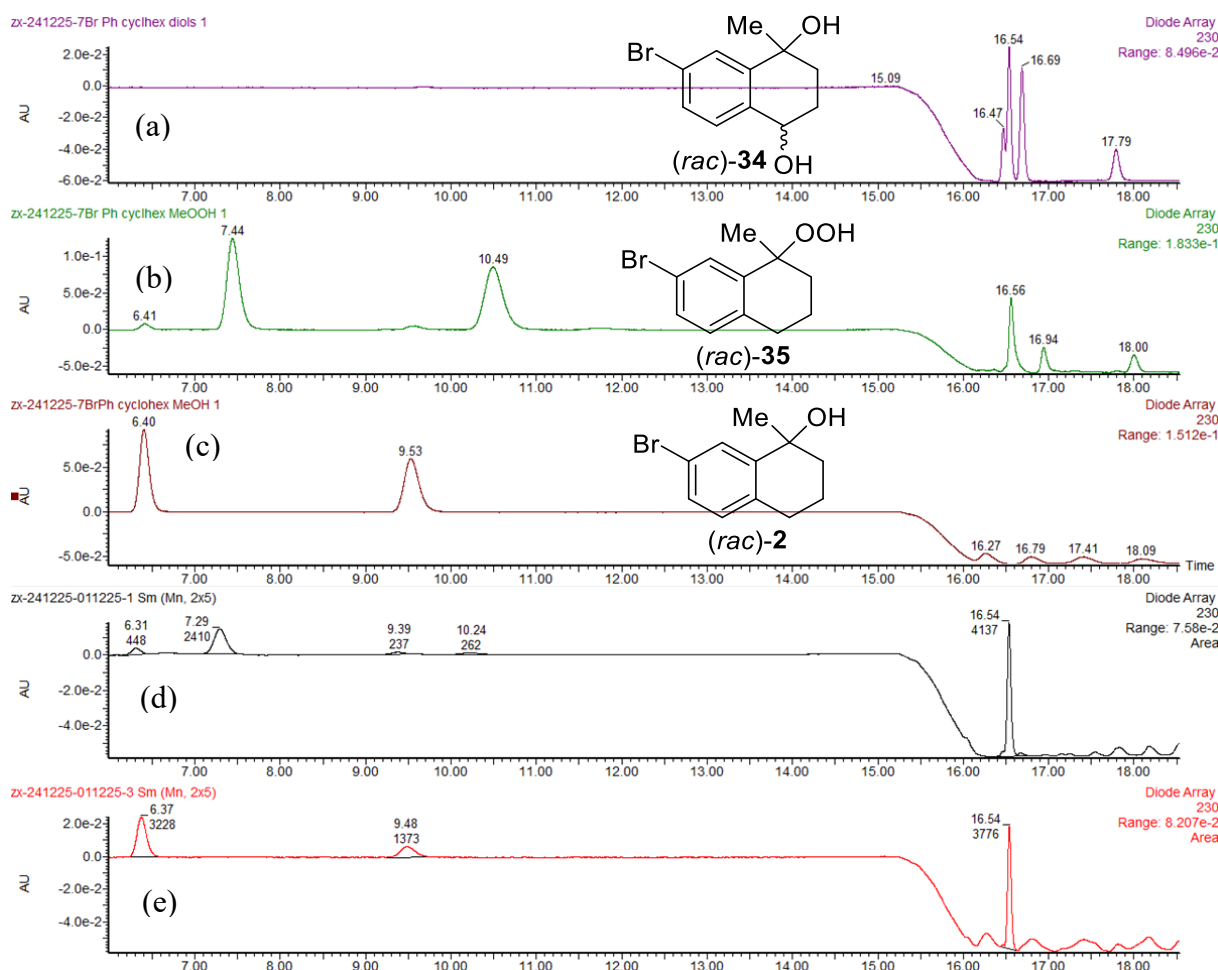

**Supplementary Fig. 34. SFC traces.** (a) Authentic sample of (*rac*)-diol **34**. (b) Synthesized (*rac*)-peroxide **34**. (c) Synthesized (*rac*)-tetralol **2**. (d) Biocatalytic reaction of (*rac*)-hydroperoxide **35** with P450<sub>BM3</sub>\_QTG in the absence of added Na<sub>2</sub>S<sub>2</sub>O<sub>4</sub> prior to workup. (e) Biocatalytic reaction of (*rac*)-hydroperoxide **35** with P450<sub>BM3</sub>\_QTG with Na<sub>2</sub>S<sub>2</sub>O<sub>4</sub> during workup, suggesting the preferred hydroxylation of (*R*)-**35** in the kinetic resolution process leading to the enrichment of (*S*)-**2**.

### (3) Determination of (*s*)-factor for the kinetic resolution in the intramolecular hydroxylation of hydroperoxide **35** catalyzed by P450<sub>BM3</sub>-QTG alone

**Experimental procedure:** To determine the selectivity factor *s*, we set out a time course reaction using (*rac*)-hydroperoxide **35** as substrate. The reaction was set up as follows: A glass vial (2 mL) was charged successively with purified P450<sub>BM3</sub>-QTG (356 μL, KPi buffer (50 mM, pH 7.0, 0.1 mol% biocatalyst loading), TPGS-750-M (40 μL, from 4 wt% in H<sub>2</sub>O stock solution) and the (*rac*)-hydroperoxide **35** (2.0 μL of 200 mM in DMSO). The reaction was performed by incubation (25 °C, shaken at 600 rpm) during the specified time. The reaction mixture was quenched by adding ethyl acetate (containing 5 mM 1,3,5-trimethoxybenzene as internal standard, 80 μL), followed by additional ethyl acetate (320 μL). After vortexing, the mixture was centrifuged (4 °C, 17000 g, 2 min). The clear supernatant (100 μL) was transferred into a vial for SFC analysis. The selectivity factor (*s*), determined based on conversion and e.e. of hydroperoxide **35**, was (*s*) = 45 for P450<sub>BM3</sub>-QTG alone (i.e. with no silane present)<sup>8</sup>. The selectivity factor (*s*) was determined based on conversion of hydroperoxide **35** (*c*) and e.e. of hydroperoxide **35** (*ee*) using the following equation:

$$s = \frac{\ln [(1 - c)(1 - ee)]}{\ln [(1 - c)(1 + ee)]}$$

**Supplementary Table 11. Determination of *s* factor for the kinetic resolution**

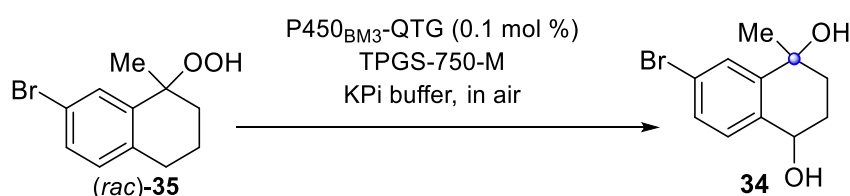

| Entry <sup>a</sup> | Reaction time | conversion of <b>35</b> (%) | e.e. of <b>35</b> (%) | average of calculated <i>s</i> |
|--------------------|---------------|-----------------------------|-----------------------|--------------------------------|
| 1                  | 15 min        | 21±2                        | 25±3                  |                                |
| 2                  | 20 min        | 23±0                        | 28±0                  | 45±4                           |
| 3                  | 60 min        | 27±3                        | 35±2                  |                                |

<sup>a</sup>Reaction conditions: (*rac*)-hydroperoxide **35** (1.0 mM), P450<sub>BM3</sub>-QTG (1 μM, 0.1 mol % catalytic loading), KPi buffer (50 mM, pH 7.0), TPGS-750-M (40 μL, 4 wt. % in H<sub>2</sub>O), V<sub>tot</sub> 400 μL, 25 °C in air, reaction time was indicated in the table. Yield and e.e. were determined by SFC using 1,3,5-trimethoxybenzene as internal standard. Reactions were performed in duplicate, and the standard deviations are listed.

#### (4) Proposed mechanism for the biocatalytic radical alkene hydration

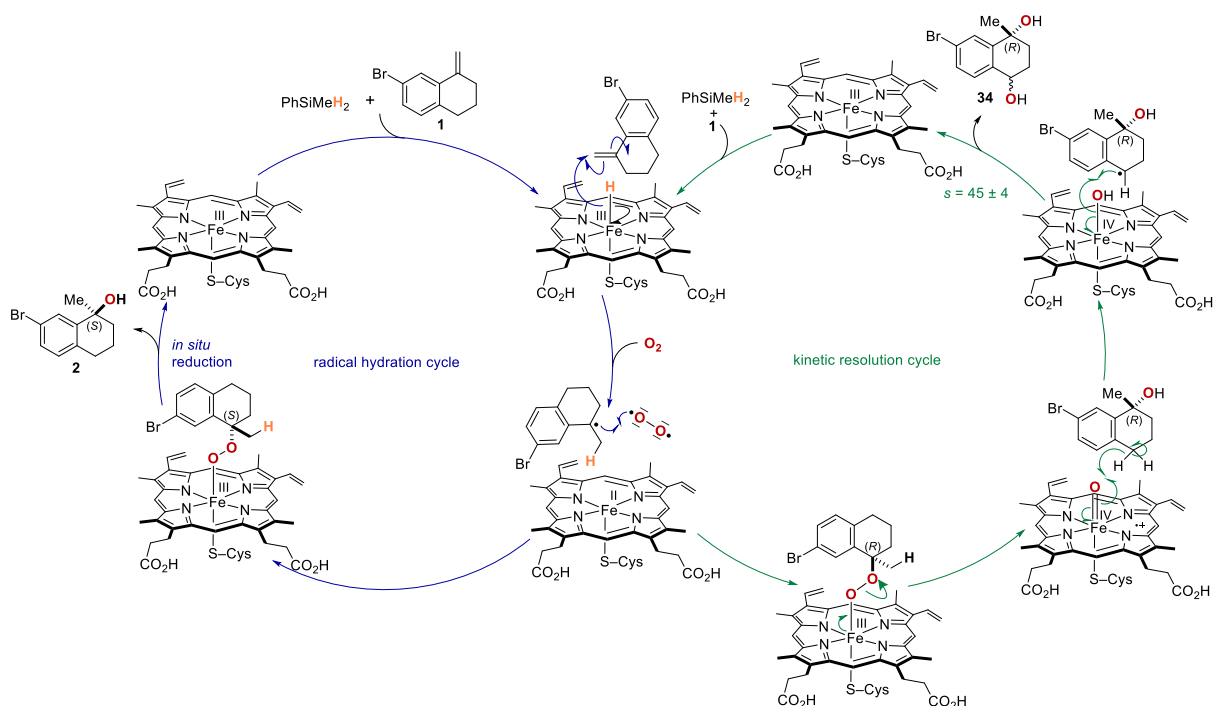

**Supplementary Fig. 35. Proposed catalytic cycle for the P450<sub>BM3</sub> asymmetric radical hydratase.** Mechanistic investigation reveals that the haemoprotein functions as a bifunctional enzyme acting both as a radical hydratase featuring an Fe–H species and as a peroxygenase involving an Fe=O ferryl species.



## 4. Genetic Information

**Cloning:** pET24a (+) was used as a cloning and expression vector for all enzymes described in this study. The gene fragment for P450<sub>BM3</sub> (with its reductase-domain deleted)<sup>9</sup> was cloned into the pET24a (+) vector using Gibson assembly. The cloned products were transformed into *E. coli* DH5α competent cells (NEB). The assembly was confirmed by Sanger sequencing (Microsynth). The assembled plasmid was isolated and transformed into *E. coli* BL21 (DE3) competent cells for protein expression. Mutagenesis libraries (**Supplementary Table 12**) were constructed using QuikChange with designed primers following the standard protocol provided by NEB.

**Supplementary Table 12. Primer sequences with introduced mutations highlighted in red.**

| Primer Name       | 5' to 3' DNA Sequences                  |
|-------------------|-----------------------------------------|
| Fw G.A. backbone  | GTATTCCTTCACCTAGCTAATAATAGGGATCCGAATTCG |
| Rev G.A. backbone | GGCATTCTCTTAATTGTCGCATTGGATTGGAAGTACA   |
| Fw Insert         | TGTACTTCCAATCCAATGCGACAATTAAAGAAATGCC   |
| Rev Insert        | CGAATTCGGATCCCTATTATTAGCTAGGTGAAGGAATAC |
| Fw F87NNK         | GAGACGGGTTANNKACAAGCTGGACGCATG          |
| Rev F87MNN        | CAGCTTGTMNNTAACCCGTCTCCTGCAAAATC        |
| Fw T268NNK        | GGACACGAANNKACAAGTGGTCTTTTATCATTTGC     |
| Rev T268MNN       | CCACTTGTMNNTTCGTGTCCCGCAATTAAG          |
| Fw A74NNK         | AGTCAANNKCTTAAATTTGTACGTGATTTTGC        |
| Rev A74MNN        | TTAAGMNNTTGACTTAAGTTTTTATCAAAGCG        |
| Fw I263NNK        | TTCTTANNKGCGGGACACGAAAC                 |
| Rev I263MNN       | GCMNNTAAGAATGTAATAATTTGATAGCG           |

**Plate screening:** The obtained DNA product was transformed into *E. coli* BL21 (DE3) competent cells for protein expression in 96 deep-well plate. The single colonies were cultured in LB media (supplemented with 50 µg/mL kanamycin) (37 °C, 300 rpm, overnight). The overnight culture (10 µL) was used to inoculate a 1 mL main culture (ZYP auto-induction medium, supplemented with 200 µg/mL kanamycin, 100 µL trace element (1000X stock solution), 0.5 mM 5'-aminolevulinic acid and 1 µg/mL thiamine pyrophosphate) in 96 deep-well plates (20 °C, 300 rpm for 24 h). The cells were harvested by centrifugation (4 °C, 4400 rpm, 20 min) and the medium was discarded. The cell pellet was immediately used for catalysis.

**Transformation and expression:** The top hits were verified by Sanger sequencing (Microsynth) and transformed into *E. coli* BL21 (DE3) competent cells for protein expression. The single colonies were cultured in LB media (supplemented with 50 µg/mL kanamycin) (37 °C, 300 rpm, overnight). The overnight culture (1.0 mL) was used to inoculate a 100 mL

main culture (ZYP auto-induction medium, supplemented with 200 µg/mL kanamycin, 100 µL of trace element (1000X stock solution), 0.5 mM 5'-aminolevulinic acid and 1 µg/mL thiamine pyrophosphate) in a 500 mL baffled flask (20 °C, 180 rpm for 36 h). The cells were harvested by centrifugation (4 °C, 4400 rpm, 20 min) and the supernatant was discarded. The cells were frozen at –20 °C for long term storage and purification.

**Protein purification:** The isolated cell pellets were thawed and resuspended in the loading buffer (50 mM NaPi, 250 mM NaCl, 10 mM imidazole, pH 8.0). The resuspended solution was lysed on ice by sonication (5 min, amplitude 50, 5 seconds on, 10 seconds off). The cell-free extract (CFE) was obtained by centrifugation (4 °C, 8000 rpm, 30 min). The column packed with the Ni-NTA beads was washed with MQ water (5X column volume), and then equilibrated with the loading buffer (5X column volume). The cell-free-extract was then loaded onto the column and washed with the loading buffer (30X column volume). The protein was eluted with the elution buffer (50 mM NaPi, 250 mM NaCl, 250 mM imidazole, pH 8.0) (4X column volume). The eluted protein solution was buffer-exchanged into KPi buffer (pH 7.0, 50 mM) by PD-10 column. The desalted protein solution was divided into 1 mL aliquots and flash-frozen with liquid nitrogen for storage. The concentration of variants was determined by the haemchrome assay using UV-Vis spectroscopy<sup>10,11</sup>.

**Supplementary Table 13. Amino acid and DNA sequences of the evolved P450<sub>BM3</sub>\_QTG (haem domain) variant with mutations (i.e. A74Q, F87T and T268G) highlighted in red.**

| Amino acid sequence                                                                                                                                                                                                                                                                                                                                                                                                                                                                                                                  |
|--------------------------------------------------------------------------------------------------------------------------------------------------------------------------------------------------------------------------------------------------------------------------------------------------------------------------------------------------------------------------------------------------------------------------------------------------------------------------------------------------------------------------------------|
| MGSHHHHHHSGSGGENLYFQSNATIKEMPQPKTFGELKNLPLLNTDKPVQALMKI<br>ADELGEIFKFEAPGRVTRYLSSQRLIKEACDESRFDKNLSQQLKFVRDFAGDGLTTS<br>WTHEKNWKKAHNILLPSFSQQAMKGYHAMMVDIAVQLVQKWERLNADEHIEVP<br>EDMTRLTLDTIGLCGFNYRFNSFYRDQPHPFITSMVRALDEAMNKLQRANPDDPA<br>YDENKRQFQEDIKVMNDLVDKIIADRKASGEQSDDLTHMLNGKDPETGEPLDDE<br>NIRYQIITFLIAGHEGTSGLLSFALYFLVKNPHVLQKAAEEAARVLVDPVPSYKQVK<br>QLKYVGMVLNEALRLWPTAPAFSLYAKEDTVLGGEYPLEKGDELMVLIPQLHRD<br>KTIWGDDVEEFRPERFENPSAIPQHAFKPFNGQRACIGQQFALHEATLVLGMMLK<br>HFD FEDHTNYELDIKETLTLKPEGFVVKAKSKKIPLGGIPSPS |
| DNA sequence                                                                                                                                                                                                                                                                                                                                                                                                                                                                                                                         |
| ATGGGTAGCCACCATCACCATCACCATGGGAGTGGTTCTGGTGAAAACCTGTA<br>CTTCCAATCCAATGCGACAATTAAAGAAATGCCTCAGCCAAAAACGTTTGGAG<br>AGCTTAAAAATTTACCGTTATTAAACACAGATAAACCGGTTCAAGCTTTGATGA                                                                                                                                                                                                                                                                                                                                                             |

AAATTGCGGATGAATTAGGAGAAATCTTTAAATTCGAGGCGCCTGGTCGTGTA  
ACGCGCTACTTATCAAGTCAGCGTCTAATTAAAGAAGCATGCGATGAATCACG  
CTTTGATAAAAACTTAAGTCAAACCTTAAATTTGTACGTGATTTTGCAGGAGA  
CGGGTTAACTACAAGCTGGACGCATGAAAAAAATTGGAAAAAAGCGCATAATA  
TCTTACTTCCAAGCTTCAGTCAGCAGGCAATGAAAGGCTATCATGCGATGATGG  
TCGATATCGCCGTGCAGCTTGTTCAAAAGTGGGAGCGTCTAAATGCAGATGAG  
CATATTGAAGTACCGGAAGACATGACACGTTTAACGCTTGATACAATTGGTCTT  
TGCGGCTTTAACTATCGCTTTAACAGCTTTTACCGAGATCAGCCTCATCCATTTA  
TTACAAGTATGGTCCGTGCACTGGATGAAGCAATGAACAAGCTGCAGCGAGCA  
AATCCAGACGACCCAGCTTATGATGAAAACAAGCGCCAGTTTCAAGAAGATAT  
CAAGGTGATGAACGACCTAGTAGATAAAATTATTGCAGATCGCAAAGCAAGCG  
GTGAACAAAGCGATGATTTATTAACGCATATGCTAAACGGAAAAGATCCAGAA  
ACGGGTGAGCCGCTTGATGACGAGAACATTCGCTATCAAATTATTACATTCTTA  
ATTGCGGGACACGAAAGGACAAGTGGTCTTTTATCATTGCGCTGTATTTCTTA  
GTGAAAAATCCACATGTATTACAAAAAGCAGCAGAAGAAGCAGCACGAGTTCT  
AGTAGATCCTGTTCCAAGCTACAAACAAGTCAAACAGCTTAAATATGTCGGCA  
TGGTCTTAAACGAAGCGCTGCGCTTATGGCCAACTGCTCCTGCGTTTTCCCTAT  
ATGCAAAAGAAGATACGGTGCTTGGAGGAGAATATCCTTTAGAAAAAGGCGAC  
GAACTAATGGTTCTGATTCCTCAGCTTCACCGTGATAAAACAATTTGGGGAGAC  
GATGTGGAAGAGTTCCGTCCAGAGCGTTTTGAAAATCCAAGTGCGATTCCGCA  
GCATGCGTTTAAACCGTTTGGAAACGGTCAGCGTGCGTGTATCGGTCAGCAGTT  
CGCTCTTCATGAAGCAACGCTGGTACTTGGTATGATGCTAAAACACTTTGACTT  
TGAAGATCATACAACTACGAGCTCGATATTAAAGAACTTTAACGTTAAAC  
CTGAAGGCTTTGTGGTAAAAGCAAAATCGAAAAAAATTCCGCTTGGCGGTATT  
CCTTCACCTAGCTAA

## 5. General catalytic procedures

**General procedure for the biocatalytic radical alkene hydration with whole cells used during the directed evolution campaign:** The cell pellet was resuspended in KPi buffer (400  $\mu$ L, pH 7.0, 50 mM). The resulting whole-cell solution (354  $\mu$ L) was transferred in a glass-coated 96 deep-well plate, followed by successive addition of TPGS-750-M (40  $\mu$ L, from 2 wt% in H<sub>2</sub>O as stock solution) and the alkene **1** (2.0  $\mu$ L of 200 mM in DMSO). The plate was sealed and incubated in a thermoshaker (5 min, 25 °C, shaken at 600 rpm). Next, PhSiH<sub>3</sub> (2  $\mu$ L of 50% v/v in DMSO, 20 equivalents vs. alkene **1**) was added and the plate was sealed. The reaction was placed in a thermoshaker (24 h, 25 °C, shaken at 600 rpm). The reaction was quenched by adding ethyl acetate (containing 5 mM 1,3,5-trimethoxybenzene as internal standard, 80  $\mu$ L), followed by additional ethyl acetate (320  $\mu$ L). After vortexing, the mixture was centrifuged (4 °C, 17000 g, 10 min). The clear supernatant (100  $\mu$ L) was transferred into a vial for SFC analysis. The yield and e.r. were determined by SFC analysis.

**General procedure for the biocatalytic radical alkene hydration using purified protein under standard conditions:** A glass vial (2 mL) was charged successively with purified P450<sub>BM3</sub>\_QTG (0.2 mol% biocatalyst loading, in KPi buffer (pH 7.0, 50 mM), 354  $\mu$ L), TPGS-750-M (40  $\mu$ L, from 4 wt% in H<sub>2</sub>O stock solution) and the alkene substrate (2.0  $\mu$ L of 200 mM in DMSO). The vial was placed in a thermoshaker (5 min, 25 °C, shaken at 600 rpm). Next, PhSiMeH<sub>2</sub> (2  $\mu$ L of 25% v/v in DMSO, 6 equivalents vs. alkene substrate) was added and the vial was sealed. The reaction was carried out in a thermoshaker (12 h, 25 °C, shaken at 600 rpm). The reaction mixture was quenched by adding aq. Na<sub>2</sub>S<sub>2</sub>O<sub>4</sub> (10  $\mu$ L, from 0.5 M in H<sub>2</sub>O stock solution), and was further incubated in a thermoshaker (10 min, 25 °C, shaken at 600 rpm). The resulting mixture was diluted with ethyl acetate (containing 5 mM 1,3,5-trimethoxybenzene as internal standard, 80  $\mu$ L), followed by addition of ethyl acetate (320  $\mu$ L). After vortexing, the mixture was centrifuged (4 °C, 17000 g, 2 min). The clear supernatant (100  $\mu$ L) was transferred into a vial for SFC analysis. The yield and e.r. were determined by SFC analysis.

## 6. Synthesis and characterization of substrates and products

### 6.1 Synthesis and characterization of alkene substrates

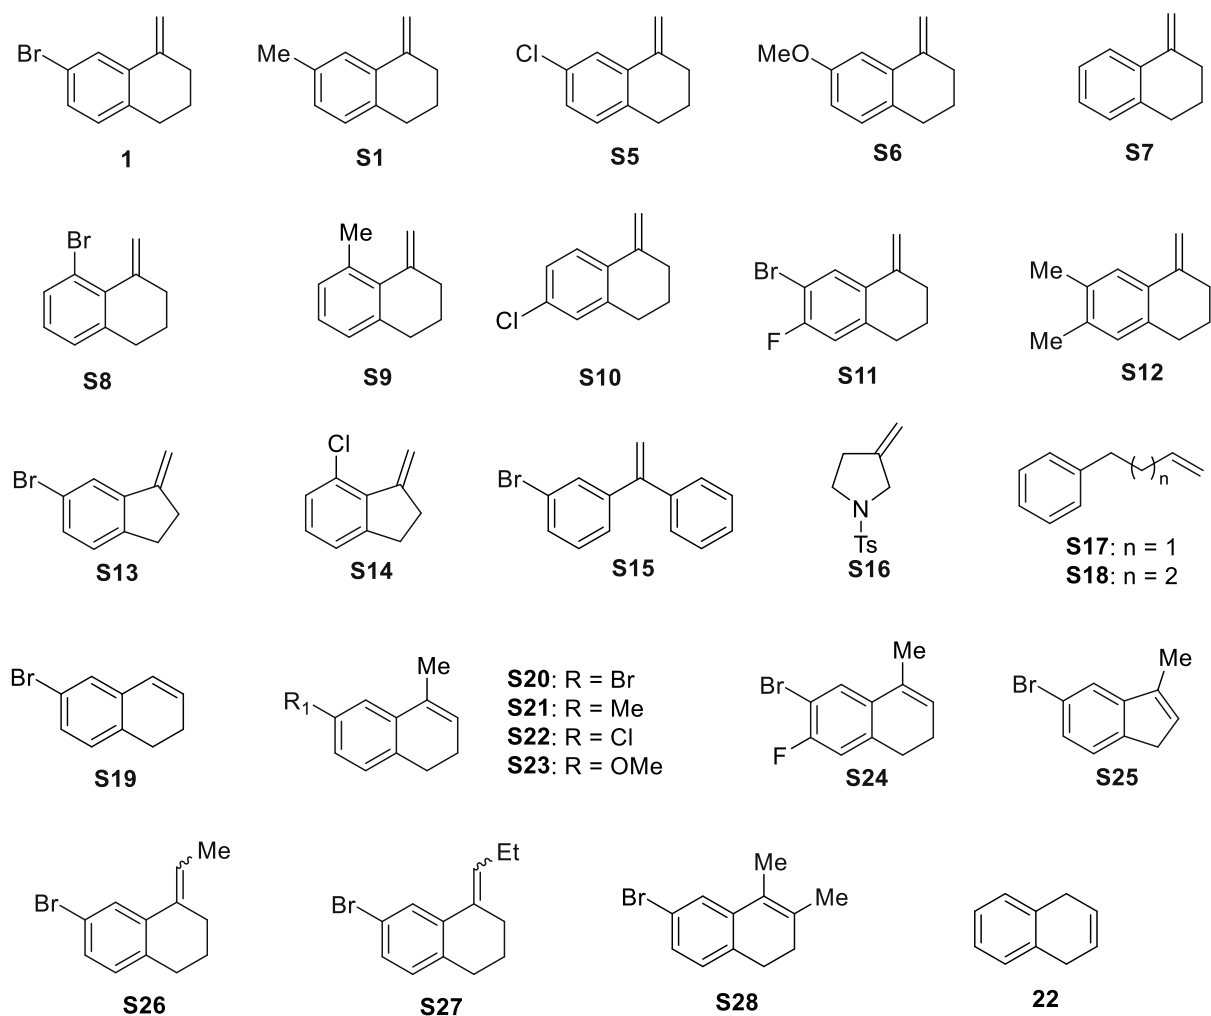

Supplementary Fig. 36. Substrates evaluated in the biocatalytic radical alkene hydration.

**(1) General synthetic procedure A for the synthesis of the alkene substrates synthesis (1, S1, S5-16 and S26-27)**

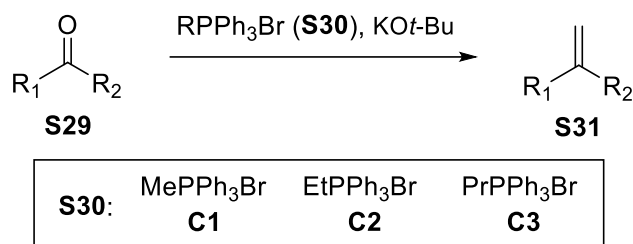

**Supplementary Fig. 37. General synthetic route A.**

The ketone compounds used for the synthesis of the corresponding alkenes are all commercially available.

**General synthetic procedure A:** To a stirred solution of bromide **S30** (1.1 eq.) in dry THF (0.2 M),  $\text{KO}^t\text{Bu}$  (1.1 eq.) was slowly added at 22 °C. The reaction mixture was stirred for 30 min, before slowly adding the ketone **S29** (1.0 eq., 0.5 M in THF) at 22 °C. The reaction mixture was stirred for 2 h, before quenching with saturated  $\text{NaHCO}_3$ . The mixture was extracted with diethyl ether, and the combined organic phases were dried over anhydrous  $\text{Na}_2\text{SO}_4$  and filtered. The solvent was evaporated under vacuum, and the residue was subjected to flash chromatography using diethyl ether /petroleum ether to afford the alkene **S31**.

**(2) General synthetic procedure B for the synthesis of alkene substrates (S20-25)**

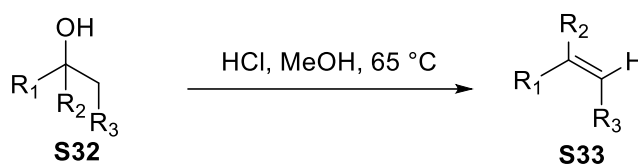

**Supplementary Fig. 38. General synthetic route B.**

The corresponding alcohol compounds used in the synthesis were prepared according to general procedure **D** (see below).

**General synthetic procedure B:** The synthesis was carried out according to a reported procedure<sup>12</sup>. To a stirred solution of alcohol **S32** (1.0 eq.) in THF (0.2 M), conc. HCl (2.0 eq.) was added at 22 °C. The reaction mixture was refluxed for 3 h before quenching with saturated NaHCO<sub>3</sub>. The mixture was extracted with diethyl ether, and the combined organic phases were dried over anhydrous Na<sub>2</sub>SO<sub>4</sub> and filtered. The solvent was evaporated under vacuum, and the residue was subjected to flash chromatography using diethyl ether /petroleum ether to afford the alkene **S33**.

### (3) General synthetic procedure C for the synthesis of alkene substrates (S19 and S28)

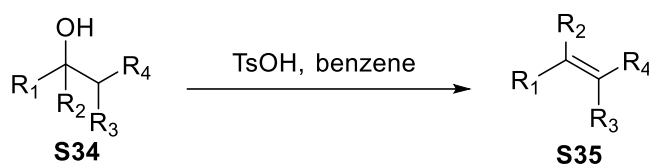

#### Supplementary Fig. 39. General synthetic route C.

The corresponding alcohol compound used in the synthesis was either commercially available (for **S19**) or prepared according to the synthetic procedure listed in **Supplementary Fig. 42** (for **S28**).

**General synthetic procedure C:** The synthesis was carried out according to a modified procedure<sup>13</sup>. To a stirred solution of alcohol **S34** (1.0 eq.) in benzene (0.2 M), *p*-toluenesulfonic acid (0.1 eq.) was added at 22 °C. The reaction mixture was refluxed for 12 h before quenching with saturated NaHCO<sub>3</sub>. The mixture was extracted with diethyl ether, and the combined organic phases were dried over anhydrous Na<sub>2</sub>SO<sub>4</sub> and filtered. The solvent was evaporated under vacuum, and the residue was subjected to flash chromatography using petroleum ether to afford the alkene **S35**.



#### (4) Characterization of the alkene substrates

The spectral of the synthesized alkene substrates **1** and **S13**<sup>14</sup>, **S5**<sup>15</sup>, **S6** and **S7**<sup>16</sup>, **S8** and **S10**<sup>17</sup>, **S15**<sup>18</sup>, **S16**<sup>19</sup>, **S19**<sup>13</sup>, **S20**<sup>20</sup>, **S23**<sup>21</sup> and **S25**<sup>22</sup> are identical to the reported data. Alkenes **S17**, **S18** and **22** are commercially available and were used without further purification.

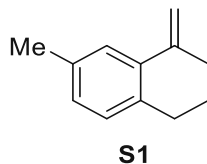

The alkene **S1** was prepared according to the general procedure **A**, 86% yield. <sup>1</sup>H NMR (500 MHz, CDCl<sub>3</sub>) δ 7.46 (s, 1H), 7.01–6.97 (m, 2H), 5.49–5.43 (m, 1H), 4.95–4.91 (m, 1H), 2.81 (t, J = 6.3 Hz, 2H), 2.56–2.50 (m, 2H), 2.32 (s, 3H), 1.90–1.83 (m, 2H) ppm; <sup>13</sup>C NMR (126 MHz, CDCl<sub>3</sub>) δ 143.7, 135.3, 134.6, 134.5, 129.2, 128.7, 124.7, 107.7, 33.5, 30.2, 24.1, 21.3 ppm; HRMS (m/z): [M+H]<sup>+</sup> calcd for C<sub>12</sub>H<sub>15</sub><sup>+</sup> 159.1168, found 159.1168.

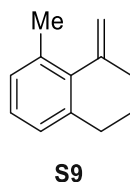

The alkene **S9** was prepared according to the general procedure **A**, 82% yield. <sup>1</sup>H NMR (500 MHz, CD<sub>2</sub>Cl<sub>2</sub>) δ 7.09–7.00 (m, 2H), 6.98–6.92 (m, 1H), 5.28 (q, J = 1.5 Hz, 1H), 5.11–5.08 (m, 1H), 2.72 (t, J = 6.6 Hz, 2H), 2.48 (tt, J = 6.9, 1.2 Hz, 2H), 2.45 (s, 3H), 1.89–1.81 (m, 2H) ppm; <sup>13</sup>C NMR (126 MHz, CDCl<sub>3</sub>) δ 144.1, 139.7, 137.0, 135.1, 129.3, 126.7, 126.1, 114.0, 34.1, 30.5, 24.2, 22.0 ppm; GCMS (m/z): [M]<sup>+</sup> calcd for C<sub>12</sub>H<sub>14</sub><sup>+</sup> 158.109, found 158.100.

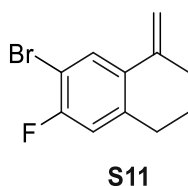

The alkene **S11** was prepared according to the general procedure **A**, 84% yield. <sup>1</sup>H NMR (500 MHz, CDCl<sub>3</sub>) δ 7.78 (d, J = 7.0 Hz, 1H), 6.85 (dt, J = 9.2, 1.0 Hz, 1H), 5.38 (s, 1H), 5.00–4.93 (m, 1H), 2.81–2.72 (m, 2H), 2.54–2.47 (m, 2H), 1.91–1.81 (m, 2H) ppm. <sup>13</sup>C NMR (126 MHz, CDCl<sub>3</sub>) δ 158.26 (d, J = 248.0 Hz), 141.55 (d, J = 1.6 Hz), 138.83 (d, J = 6.6 Hz), 132.69 (d, J = 3.6 Hz), 129.45 (d, J = 1.0 Hz), 116.45 (d, J = 21.6 Hz), 108.89 (d, J = 2.2 Hz), 106.47 (d, J = 21.4 Hz), 32.81, 30.33 (d, J = 1.5 Hz), 23.40 ppm. GCMS (m/z): [M]<sup>+</sup> calcd for C<sub>11</sub>H<sub>10</sub>BrF<sup>+</sup> 239.994, found 240.000.

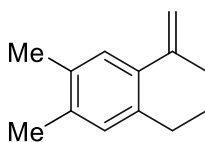

**S12**

The alkene **S12** was prepared according to the general procedure **A**, 80% yield.  $^1\text{H}$  NMR (600 MHz,  $\text{CD}_2\text{Cl}_2$ )  $\delta$  7.40 (s, 1H), 6.87 (s, 1H), 5.41 (s, 1H), 4.86 (s, 1H), 2.75 (t,  $J$  = 6.3 Hz, 2H), 2.57–2.44 (m, 2H), 2.22 (s, 3H), 2.21 (s, 3H), 1.86–1.78 (m, 2H) ppm.  $^{13}\text{C}$  NMR (151 MHz,  $\text{CD}_2\text{Cl}_2$ )  $\delta$  144.1, 136.7, 135.2, 134.4, 132.3, 130.5, 125.3, 106.5, 33.8, 30.3, 24.5, 19.6, 19.5 ppm. GCMS ( $m/z$ ):  $[\text{M}]^+$  calcd for  $\text{C}_{13}\text{H}_{16}^+$  172.125, found 172.100.

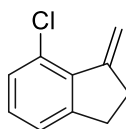

**S14**

The alkene **S14** was prepared according to the general procedure **A**, 87% yield.  $^1\text{H}$  NMR (500 MHz,  $\text{CD}_2\text{Cl}_2$ )  $\delta$  7.22–7.09 (m, 3H), 6.12–6.06 (m, 1H), 5.31–5.28 (m, 1H), 2.99–2.94 (m, 2H), 2.86–2.80 (m, 2H) ppm.  $^{13}\text{C}$  NMR (126 MHz,  $\text{CD}_2\text{Cl}_2$ )  $\delta$  150.7, 149.4, 137.1, 130.5, 129.2, 128.7, 124.2, 109.4, 33.3, 30.5 ppm. GCMS ( $m/z$ ):  $[\text{M}]^+$  calcd for  $\text{C}_{10}\text{H}_9^+$  164.039, found 164.000.

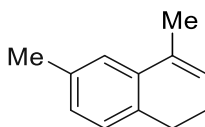

**S21**

The alkene **S21** was prepared according to the general procedure **B**, 85% yield.  $^1\text{H}$  NMR (500 MHz,  $\text{CD}_2\text{Cl}_2$ )  $\delta$  7.08–7.04 (m, 1H), 7.02 (d,  $J$  = 7.5 Hz, 1H), 6.96 (dd,  $J$  = 7.5, 1.1 Hz, 1H), 5.86 (tq,  $J$  = 4.6, 1.5 Hz, 1H), 2.71 (t,  $J$  = 8.2 Hz, 2H), 2.33 (s, 3H), 2.25–2.20 (m, 2H), 2.05 (q,  $J$  = 1.8 Hz, 3H) ppm.  $^{13}\text{C}$  NMR (126 MHz,  $\text{CD}_2\text{Cl}_2$ )  $\delta$  136.05, 136.03, 133.67, 132.64, 127.52, 127.49, 125.75, 123.98, 28.30, 23.81, 21.40, 19.49 ppm. GCMS ( $m/z$ ):  $[\text{M}]^+$  calcd for  $\text{C}_{12}\text{H}_{14}^+$  158.109, found 158.100.

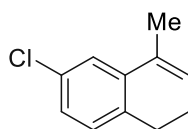

**S22**

The alkene **S22** was prepared according to the general procedure **B**, 90% yield.  $^1\text{H}$  NMR (600 MHz,  $\text{CD}_2\text{Cl}_2$ )  $\delta$  7.19 (d,  $J$  = 2.5 Hz, 1H), 7.10 (dd,  $J$  = 7.9, 2.4 Hz, 1H), 7.07 (d,  $J$  = 8.0 Hz, 1H), 5.95–5.90 (m, 1H), 2.71 (t,  $J$  = 8.1 Hz, 2H), 2.29–2.19 (m, 2H), 2.07–1.98 (m, 3H) ppm.

$^{13}\text{C}$  NMR (151 MHz,  $\text{CD}_2\text{Cl}_2$ )  $\delta$  138.0, 135.2, 132.1, 131.7, 128.9, 127.3, 126.6, 123.2, 27.9, 23.5, 19.3 ppm. GCMS (m/z):  $[\text{M}]^+$  calcd for  $\text{C}_{11}\text{H}_{11}^+$  178.054, found 178.000.

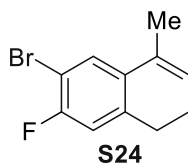

The alkene **S24** was prepared according to the general procedure **B**, 88% yield.  $^1\text{H}$  NMR (600 MHz,  $\text{CD}_2\text{Cl}_2$ )  $\delta$  7.36 (d,  $J = 7.0$  Hz, 1H), 6.92 (d,  $J = 9.0$  Hz, 1H), 5.90–5.84 (m, 1H), 2.70 (t,  $J = 8.1$  Hz, 2H), 2.29–2.18 (m, 2H), 2.01 (s, 3H) ppm.  $^{13}\text{C}$  NMR (151 MHz,  $\text{CD}_2\text{Cl}_2$ )  $\delta$  157.8 (d,  $J = 245.7$  Hz), 138.7 (d,  $J = 6.6$  Hz), 134.1 (d,  $J = 3.6$  Hz), 130.9 (d,  $J = 1.9$  Hz), 127.8, 126.3 (d,  $J = 2.2$  Hz), 115.8 (d,  $J = 22.4$  Hz), 105.8 (d,  $J = 20.7$  Hz), 28.3 (d,  $J = 1.7$  Hz), 23.1, 19.4 ppm. GCMS (m/z):  $[\text{M}]^+$  calcd for  $\text{C}_{11}\text{H}_{10}\text{BrF}^+$  239.994, found 240.000.

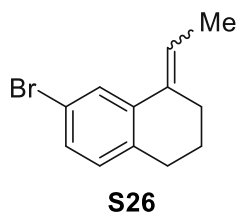

The alkene **S26** was prepared according to the general procedure **A**, 86% yield, along with a pair of inseparable *Z/E* isomers (ratio = 3:1).  $^1\text{H}$  NMR (500 MHz,  $\text{CDCl}_3$ )  $\delta$  7.67 (d,  $J = 2.0$  Hz, 0.75H), 7.52 (d,  $J = 2.1$  Hz, 0.25H), 7.26 (dd,  $J = 8.1, 2.1$  Hz, 0.25H), 7.20 (dd,  $J = 8.1, 2.1$  Hz, 0.75H), 7.00 (dt,  $J = 8.1, 1.0$  Hz, 0.25H), 6.94 (dt,  $J = 8.1, 0.9$  Hz, 0.75H), 6.09 (qt,  $J = 7.0, 2.0$  Hz, 0.75H), 5.60 (qt,  $J = 7.2, 1.3$  Hz, 0.25H), 2.75 (td,  $J = 6.7, 0.9$  Hz, 0.5H), 2.68 (t,  $J = 6.2$  Hz, 1.5H), 2.49–2.43 (m, 1.5H), 2.40–2.34 (m, 0.5H), 1.93–1.77 (m, 5H) ppm.  $^{13}\text{C}$  NMR (126 MHz,  $\text{CDCl}_3$ )  $\delta$  138.7, 138.0, 137.5, 136.1, 135.3, 134.0, 131.0, 130.5, 130.4, 129.5, 129.1, 126.6, 121.6, 120.2, 119.9, 118.6, 34.3, 30.3, 29.4, 26.1, 24.2, 22.9, 15.6, 13.9 ppm. GCMS (m/z):  $[\text{M}]^+$  calcd for  $\text{C}_{12}\text{H}_{13}\text{Br}^+$  236.020, found 236.000.

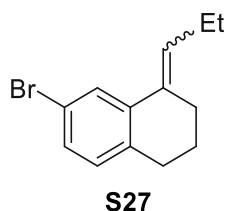

The alkene **S27** was prepared according to the general procedure **A**, 88% yield, along with a pair of inseparable *Z/E* isomers (ratio = 6.1:1).  $^1\text{H}$  NMR (500 MHz,  $\text{CDCl}_3$ )  $\delta$  7.68 (d,  $J = 2.1$  Hz, 0.86H), 7.45 (d,  $J = 2.1$  Hz, 0.14H), 7.26 (dd,  $J = 8.1, 2.1$  Hz, 0.14H), 7.20 (dd,  $J = 8.1, 2.1$  Hz, 0.86H), 7.00–6.97 (m, 0.14H), 6.96–6.90 (m, 0.86H), 5.98 (tt,  $J = 7.2, 2.0$  Hz, 0.86H), 5.43 (tt,  $J = 7.0, 1.3$  Hz, 0.14H), 2.76–2.72 (m, 0.28H), 2.69 (t,  $J = 6.2$  Hz, 1.72H), 2.50–2.43 (m,

1.72H), 2.39–2.31 (m, 0.56H), 2.24–2.15 (m, 1.72H), 1.90–1.84 (m, 0.28H), 1.83–1.75 (m, 1.72H), 1.10–1.03 (m, 3H) ppm.  $^{13}\text{C}$  NMR (126 MHz,  $\text{CDCl}_3$ )  $\delta$  138.7, 137.5, 136.2, 132.7, 130.8, 130.5, 130.3, 129.9, 129.6, 129.2, 127.9, 126.6, 119.9, 34.2, 30.2, 29.4, 26.2, 24.3, 23.1, 22.8, 21.6, 15.1, 14.1 ppm. GCMS (m/z):  $[\text{M}]^+$  calcd for  $\text{C}_{13}\text{H}_{15}\text{Br}^+$  250.035, found 250.000.

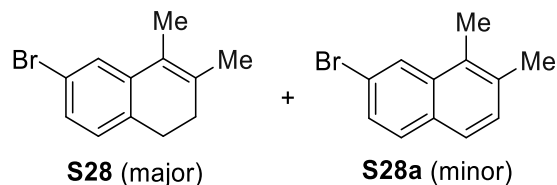

The alkene **S28** was prepared according to the general procedure **C**, 72% yield, along with the inseparable oxidized byproduct naphthalene **S28a** (**S28**:**S28a** = 6.3:1).  $^1\text{H}$  NMR (600 MHz,  $\text{CD}_2\text{Cl}_2$ )  $\delta$  8.21 (s, 0.16H), 7.68 (d,  $J$  = 8.7 Hz, 0.16H), 7.59 (d,  $J$  = 8.3 Hz, 0.16H), 7.49 (dd,  $J$  = 8.7, 2.1 Hz, 0.16H), 7.37–7.29 (m, 1.16H), 7.19 (dd,  $J$  = 7.9, 2.3 Hz, 1H), 6.97 (d,  $J$  = 7.9 Hz, 1H), 2.66 (t,  $J$  = 8.0 Hz, 2H), 2.55 (s, 0.48H), 2.48 (s, 0.48H), 2.21 (t,  $J$  = 7.4 Hz, 2H), 1.98 (s, 3H), 1.92 (s, 3H) ppm.  $^{13}\text{C}$  NMR (151 MHz,  $\text{CD}_2\text{Cl}_2$ )  $\delta$  139.80, 135.00, 134.77, 134.66, 134.41, 131.03, 130.96, 130.44, 129.90, 128.81, 128.33, 128.02, 126.60, 125.84, 125.71, 124.49, 120.23, 120.22, 30.75, 28.15, 20.95, 20.54, 14.70, 14.28 ppm. GCMS (m/z):  $[\text{M}]^+$  calcd for  $\text{C}_{12}\text{H}_{13}\text{Br}^+$  236.020, found 236.000.

## 6.2 Synthesis and characterization of products

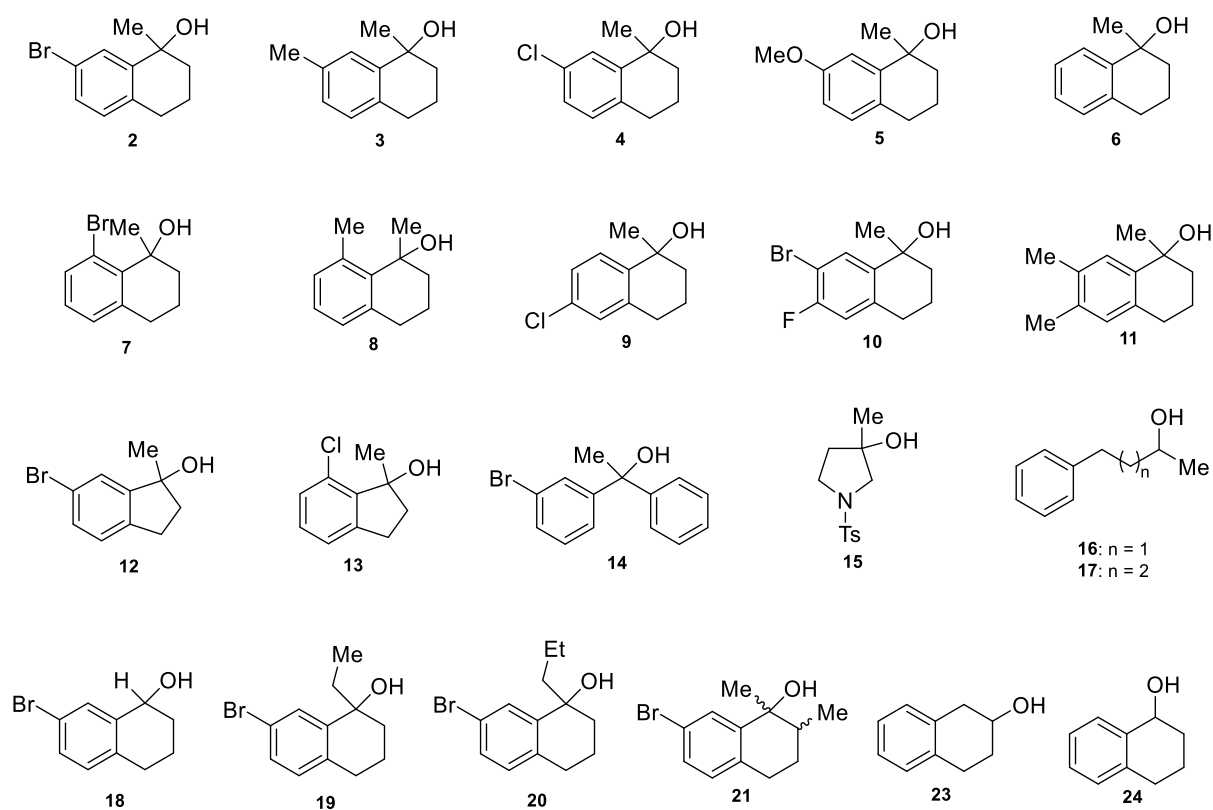

**Supplementary Fig. 40. Alcohol products resulting from the biocatalytic radical alkene hydration.**

**(1) General procedure D for the synthesis of the alcohol products (2-5, 7-15 and 19-20)**

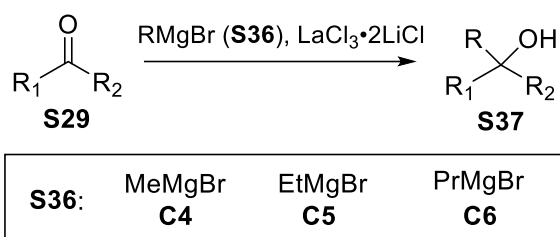

**Supplementary Fig. 41. General synthetic route D.**

**General synthetic procedure D:** The synthesis was carried out according to a reported procedure<sup>23</sup>. To a stirred solution of ketone **S29** (1.0 eq.) in THF (0.3 M),  $\text{LaCl}_3 \cdot 2\text{LiCl}$  (0.6 M in THF, 1.0 eq.) was added at 22 °C. The reaction mixture was stirred at that temperature for 1 h. The mixture was cooled to 0 °C, and the Grignard reagent **S36** in THF (1.1 eq.) was added. The resulting mixture was warmed to 22 °C and stirred for 12 h, before quenching with saturated  $\text{NH}_4\text{Cl}$ . The mixture was extracted with diethyl ether, and the combined organic phases were dried over anhydrous  $\text{Na}_2\text{SO}_4$  and filtered. The solvent was evaporated under vacuum, and the residue was subjected to flash chromatography using diethyl ether/petroleum ether to afford the alcohol **S37**.

## (2) Synthetic procedure for the synthesis of tetralol 21

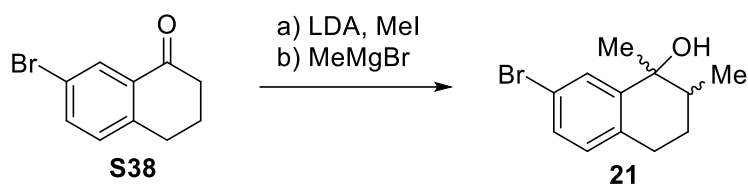

### Supplementary Fig. 42. Synthetic route for the racemic tetralol 21.

**Tetralol 21:** To a stirred solution of ketone **S38** (1.0 g, 4.44 mmol) in THF (10 mL), a lithium diisopropylamide solution (4.4 mL, 2.0 M in THF, 4.4 mmol) was added at  $-78\text{ }^{\circ}\text{C}$ . The reaction mixture was stirred at that temperature for 1 h, before adding MeI (276  $\mu\text{L}$ , 4.4 mmol). The mixture was stirred at  $-78\text{ }^{\circ}\text{C}$  for 30 min, before warming to  $22\text{ }^{\circ}\text{C}$ . The reaction mixture was stirred for 12 h, before quenching with saturated  $\text{NH}_4\text{Cl}$ . The resulting mixture was extracted with diethyl ether, and the combined organic phases were dried over anhydrous  $\text{Na}_2\text{SO}_4$  and filtered. The solvent was evaporated under vacuum, and the residue was subjected to flash chromatography using dichloromethane/petroleum ether (1:1) to afford the monomethylated ketone product (446 mg, 42% yield). To a stirred solution of the obtained ketone (185 mg, 0.77 mmol) in THF (2.0 mL),  $\text{MeMgBr}$  (0.4 mL, 3.0 M in diethyl ether, 1.2 mmol) was added at  $0\text{ }^{\circ}\text{C}$ . The reaction mixture was warmed to  $22\text{ }^{\circ}\text{C}$  and stirred for 12 h before quenching with saturated  $\text{NH}_4\text{Cl}$ . The resulting mixture was extracted with diethyl ether, and the combined organic phases were dried over anhydrous  $\text{Na}_2\text{SO}_4$  and filtered. The solvent was evaporated under vacuum, and the residue was subjected to flash chromatography using diethyl ether /petroleum ether (1:5) to afford the **tetralol 21** as a racemic mixture of diastereomers (173 mg, 88% yield, 1.14:1 d.r.).

### (3) Characterization of the alcohol products

The spectral of synthesized alcohol products **2**<sup>24</sup>, **5**<sup>25</sup>, **7**<sup>26</sup>, **9**<sup>27</sup>, **12**<sup>28</sup> and **14**<sup>29</sup> are identical to the reported data. Alcohols **6**, **16**, **17**, **18**, **23** and **24** are commercially available, and used without further purification.

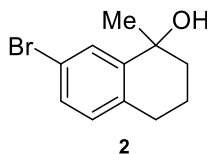

The tetralol **2** was prepared according to the general procedure **D**, 94% yield.

Chiral SFC separation conditions: Chiralpak IA, 4.6 × 250 mm; gradient, 10% *i*-PrOH (14 min)–10% to 30% *i*-PrOH (1 min)–30% *i*-PrOH (3 min)–30% to 10% *i*-PrOH (1 min)– 10% *i*-PrOH (1 min), 2.5 mL/min, 230 nm; retention time: 6.50 min, 9.71 min. 1,3,5-trimethoxybenzene was used as internal standard (1.85 min).

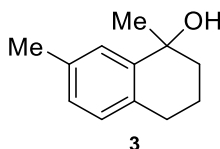

The tetralol **3** was prepared according to the general procedure **D**, 92% yield.

<sup>1</sup>H NMR (500 MHz, DMSO-*d*<sub>6</sub>) δ 7.34–7.31 (m, 1H), 6.93–6.86 (m, 2H), 4.77 (s, 1H), 2.70–2.57 (m, 2H), 2.28–2.21 (m, 3H), 1.88–1.61 (m, 4H), 1.36 (s, 3H) ppm. <sup>13</sup>C NMR (126 MHz, DMSO-*d*<sub>6</sub>) δ 144.1, 134.3, 132.4, 128.1, 127.0, 68.7, 31.5, 29.1, 20.9, 20.2 ppm. HRMS (*m/z*): [M+H]<sup>+</sup> calcd for C<sub>11</sub>H<sub>14</sub>BrO<sup>+</sup> 241.0223, found 241.0223.

Chiral SFC separation conditions: Chiralpak IA, 4.6 × 250 mm; isocratic, 10% *i*-PrOH in CO<sub>2</sub>, 2.5 mL/min, 210 nm; retention time: 3.86 min, 5.01 min. 1,3,5-trimethoxybenzene was used as internal standard (1.84 min).

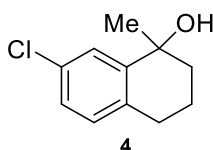

The tetralol **4** was prepared according to the general procedure **D**, 90% yield.

<sup>1</sup>H NMR (500 MHz, DMSO-*d*<sub>6</sub>) δ 7.51 (d, *J* = 2.4 Hz, 1H), 7.15 (dd, *J* = 8.2, 2.4 Hz, 1H), 7.06 (dt, *J* = 8.2, 1.1 Hz, 1H), 5.02 (s, 1H), 2.70–2.63 (m, 2H), 1.89–1.64 (m, 4H), 1.36 (s, 3H) ppm. <sup>13</sup>C NMR (126 MHz, DMSO-*d*<sub>6</sub>) δ 146.8, 134.5, 130.2, 130.1, 126.2, 126.1, 68.8, 38.6, 31.3, 28.7, 19.8 ppm. HRMS (*m/z*): [M+H]<sup>+</sup> calcd for C<sub>11</sub>H<sub>14</sub>ClO<sup>+</sup> 197.0728, found 197.0728.

Chiral SFC separation conditions: Chiralpak IE, 4.6 × 250 mm; isocratic, 8% *i*-PrOH in CO<sub>2</sub>, 2.5 mL/min, 220 nm; retention time: 5.62 min, 8.05 min. 1,3,5-trimethoxybenzene was used as internal standard (1.93 min).



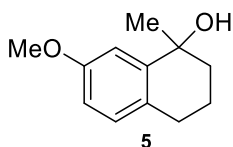

The tetralol **5** was prepared according to the general procedure **D**, 88% yield.

Chiral SFC separation conditions: Chiralpak IA, 4.6 × 250 mm; isocratic, 10% *i*-PrOH in CO<sub>2</sub>, 2.5 mL/min, 210 nm; retention time: 4.90 min, 5.76 min. 1,3,5-trimethoxybenzene was used as internal standard (2.09 min).

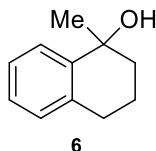

Chiral SFC separation conditions: Chiralpak IE, 4.6 × 250 mm; isocratic, 8% *i*-PrOH in CO<sub>2</sub>, 2.5 mL/min, 210 nm; retention time: 4.78 min, 5.26 min. 1,3,5-trimethoxybenzene was used as internal standard (1.92 min).

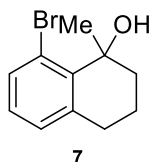

The tetralol **7** was prepared according to the general procedure **D**, 91% yield.

Chiral SFC separation conditions: Chiralpak IH, 4.6 × 250 mm; isocratic, 10% *i*-PrOH in CO<sub>2</sub>, 2.5 mL/min, 210 nm; retention time: 3.44 min, 3.81 min. 1,3,5-trimethoxybenzene was used as internal standard (1.57 min).

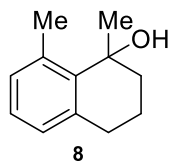

The tetralol **8** was prepared according to the general procedure **D**, 90% yield.

<sup>1</sup>H NMR (500 MHz, CD<sub>2</sub>Cl<sub>2</sub>) δ 7.05–6.93 (m, 2H), 6.92–6.86 (m, 1H), 2.88–2.79 (m, 1H), 2.79–2.71 (m, 1H), 2.60 (s, 3H), 1.99 (dddd, J = 12.4, 5.7, 2.7, 1.5 Hz, 1H), 1.90–1.73 (m, 3H), 1.67 (s, 1H), 1.57 (s, 3H) ppm. <sup>13</sup>C NMR (126 MHz, CD<sub>2</sub>Cl<sub>2</sub>) δ 141.0, 138.0, 137.5, 130.8, 127.4, 126.9, 72.9, 43.9, 31.7, 28.6, 22.3, 21.3 ppm. HRMS (m/z): [M+H]<sup>+</sup> calcd for C<sub>12</sub>H<sub>17</sub>O<sup>+</sup> 177.1274, found 177.1274.

Chiral SFC separation conditions: Chiralpak IG, 4.6 × 250 mm; isocratic, 5% *i*-PrOH in CO<sub>2</sub>, 2.5 mL/min, 220 nm; retention time: 8.22 min, 9.84 min. 1,3,5-trimethoxybenzene was used as internal standard (3.21 min).

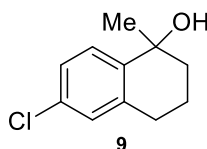

The tetralol **9** was prepared according to the general procedure **D**, 92% yield.

Chiral SFC separation conditions: Chiralpak IA, 4.6 × 250 mm; isocratic, 10% *i*-PrOH in CO<sub>2</sub>, 2.5 mL/min, 220 nm; retention time: 5.36 min, 7.01 min. 1,3,5-trimethoxybenzene was used as internal standard (1.77 min).

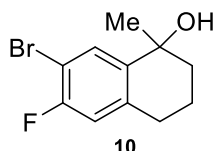

The tetralol **10** was prepared according to the general procedure **D**, 88% yield.

<sup>1</sup>H NMR (500 MHz, CDCl<sub>3</sub>) δ 7.76 (d, *J* = 7.1 Hz, 1H), 6.82 (dt, *J* = 9.2, 1.0 Hz, 1H), 2.83–2.57 (m, 2H), 1.97–1.77 (m, 4H), 1.69 (s, 1H), 1.53 (s, 3H) ppm. <sup>13</sup>C NMR (126 MHz, CDCl<sub>3</sub>) δ 157.9 (d, *J* = 247.0 Hz), 140.6 (d, *J* = 3.4 Hz), 138.0 (d, *J* = 6.7 Hz), 131.8 (d, *J* = 1.1 Hz), 116.1 (d, *J* = 21.2 Hz), 106.6 (d, *J* = 21.0 Hz), 70.4, 39.6, 31.1, 29.7 (d, *J* = 1.4 Hz), 20.3 ppm. HRMS (*m/z*): [*M*+H]<sup>+</sup> calcd for C<sub>11</sub>H<sub>13</sub>OBrF<sup>+</sup> 259.0128, found 259.0128.

Chiral SFC separation conditions: Chiralpak IA, 4.6 × 250 mm; isocratic, 10% *i*-PrOH in CO<sub>2</sub>, 2.5 mL/min, 230 nm; retention time: 5.41 min, 7.59 min. 1,3,5-trimethoxybenzene was used as internal standard (1.79 min).

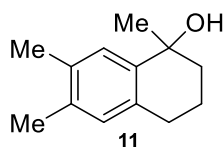

The tetralol **11** was prepared according to the general procedure **D**, 92% yield.

<sup>1</sup>H NMR (500 MHz, CD<sub>2</sub>Cl<sub>2</sub>) δ 7.34 (s, 1H), 6.86 (s, 1H), 2.79–2.63 (m, 2H), 2.27 (d, *J* = 2.2 Hz, 3H), 2.24 (d, *J* = 1.9 Hz, 3H), 1.94–1.74 (m, 4H), 1.52 (s, 3H) ppm. <sup>13</sup>C NMR (151 MHz, CD<sub>2</sub>Cl<sub>2</sub>) δ 140.8, 135.7, 134.7, 134.0, 130.1, 127.6, 70.5, 40.3, 31.0, 29.8, 21.0, 19.6, 19.4 ppm. HRMS (*m/z*): [*M*+H]<sup>+</sup> calcd for C<sub>13</sub>H<sub>19</sub>O<sup>+</sup> 191.1430, found 191.1430.

Chiral SFC separation conditions: Chiralpak ID, 4.6 × 250 mm; isocratic, 6% *i*-PrOH in CO<sub>2</sub>, 2.5 mL/min, 210 nm; retention time: 5.03 min, 6.06 min. 1,3,5-trimethoxybenzene was used as internal standard (1.87 min).

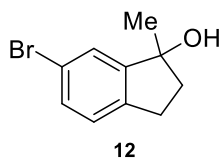

The indanol **12** was prepared according to the general procedure **D**, 93% yield.

Chiral SFC separation conditions: Chiralpak IA, 4.6 × 250 mm; isocratic, 10% *i*-PrOH in CO<sub>2</sub>, 2.5 mL/min, 272 nm; retention time: 4.97 min, 7.33 min. 1,3,5-trimethoxybenzene was used as internal standard (1.80 min).

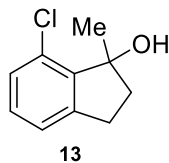

The indanol **13** was prepared according to the general procedure **D**, 94% yield.

<sup>1</sup>H NMR (500 MHz, CD<sub>2</sub>Cl<sub>2</sub>) δ 7.20–7.10 (m, 3H), 2.98–2.89 (m, 1H), 2.85–2.76 (m, 1H), 2.64 (s, 1H), 2.26–2.17 (m, 2H), 1.62 (s, 3H) ppm. <sup>13</sup>C NMR (126 MHz, CD<sub>2</sub>Cl<sub>2</sub>) δ 145.6, 144.3, 130.1, 129.7, 128.2, 124.2, 82.9, 42.4, 29.5, 26.9 ppm. HRMS (m/z): [M+H]<sup>+</sup> calcd for C<sub>10</sub>H<sub>12</sub>ClO<sup>+</sup> 183.0571, found 183.0571.

Chiral SFC separation conditions: Chiralpak IE, 4.6 × 250 mm; isocratic, 5% *i*-PrOH in CO<sub>2</sub>, 2.5 mL/min, 220 nm; retention time: 5.36 min, 5.75 min. 1,3,5-trimethoxybenzene was used as internal standard (2.24 min).

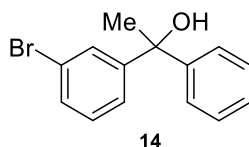

The acyclic alcohol **14** was prepared according to the general procedure **D**, 91% yield.

Chiral SFC separation conditions: Chiralpak IF, 4.6 × 250 mm; isocratic, 10% *i*-PrOH in CO<sub>2</sub>, 2.5 mL/min, 230 nm; retention time: 4.64 min, 5.50 min. 1,3,5-trimethoxybenzene was used as internal standard (1.61 min).

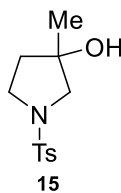

The pyrrolidinol **15** was prepared according to the general procedure **D**, 87% yield.

<sup>1</sup>H NMR (600 MHz, CD<sub>2</sub>Cl<sub>2</sub>) δ 7.69 (d, J = 6.6 Hz, 2H), 7.35 (d, J = 8.0 Hz, 2H), 3.38–3.33 (m, 2H), 3.21 (d, J = 10.6 Hz, 1H), 3.10 (d, J = 10.5 Hz, 1H), 2.43 (s, 3H), 1.85–1.72 (m, 2H), 1.48 (s, 1H), 1.28 (s, 3H) ppm. <sup>13</sup>C NMR (151 MHz, CD<sub>2</sub>Cl<sub>2</sub>) δ 144.1, 134.1, 130.0, 127.9, 77.4, 60.7, 47.3, 39.9, 25.3, 21.6 ppm. HRMS (m/z): [M+Na]<sup>+</sup> calcd for C<sub>12</sub>H<sub>17</sub>NO<sub>3</sub>SN<sup>+</sup> 278.0821, found 278.0825.

Chiral SFC separation conditions: Chiralpak IG,  $4.6 \times 250$  mm; isocratic, 25% *i*-PrOH in CO<sub>2</sub>, 2.5 mL/min, 230 nm; retention time: 7.97 min, 9.54 min. 1,3,5-trimethoxybenzene was used as internal standard (1.52 min).

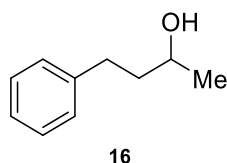

Chiral SFC separation conditions: Chiralpak ID,  $4.6 \times 250$  mm; isocratic, 5% MeCN in CO<sub>2</sub>, 2.5 mL/min, 210 nm; retention time: 5.58 min, 7.20 min. 1,3,5-trimethoxybenzene was used as internal standard (2.78 min).

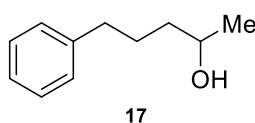

Chiral SFC separation conditions: Chiralpak ID,  $4.6 \times 250$  mm; isocratic, 5% MeCN in CO<sub>2</sub>, 2.5 mL/min, 210 nm; retention time: 6.85 min, 7.52 min. 1,3,5-trimethoxybenzene was used as internal standard (2.88 min).

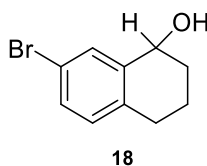

Chiral SFC separation conditions: Chiralpak IE,  $4.6 \times 250$  mm; isocratic, 10% *i*-PrOH in CO<sub>2</sub>, 2.5 mL/min, 230 nm; retention time: 7.27 min, 8.25 min. 1,3,5-trimethoxybenzene was used as internal standard (1.76 min).

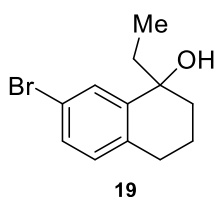

The tetralol **19** was prepared according to the general procedure **D**, 89% yield.

<sup>1</sup>H NMR (500 MHz, CD<sub>3</sub>CN)  $\delta$  7.56 (d, *J* = 2.1 Hz, 1H), 7.21 (dd, *J* = 8.2, 2.2 Hz, 1H), 6.94 (dt, *J* = 8.1, 1.0 Hz, 1H), 2.94 (s, 1H), 2.72–2.55 (m, 2H), 1.93–1.87 (m, 1H), 1.81–1.59 (m, 5H), 0.77 (t, *J* = 7.4 Hz, 3H) ppm. <sup>13</sup>C NMR (126 MHz, CD<sub>3</sub>CN)  $\delta$  146.94, 136.99, 131.64, 130.32, 130.26, 119.76, 72.70, 35.74, 35.30, 29.76, 20.18, 8.60 ppm. HRMS (*m/z*): [*M*+H]<sup>+</sup> calcd for C<sub>12</sub>H<sub>16</sub>OBr<sup>+</sup> 255.0379, found 255.0379.

Chiral SFC separation conditions: Chiralpak IH,  $4.6 \times 250$  mm; isocratic, 10% *i*-PrOH in CO<sub>2</sub>, 2.5 mL/min, 230 nm; retention time: 3.25 min, 4.08 min. 1,3,5-trimethoxybenzene was used as internal standard (1.81 min).

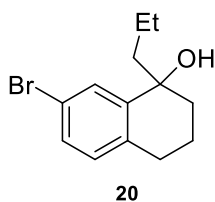

The tetralol **20** was prepared according to the general procedure **D**, 90% yield.

$^1\text{H}$  NMR (500 MHz, DMSO- $d_6$ )  $\delta$  7.59 (d,  $J$  = 2.2 Hz, 1H), 7.27 (dd,  $J$  = 8.2, 2.2 Hz, 1H), 7.04–6.98 (m, 1H), 4.90 (s, 1H), 2.71–2.57 (m, 2H), 1.91–1.50 (m, 6H), 1.38–1.27 (m, 1H), 1.27–1.13 (m, 1H), 0.84 (t,  $J$  = 7.3 Hz, 3H) ppm.  $^{13}\text{C}$  NMR (126 MHz, DMSO- $d_6$ )  $\delta$  147.1, 135.2, 130.6, 129.1, 128.9, 118.4, 70.6, 44.8, 34.8, 28.5, 19.1, 16.6, 14.4 ppm. HRMS ( $m/z$ ):  $[\text{M}+\text{H}]^+$  calcd for  $\text{C}_{13}\text{H}_{18}\text{OBr}^+$  269.0536, found 269.0536.

Chiral SFC separation conditions: Chiralpak IA,  $4.6 \times 250$  mm; isocratic, 10% *i*-PrOH in  $\text{CO}_2$ , 2.5 mL/min, 230 nm; retention time: 6.33 min, 8.95 min. 1,3,5-trimethoxybenzene was used as internal standard (1.87 min).

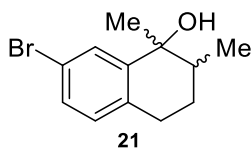

Tetralol **21**:  $^1\text{H}$  NMR (500 MHz,  $\text{CD}_2\text{Cl}_2$ )  $\delta$  7.75 (d,  $J$  = 2.1 Hz, 0.53H), 7.74 (d,  $J$  = 2.1 Hz, 0.47H), 7.30–7.22 (m, 1H), 6.96 (dt,  $J$  = 8.1, 1.0 Hz, 0.47H), 6.93 (dt,  $J$  = 8.1, 1.1 Hz, 0.53H), 2.85–2.62 (m, 2H), 1.94–1.80 (m, 2H), 1.73–1.55 (m, 2H), 1.51 (s, 1.4H), 1.30 (s, 1.6H), 1.07 (d,  $J$  = 6.6 Hz, 1.6H), 1.04 (d,  $J$  = 6.9 Hz, 1.4H) ppm.  $^{13}\text{C}$  NMR (126 MHz,  $\text{CD}_2\text{Cl}_2$ )  $\delta$  147.78, 145.46, 135.48, 135.26, 130.90, 130.70, 130.24, 130.14, 130.03, 129.75, 119.95, 119.85, 74.05, 72.51, 41.09, 39.50, 30.10, 28.71, 28.68, 27.32, 27.29, 25.08, 15.45, 14.68 ppm. HRMS ( $m/z$ ):  $[\text{M}+\text{H}]^+$  calcd for  $\text{C}_{12}\text{H}_{16}\text{OBr}^+$  255.0397, found 255.0397.

Chiral SFC separation conditions: Chiralpak IA,  $4.6 \times 250$  mm; isocratic, 10% *i*-PrOH in  $\text{CO}_2$ , 2.5 mL/min, 230 nm; retention time: 6.84 min and 10.48 min, 7.54 min and 9.87 min. 1,3,5-trimethoxybenzene was used as internal standard (1.76 min).

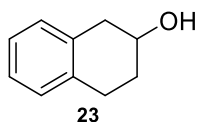

Chiral SFC separation conditions: Chiralpak IG,  $4.6 \times 250$  mm; isocratic, 10% *i*-PrOH in  $\text{CO}_2$ , 2.5 mL/min, 210 nm; retention time: 6.60 min and 7.17 min. 1,3,5-trimethoxybenzene was used as internal standard (2.30 min).

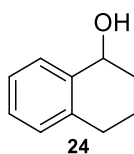

Chiral SFC separation conditions: Chiralpak IG,  $4.6 \times 250$  mm; isocratic, 10% *i*-PrOH in CO<sub>2</sub>, 2.5 mL/min, 210 nm; retention time: 6.26 min and 6.89 min. 1,3,5-trimethoxybenzene was used as internal standard (2.30 min).

Chiral GC separation conditions: CP-Chiralsil-Dex-CB,  $25\text{ m} \times 0.25\text{ mm} \times 0.25\text{ }\mu\text{m}$  film thickness, gradient method, temperature program: 50 °C (2 min)–10 °C/min–190 °C (4 min); retention time: 14.854 min, 14.905 min. 1,3,5-trimethoxybenzene was used as internal standard (13.634 min).

## 7. Supporting Figures

### 7.1 Calibration Curves

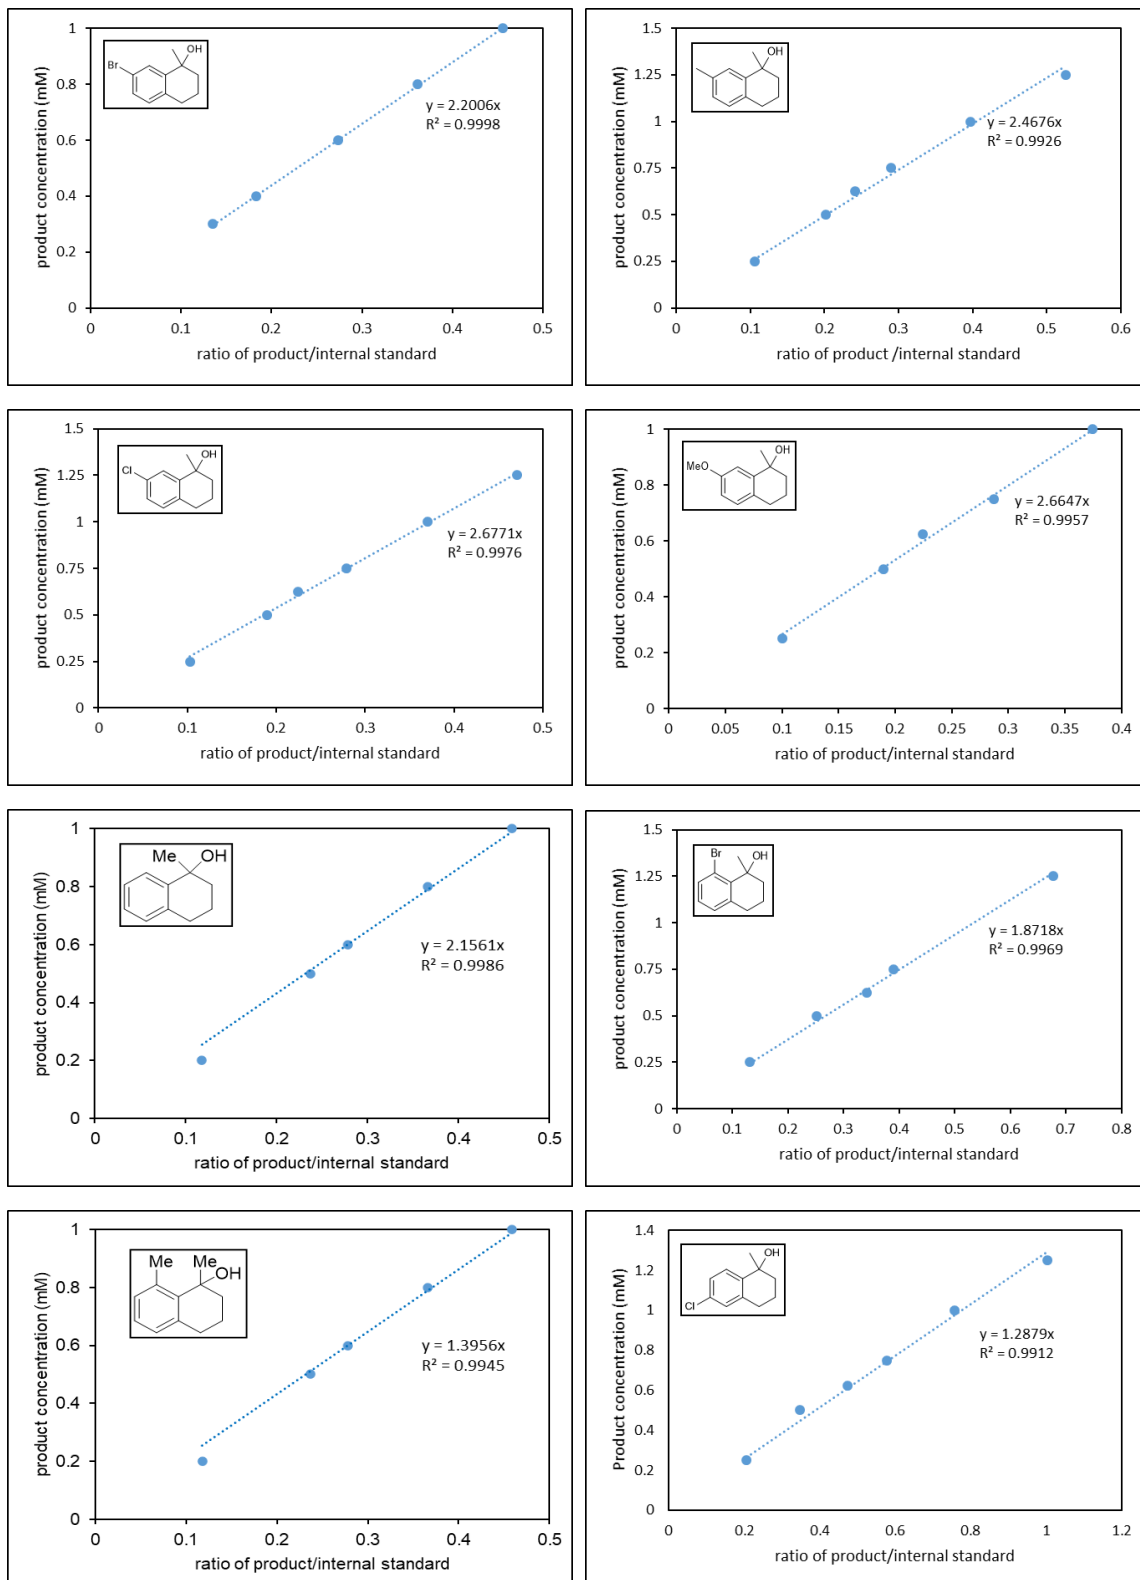

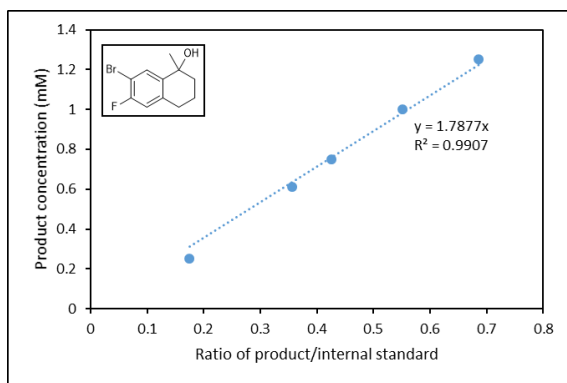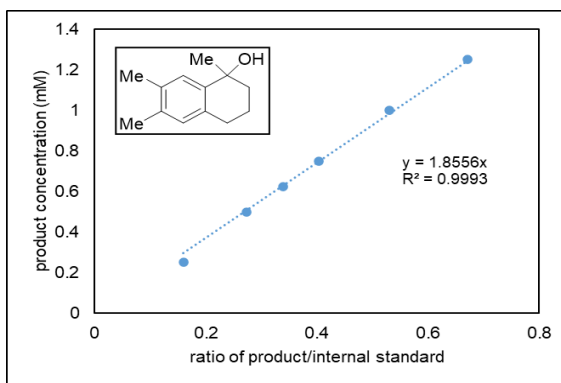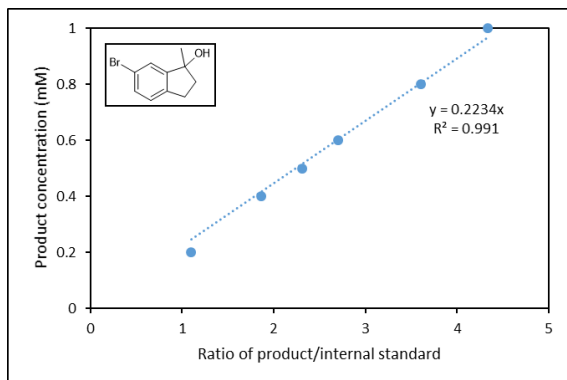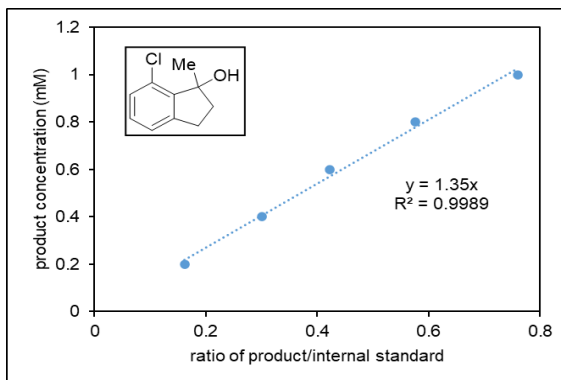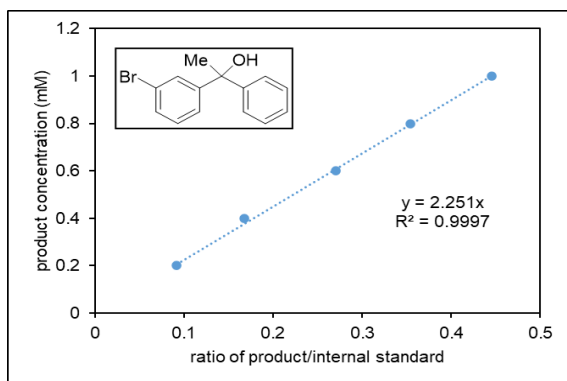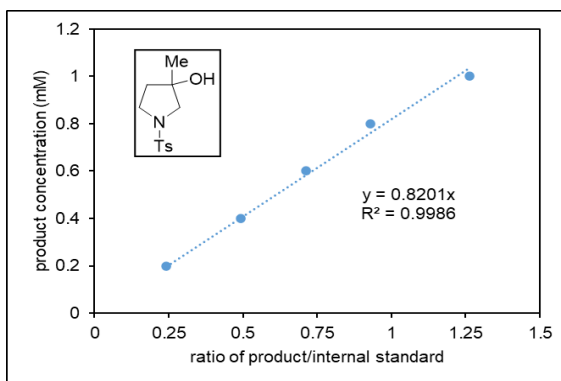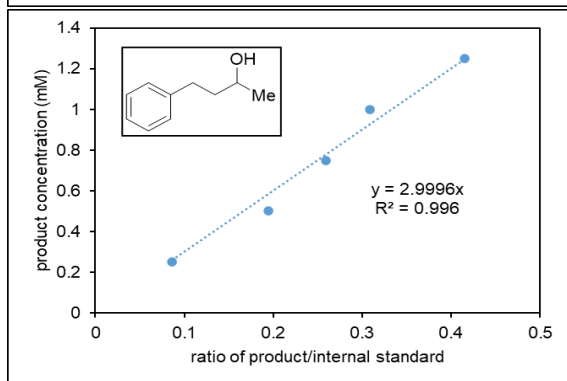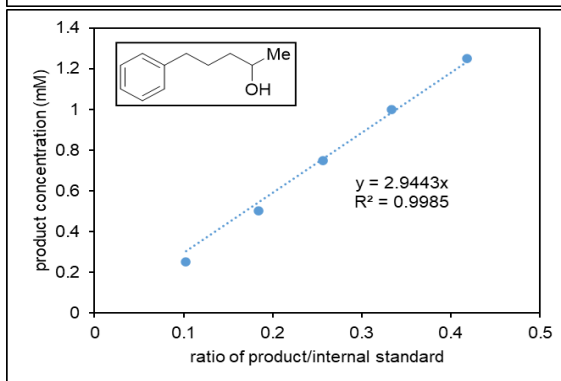



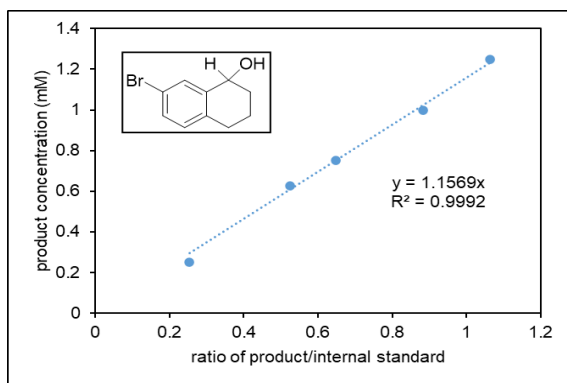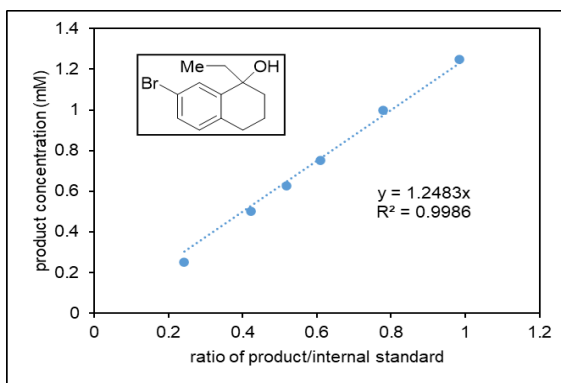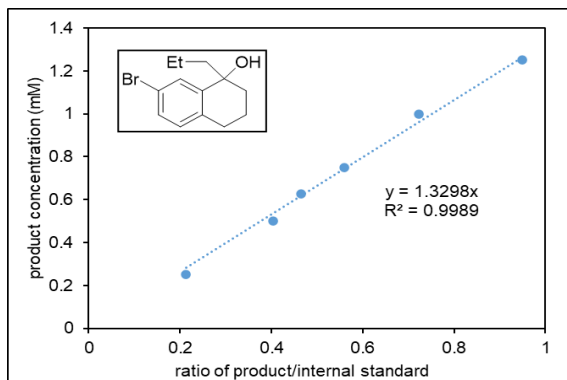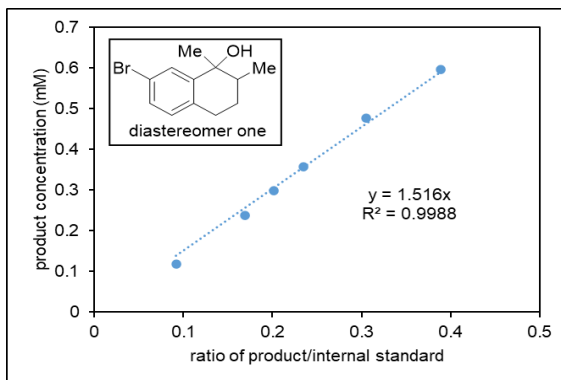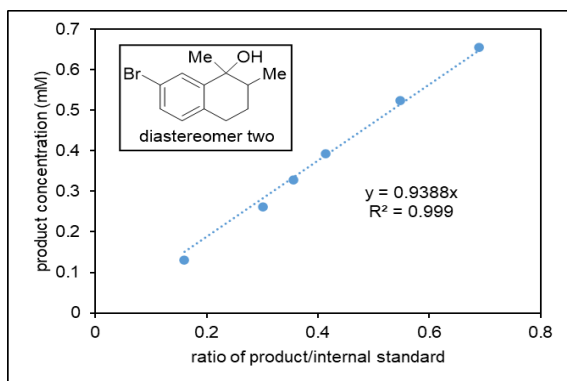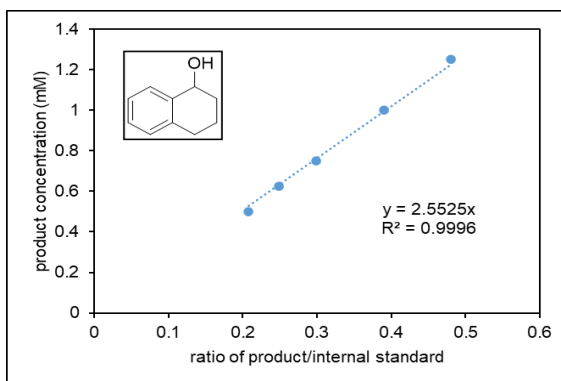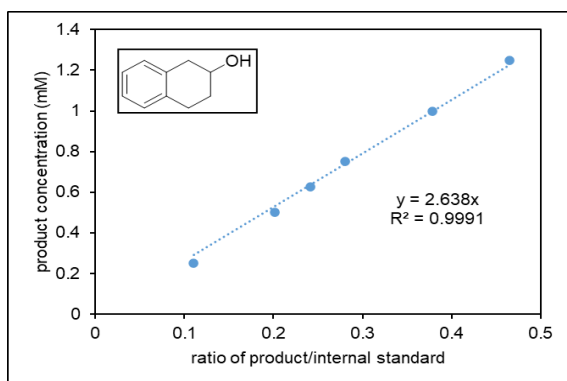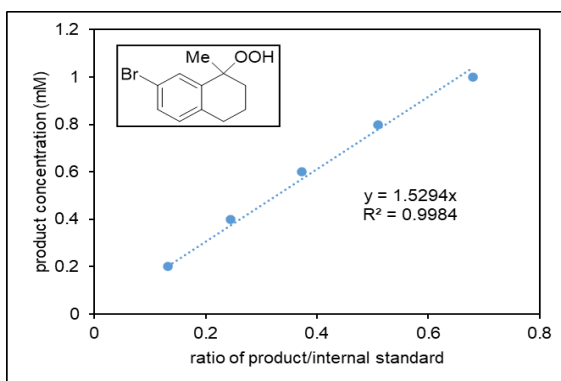

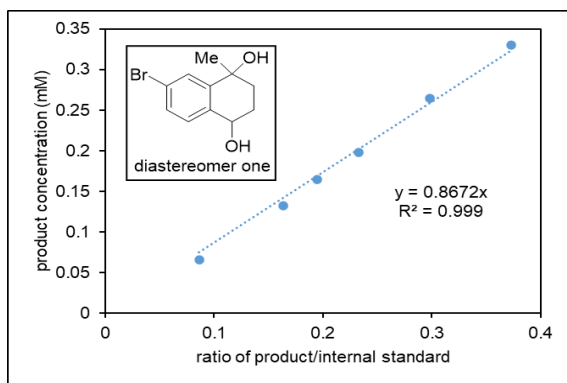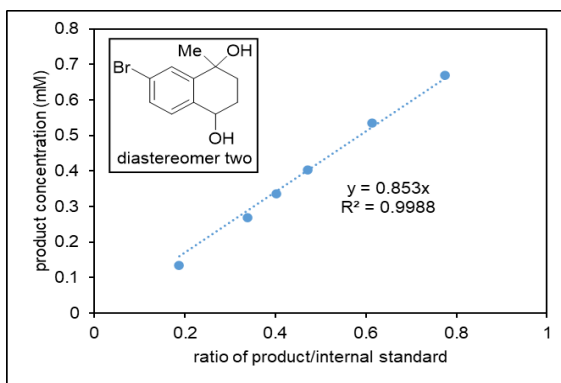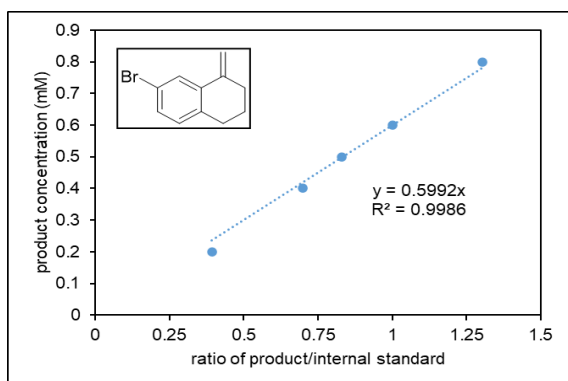

## 7.2 SFC traces

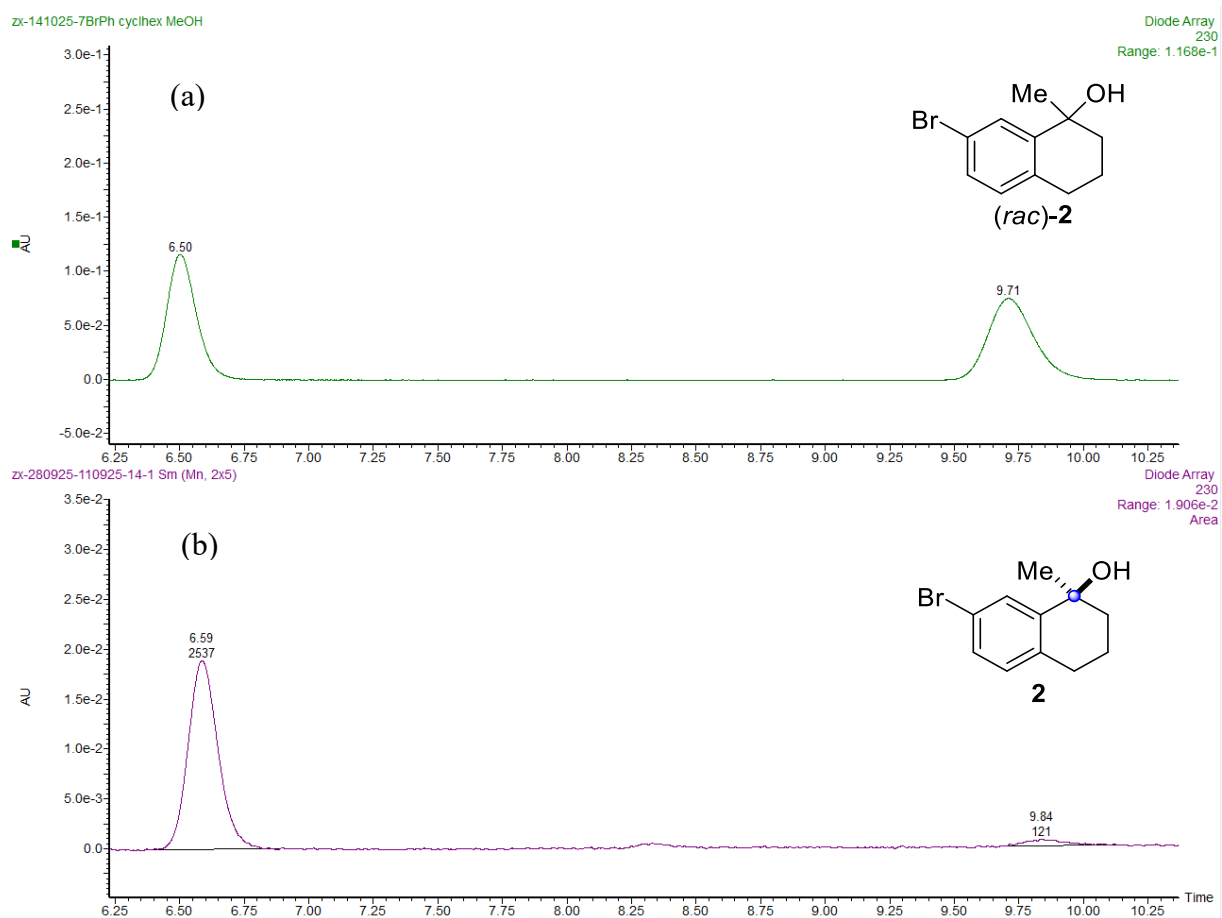

**Supplementary Fig. 43. SFC traces of the radical hydration product tetralol 2.** (a) Racemic tetralol 2. (b) Biocatalytic radical hydration of alkene 1 with P450<sub>BM3</sub>\_QTG and PhSiMeH<sub>2</sub>.

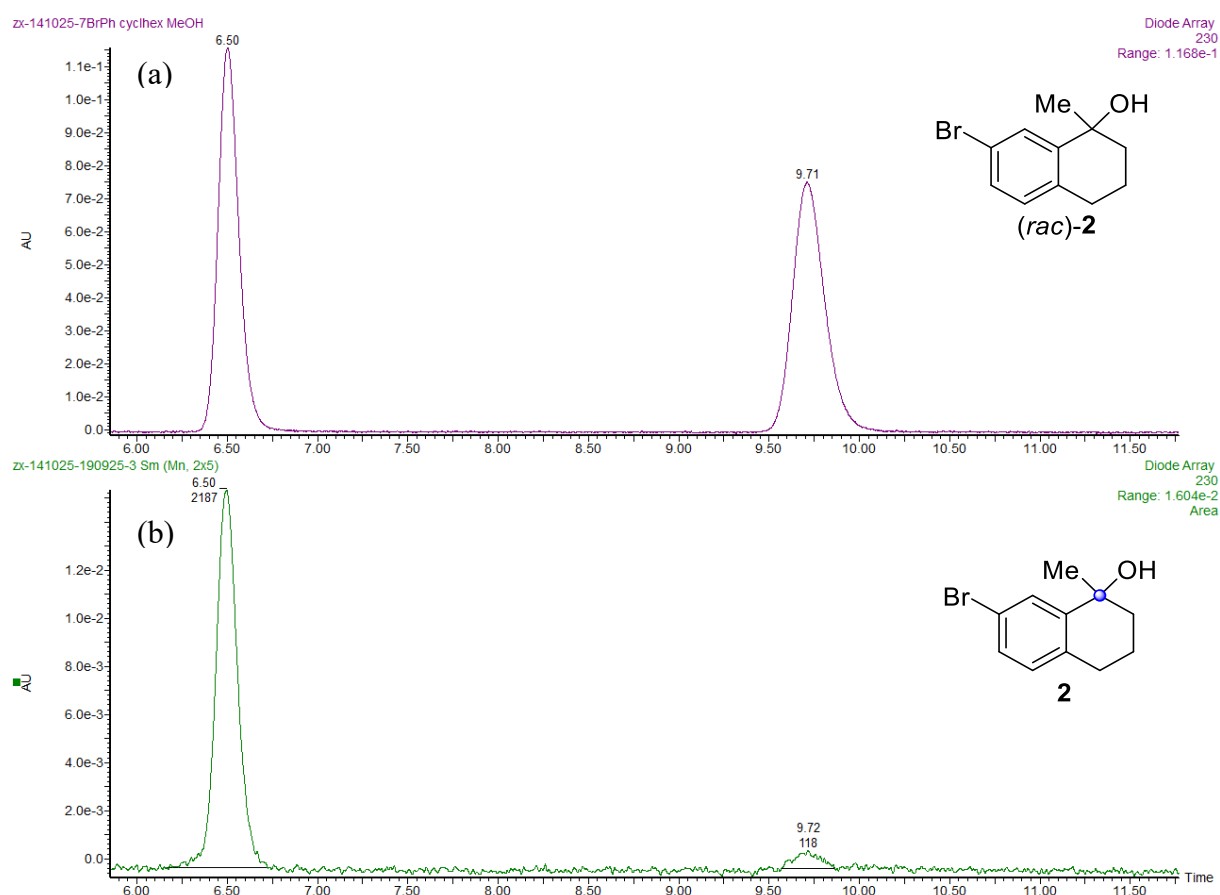

**Supplementary Fig. 44. SFC traces of the radical hydration product tetralol 2.** (a) Racemic tetralol 2. (b) Biocatalytic radical hydration of alkene **S20** with P450<sub>BM3</sub>\_QTG and PhSiMeH<sub>2</sub>.

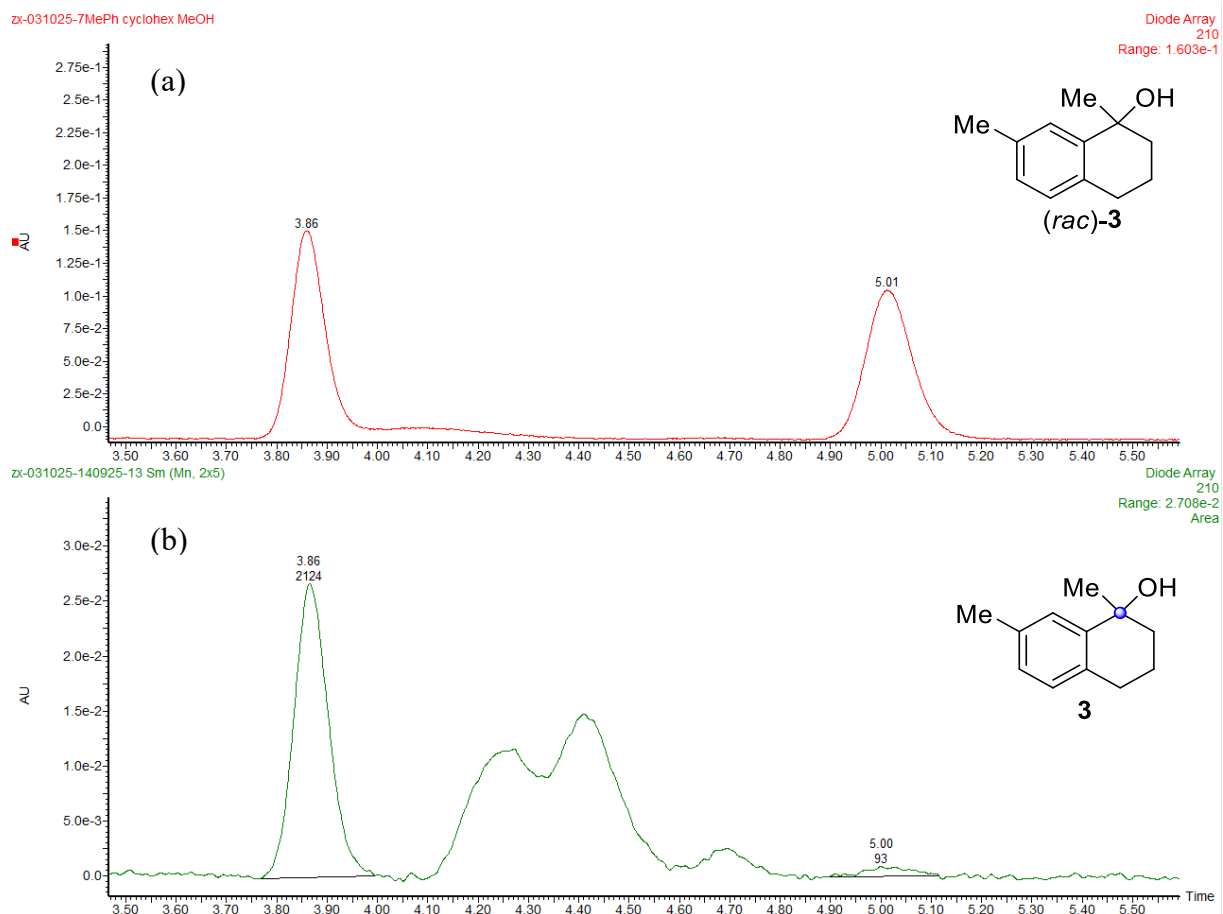

**Supplementary Fig. 45. SFC traces of the radical hydration product tetralol 3.** (a) Racemic tetralol 3. (b) Biocatalytic radical hydration of alkene S1 with P450<sub>BM3</sub>\_QTG and PhSiMeH<sub>2</sub>.

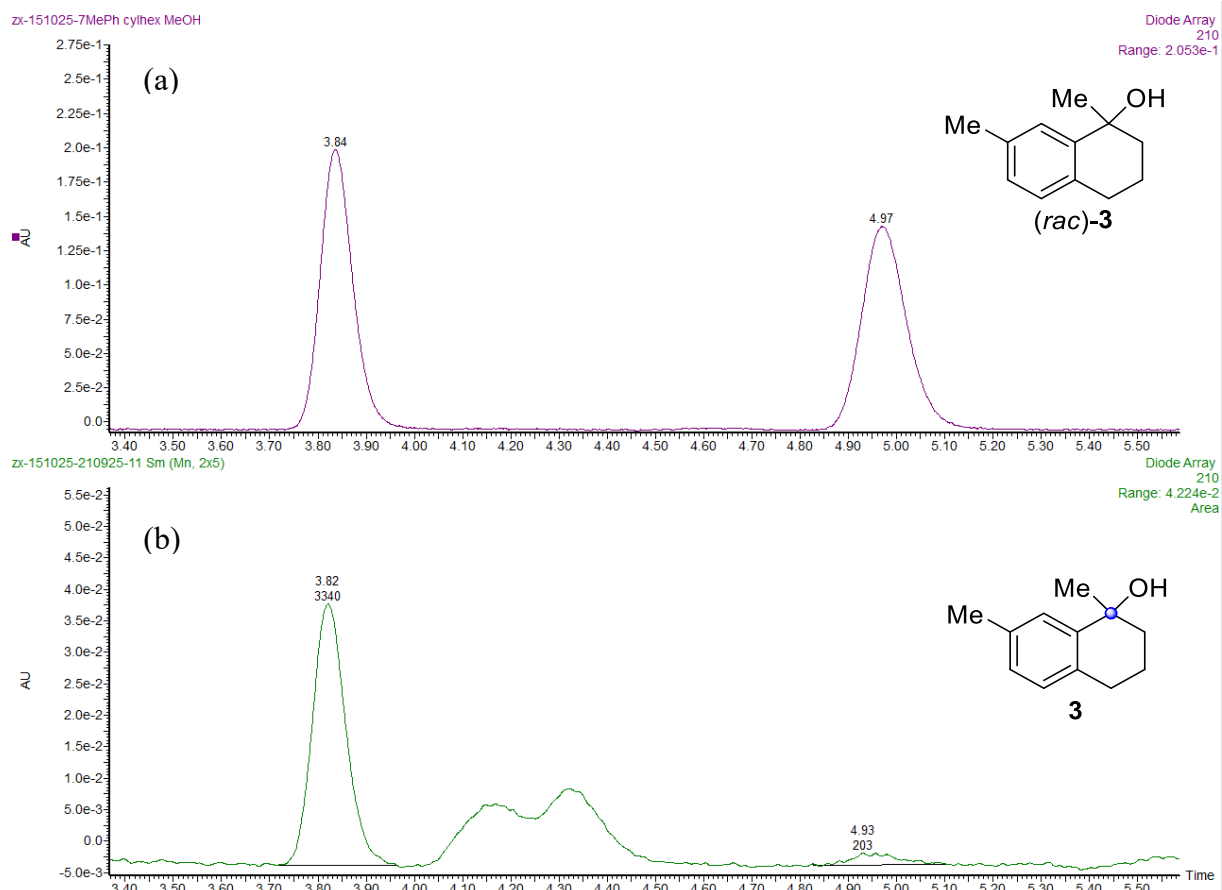

**Supplementary Fig. 46. SFC traces of the radical hydration product tetralol **3**.** (a) Racemic tetralol **3**. (b) Biocatalytic radical hydration of alkene **S21** with P450<sub>BM3</sub>\_QTG and PhSiMeH<sub>2</sub>.

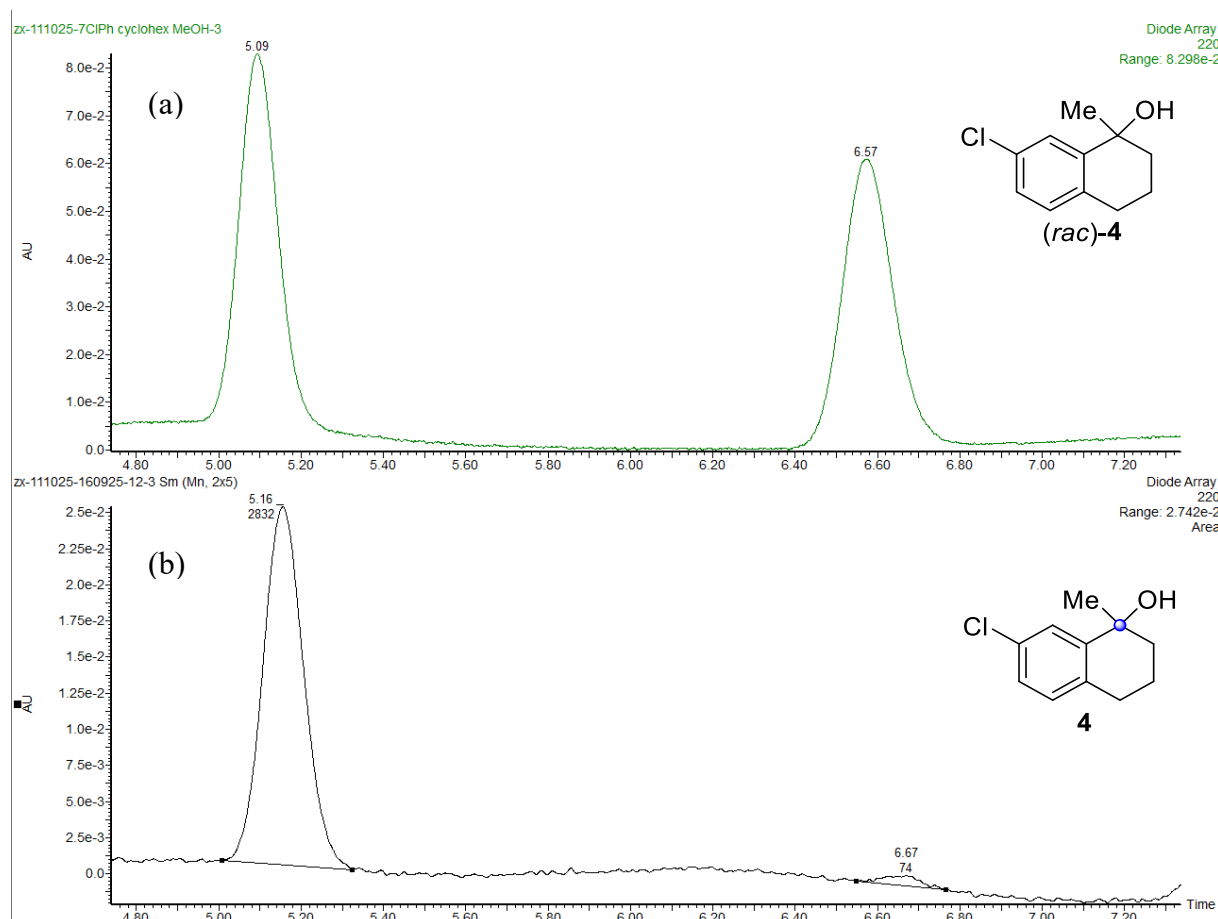

**Supplementary Fig. 47. SFC traces of the radical hydration product tetralol 4.** (a) Racemic tetralol 4. (b) Biocatalytic radical hydration of alkene S5 with P450<sub>BM3</sub>\_QTG and PhSiMeH<sub>2</sub>.

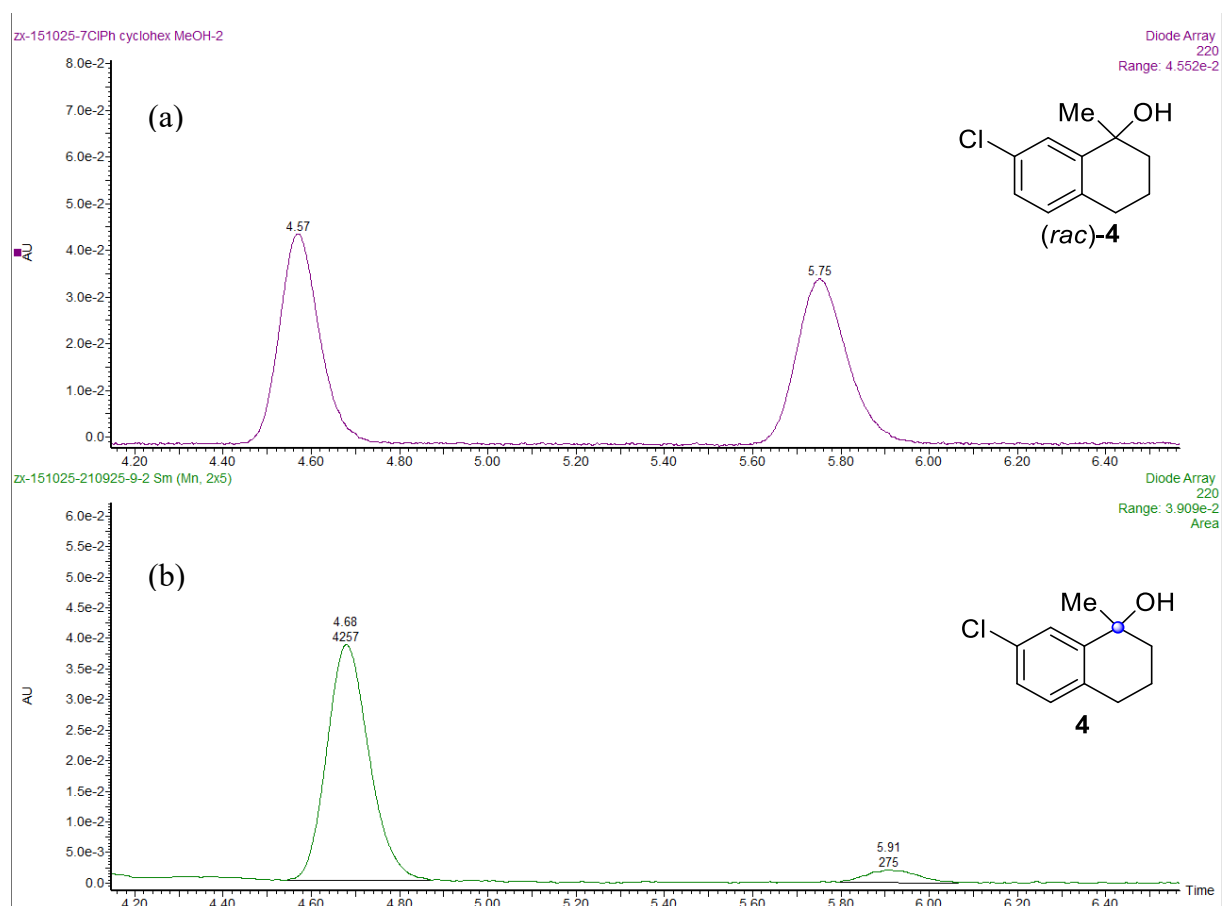

**Supplementary Fig. 48. SFC traces of the radical hydration product tetralol 4.** (a) Racemic tetralol 4. (b) Biocatalytic radical hydration of alkene S22 with P450<sub>BM3</sub>\_QTG and PhSiMeH<sub>2</sub>.



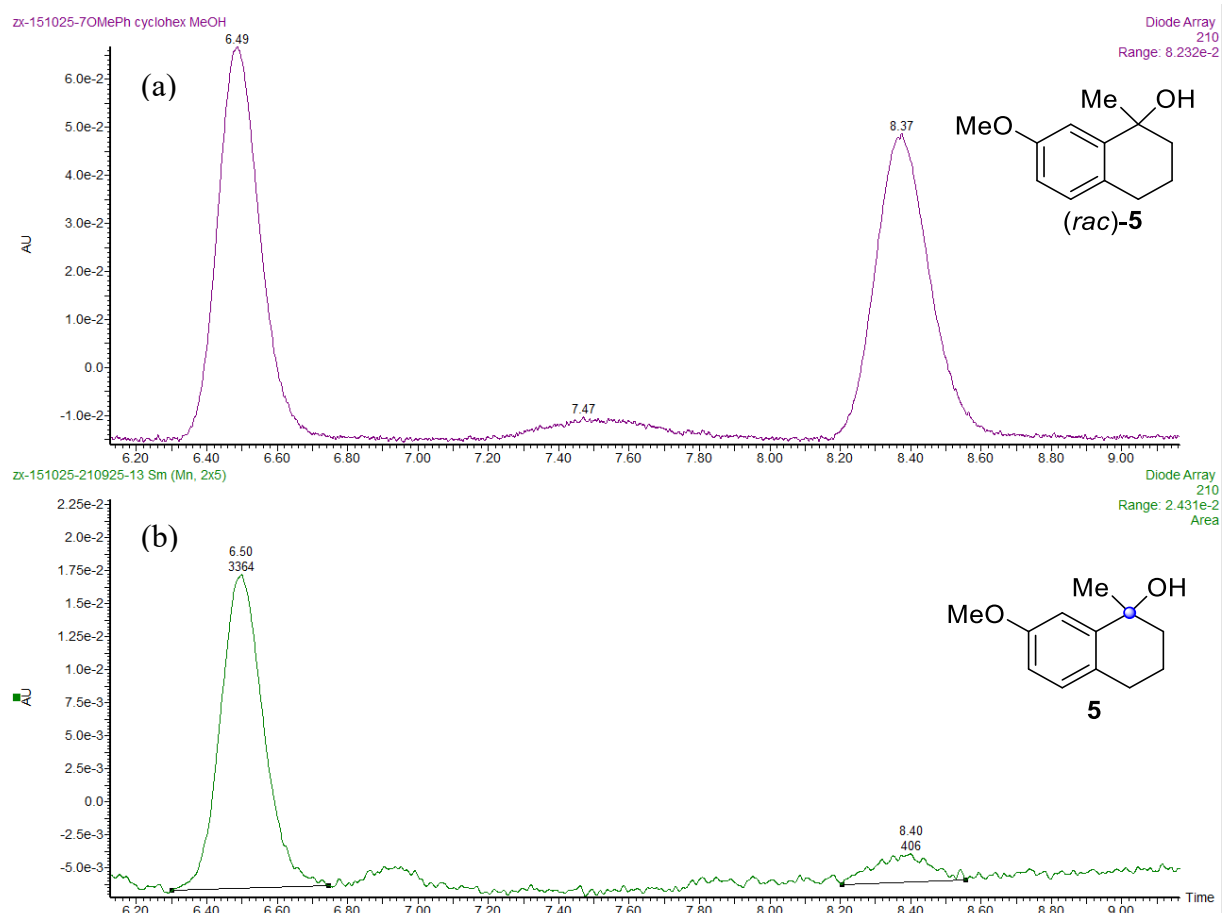

**Supplementary Fig. 49. SFC traces of the radical hydration product tetralol 5.** (a) Racemic tetralol 5. (b) Biocatalytic radical hydration of alkene S6 with P450<sub>BM3</sub>\_QTG and PhSiMeH<sub>2</sub>.

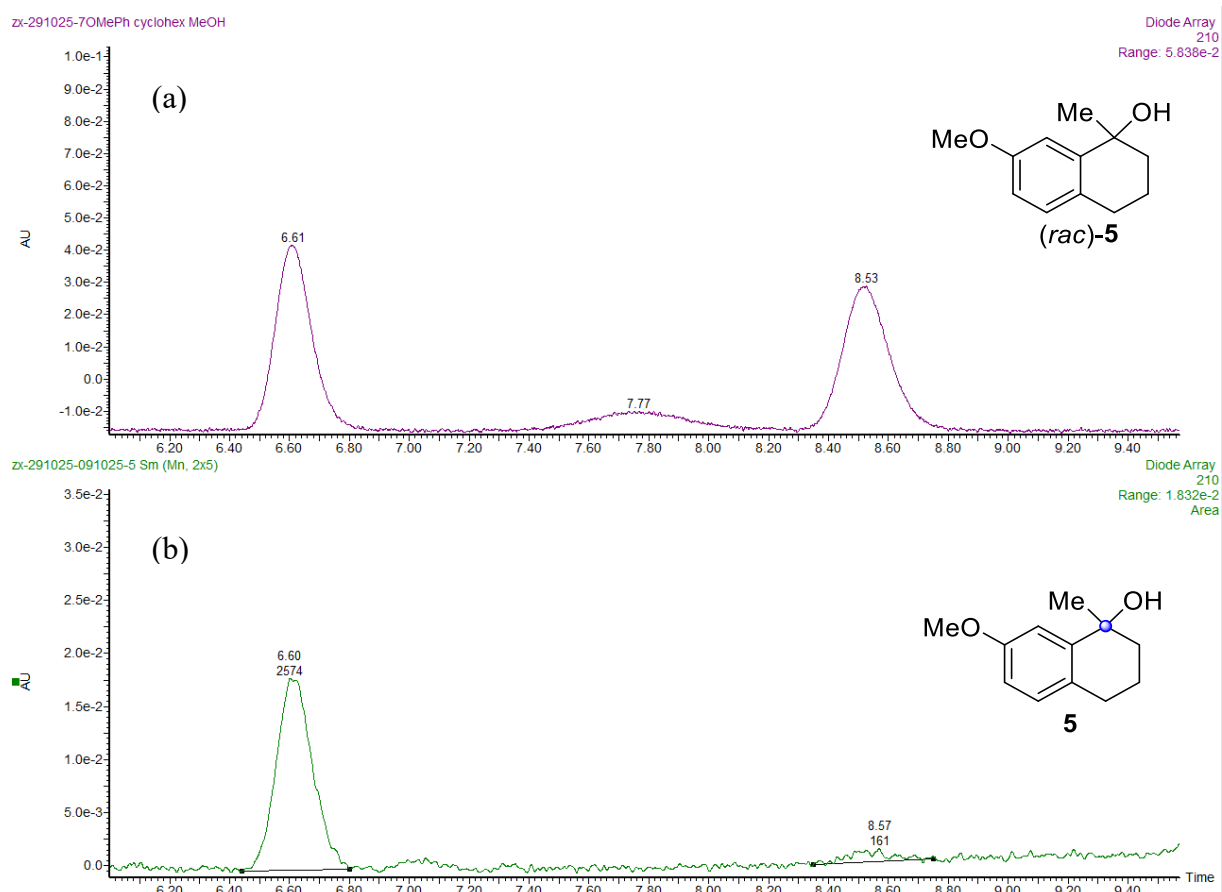

**Supplementary Fig. 50. SFC traces of the radical hydration product tetralol 5.** (a) Racemic tetralol 5. (b) Biocatalytic radical hydration of alkene **S23** with P450<sub>BM3</sub>\_QTG and PhSiMeH<sub>2</sub>.

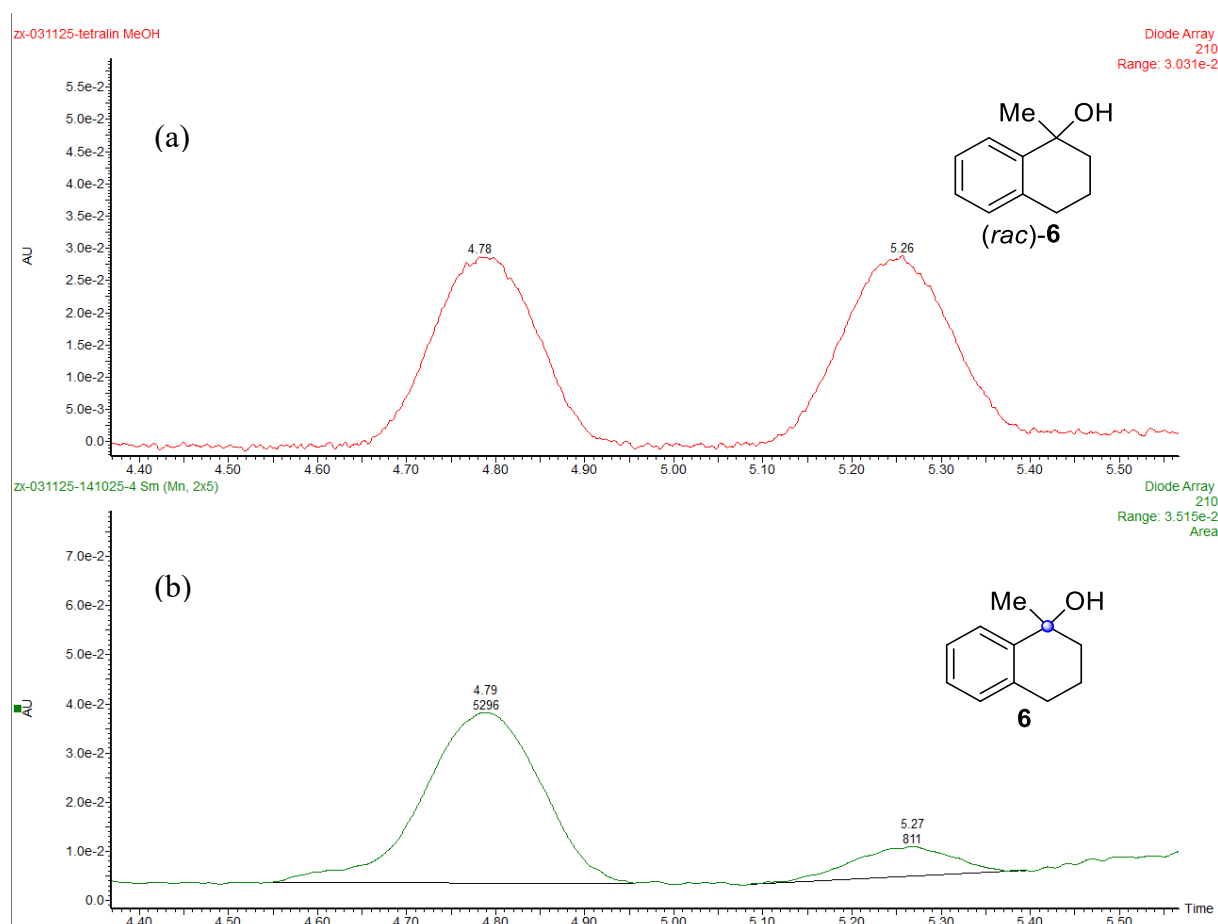

**Supplementary Fig. 51. SFC traces of the radical hydration product tetralol 6. (a)** Synthesized racemic tetralol 6. **(b)** Biocatalytic radical hydration of alkene S7 with P450<sub>BM3</sub>\_QTG and PhSiMeH<sub>2</sub>.

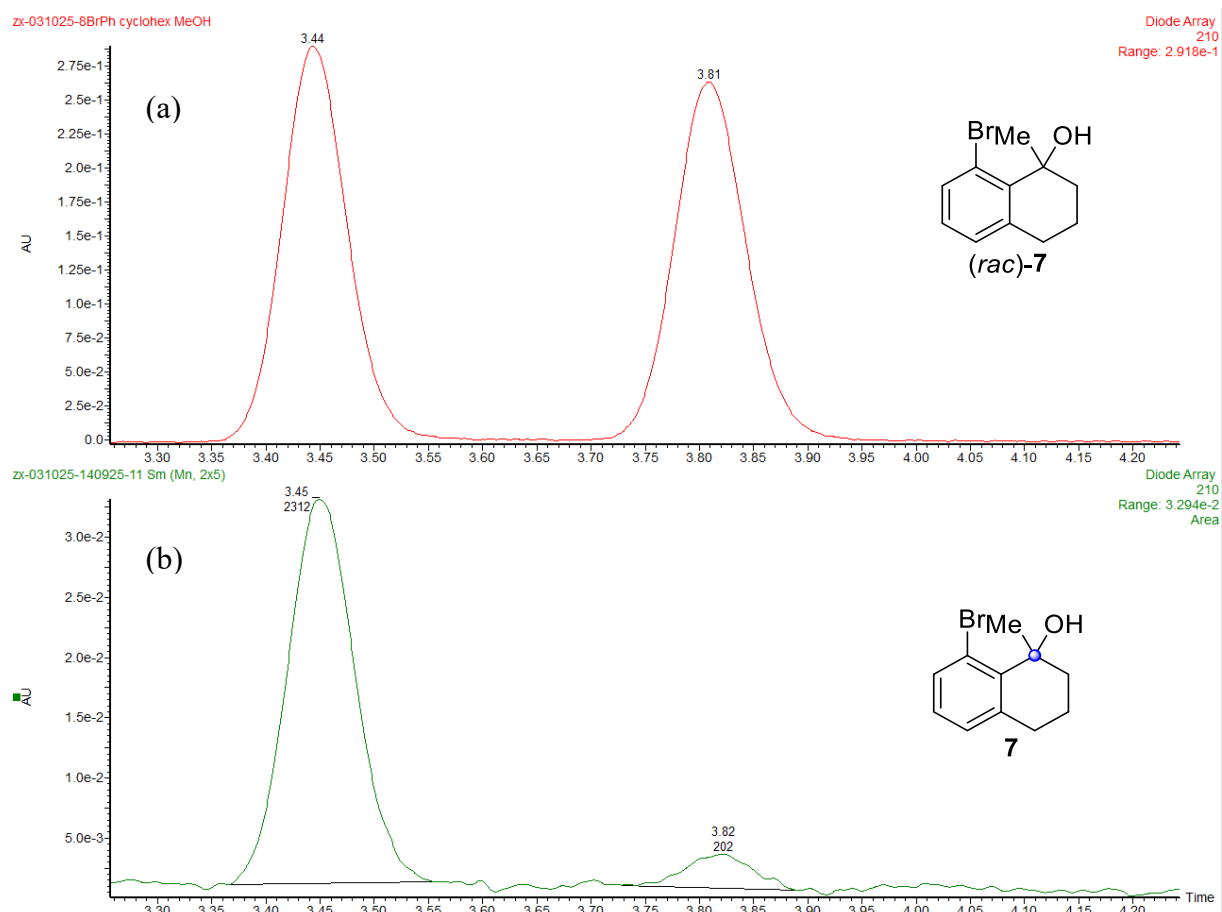

**Supplementary Fig. 52. SFC traces of the radical hydration product tetralol 7. (a) Racemic tetralol 7. (b) Biocatalytic radical hydration of alkene S8 with P450<sub>BM3</sub>\_QTG and PhSiMeH<sub>2</sub>.**

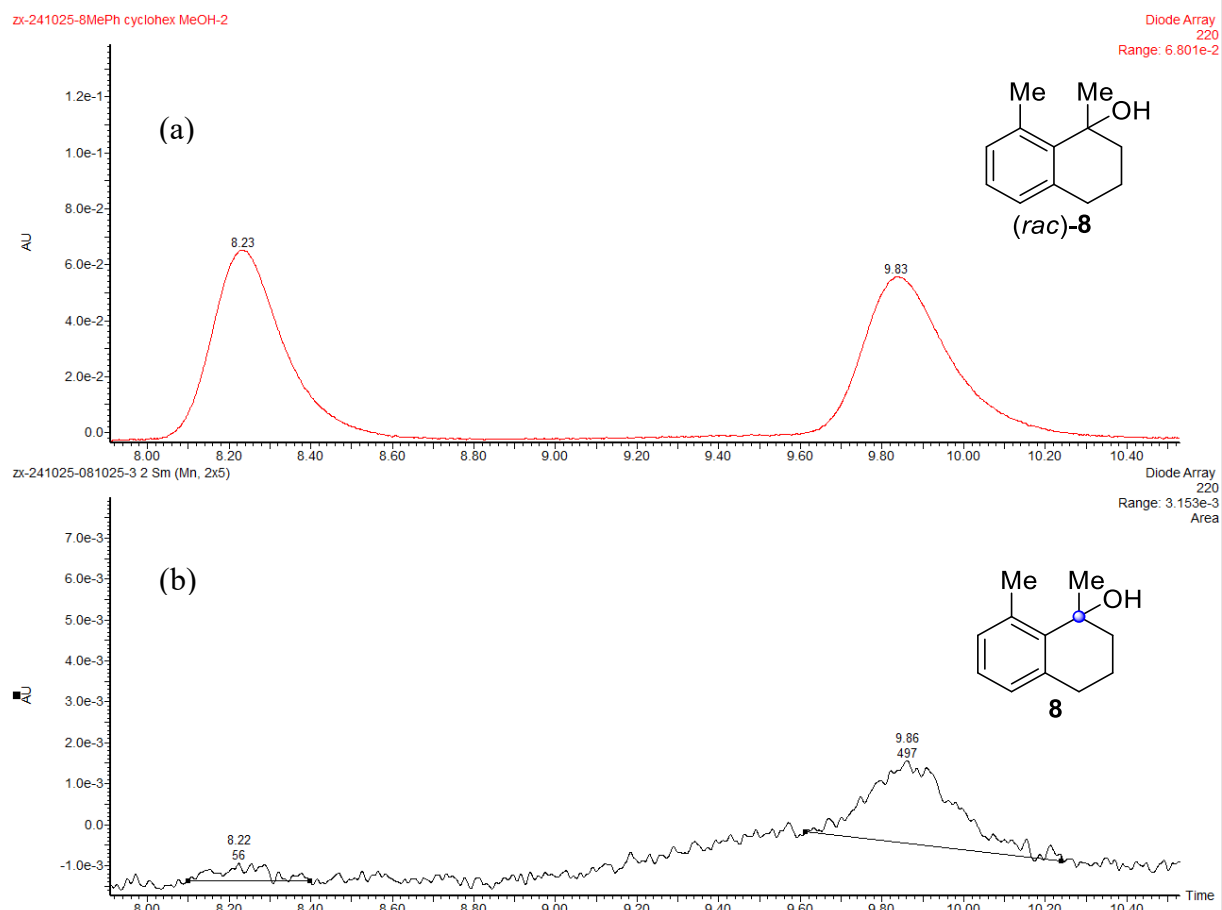

**Supplementary Fig. 53. SFC traces of the radical hydration product tetralol 8.** (a) Racemic tetralol 8. (b) Biocatalytic radical hydration of alkene S9 with P450<sub>BM3</sub>\_QTG and PhSiMeH<sub>2</sub>.

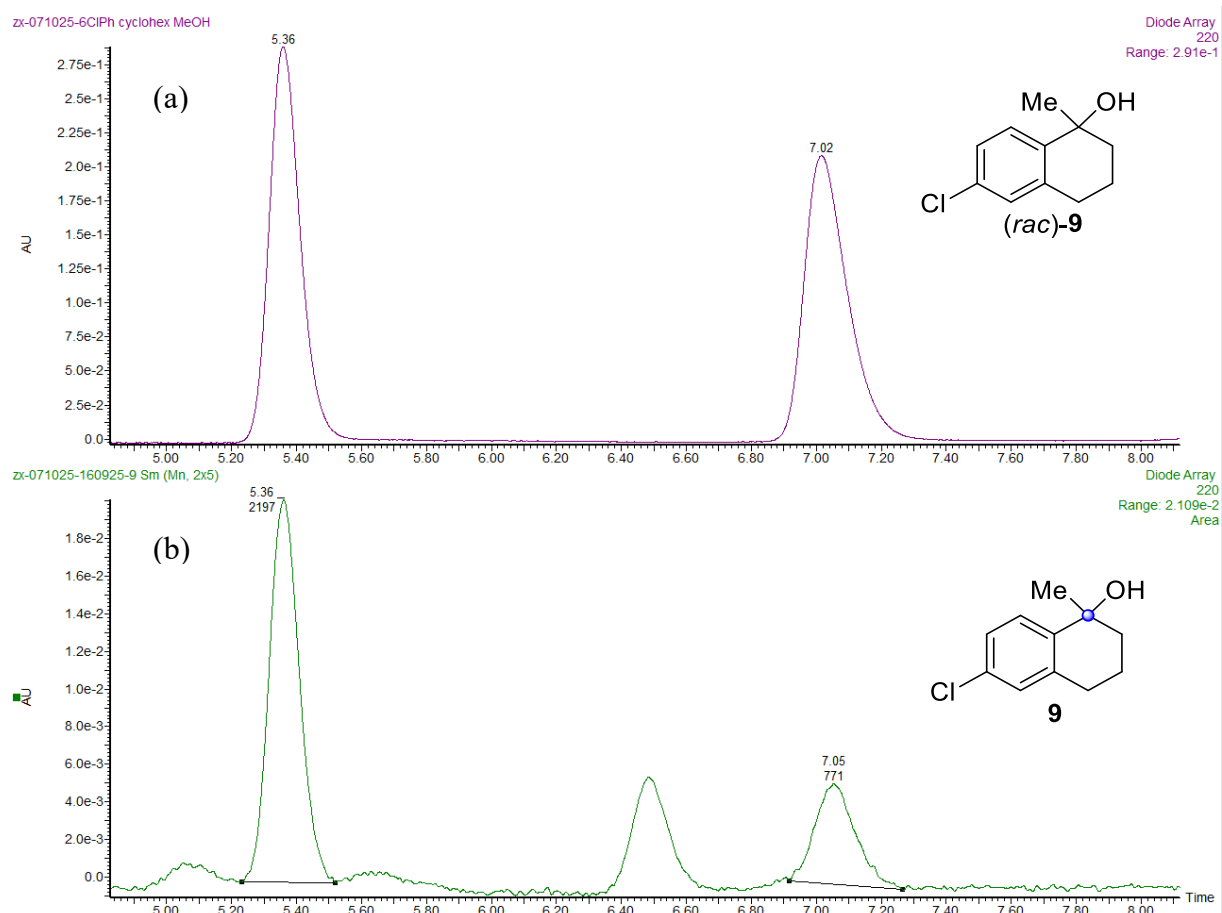

**Supplementary Fig. 54. SFC traces of the radical hydration product tetralol 9. (a) Racemic tetralol 9. (b) Biocatalytic radical hydration of alkene S10 with P450<sub>BM3</sub>\_QTG and PhSiMeH<sub>2</sub>.**

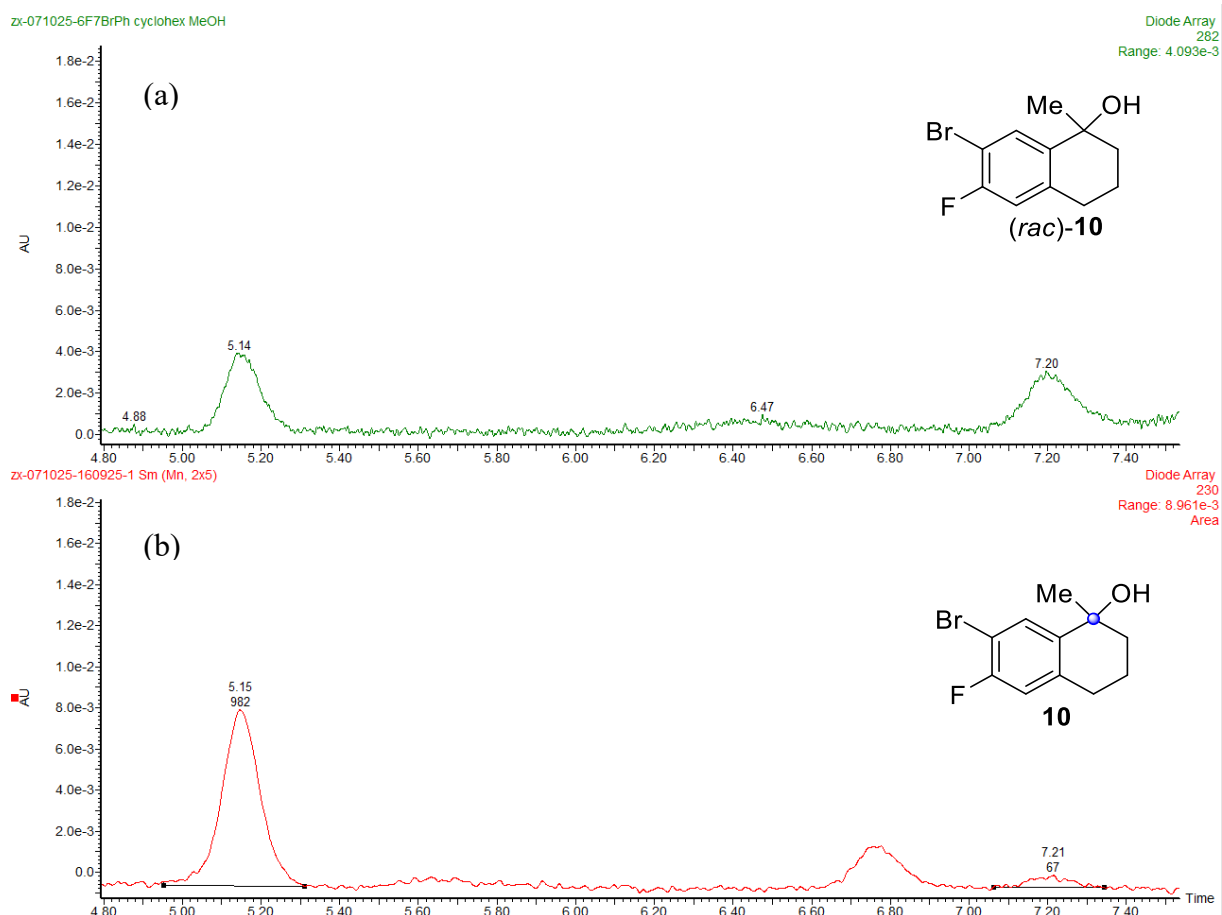

**Supplementary Fig. 55. SFC traces of the radical hydration product tetralol 10. (a) Racemic tetralol 10. (b) Biocatalytic radical hydration of alkene S11 with P450<sub>BM3</sub>\_QTG and PhSiMeH<sub>2</sub>.**

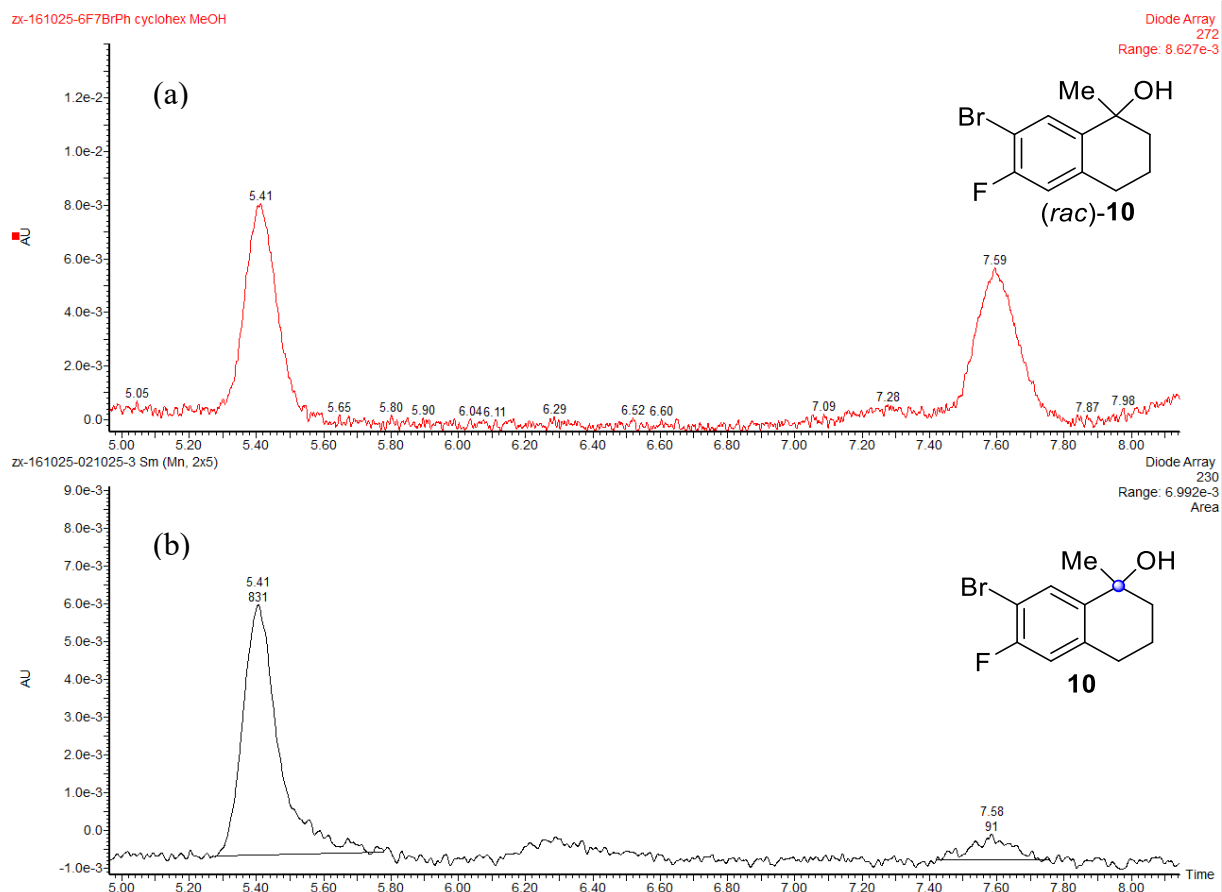

**Supplementary Fig. 56. SFC traces of the radical hydration product tetralol 10.** (a) Racemic tetralol 10. (b) Biocatalytic radical hydration of alkene **S24** with P450<sub>BM3</sub>\_QTG and PhSiMeH<sub>2</sub>.



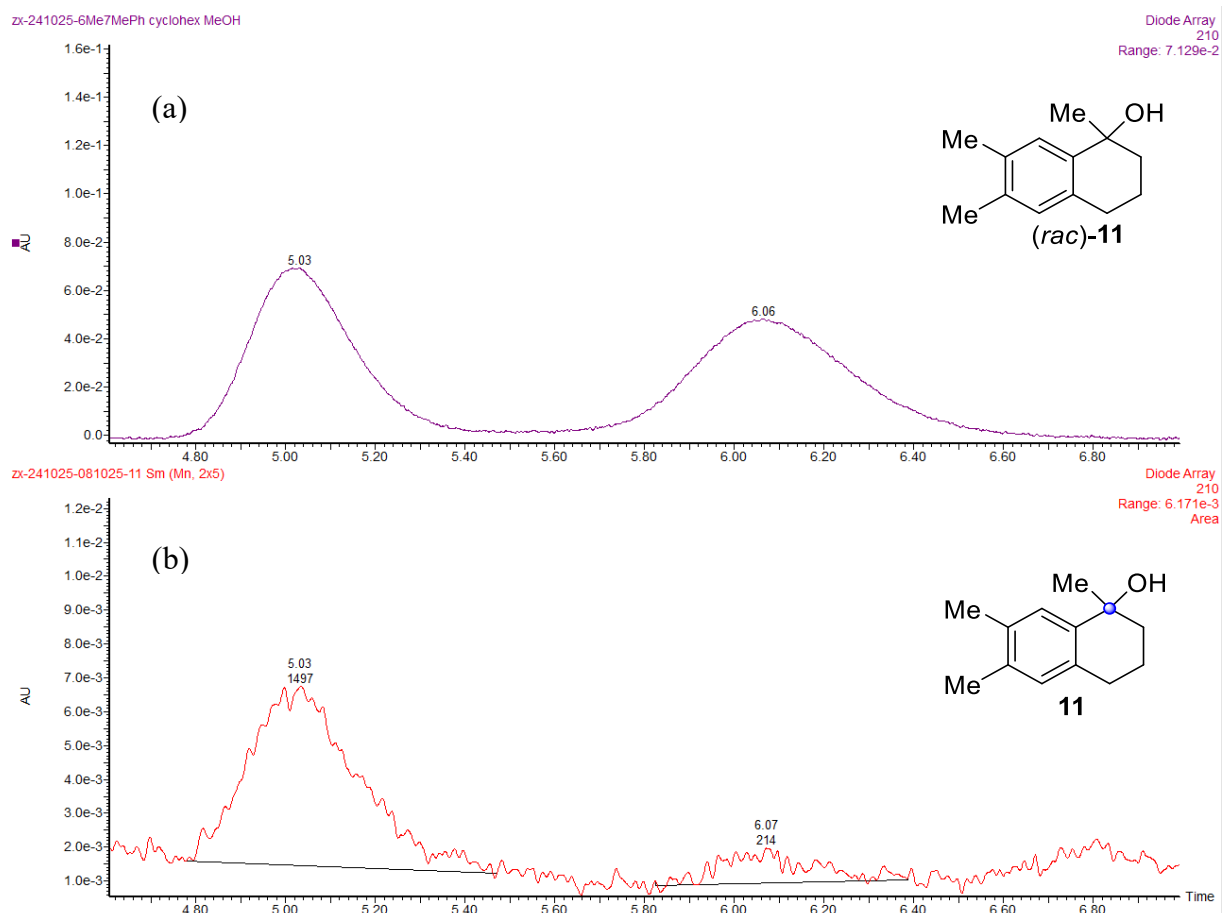

**Supplementary Fig. 57. SFC traces of the radical hydration product tetralol 11.** (a) Racemic tetralol 11. (b) Biocatalytic radical hydration of alkene S12 with P450<sub>BM3</sub>\_QTG and PhSiMeH<sub>2</sub>.

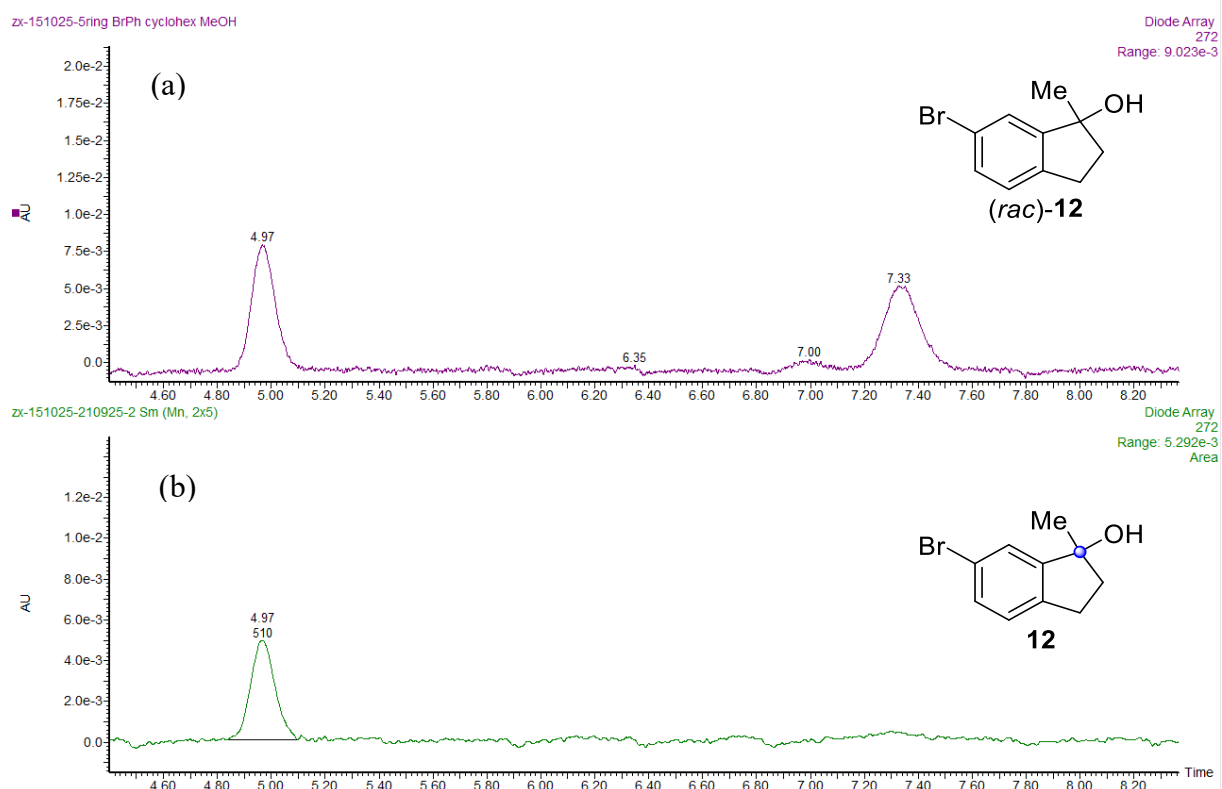

**Supplementary Fig. 58. SFC traces of the radical hydration product indanol 12.** (a) Racemic indanol 12. (b) Biocatalytic radical hydration of alkene S13 with P450<sub>BM3</sub>\_QTG and PhSiMeH<sub>2</sub>.

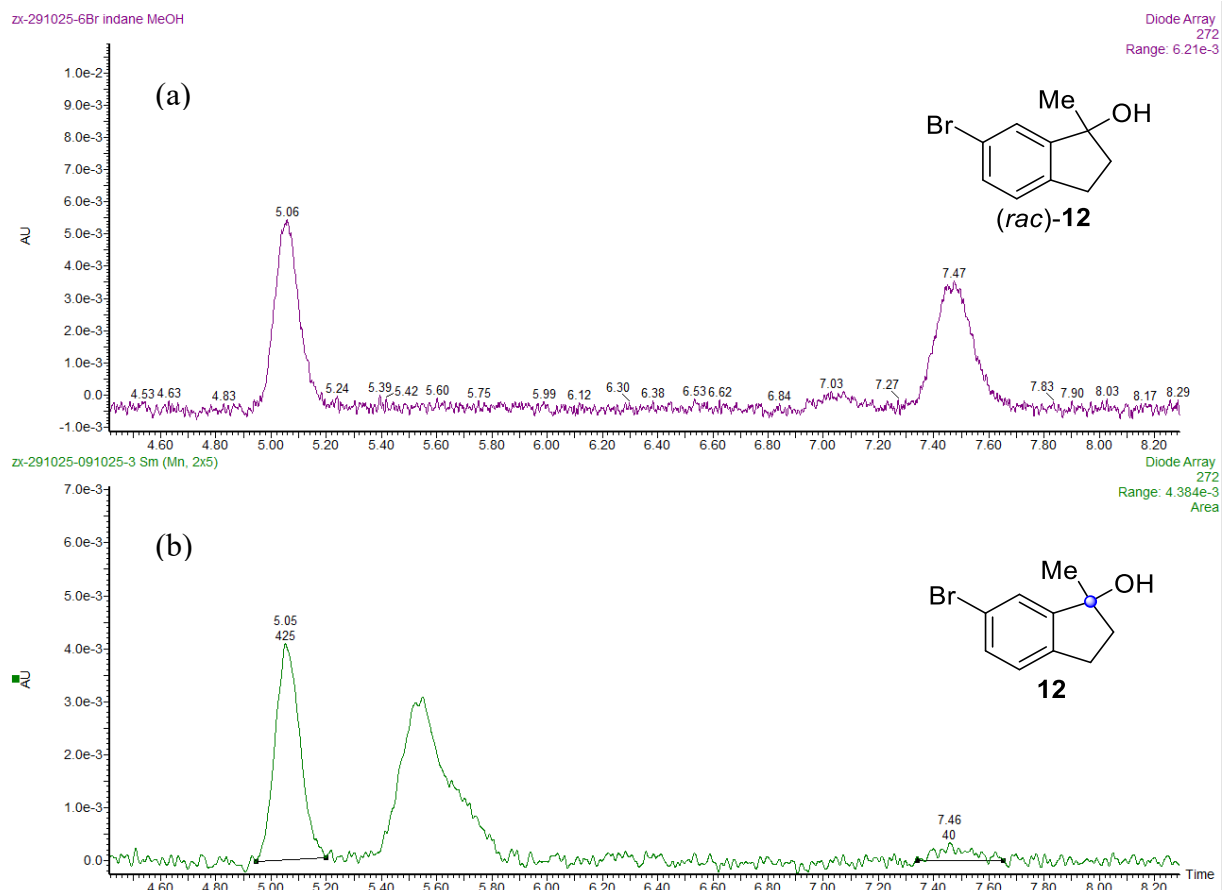

**Supplementary Fig. 59. SFC traces of the radical hydration product indanol 12. (a) Racemic indanol 12. (b) Biocatalytic radical hydration of alkene S25 with P450<sub>BM3</sub>\_QTG and PhSiMeH<sub>2</sub>.**

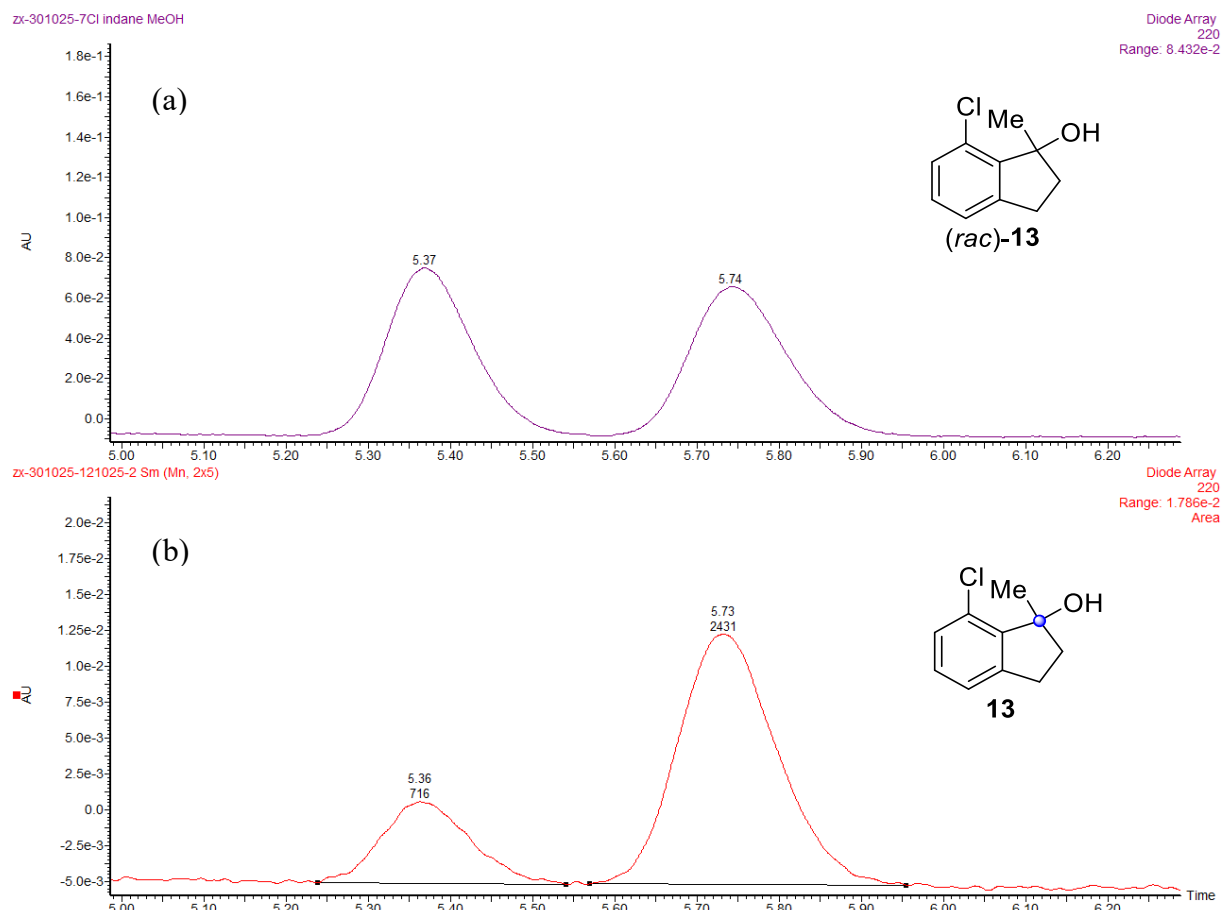

**Supplementary Fig. 60. SFC traces of the radical hydration product indanol 13.** (a) Racemic indanol 13. (b) Biocatalytic radical hydration of alkene S14 with P450<sub>BM3</sub>\_QTG and PhSiMeH<sub>2</sub>.

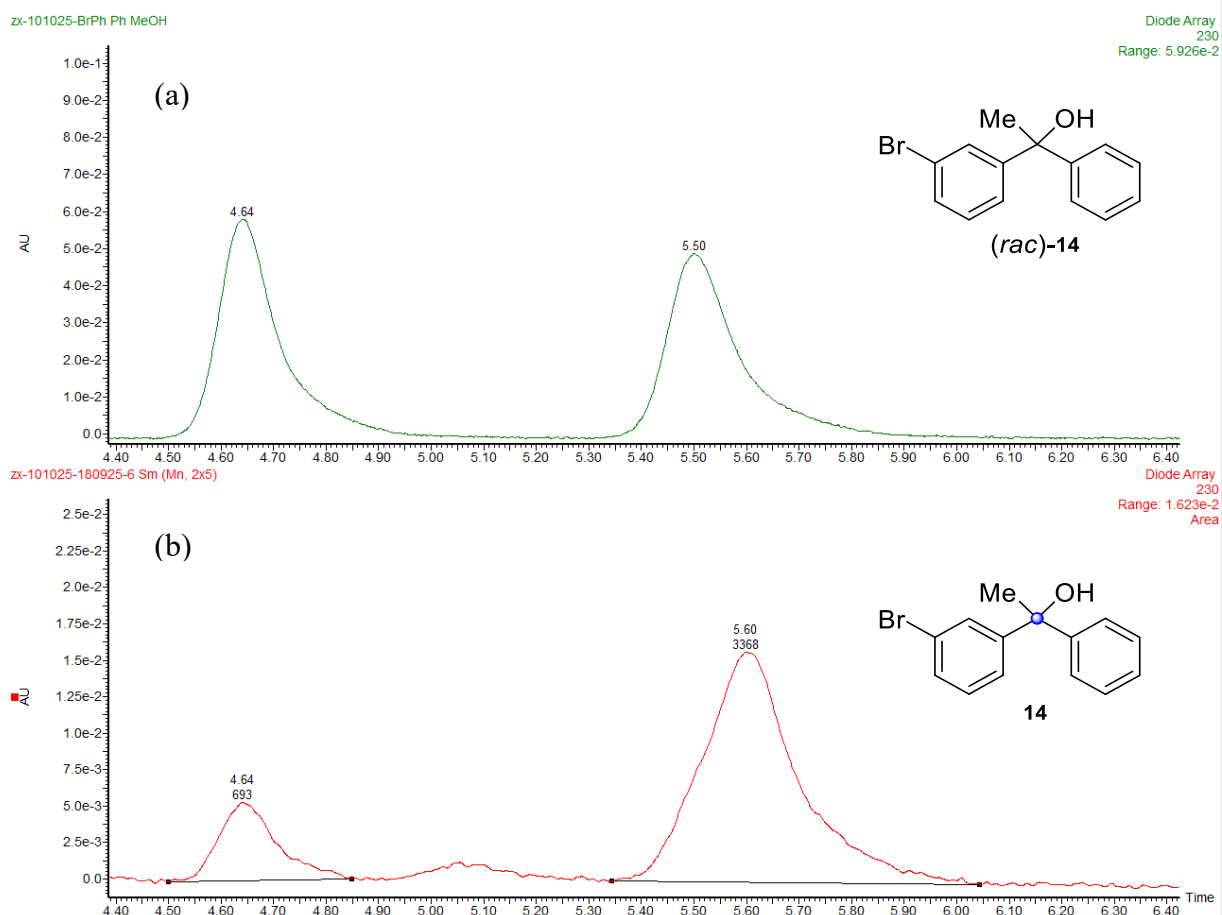

**Supplementary Fig. 61. SFC traces of the radical hydration product acyclic alcohol 14. (a)** Racemic acyclic alcohol 14. (b) Biocatalytic radical hydration of alkene S15 with P450<sub>BM3</sub>\_QTG and PhSiMeH<sub>2</sub>.

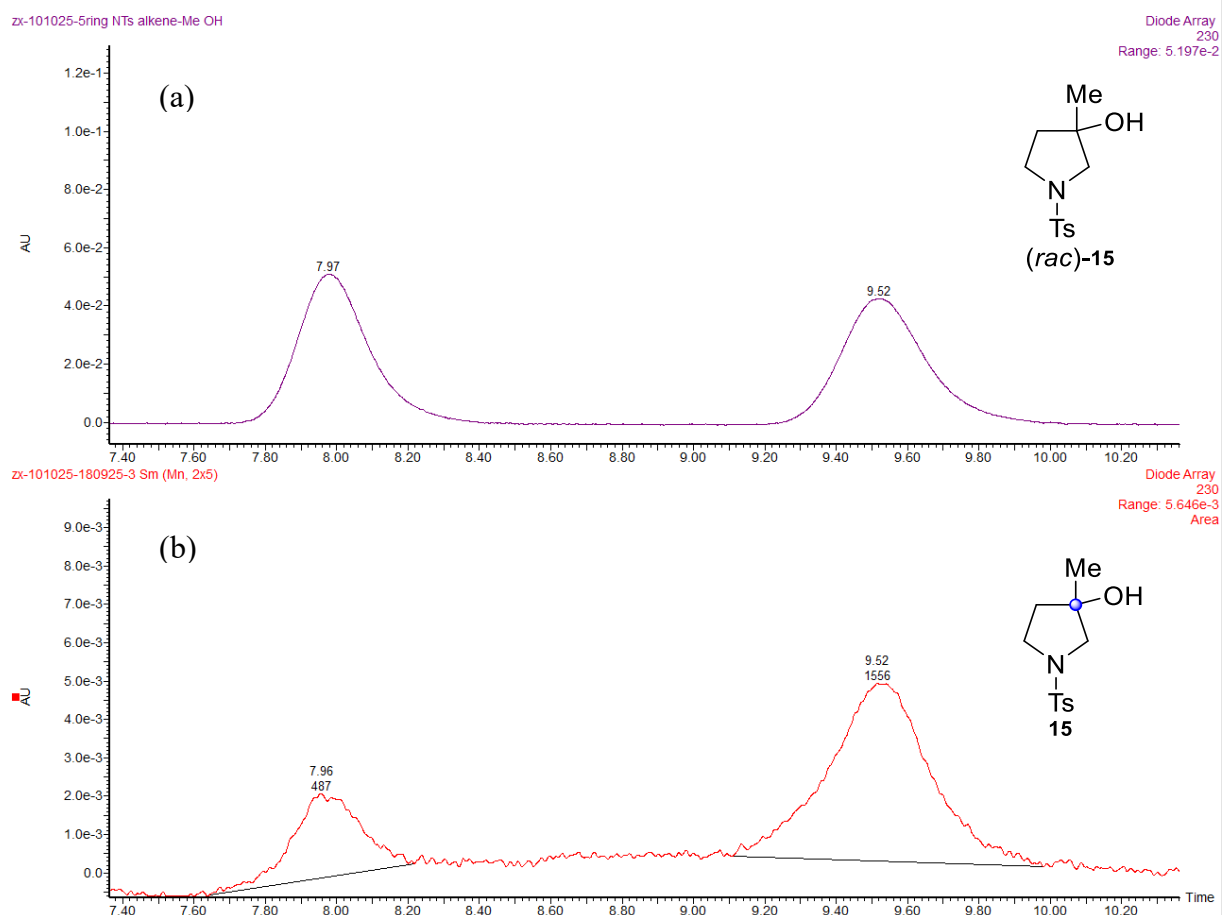

**Supplementary Fig. 62. SFC traces of the radical hydration product pyrrolidinol **15**.** (a) Racemic pyrrolidinol **15**. (b) Biocatalytic radical hydration of alkene **S16** with P450<sub>BM3</sub>\_QTG and PhSiMeH<sub>2</sub>.

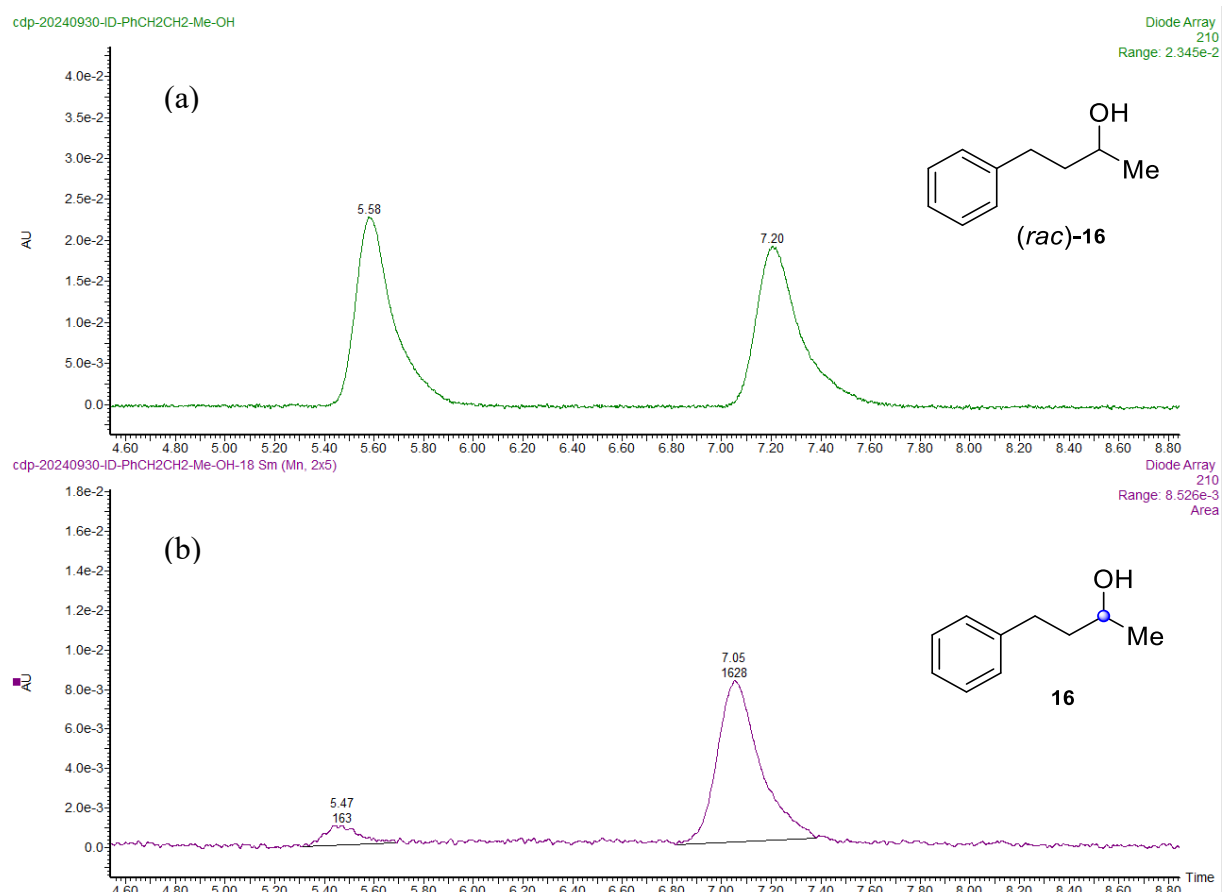

**Supplementary Fig. 63. SFC traces of the radical hydration product aliphatic alcohol 16.**  
(a) Racemic aliphatic alcohol 16. (b) Biocatalytic radical hydration of alkene S17 with P450<sub>BM3</sub>\_F87L-S72F and PhSiH<sub>3</sub>.

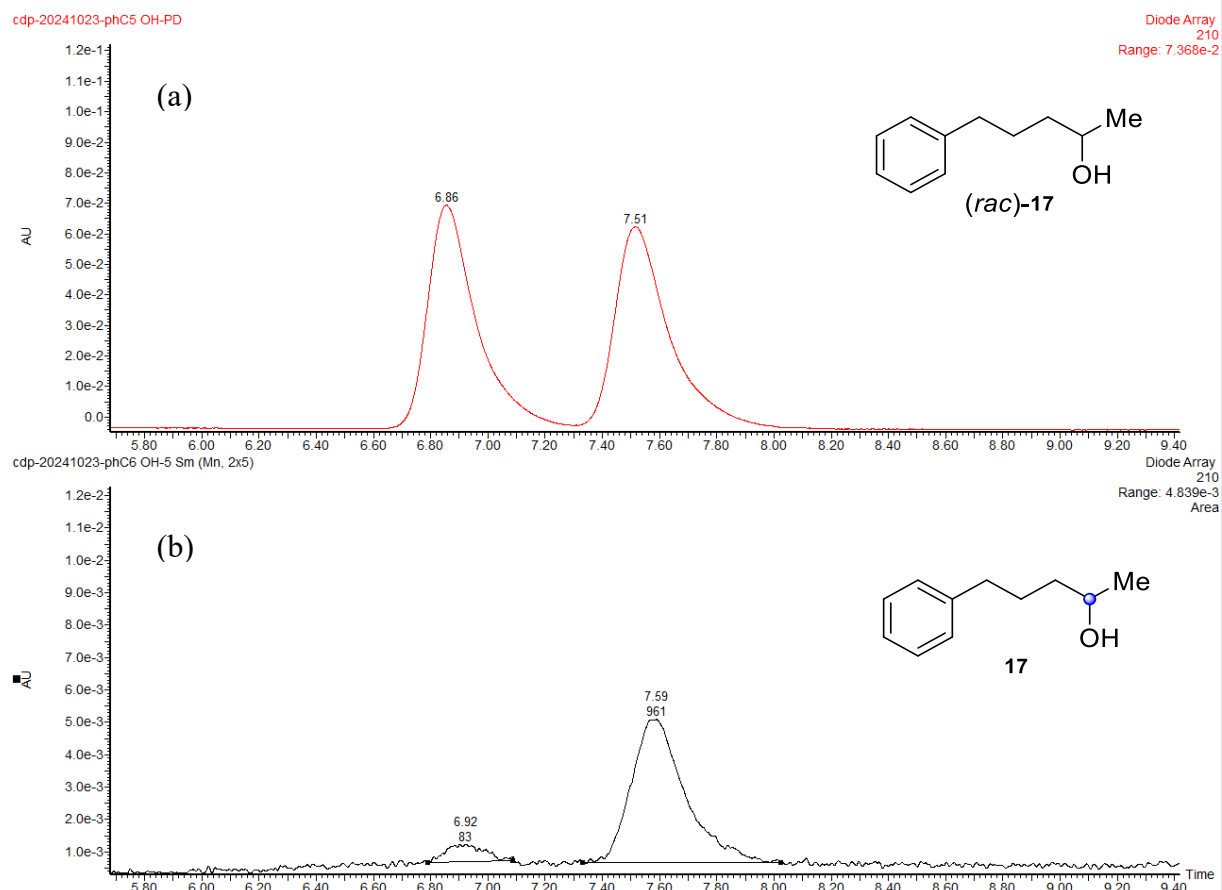

**Supplementary Fig. 64. SFC traces of the radical hydration product aliphatic alcohol 17.**  
 (a) Racemic aliphatic alcohol 17. (b) Biocatalytic radical hydration of alkene S18 with P450<sub>BM3</sub>\_F87N and PhSiH<sub>3</sub>.



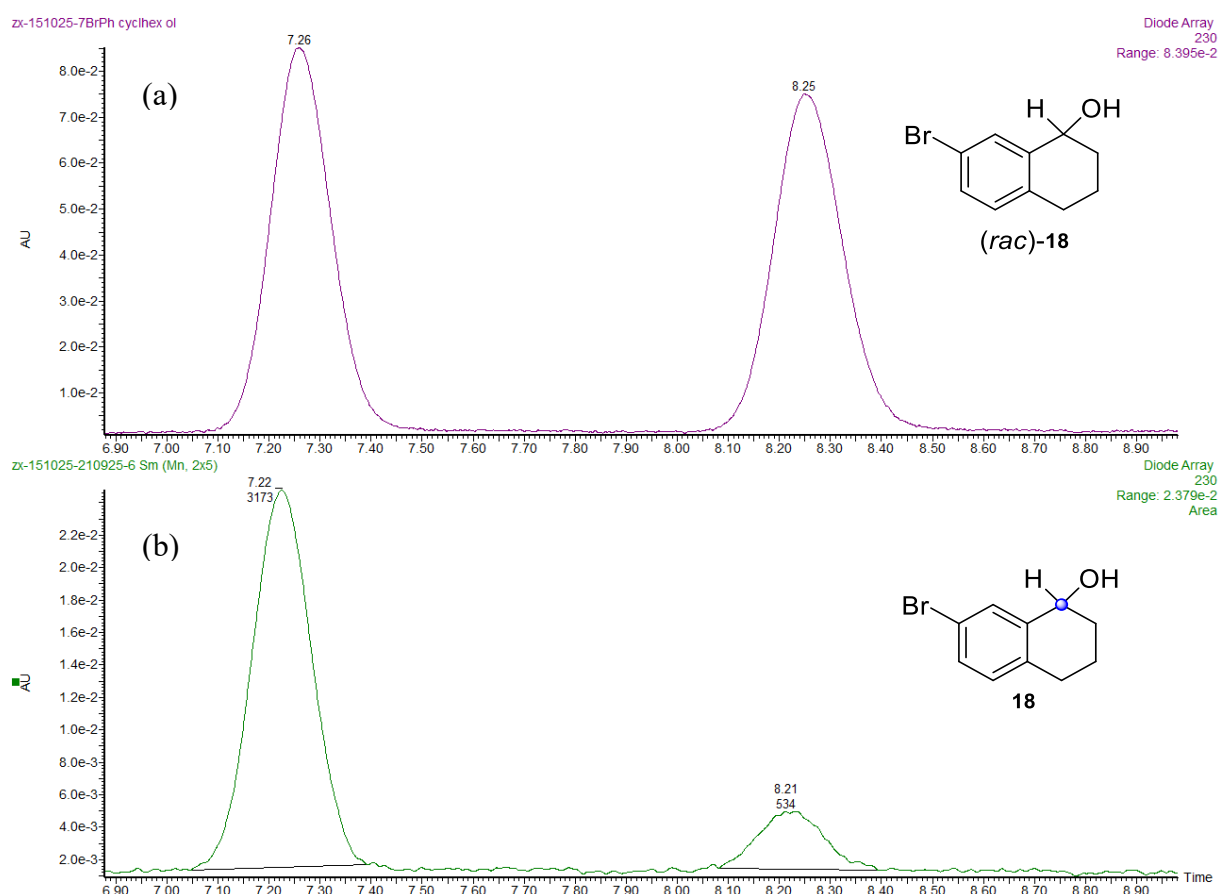

**Supplementary Fig. 65. SFC traces of the radical hydration product tetralol 18. (a) Racemic tetralol 18. (b) Biocatalytic radical hydration of alkene S19 with P450<sub>BM3</sub>\_QTG and PhSiMeH<sub>2</sub>.**

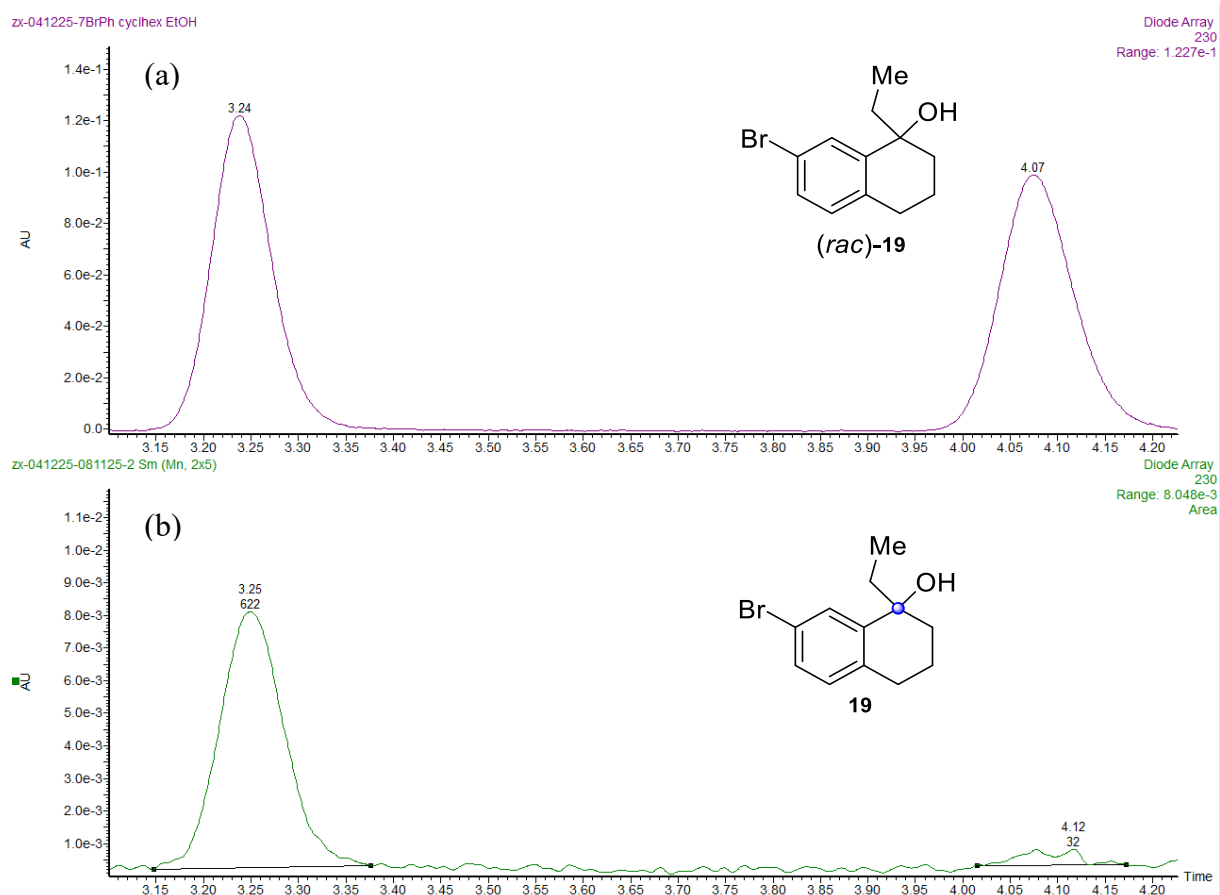

**Supplementary Fig. 66. SFC traces of the radical hydration product tetralol 19. (a)** Racemic tetralol 19. **(b)** Biocatalytic radical hydration of alkene **S26** with P450<sub>BM3</sub>\_QTG and PhSiMeH<sub>2</sub>.

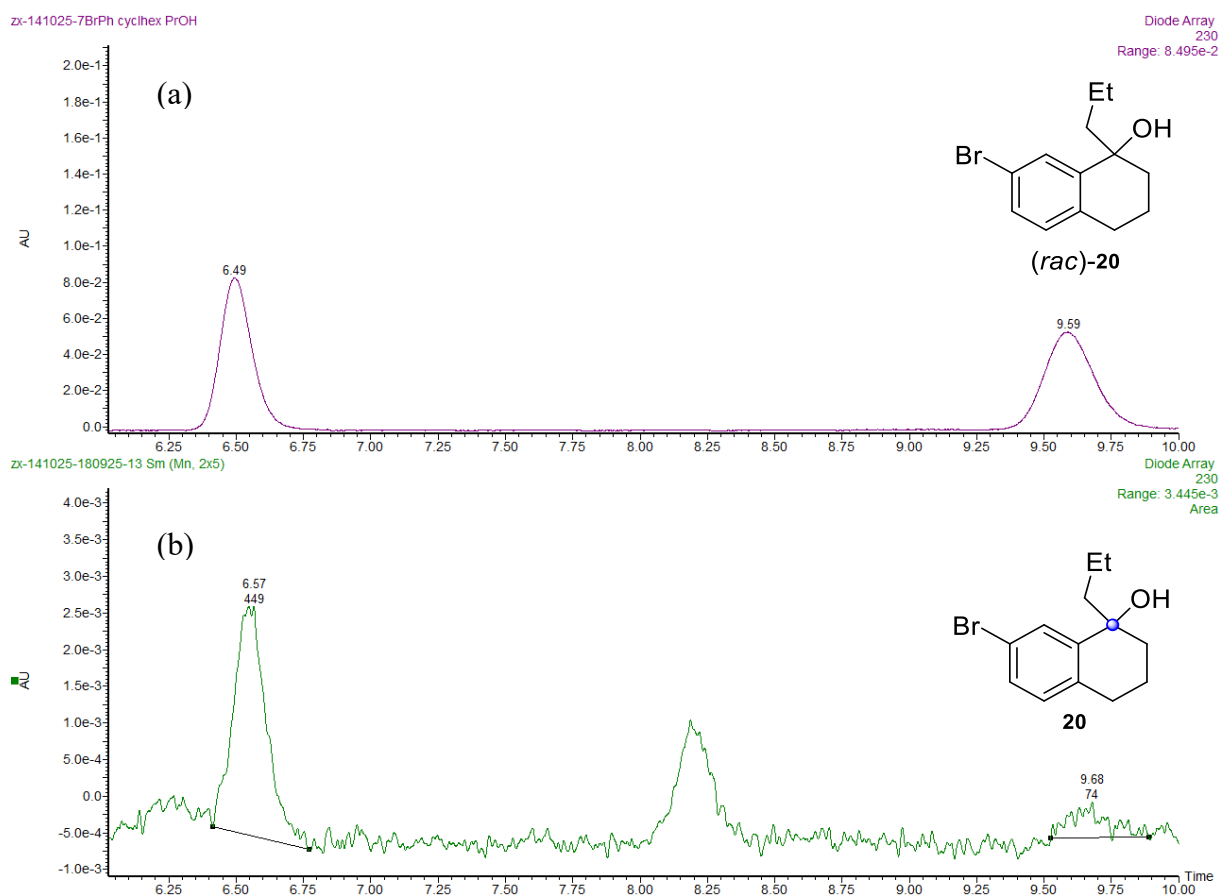

**Supplementary Fig. 67. SFC traces of the radical hydration product tetralol 20. (a)** Synthesized racemic tetralol 20. **(b)** Biocatalytic radical hydration of alkene S27 with P450<sub>BM3</sub>\_QTG and PhSiMeH<sub>2</sub>.

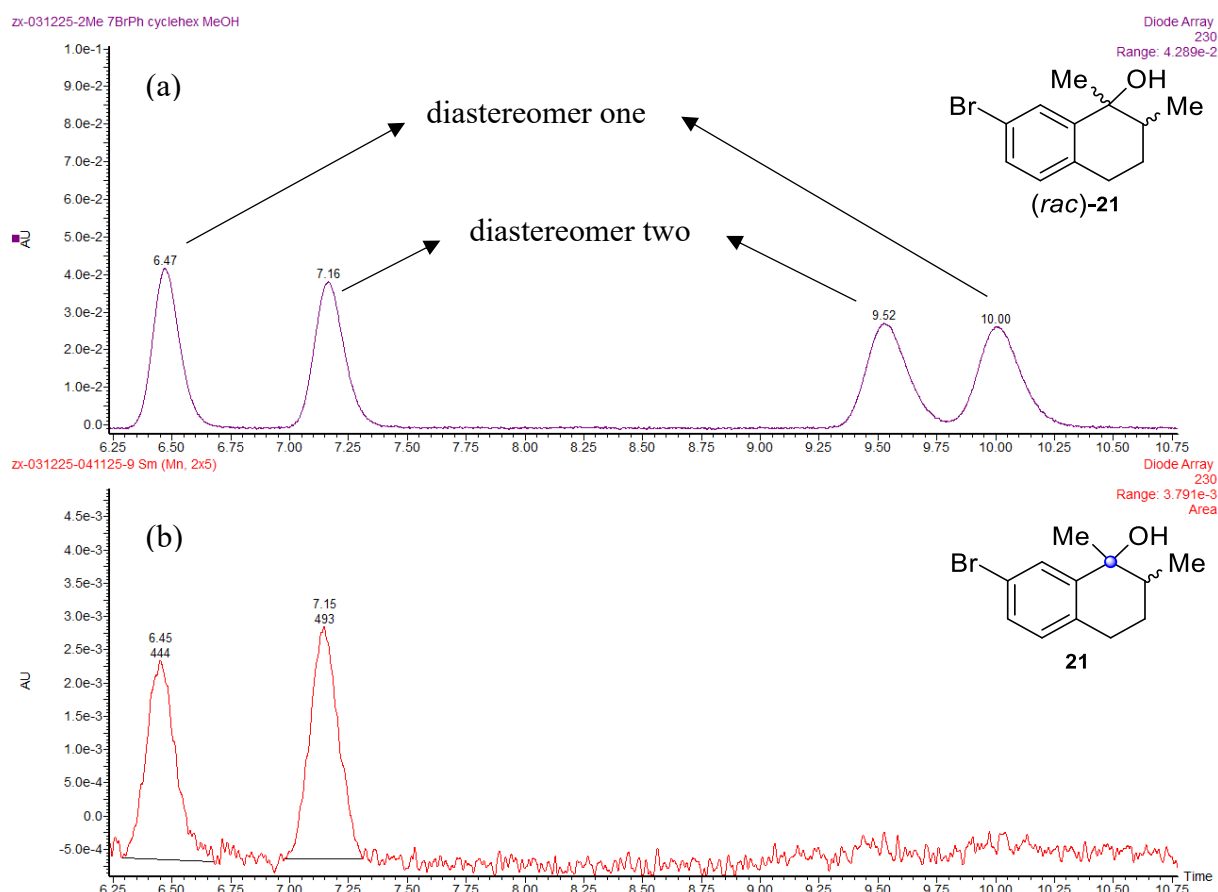

**Supplementary Fig. 68. SFC traces of the radical hydration product tetralol 21. (a)** Racemic tetralol 21. **(b)** Biocatalytic radical hydration of alkene S28 with P450<sub>BM3</sub>\_QTG and PhSiMeH<sub>2</sub>.

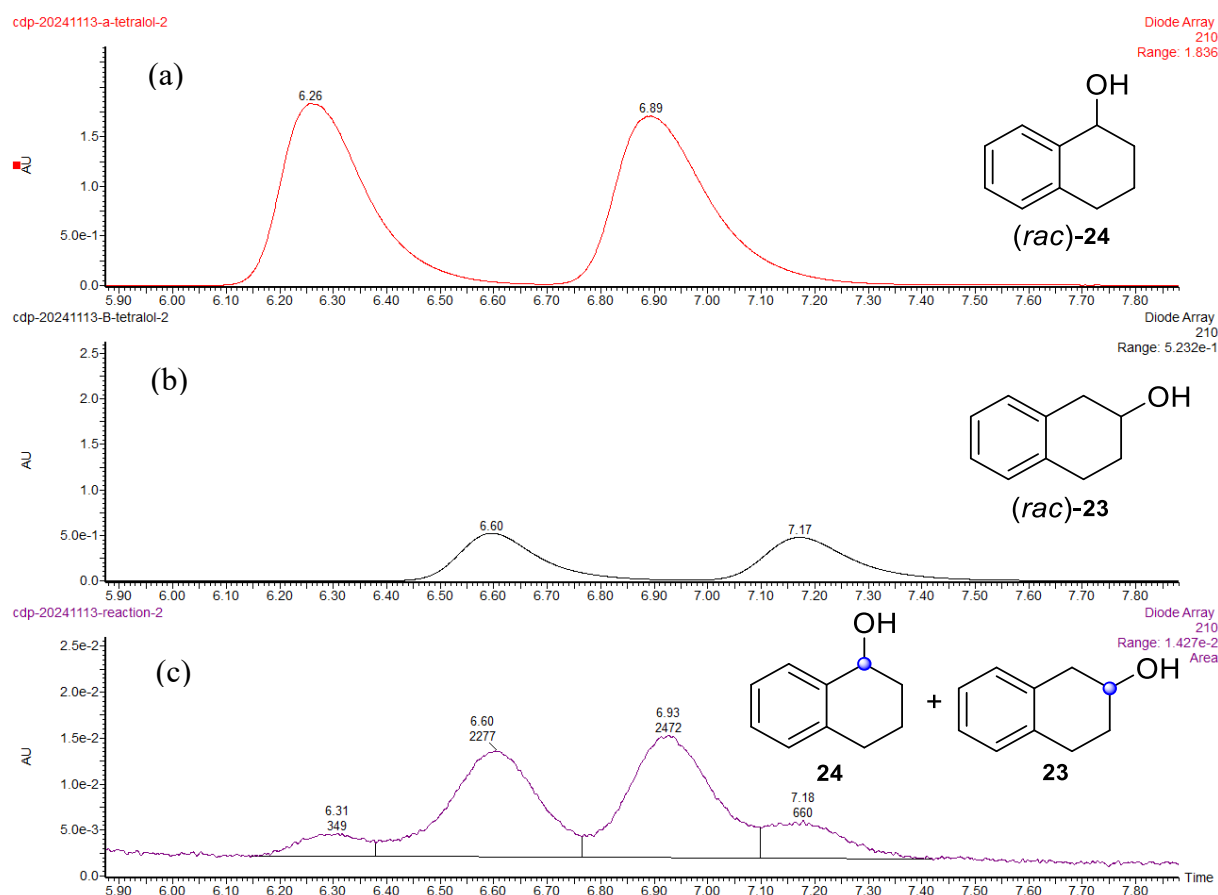

**Supplementary Fig. 69. SFC traces of the radical hydration product tetralols 23 and 24.** (a) Racemic tetralol **24**. (b) Racemic tetralol **23**. (c) Biocatalytic reaction of alkene **22** with P450<sub>BM3</sub>\_QTG and PhSiMeH<sub>2</sub>, highlighting the formation of a mixture of regioisomers **24** and **23** (**24**:**23** = 2.3:1), which result from a radical migration following radical addition of dioxygen.

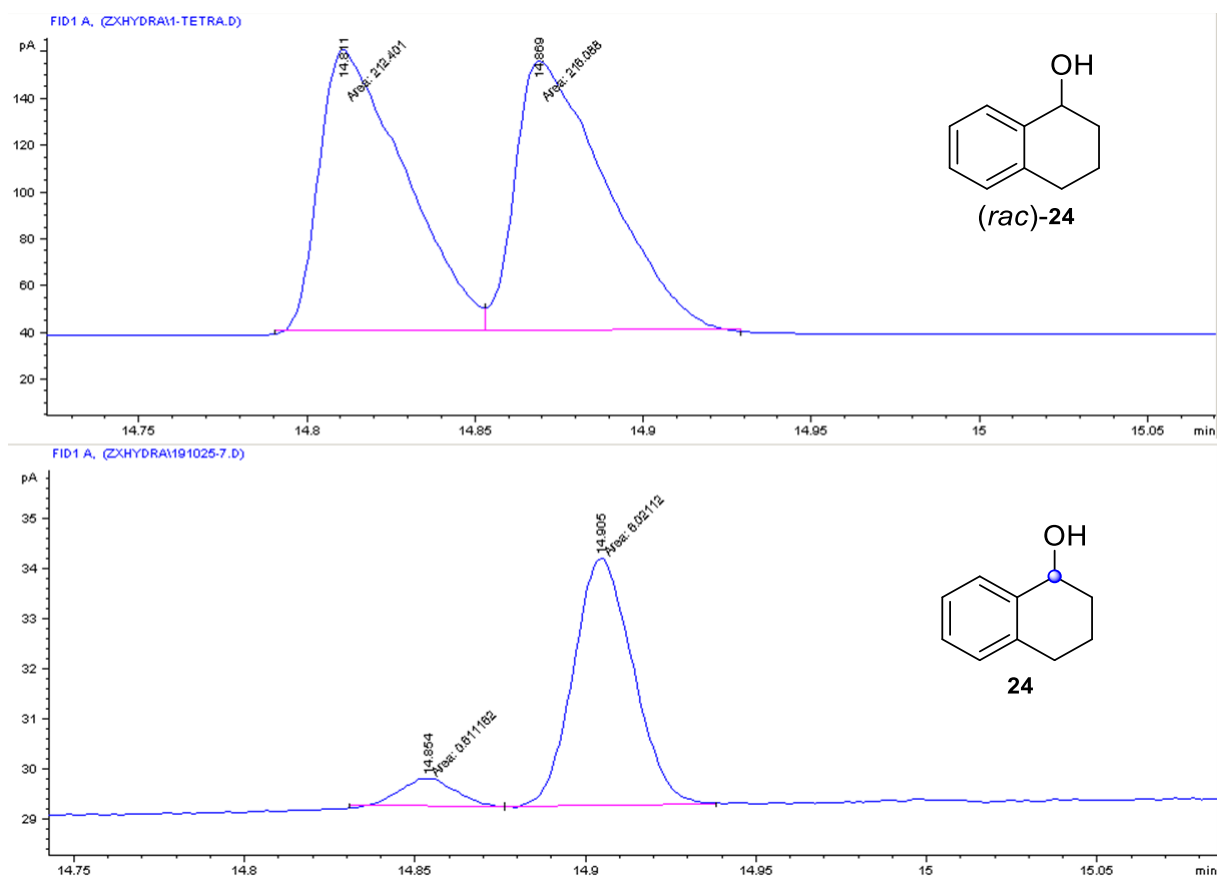

**Supplementary Fig. 70. GC traces of the radical hydration product tetralol 24.** (a) Racemic tetralol **24**. (b) Biocatalytic radical hydration of alkene **22** with P450<sub>BM3</sub>\_QTG and PhSiMeH<sub>2</sub>.

## 8. NMR spectra

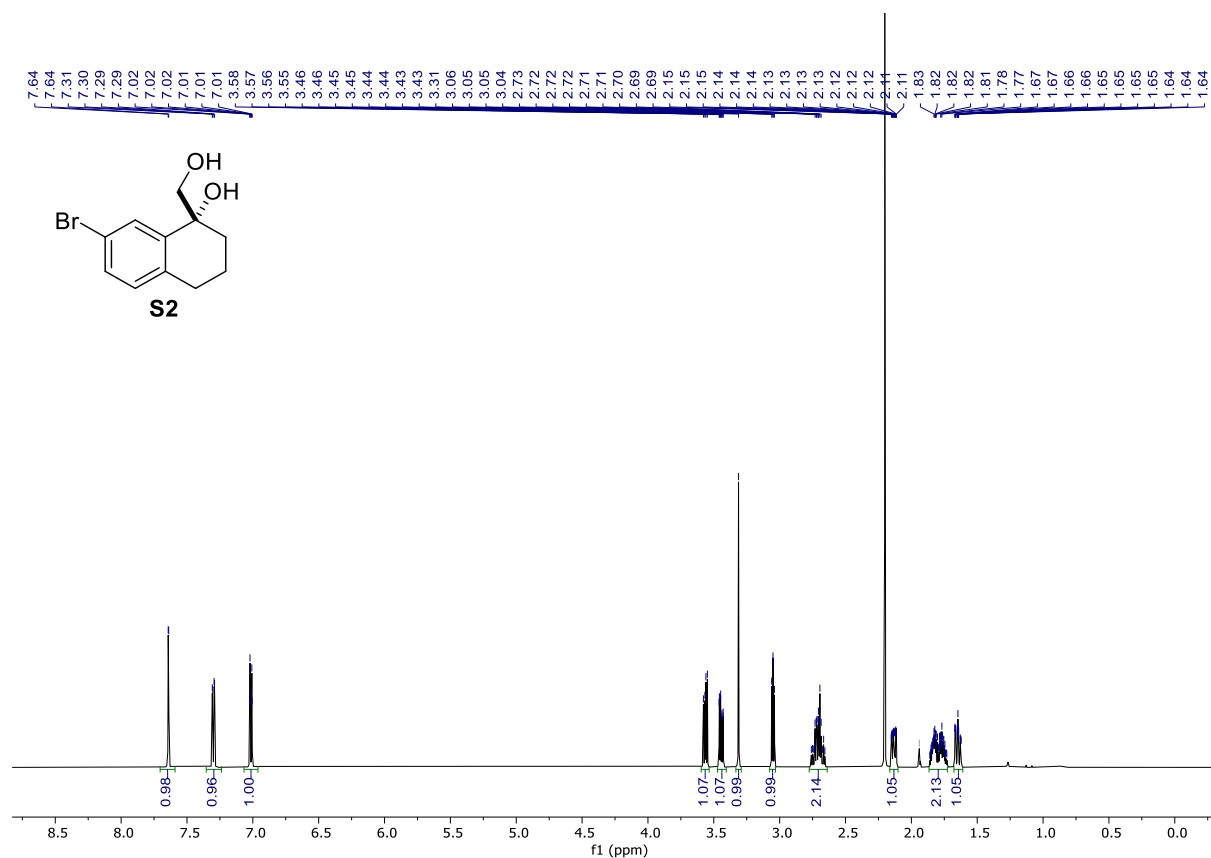

Supplementary Fig. 71. <sup>1</sup>H NMR Spectrum of diol S2 (CD<sub>3</sub>CN, 600 MHz, 20 °C)

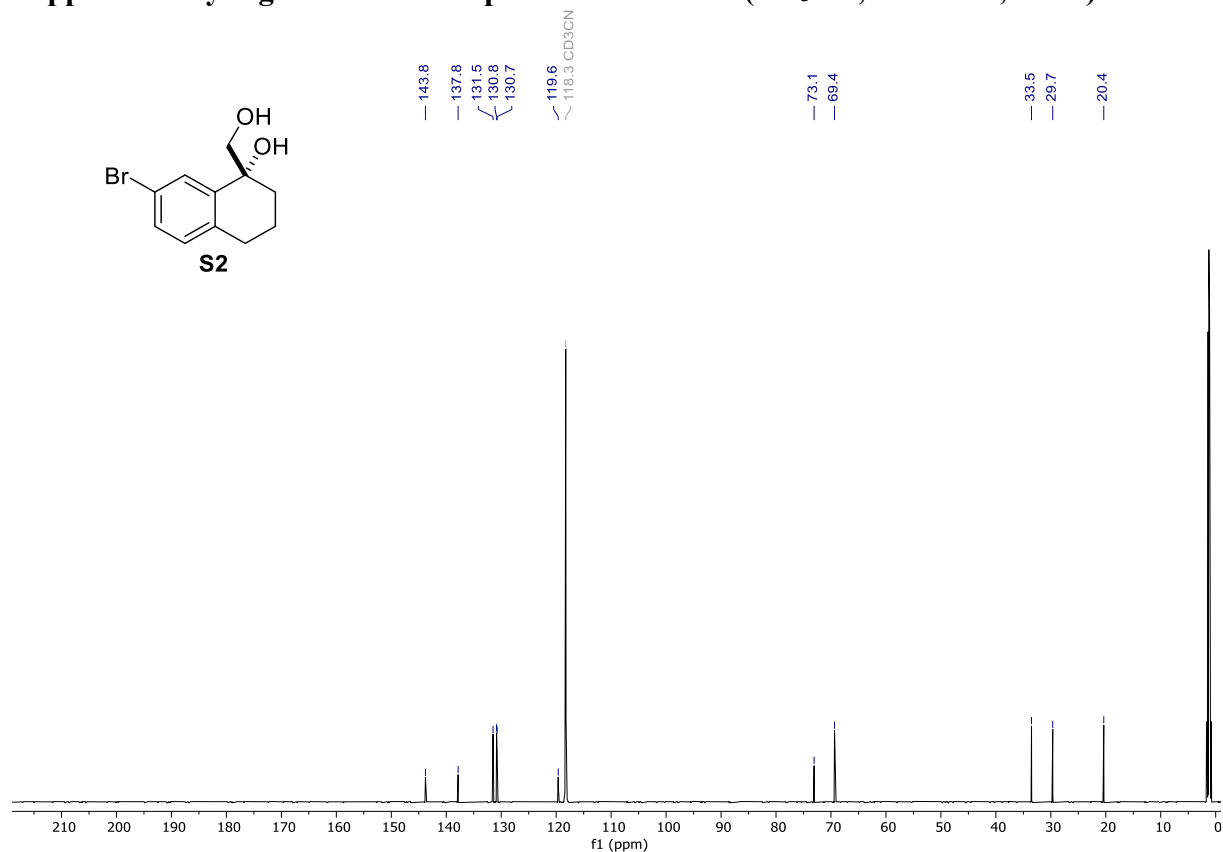

Supplementary Fig. 72. <sup>13</sup>C NMR Spectrum of diol S2 (CD<sub>3</sub>CN, 151 MHz, 20 °C)

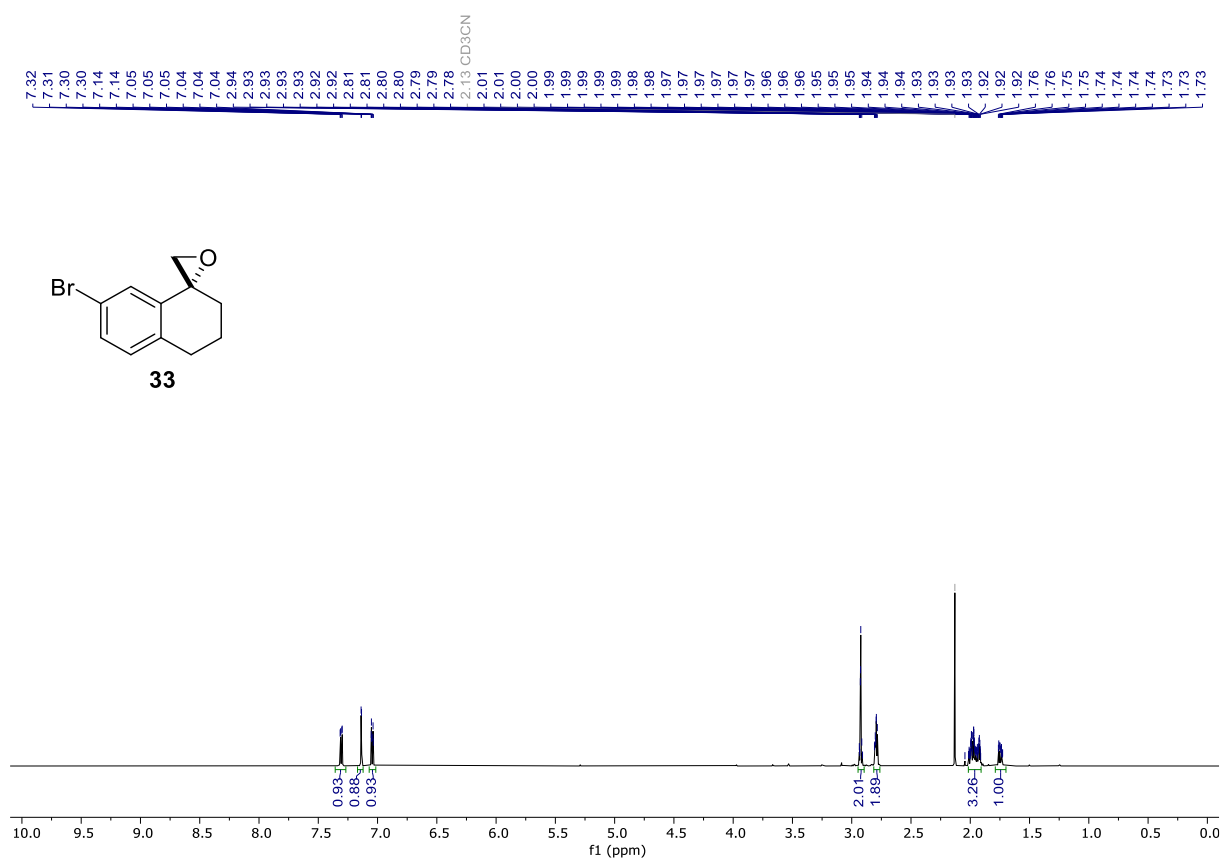

**Supplementary Fig. 73.  $^1\text{H}$  NMR Spectrum of epoxide 33 ( $\text{CD}_3\text{CN}$ , 600 MHz, 20  $^\circ\text{C}$ )**

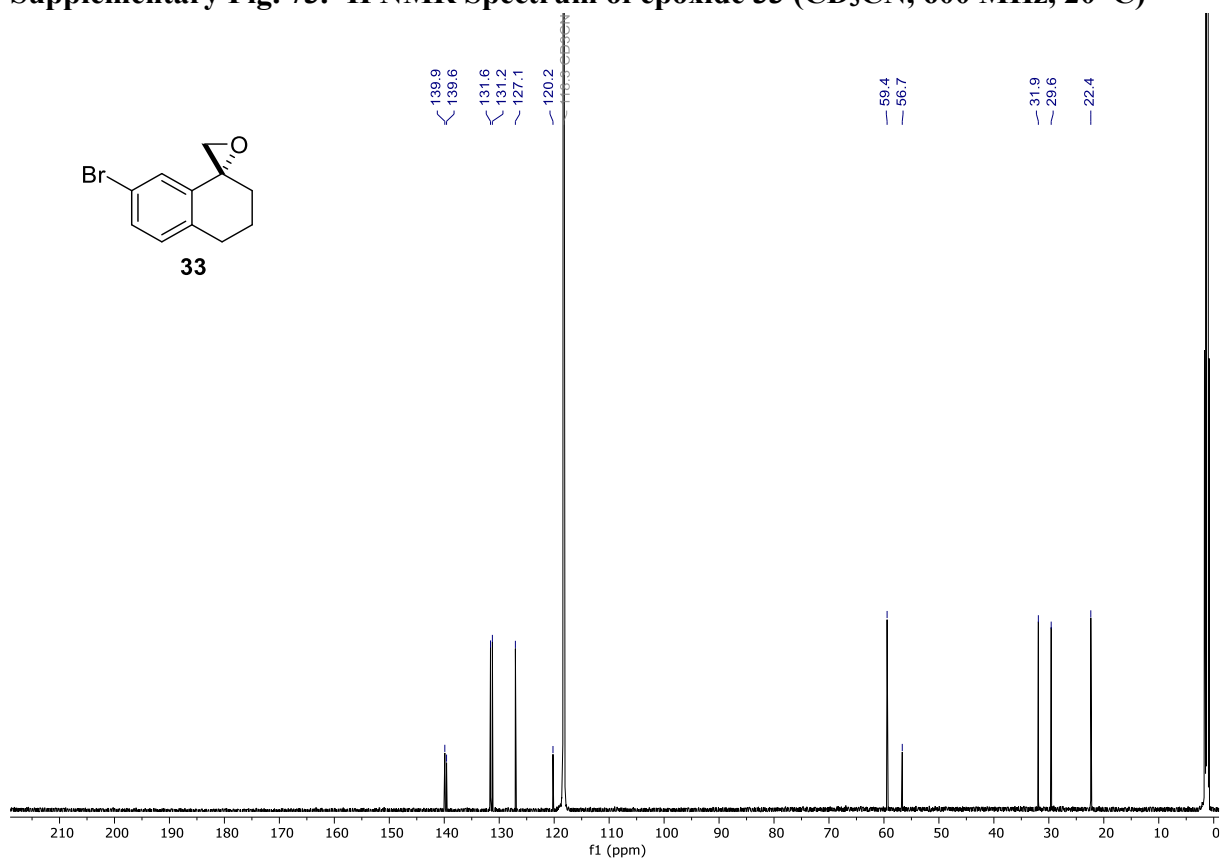

**Supplementary Fig. 74.  $^{13}\text{C}$  NMR Spectrum of epoxide 33 ( $\text{CD}_3\text{CN}$ , 151 MHz, 20  $^\circ\text{C}$ )**



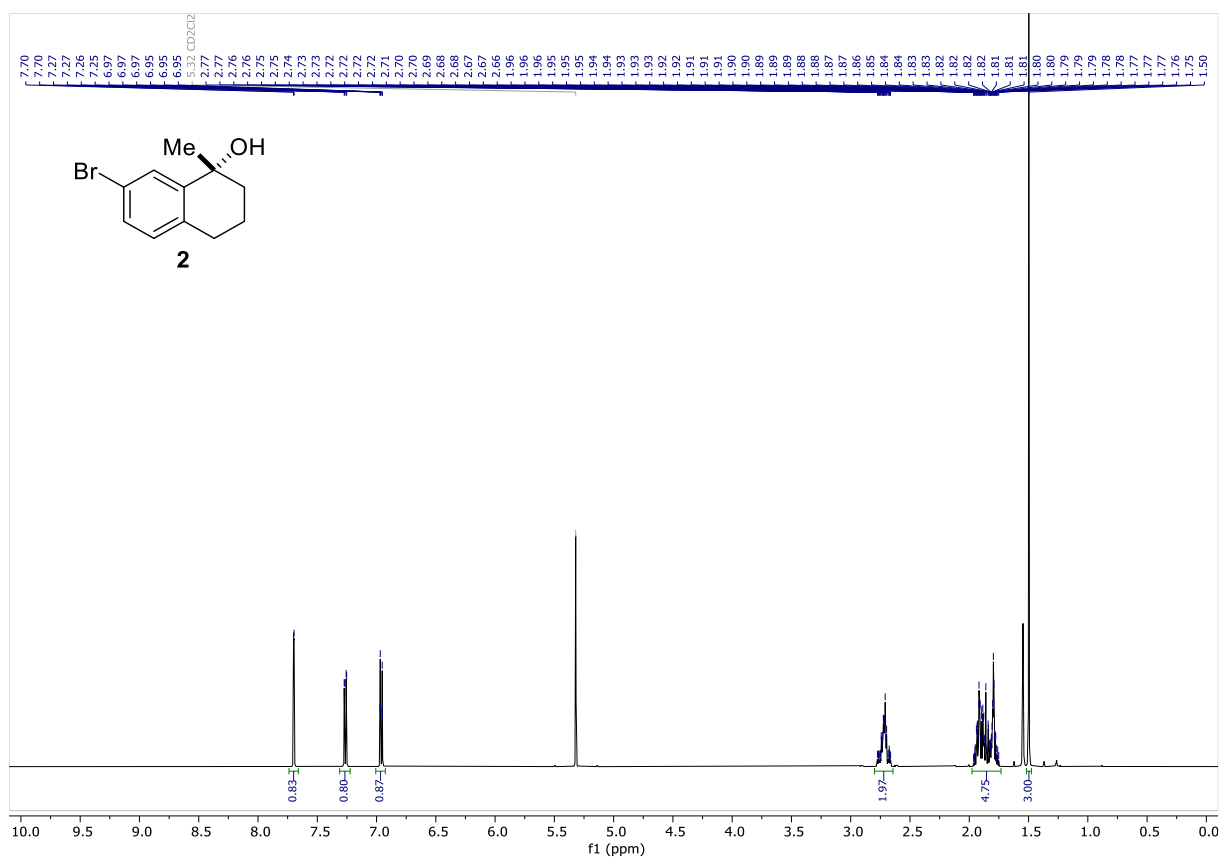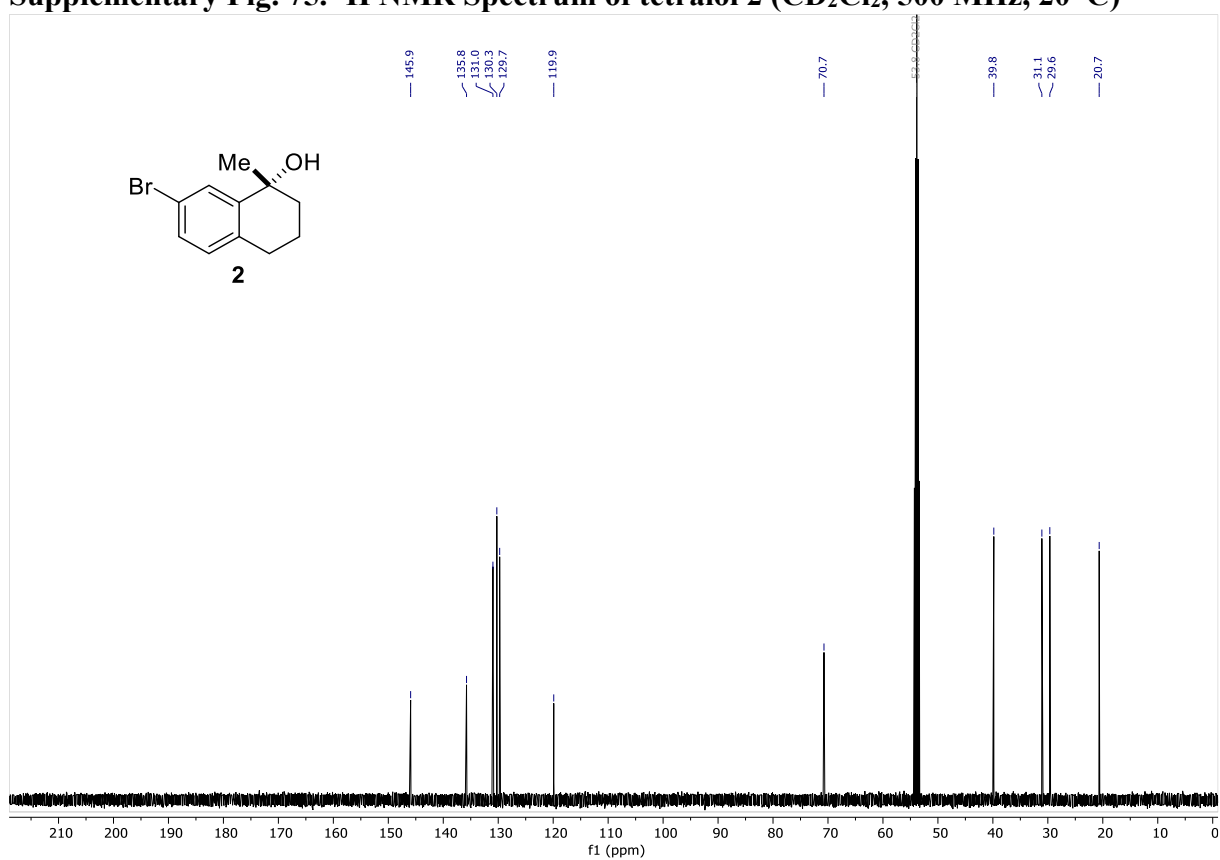

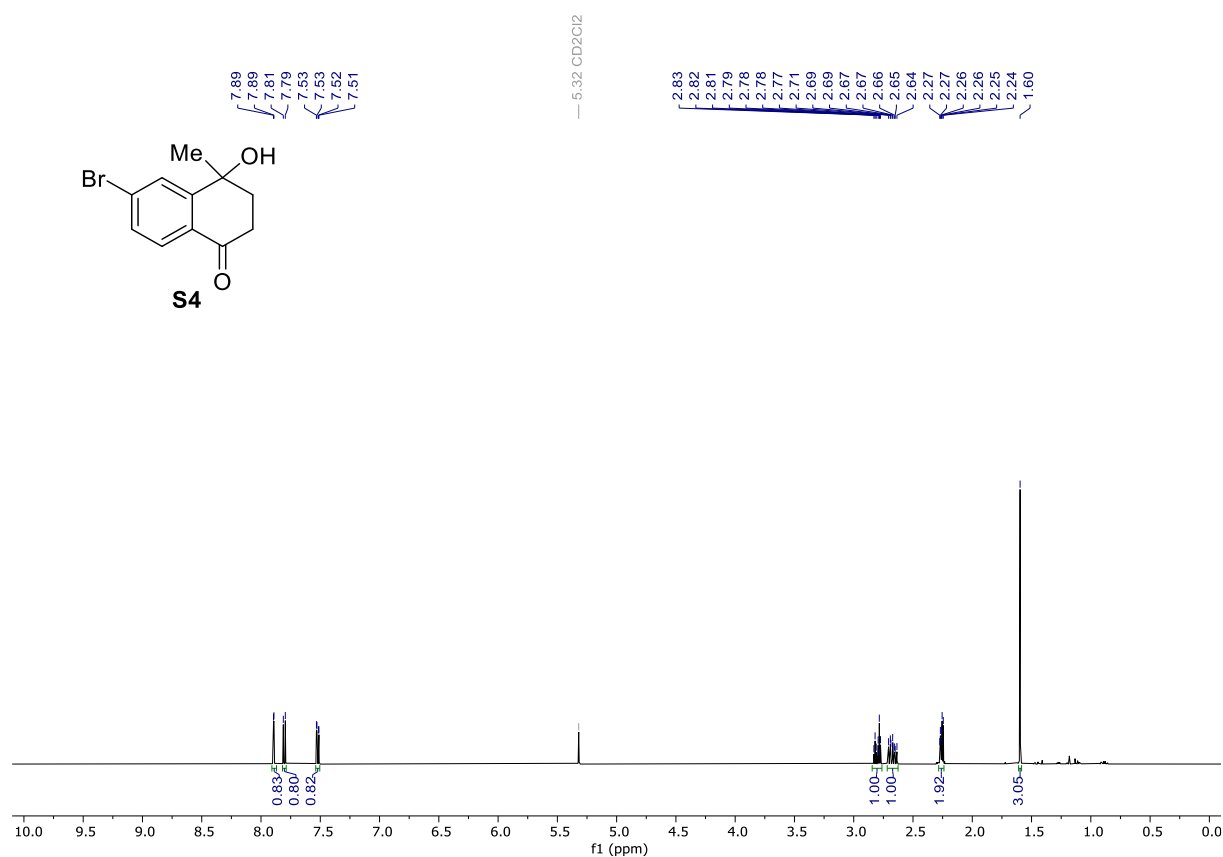

Supplementary Fig. 77. <sup>1</sup>H NMR Spectrum of ketone S4 (CD<sub>2</sub>Cl<sub>2</sub>, 500 MHz, 20 °C)

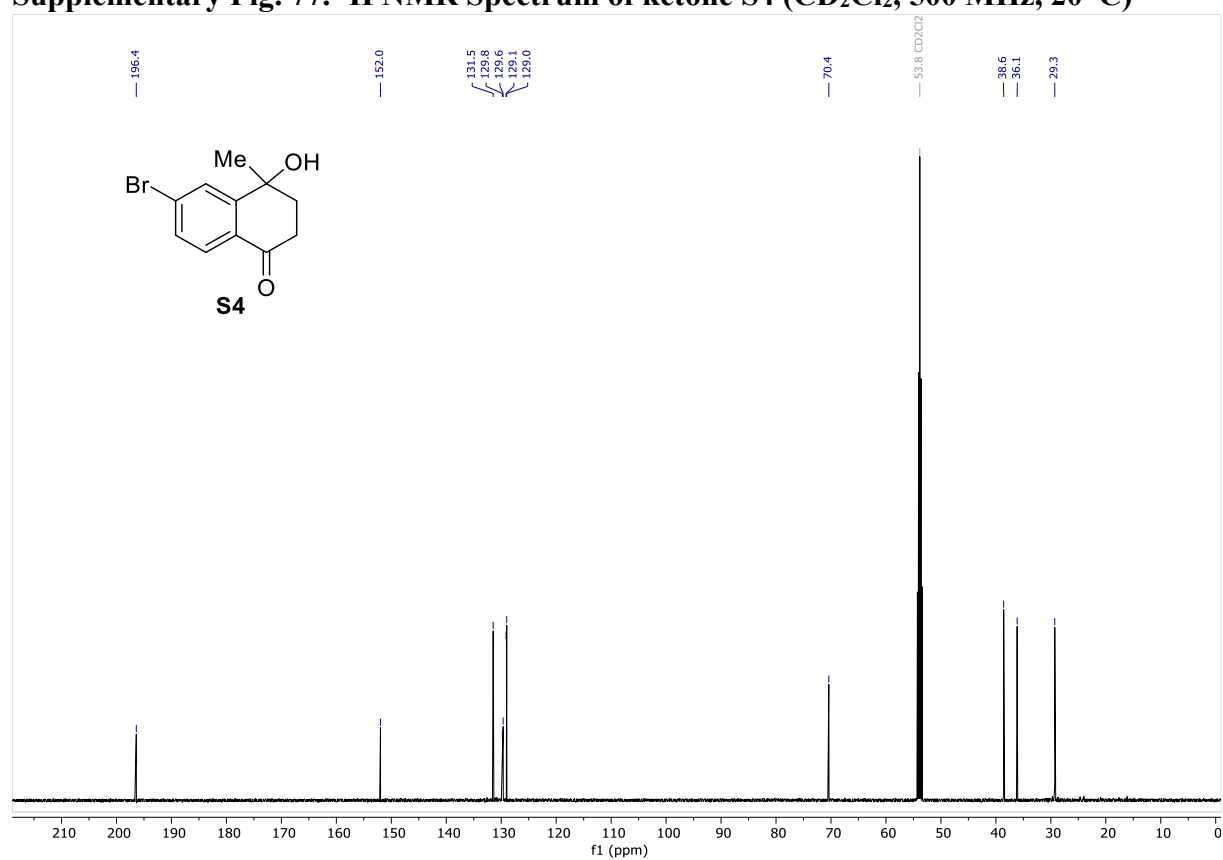

Supplementary Fig. 78. <sup>13</sup>C NMR Spectrum of ketone S4 (CD<sub>2</sub>Cl<sub>2</sub>, 126 MHz, 20 °C)

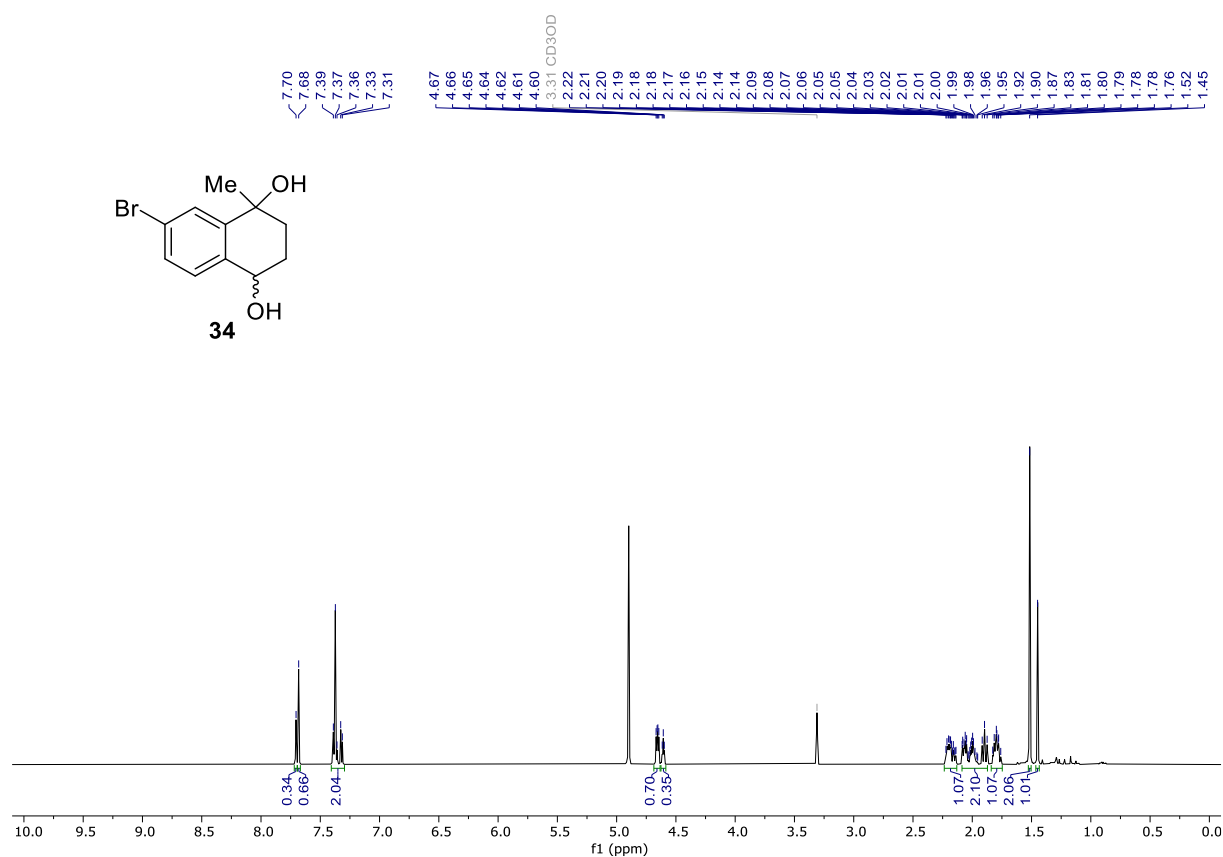

Supplementary Fig. 79.  $^1\text{H}$  NMR Spectrum of diol **34** (MeOD- $\text{d}_4$ , 600 MHz, 20  $^\circ\text{C}$ )

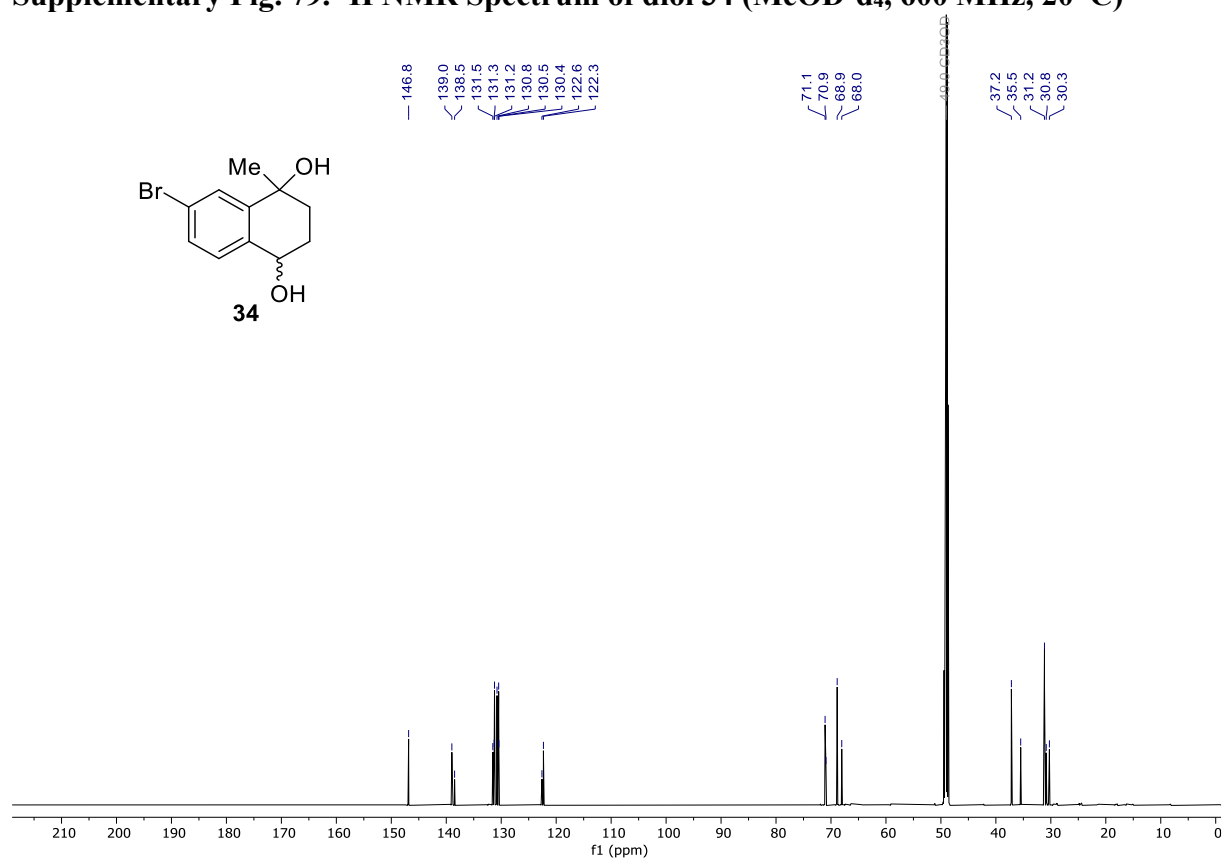

Supplementary Fig. 80.  $^{13}\text{C}$  NMR Spectrum of diol **34** (MeOD- $\text{d}_4$ , 151 MHz, 20  $^\circ\text{C}$ )

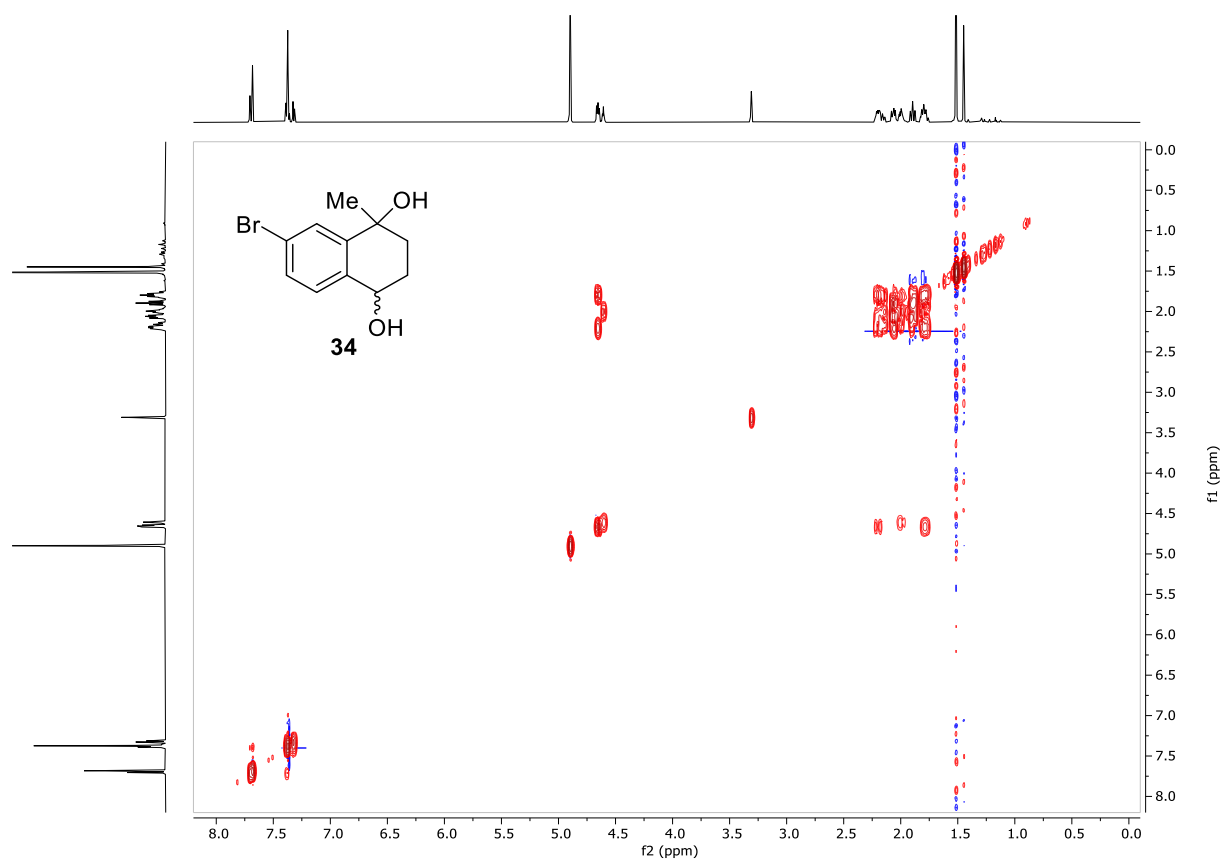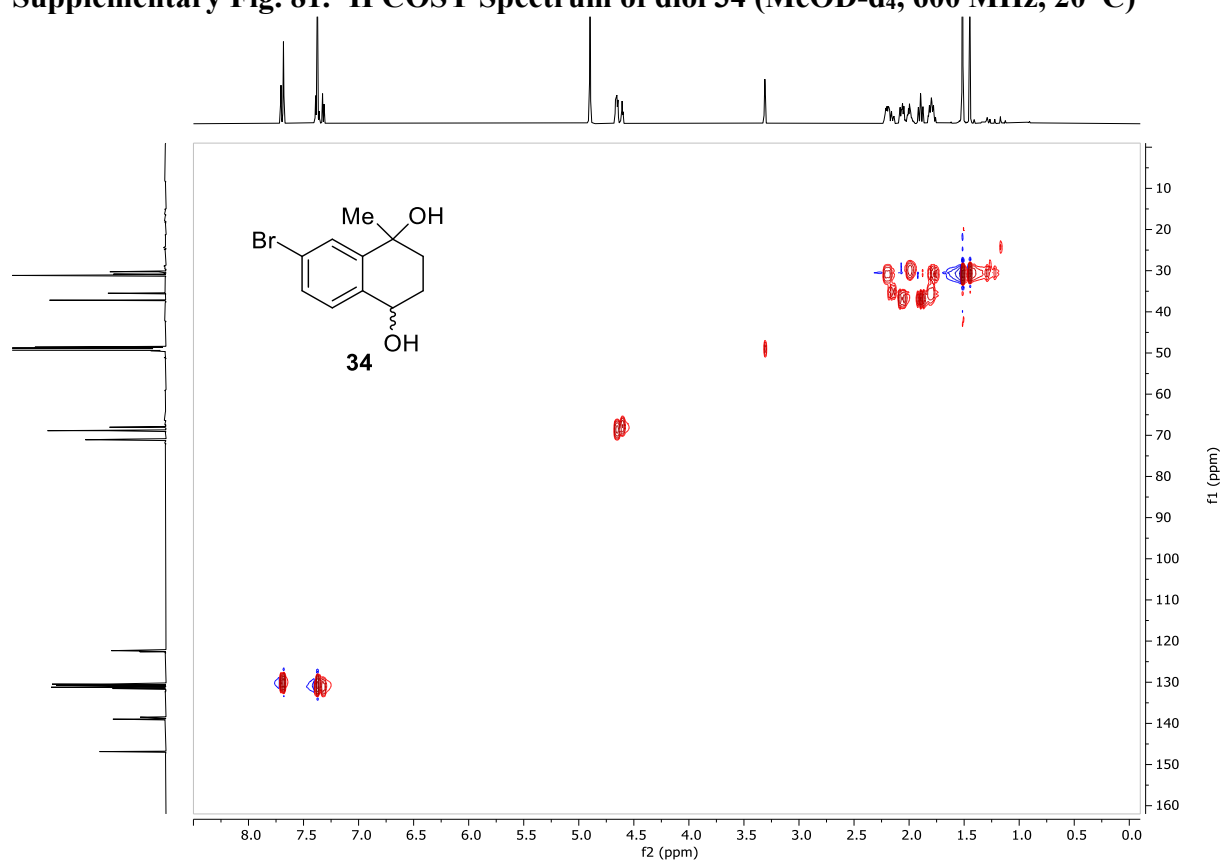

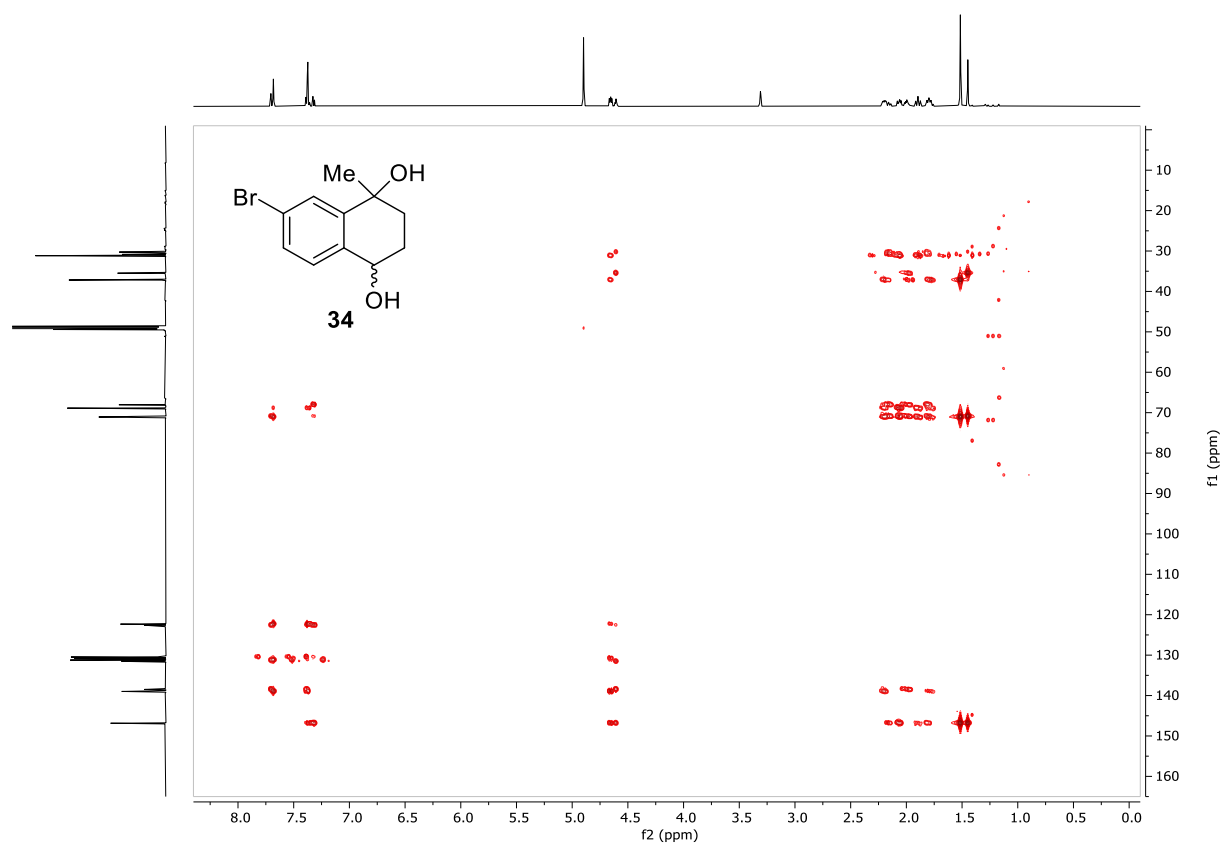

**Supplementary Fig. 83. HMBC Spectrum of diol 34 (MeOD-d<sub>4</sub>, 600 MHz, 20 °C)**

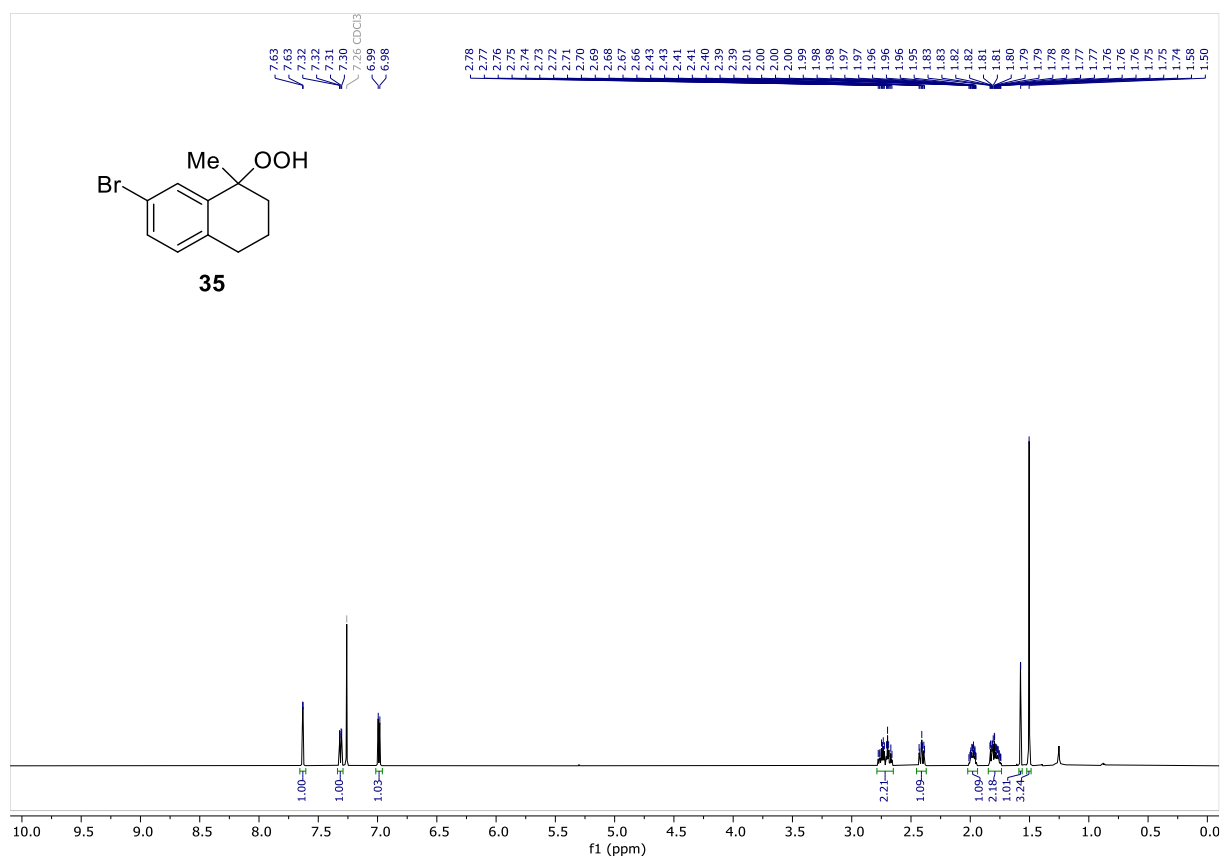

Supplementary Fig. 84.  $^1\text{H}$  NMR Spectrum of peroxide **35** ( $\text{CDCl}_3$ , 600 MHz, 20 °C)

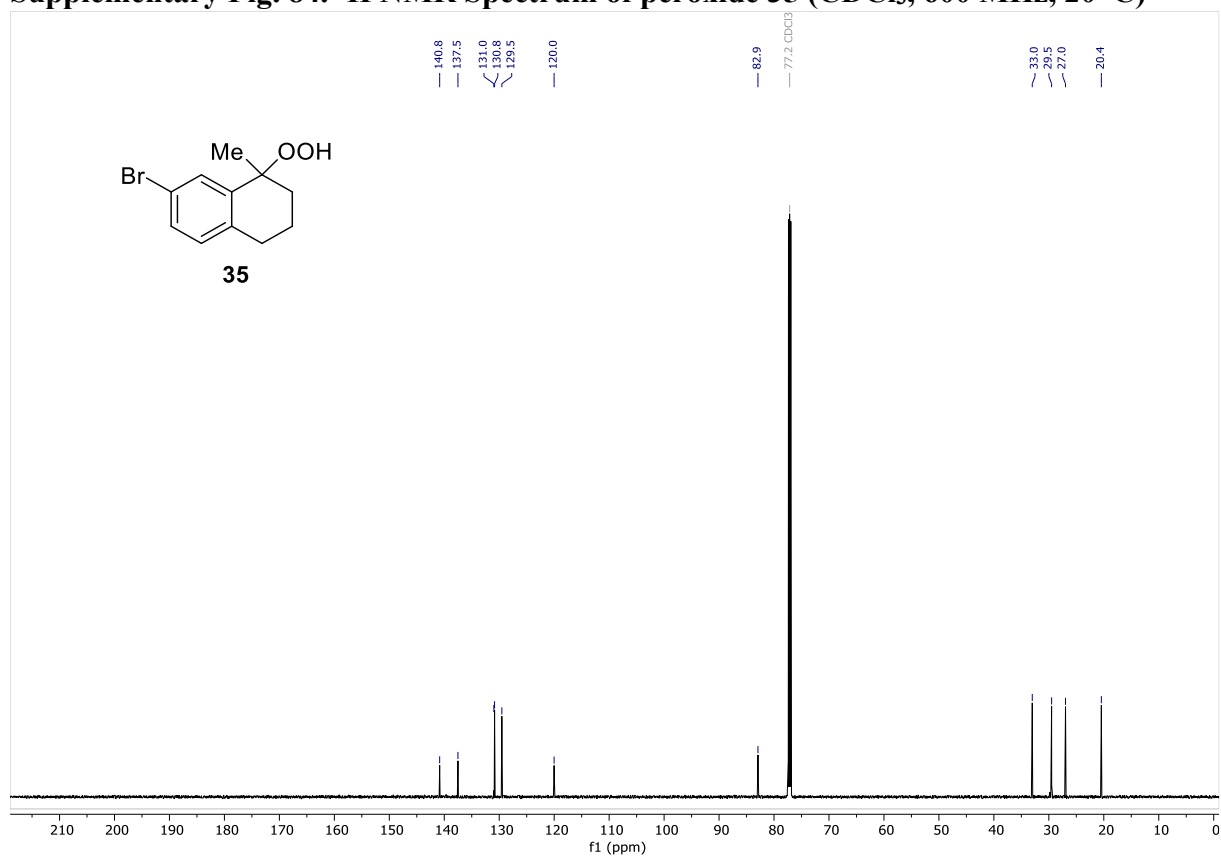

Supplementary Fig. 85.  $^{13}\text{C}$  NMR Spectrum of peroxide **35** ( $\text{CDCl}_3$ , 151 MHz, 20 °C)

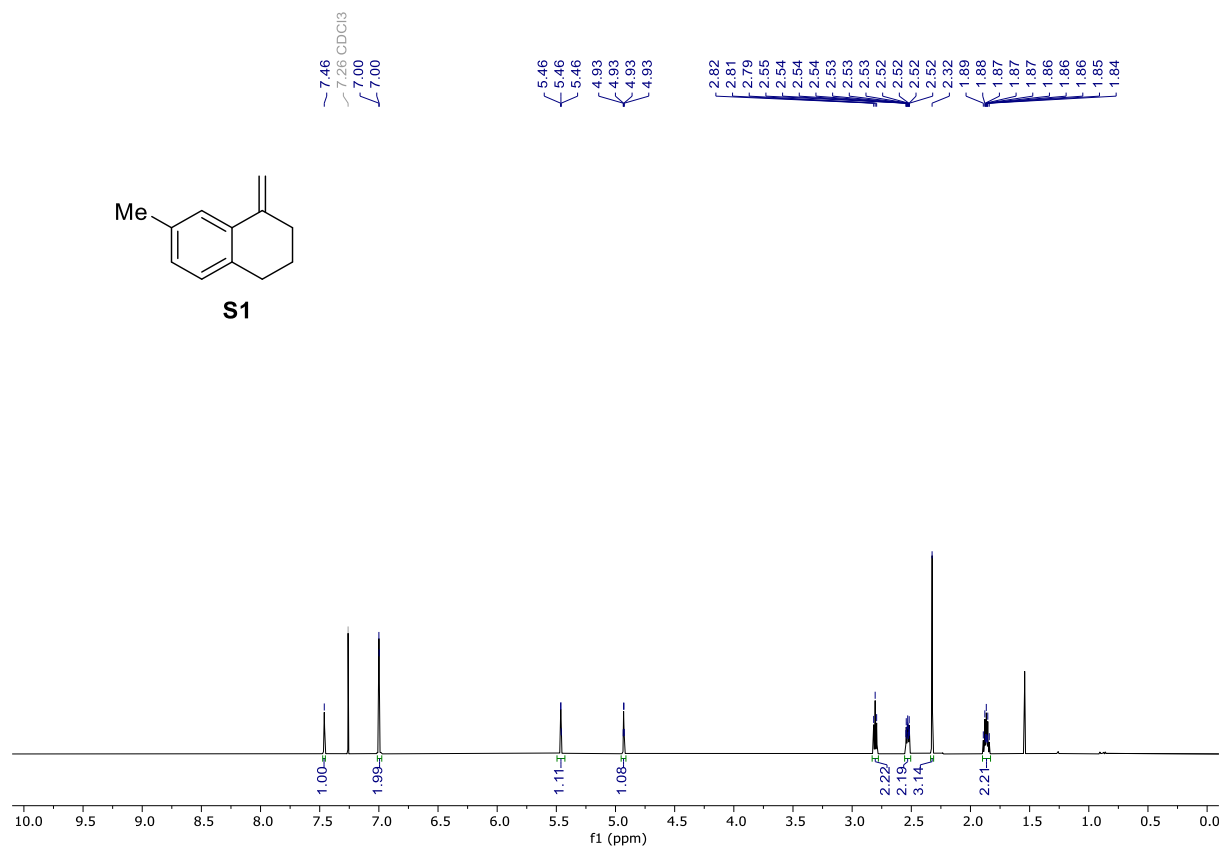

Supplementary Fig. 86. <sup>1</sup>H NMR Spectrum of alkene S1 (CDCl<sub>3</sub>, 500 MHz, 20 °C)

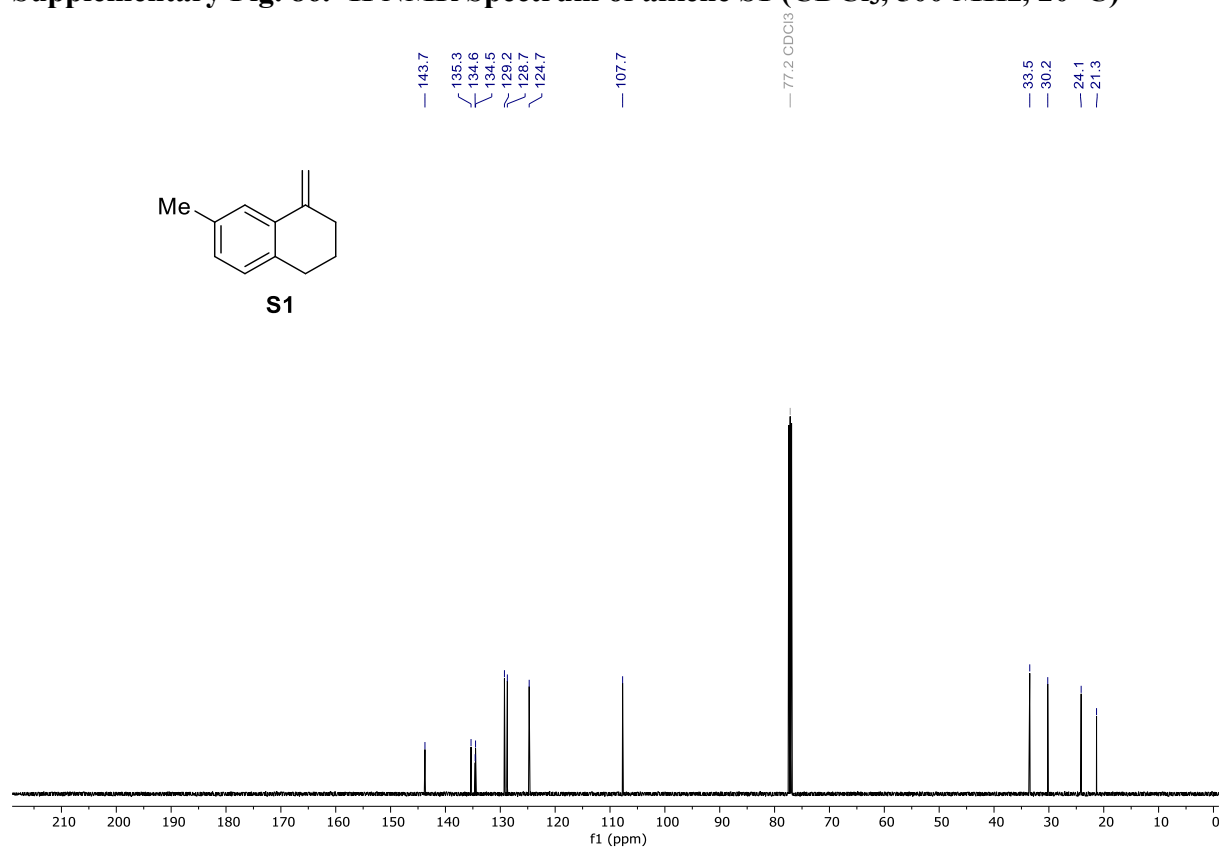

Supplementary Fig. 87. <sup>13</sup>C NMR Spectrum of alkene S1 (CDCl<sub>3</sub>, 126 MHz, 20 °C)

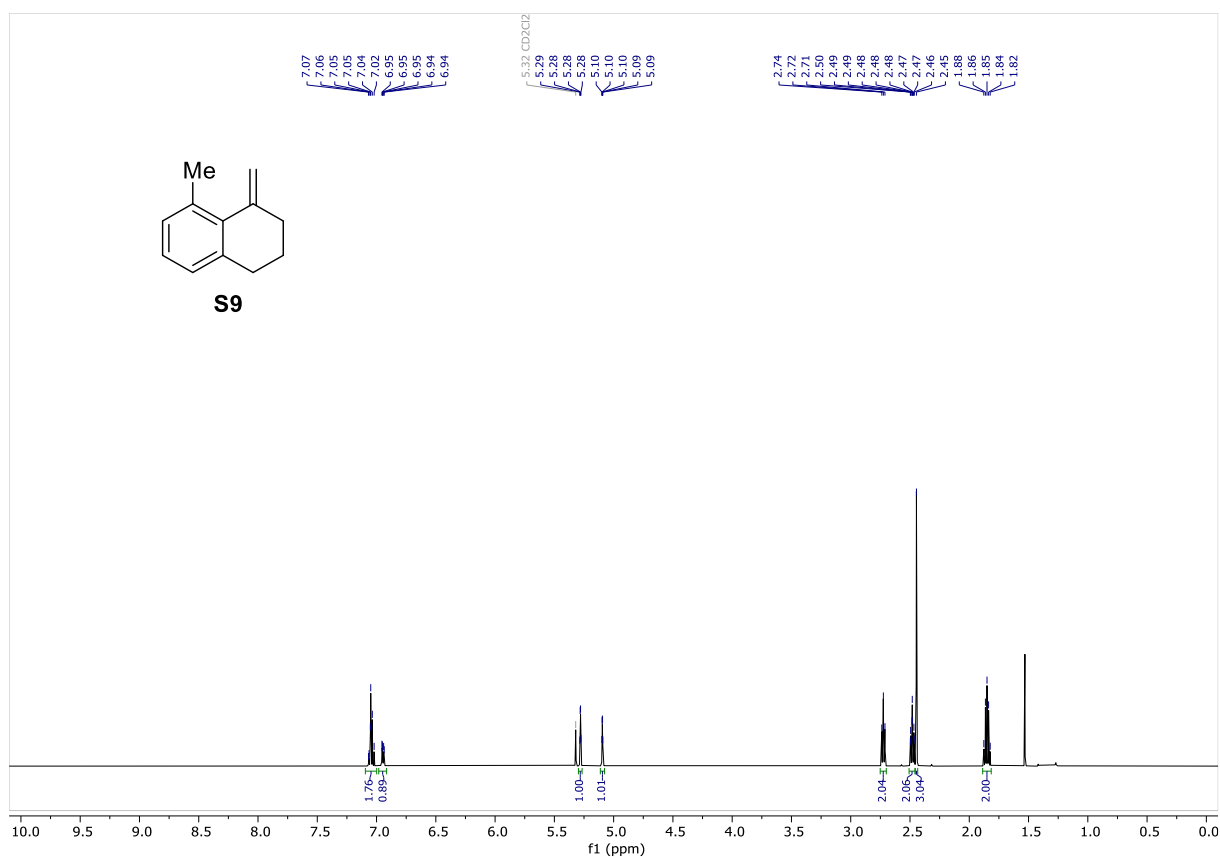

**Supplementary Fig. 88. <sup>1</sup>H NMR Spectrum of alkene S9 (CD<sub>2</sub>Cl<sub>2</sub>, 500 MHz, 20 °C)**

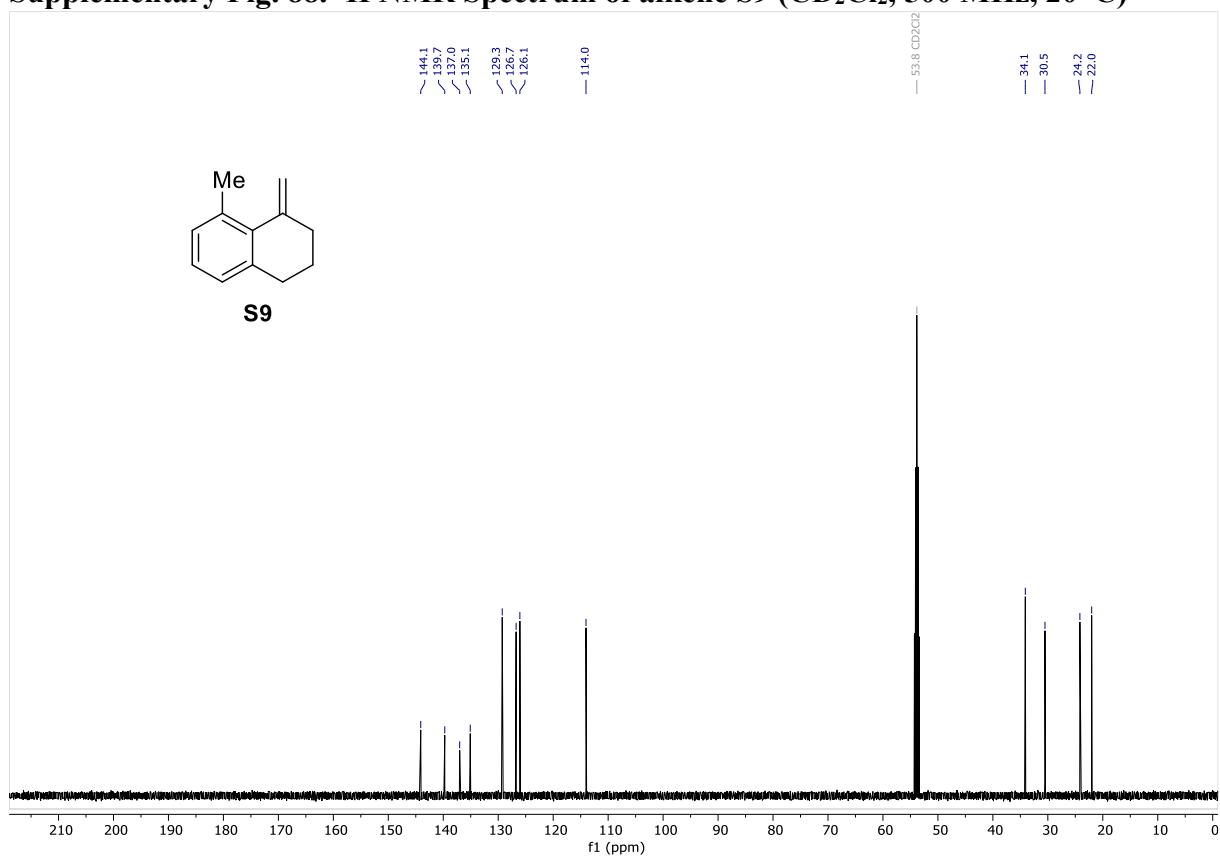

**Supplementary Fig. 89. <sup>13</sup>C NMR Spectrum of alkene S9 (CD<sub>2</sub>Cl<sub>2</sub>, 126 MHz, 20 °C)**



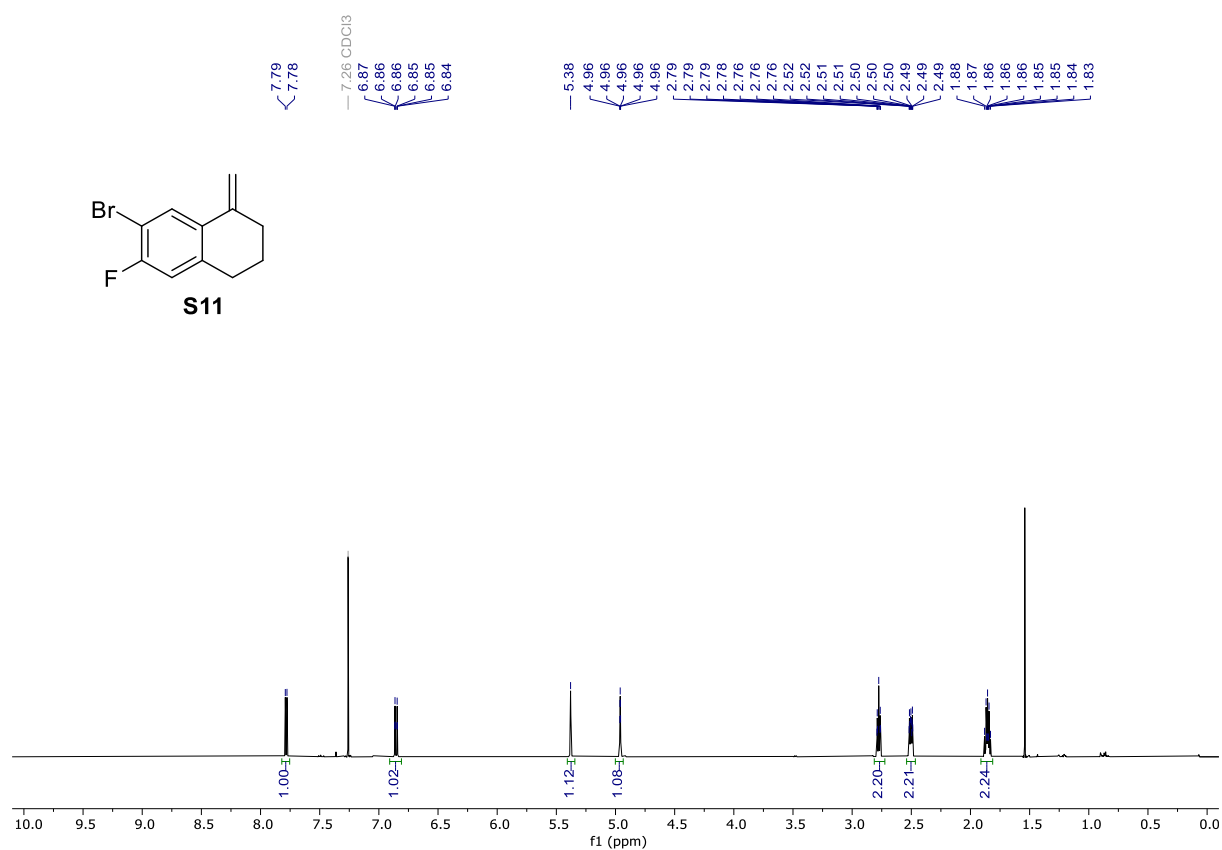

**Supplementary Fig. 90. <sup>1</sup>H NMR Spectrum of alkene S11 (CDCl<sub>3</sub>, 500 MHz, 20 °C)**

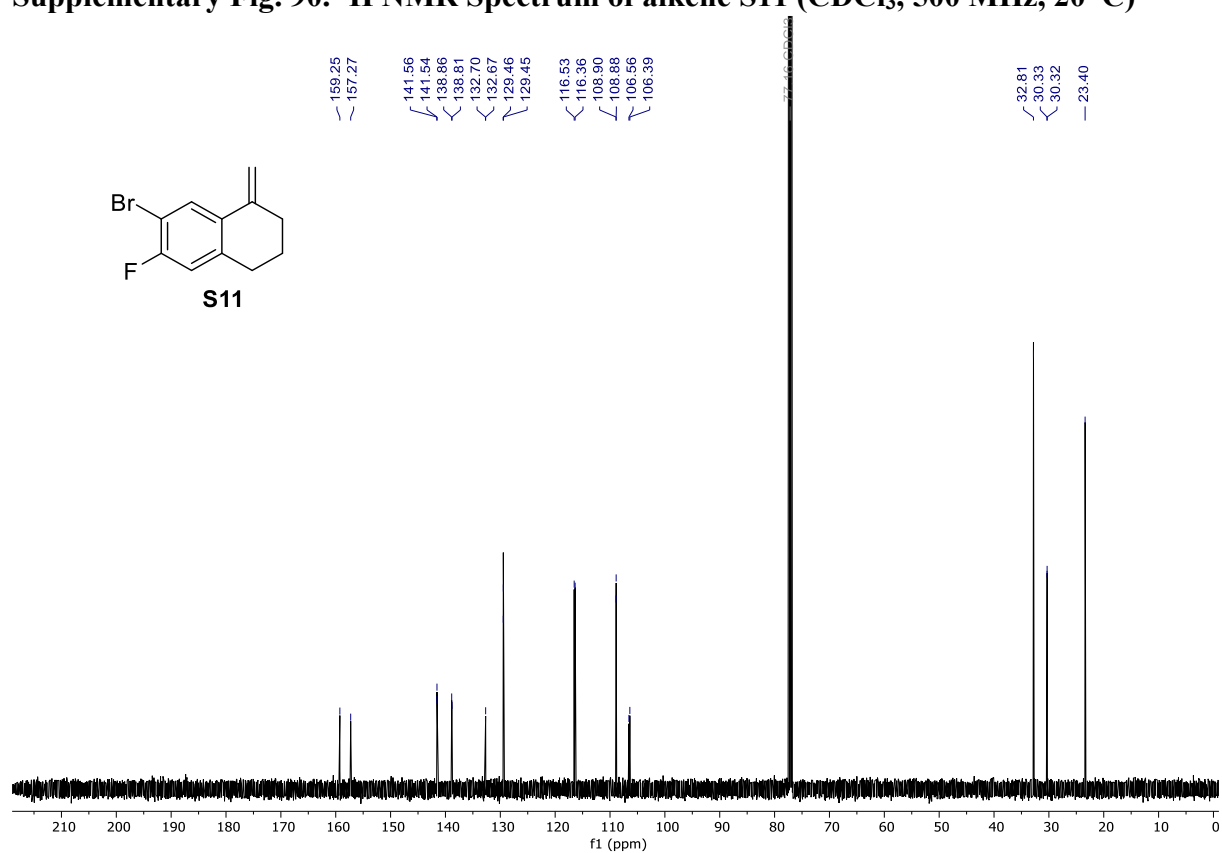

**Supplementary Fig. 91. <sup>13</sup>C NMR Spectrum of alkene S11 (CDCl<sub>3</sub>, 126 MHz, 20 °C)**

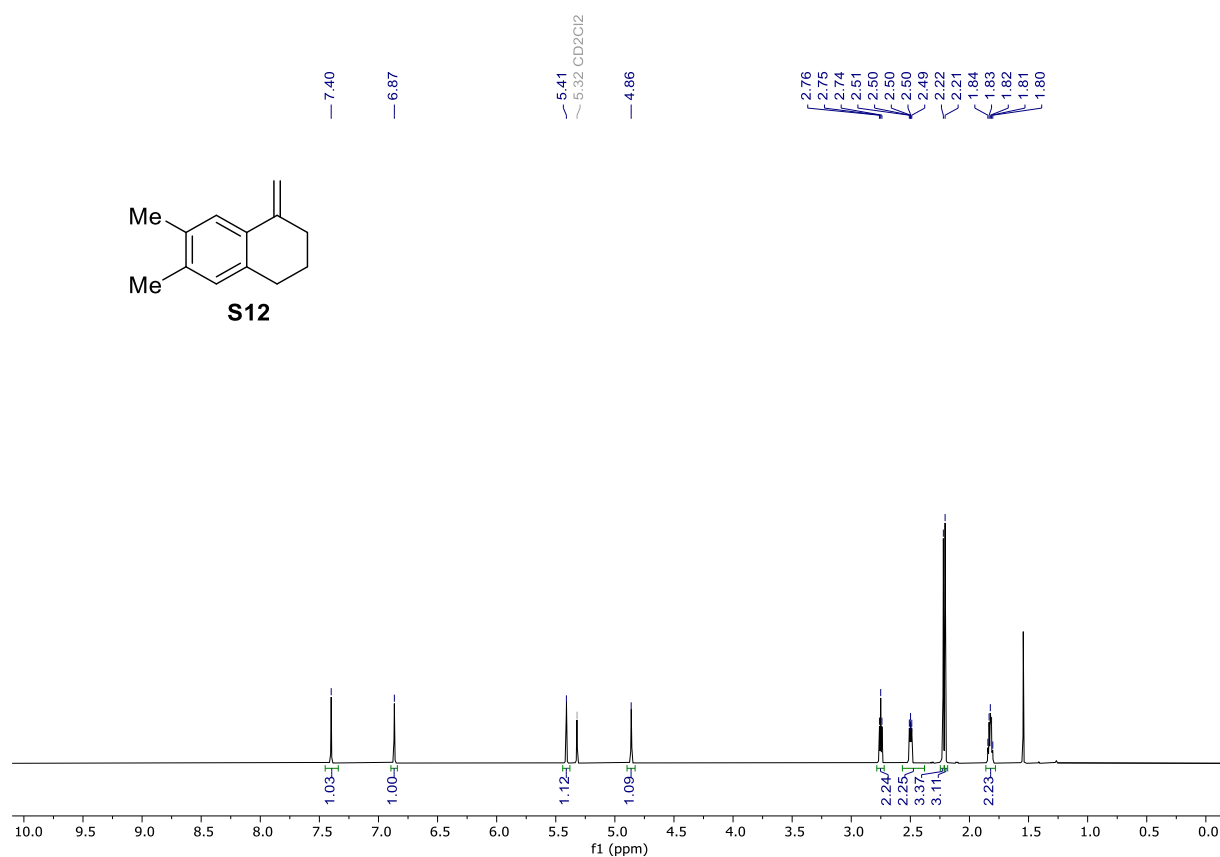

**Supplementary Fig. 92. <sup>1</sup>H NMR Spectrum of alkene S12 (CD<sub>2</sub>Cl<sub>2</sub>, 600 MHz, 20 °C)**

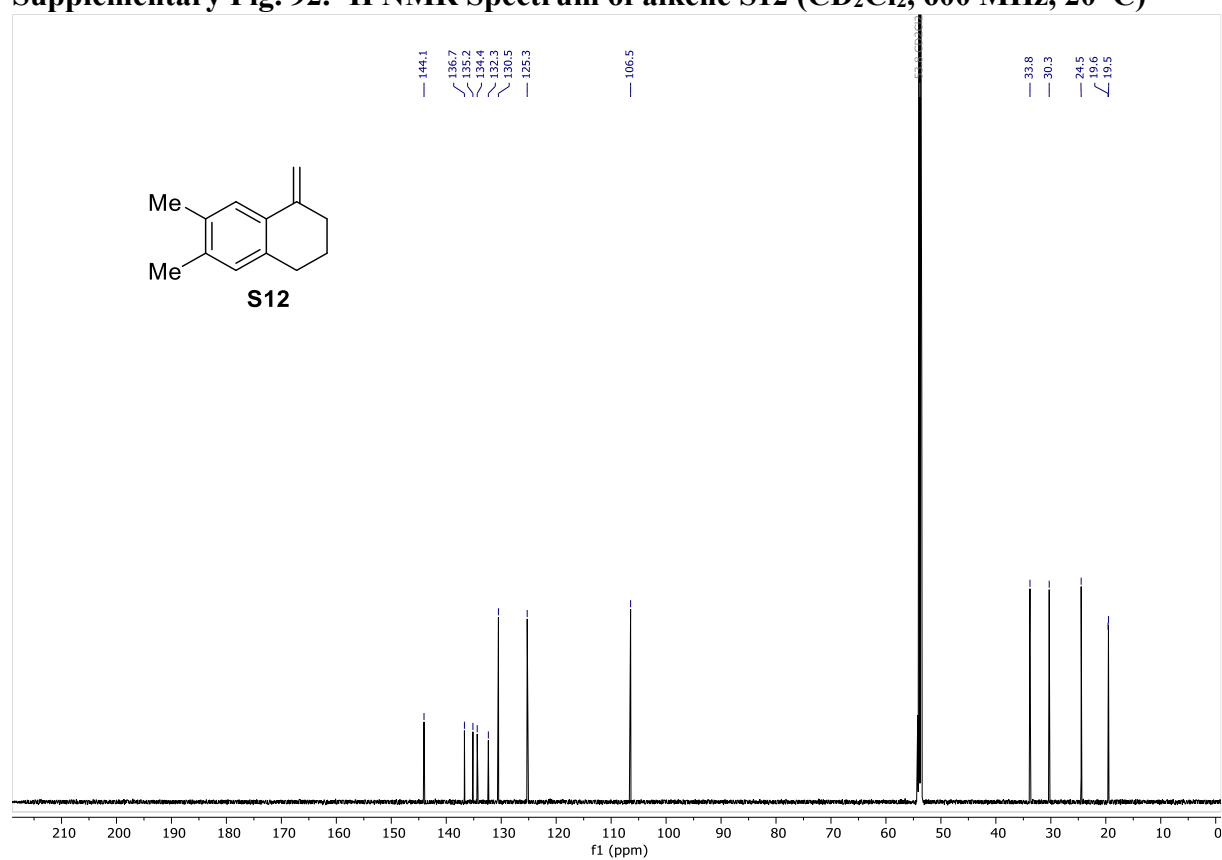

**Supplementary Fig. 93. <sup>13</sup>C NMR Spectrum of alkene S12 (CD<sub>2</sub>Cl<sub>2</sub>, 151 MHz, 20 °C)**

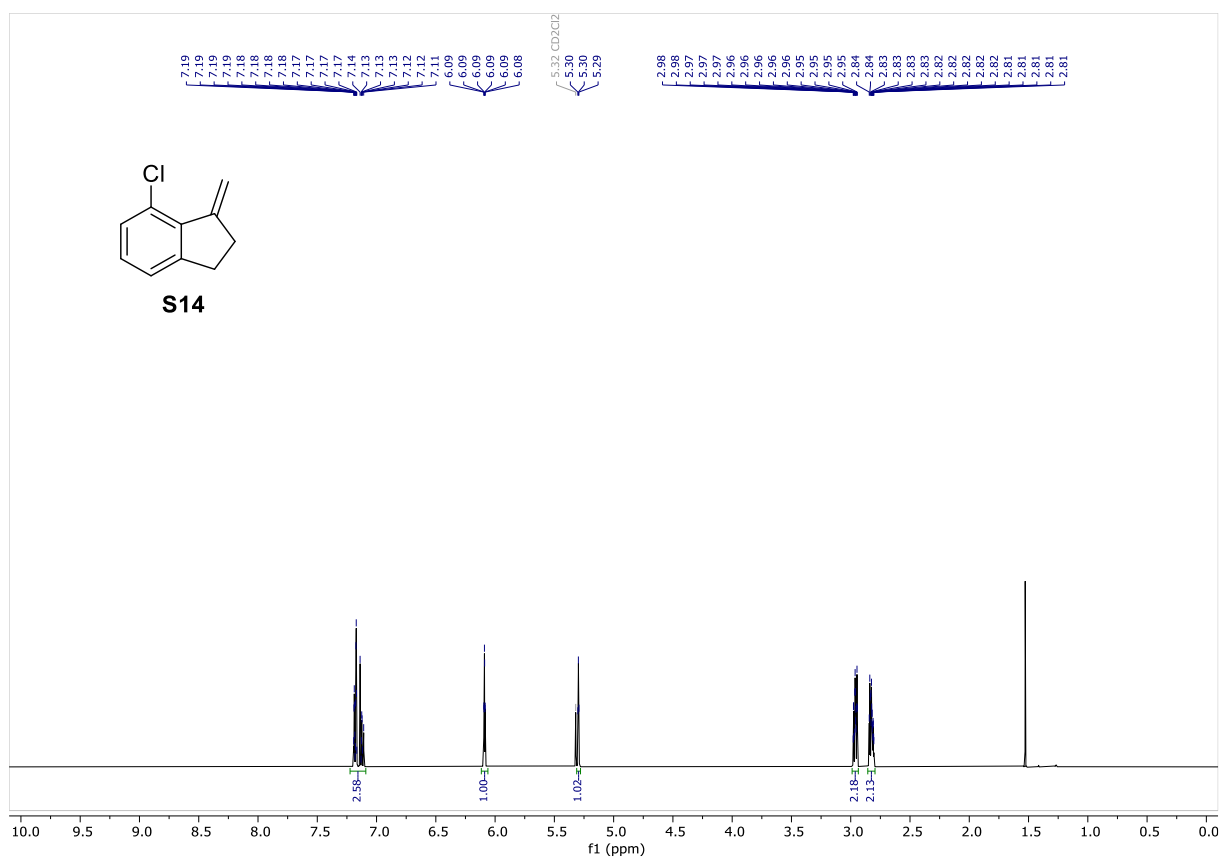

Supplementary Fig. 94. <sup>1</sup>H NMR Spectrum of alkene S14 (CD<sub>2</sub>Cl<sub>2</sub>, 500 MHz, 20 °C)

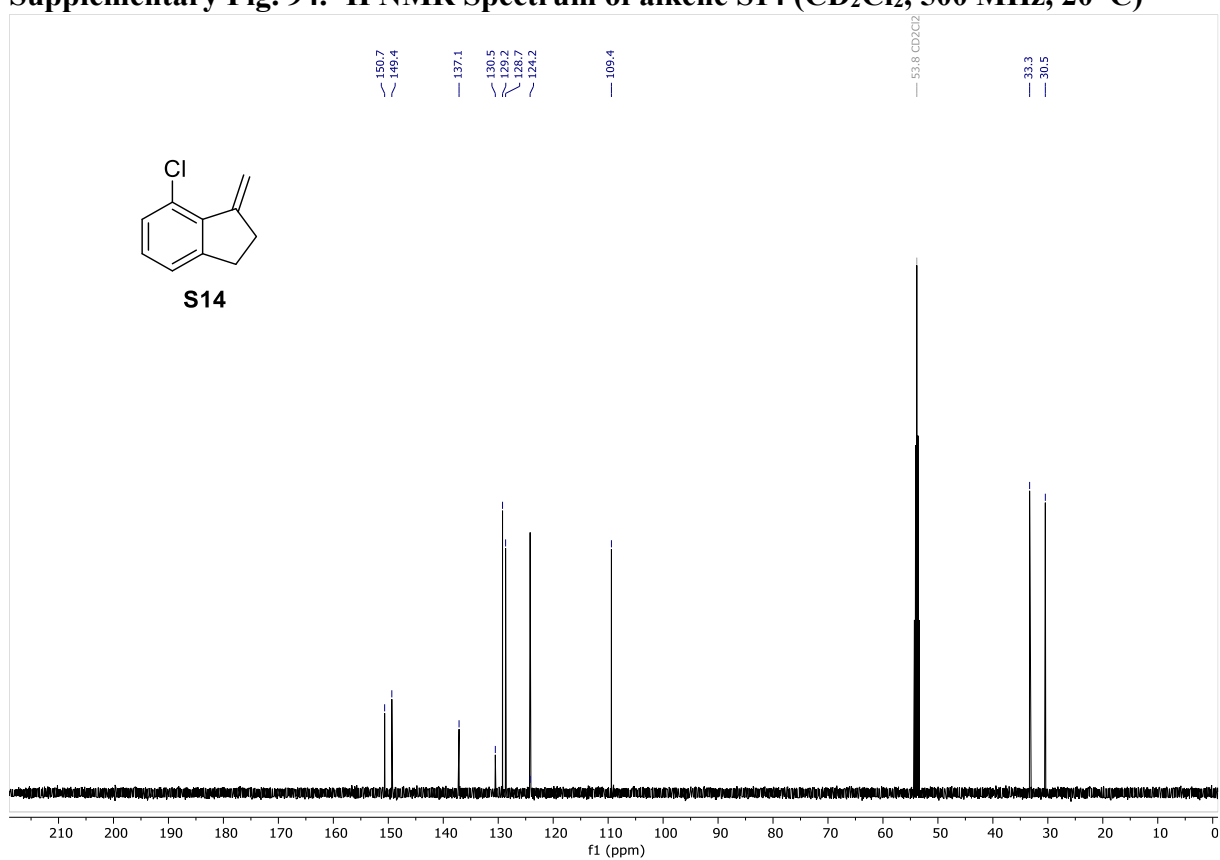

Supplementary Fig. 95. <sup>13</sup>C NMR Spectrum of alkene S14 (CD<sub>2</sub>Cl<sub>2</sub>, 126 MHz, 20 °C)

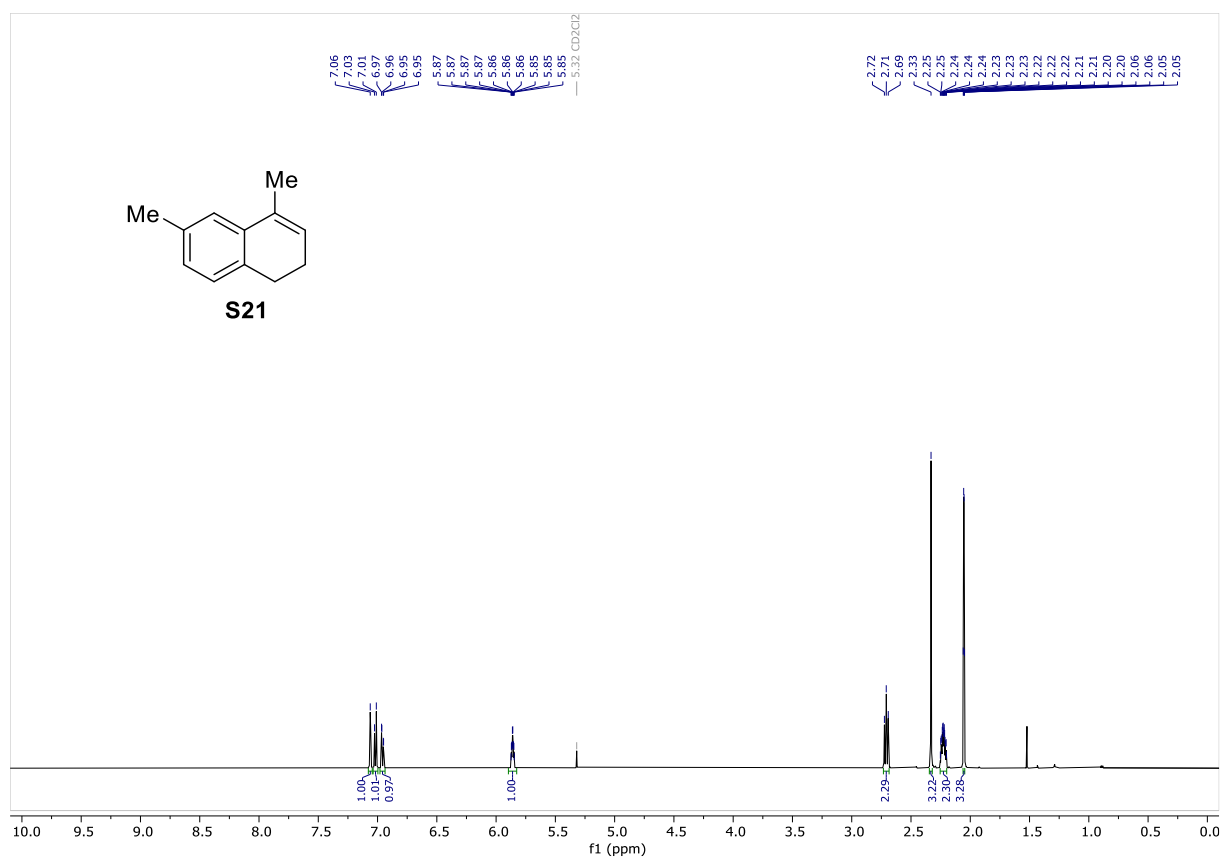

Supplementary Fig. 96.  $^1\text{H}$  NMR Spectrum of alkene S21 (CD<sub>2</sub>Cl<sub>2</sub>, 500 MHz, 20 °C)

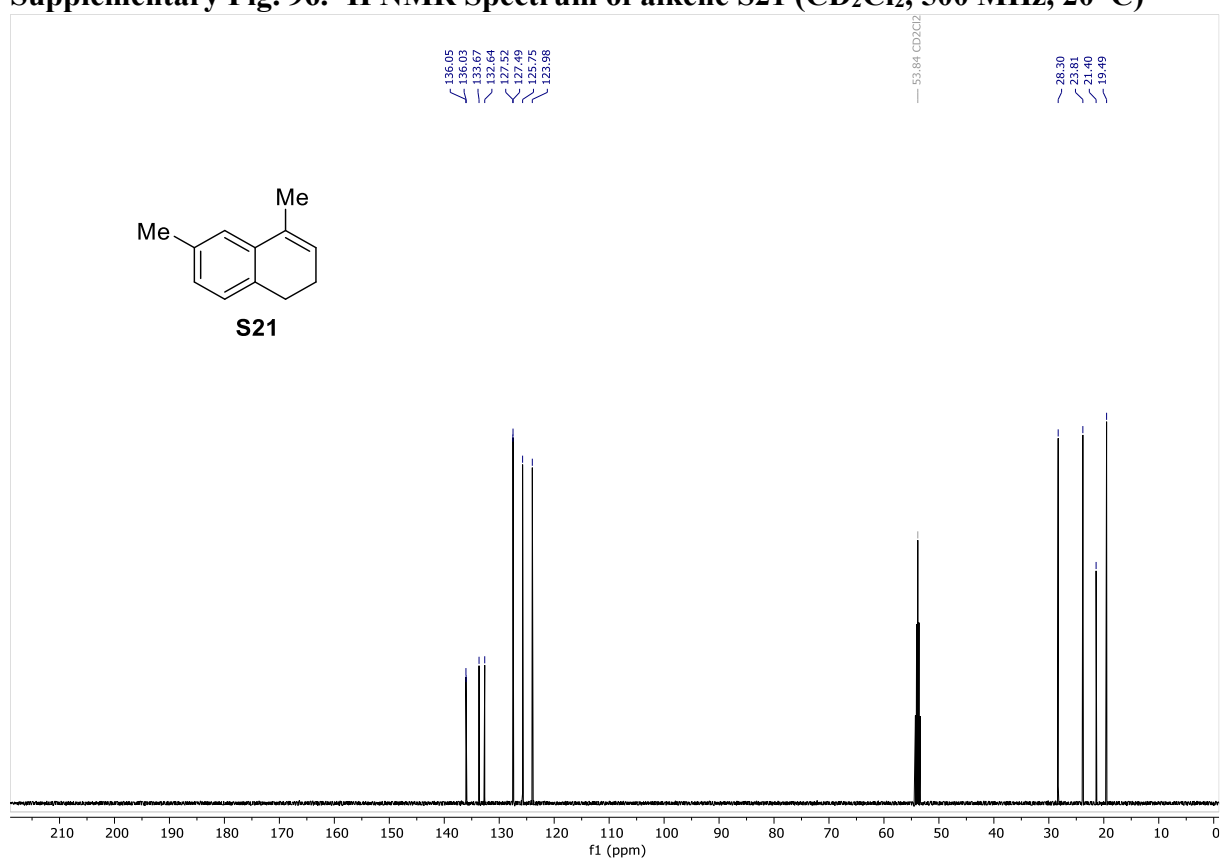

Supplementary Fig. 97.  $^{13}\text{C}$  NMR Spectrum of alkene S21 (CD<sub>2</sub>Cl<sub>2</sub>, 126 MHz, 20 °C)

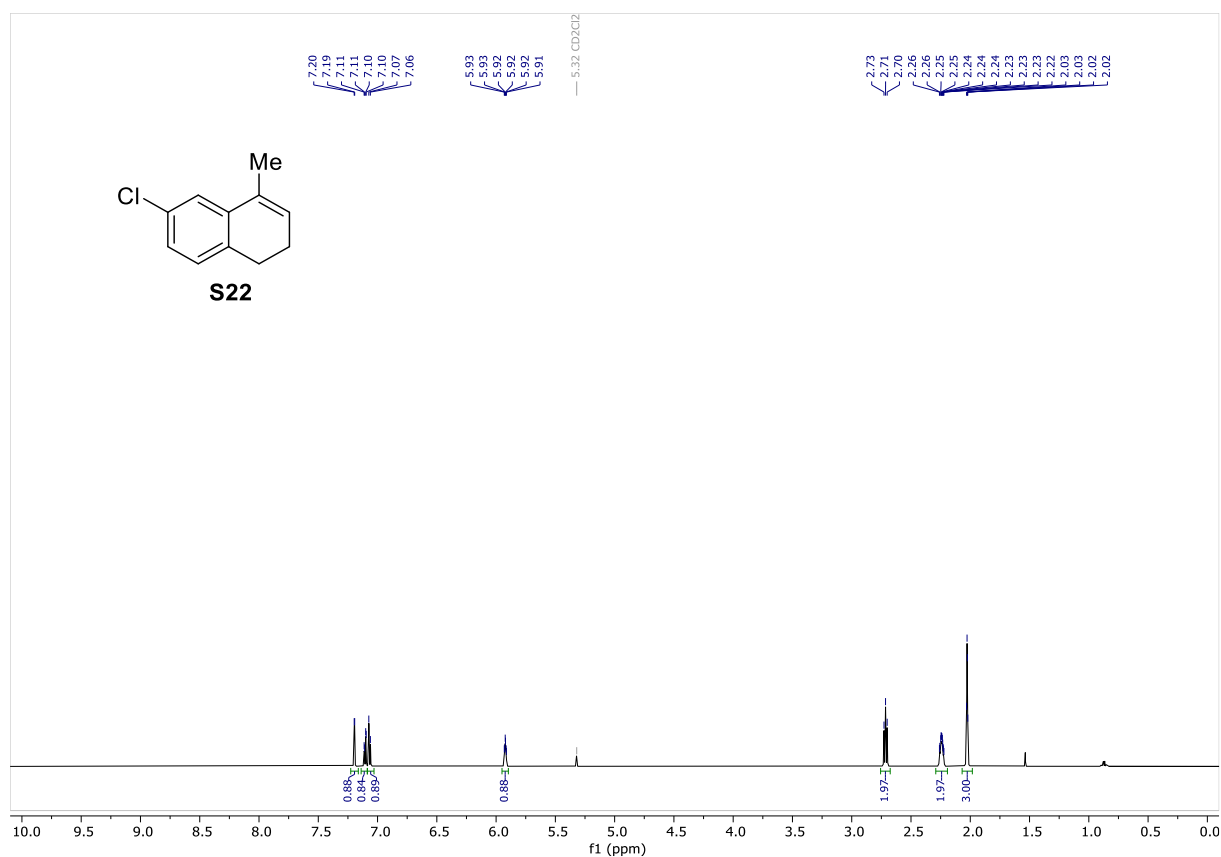

**Supplementary Fig. 98. <sup>1</sup>H NMR Spectrum of alkene S22 (CD<sub>2</sub>Cl<sub>2</sub>, 600 MHz, 20 °C)**

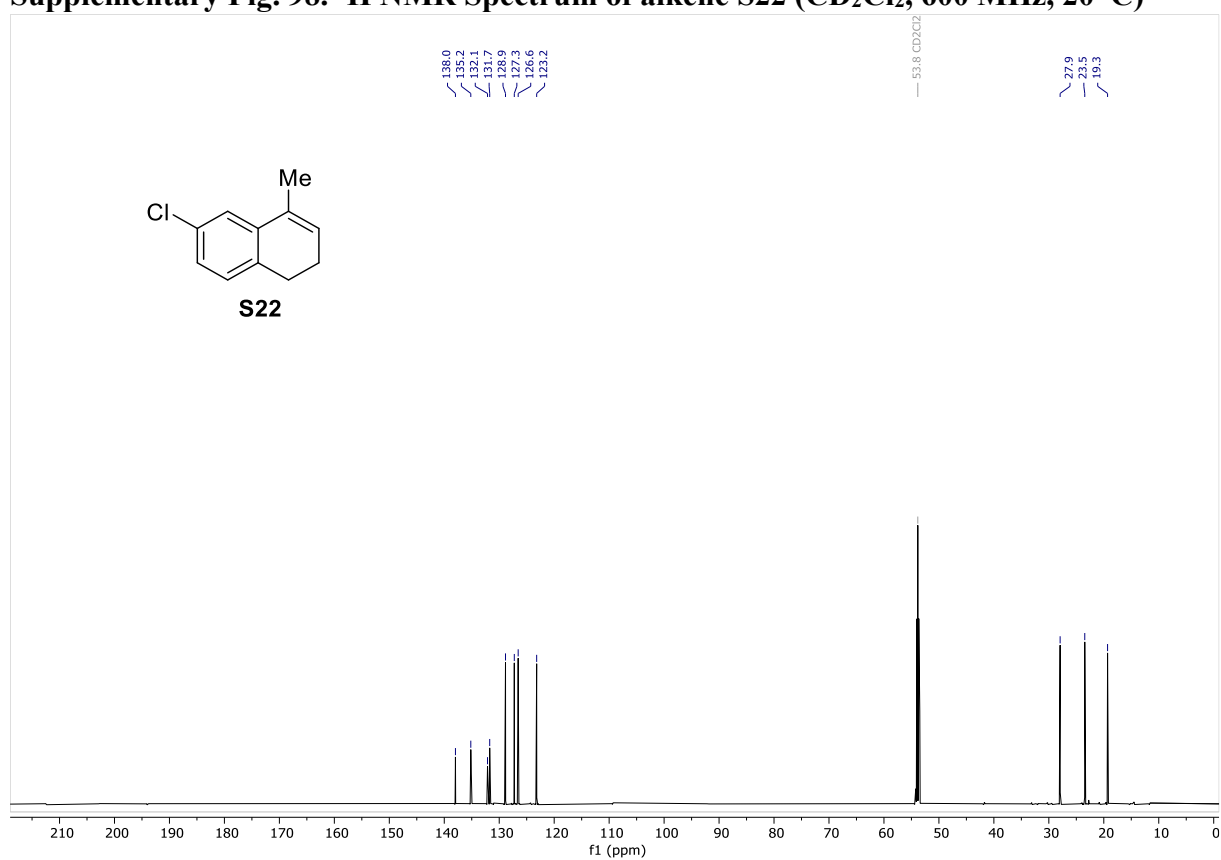

**Supplementary Fig. 99. <sup>13</sup>C NMR Spectrum of alkene S22 (CD<sub>2</sub>Cl<sub>2</sub>, 151 MHz, 20 °C)**

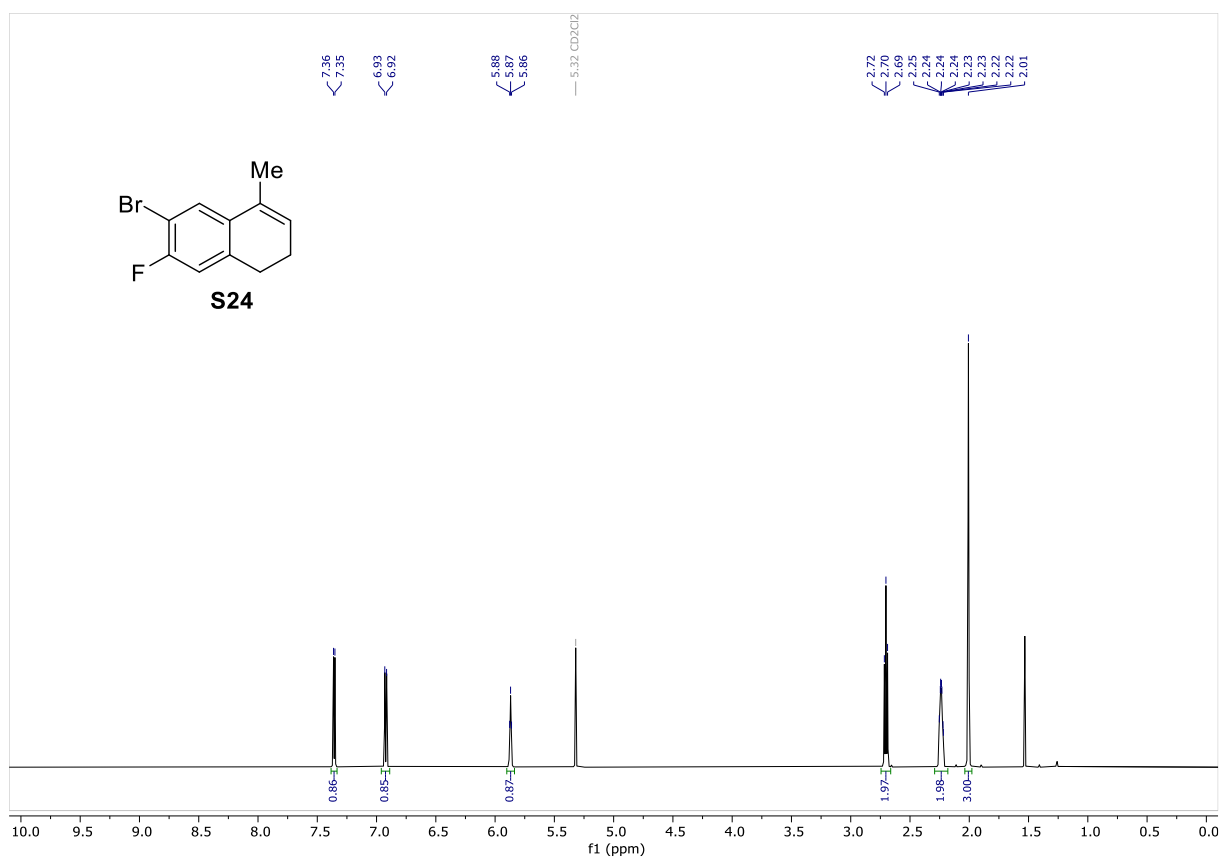

**Supplementary Fig. 100. <sup>1</sup>H NMR Spectrum of alkene S24 (CD<sub>2</sub>Cl<sub>2</sub>, 600 MHz, 20 °C)**

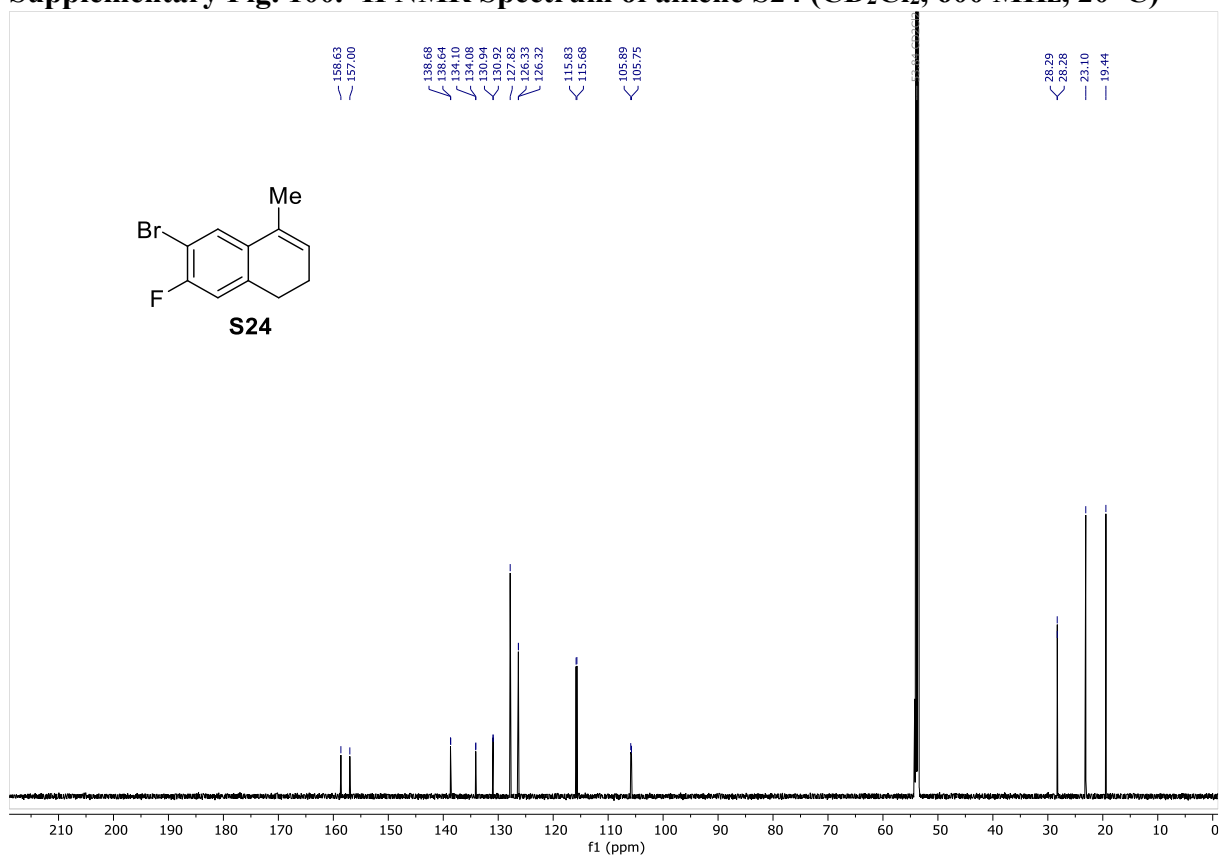

**Supplementary Fig. 101. <sup>13</sup>C NMR Spectrum of alkene S24 (CD<sub>2</sub>Cl<sub>2</sub>, 151 MHz, 20 °C)**

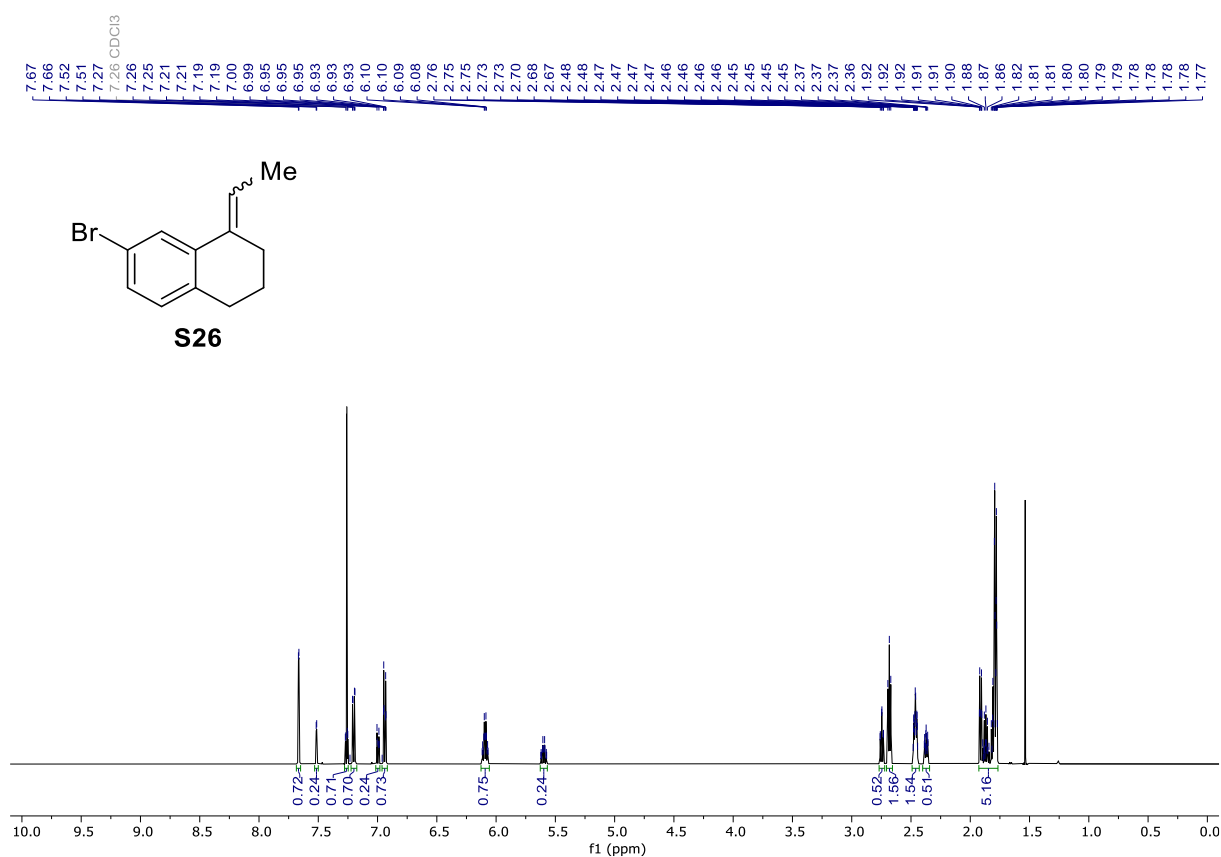

Supplementary Fig. 102. <sup>1</sup>H NMR Spectrum of alkene S26 (CDCl<sub>3</sub>, 500 MHz, 20 °C)

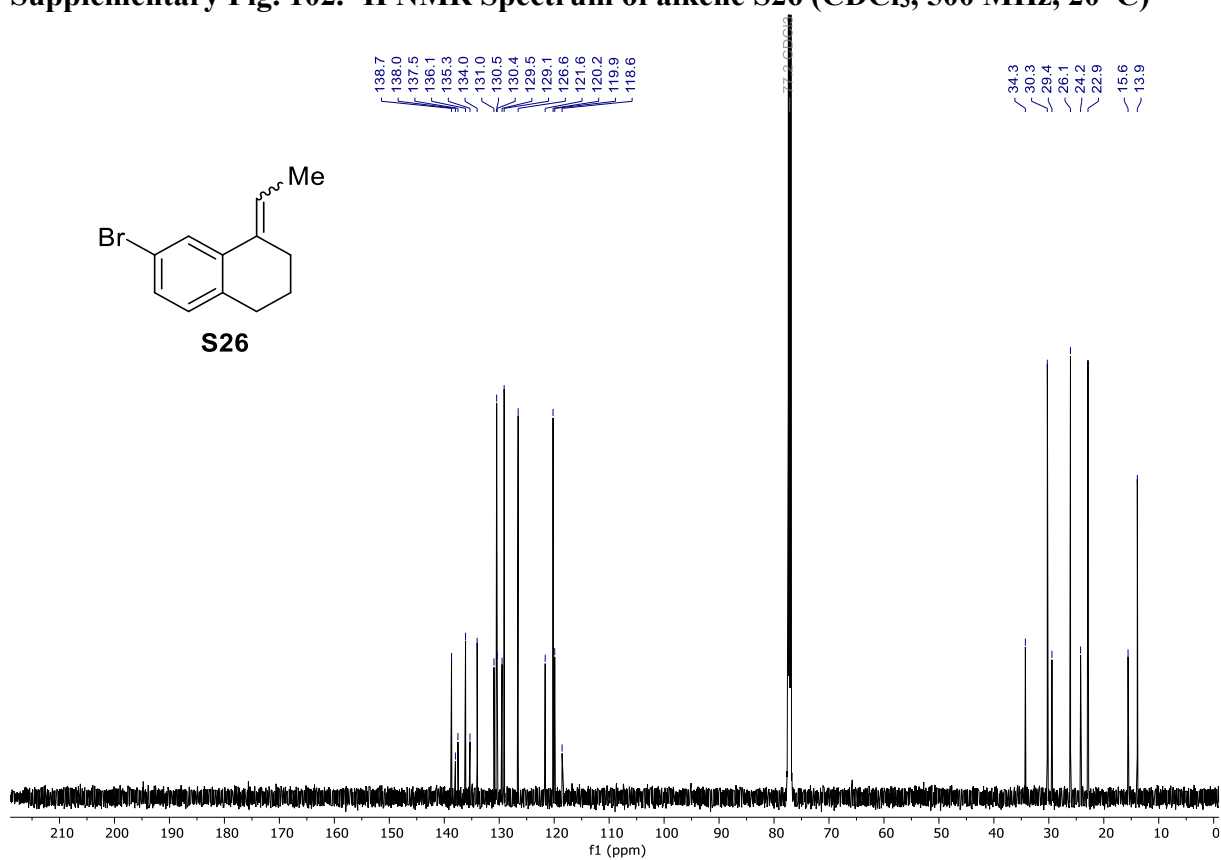

Supplementary Fig. 103. <sup>13</sup>C NMR Spectrum of alkene S26 (CDCl<sub>3</sub>, 151 MHz, 20 °C)

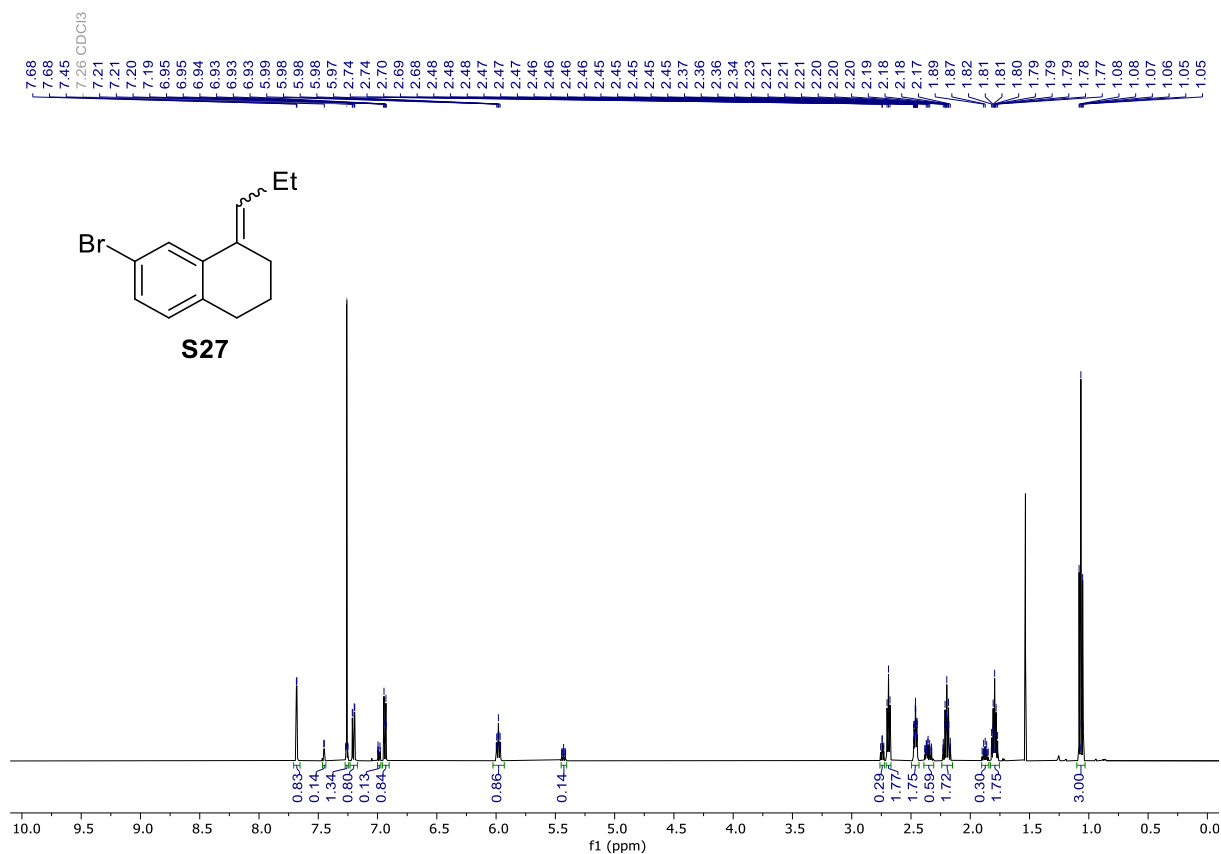

**Supplementary Fig. 104. <sup>1</sup>H NMR Spectrum of alkene S27 (CDCl<sub>3</sub>, 500 MHz, 20 °C)**

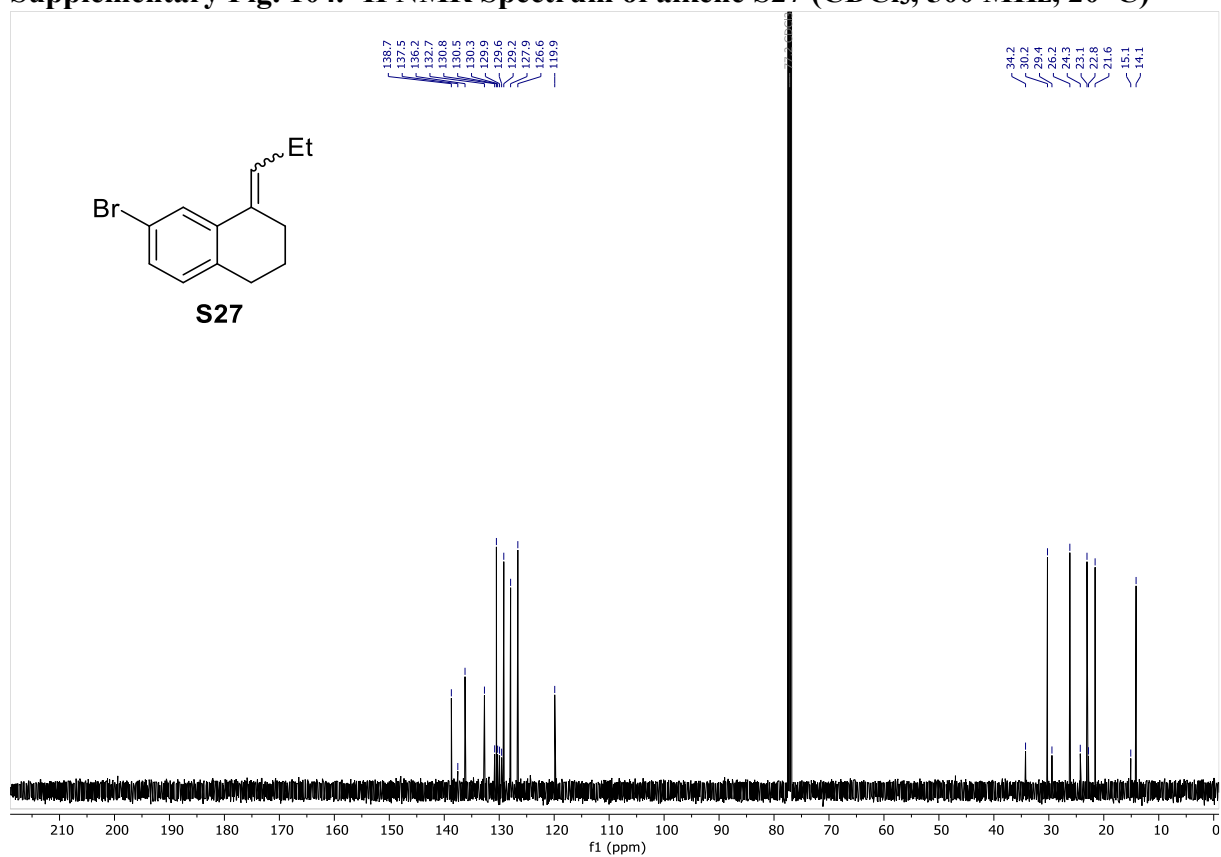

**Supplementary Fig. 105. <sup>13</sup>C NMR Spectrum of alkene S27 (CDCl<sub>3</sub>, 126 MHz, 20 °C)**



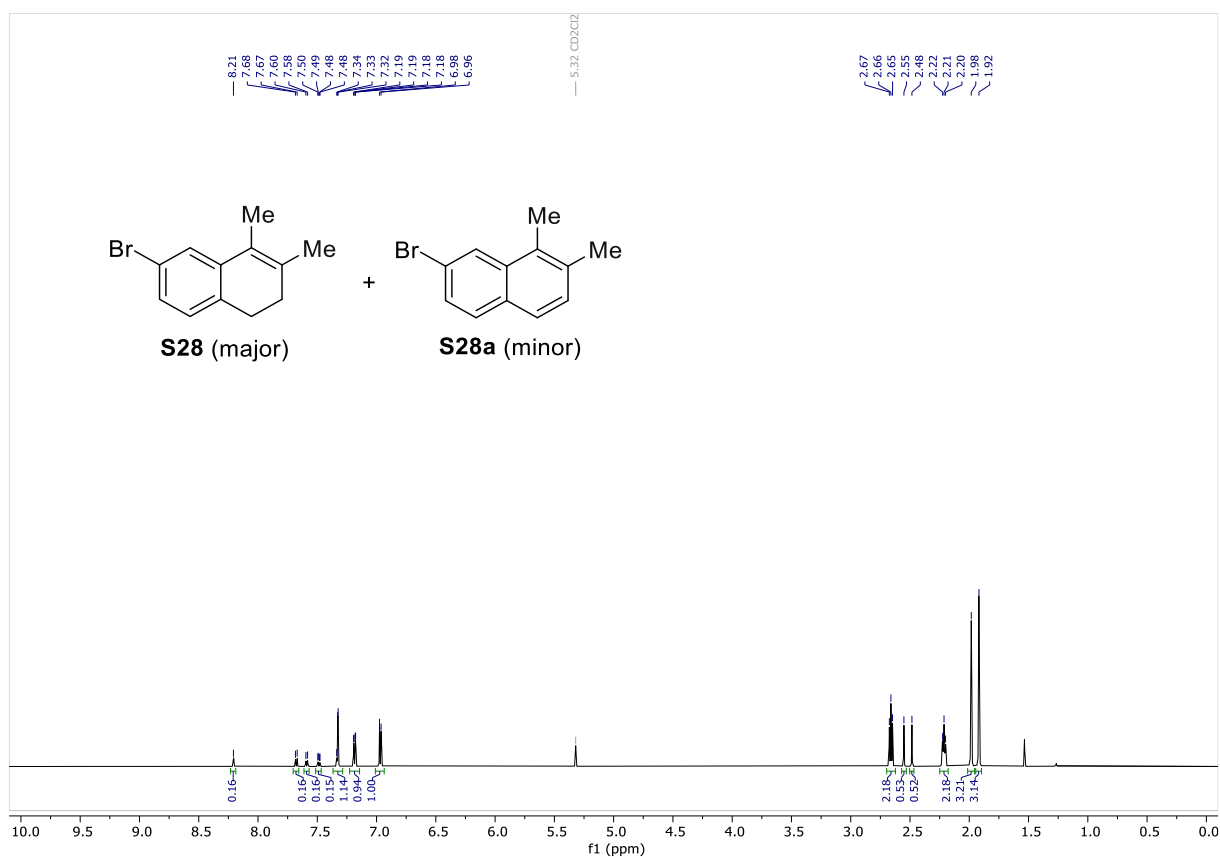

**Supplementary Fig. 106. <sup>1</sup>H NMR Spectrum of alkene S28 and byproduct S28a (CD<sub>2</sub>Cl<sub>2</sub>, 600 MHz, 20 °C)**

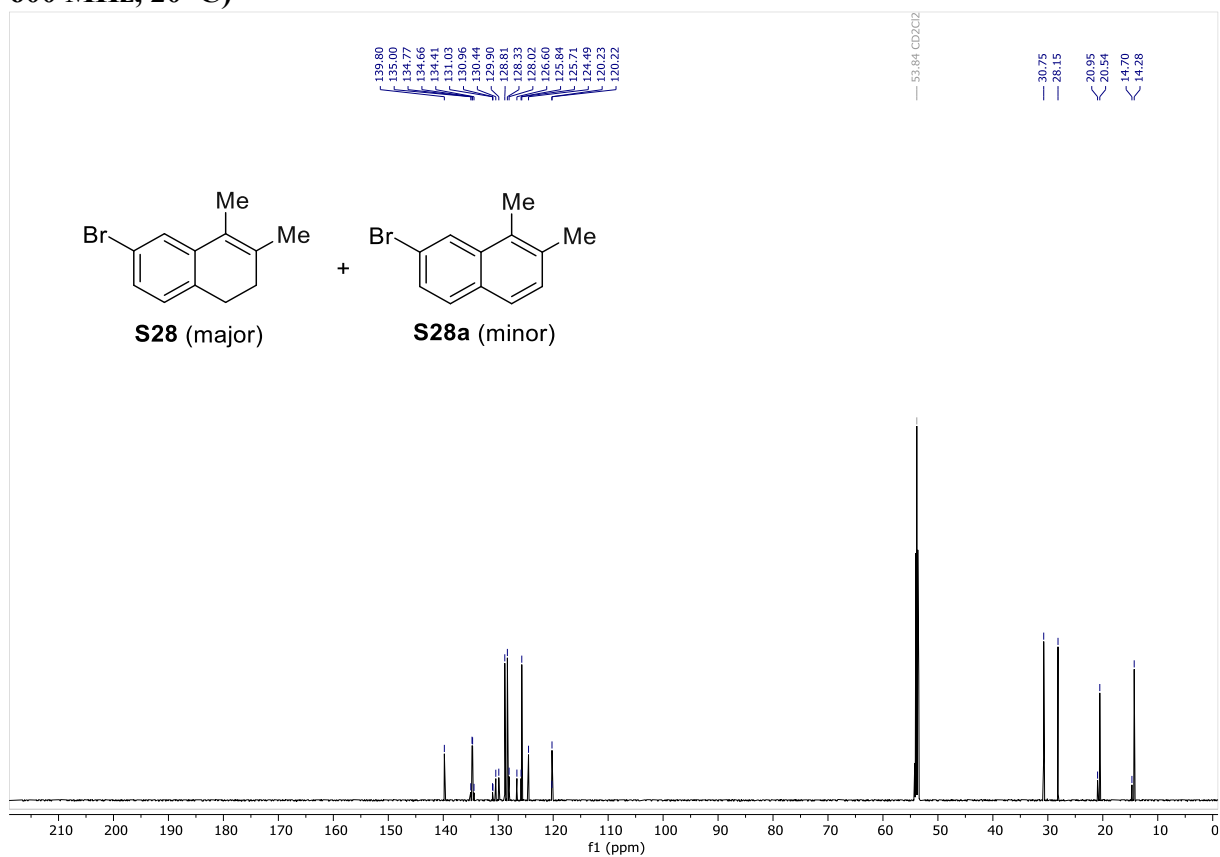

**Supplementary Fig. 107. <sup>13</sup>C NMR Spectrum of alkene S28 and byproduct S28a (CD<sub>2</sub>Cl<sub>2</sub>, 151 MHz, 20 °C)**

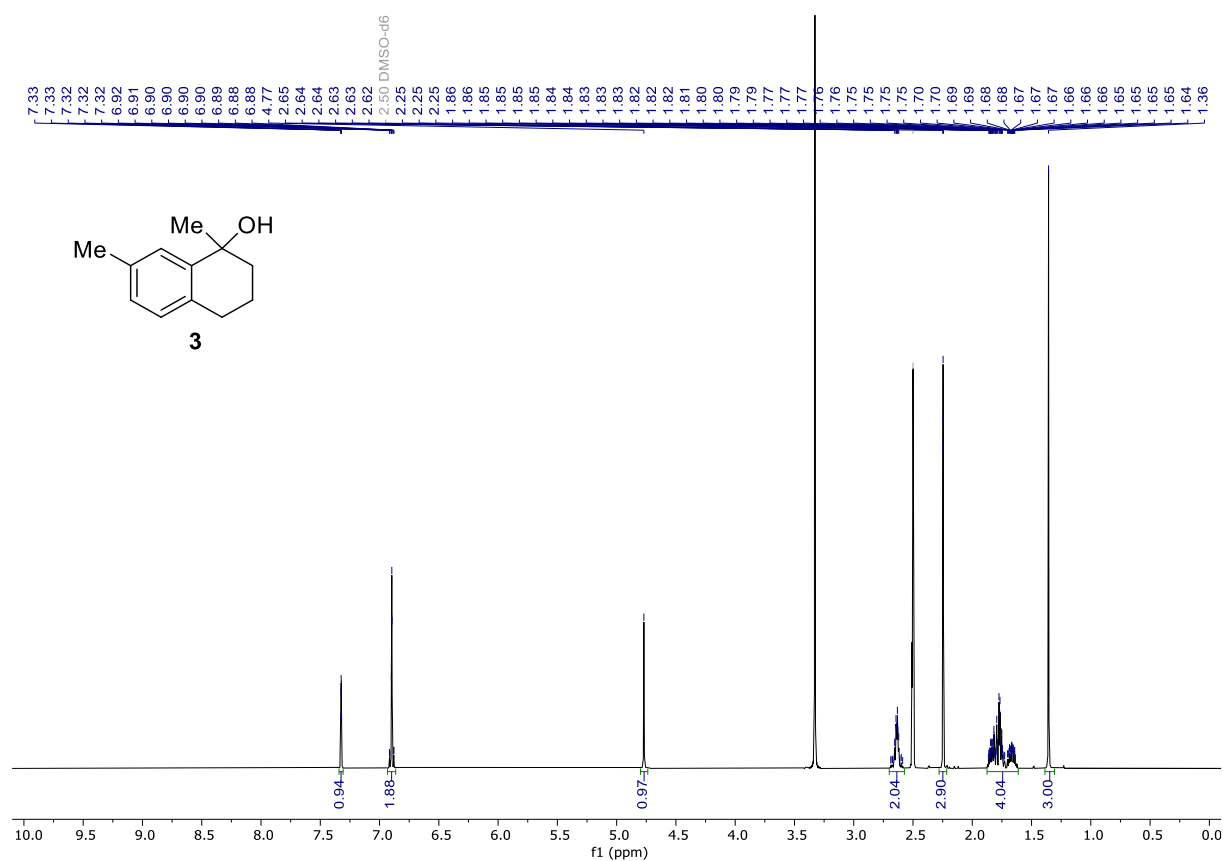

Supplementary Fig. 108. <sup>1</sup>H NMR Spectrum of tetralol 3 (DMSO-d<sub>6</sub>, 500 MHz, 20 °C)

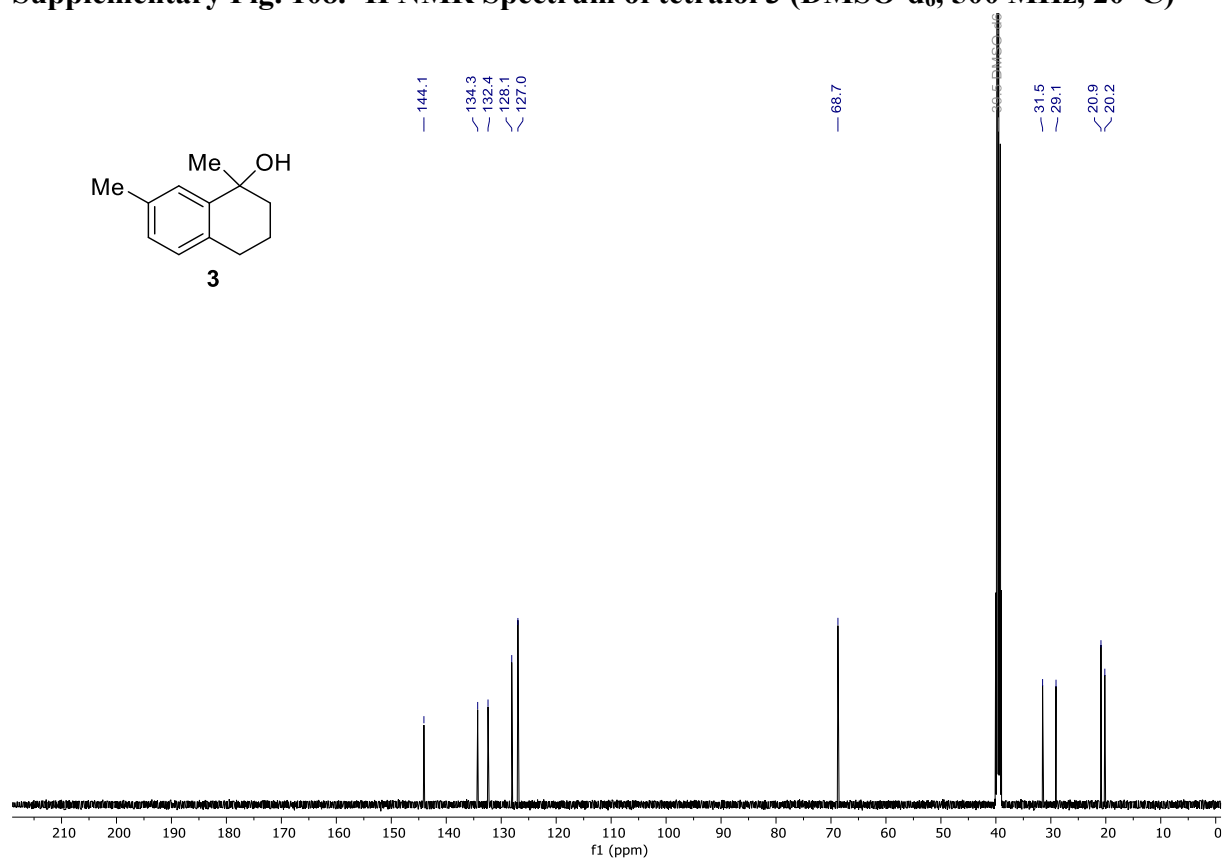

Supplementary Fig. 109. <sup>13</sup>C NMR Spectrum of tetralol 3 (DMSO-d<sub>6</sub>, 126 MHz, 20 °C)

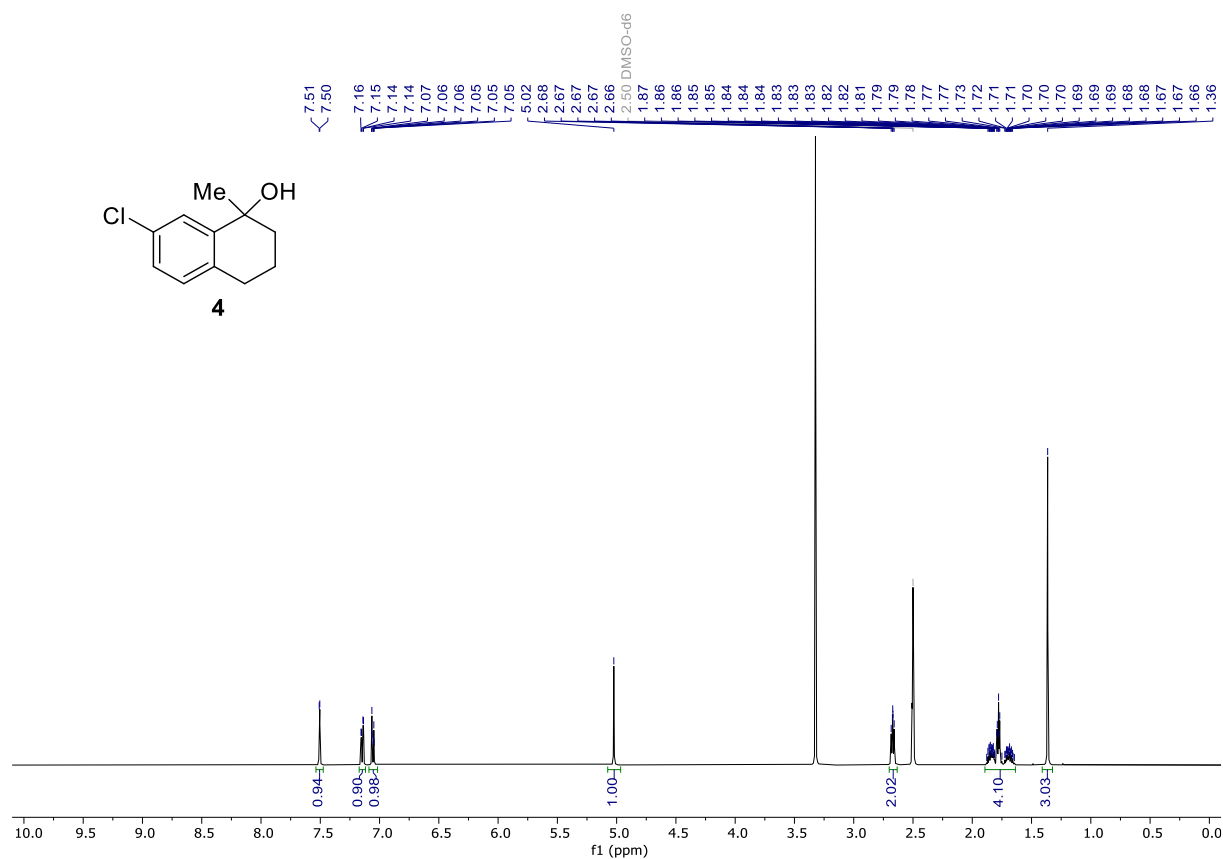

**Supplementary Fig. 110. <sup>1</sup>H NMR Spectrum of tetralol 4 (DMSO-d<sub>6</sub>, 500 MHz, 20 °C)**

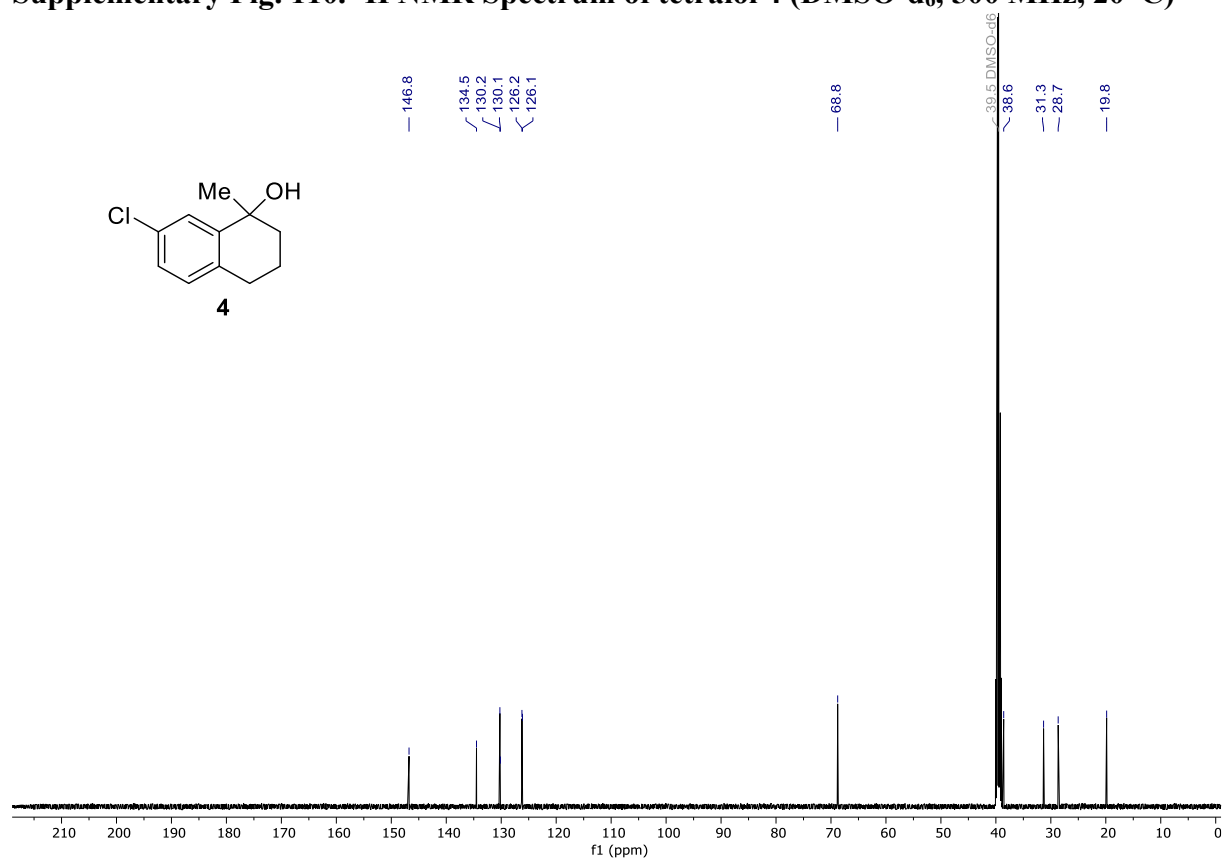

**Supplementary Fig. 111. <sup>13</sup>C NMR Spectrum of tetralol 4 (DMSO-d<sub>6</sub>, 126 MHz, 20 °C)**

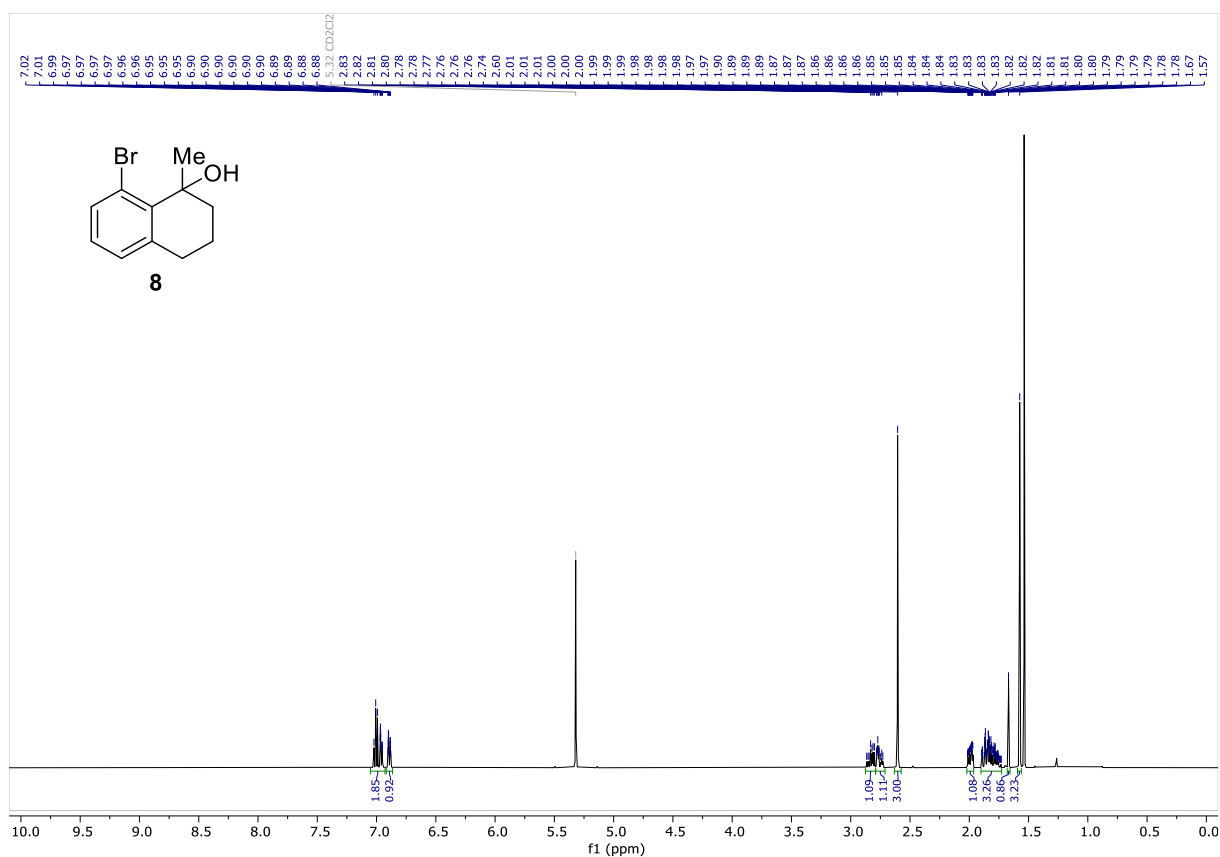

Supplementary Fig. 112. <sup>1</sup>H NMR Spectrum of tetralol **8** (CD<sub>2</sub>Cl<sub>2</sub>, 500 MHz, 20 °C)

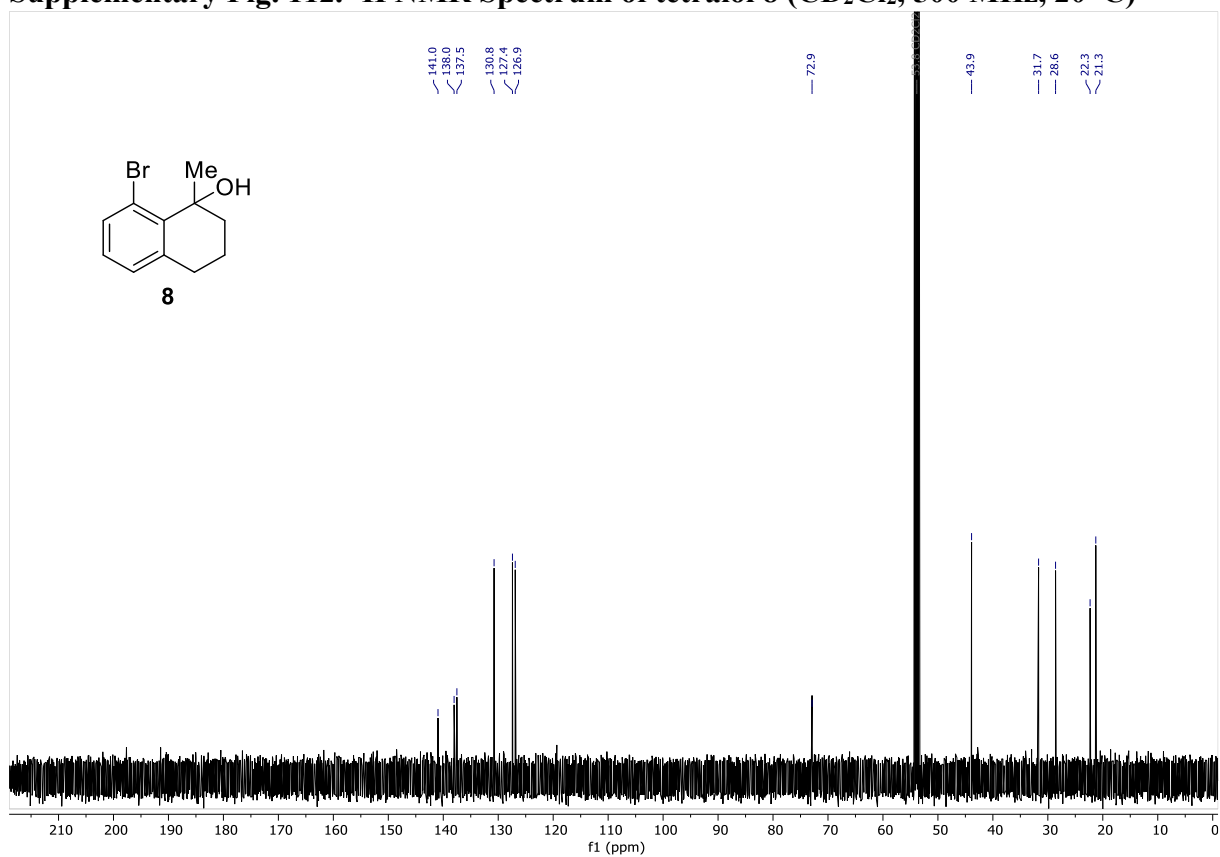

Supplementary Fig. 113. <sup>13</sup>C NMR Spectrum of tetralol **8** (CD<sub>2</sub>Cl<sub>2</sub>, 126 MHz, 20 °C)

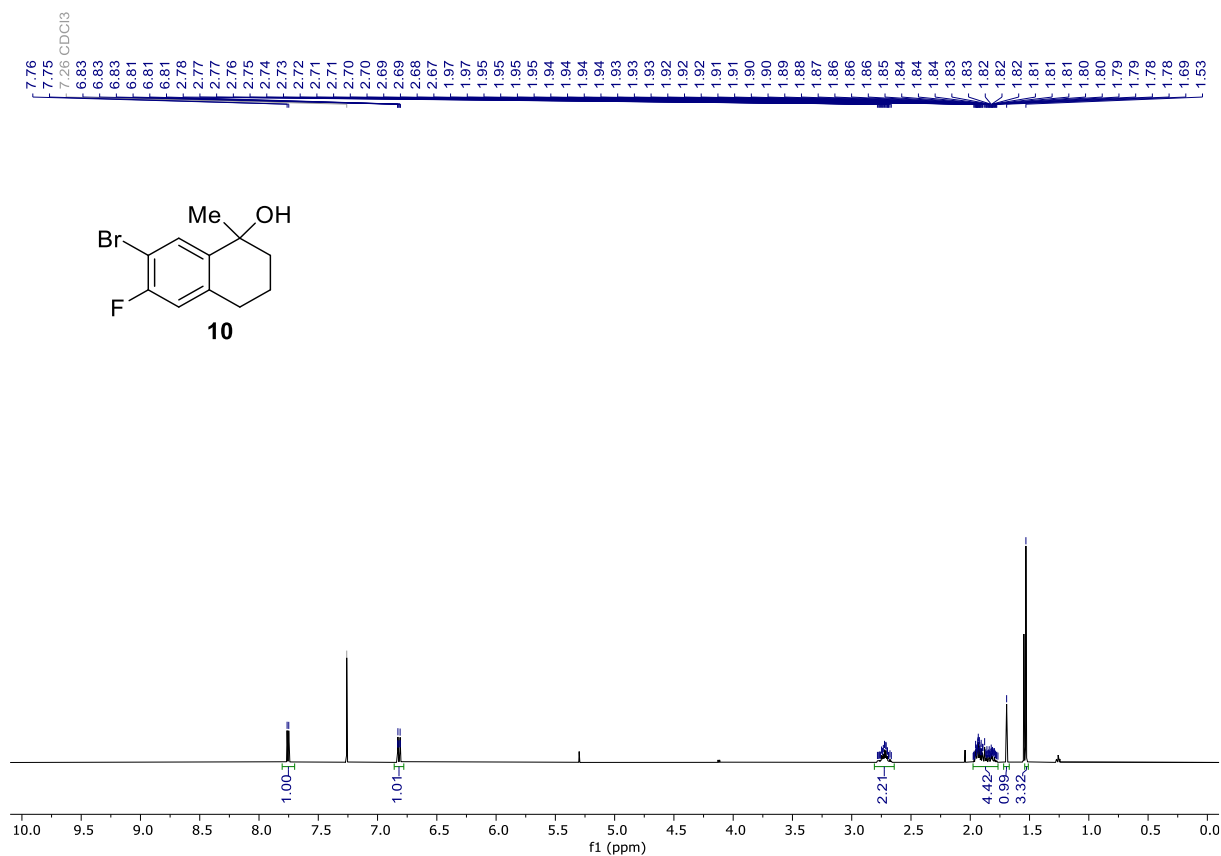

Supplementary Fig. 114. <sup>1</sup>H NMR Spectrum of tetralol 10 (CDCl<sub>3</sub>, 500 MHz, 20 °C)

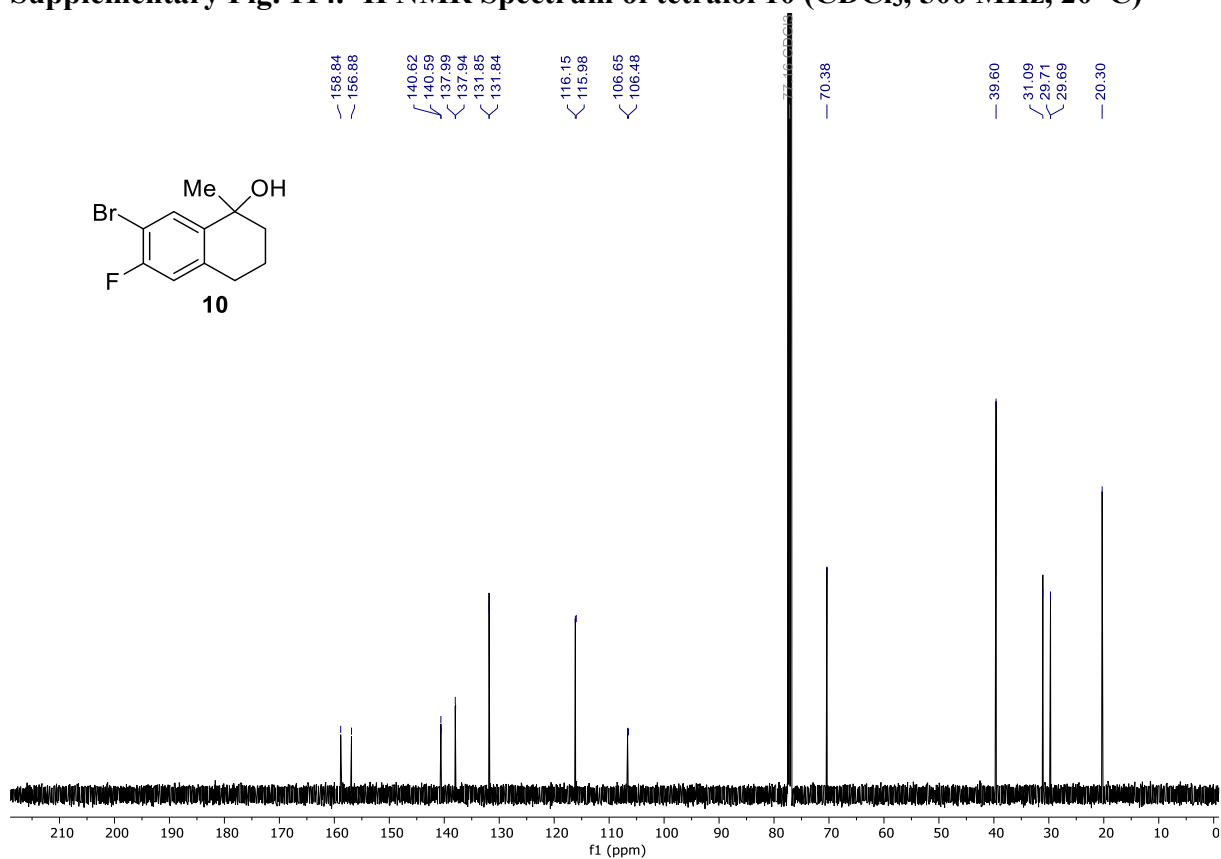

Supplementary Fig. 115. <sup>13</sup>C NMR Spectrum of tetralol 10 (CDCl<sub>3</sub>, 126 MHz, 20 °C)

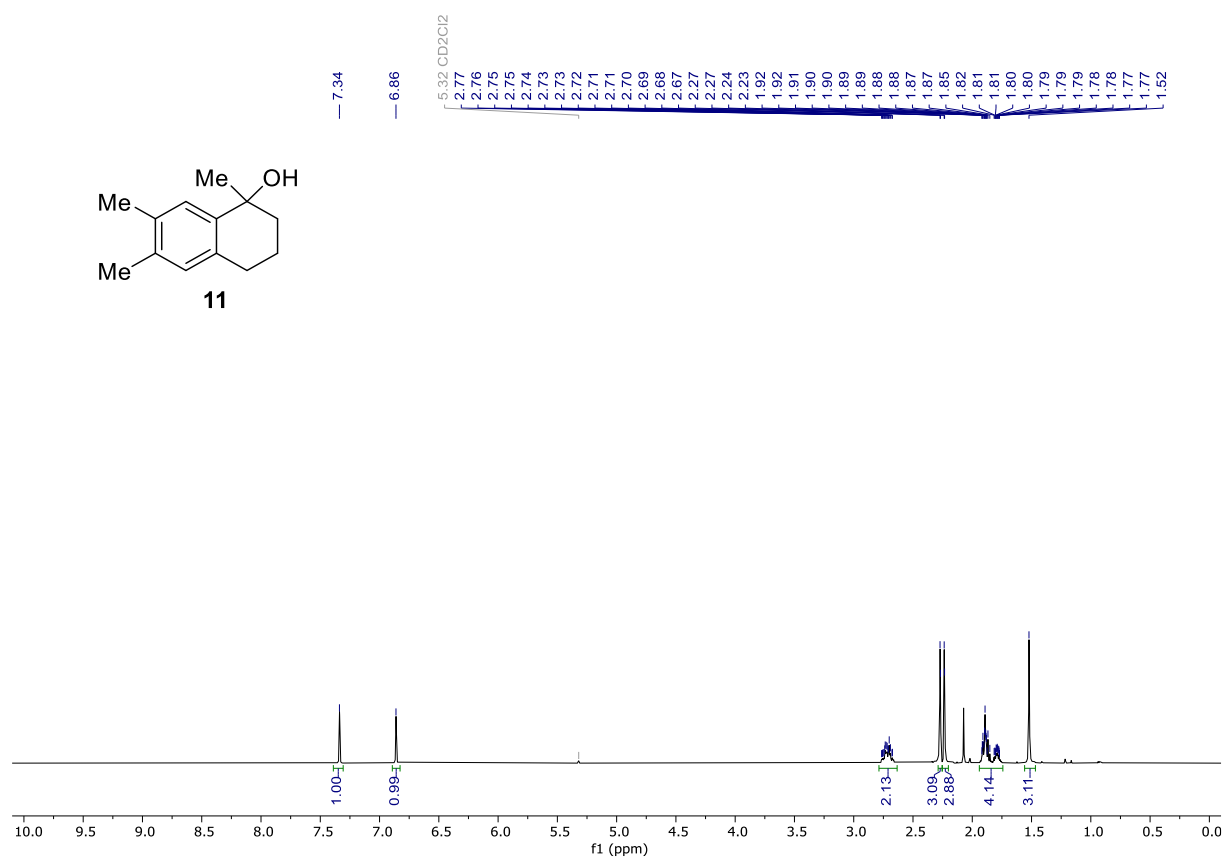

**Supplementary Fig. 116. <sup>1</sup>H NMR Spectrum of tetralol 11 (CD<sub>2</sub>Cl<sub>2</sub>, 600 MHz, 20 °C)**

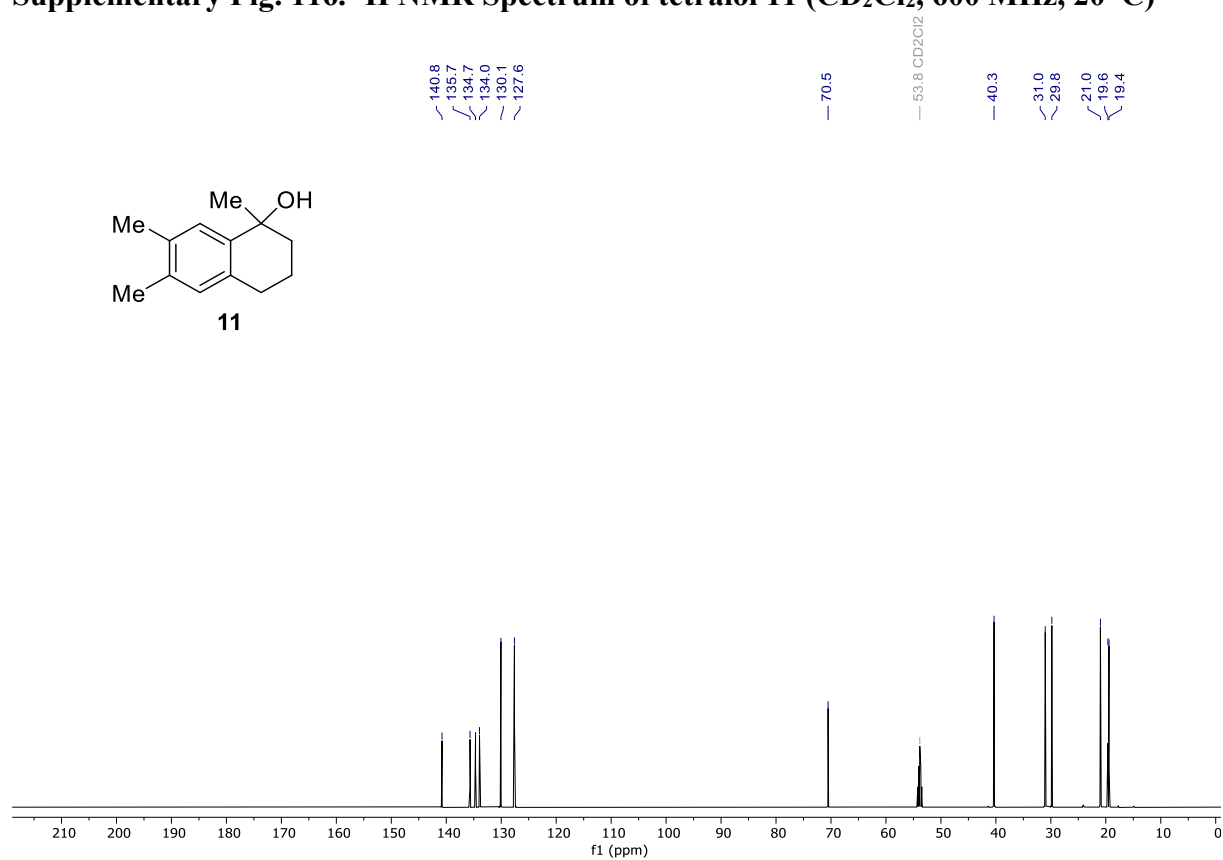

**Supplementary Fig. 117. <sup>13</sup>C NMR Spectrum of tetralol 11 (CD<sub>2</sub>Cl<sub>2</sub>, 151 MHz, 20 °C)**

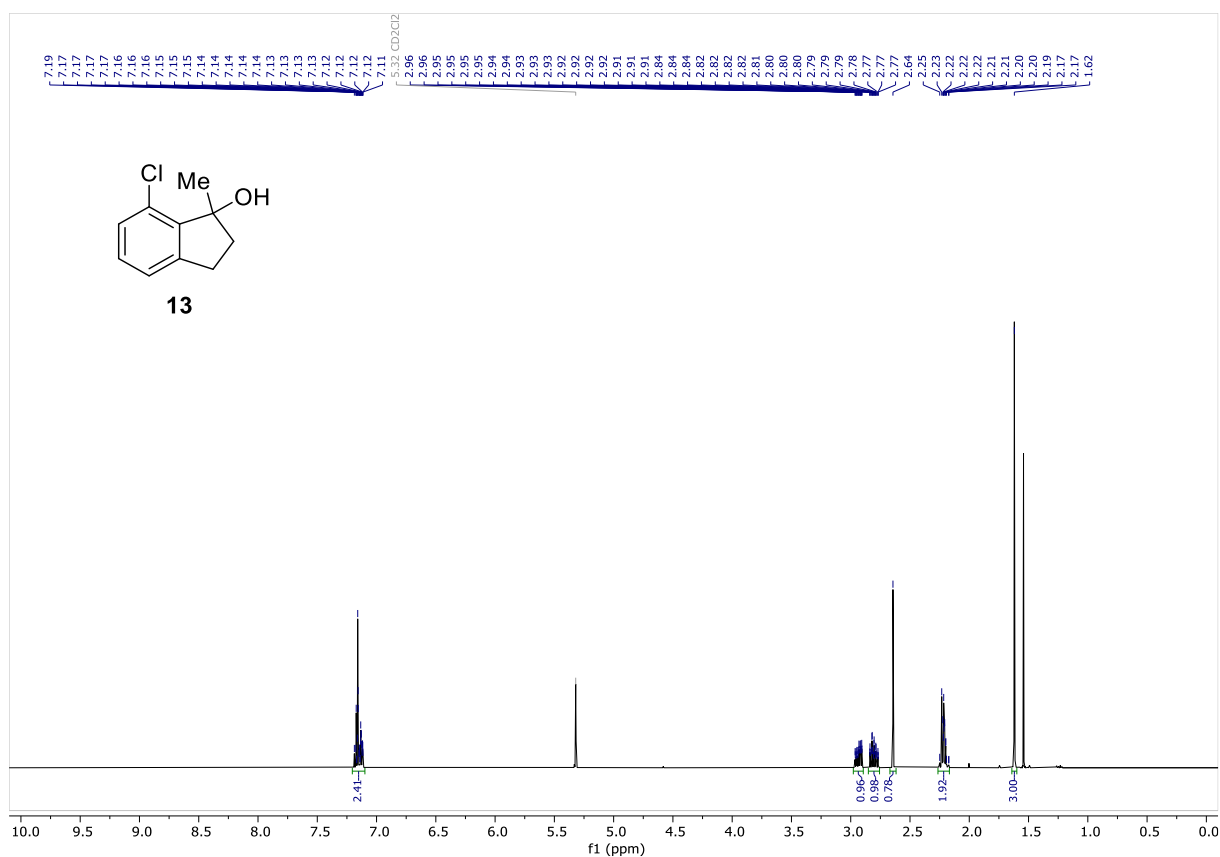

**Supplementary Fig. 118. <sup>1</sup>H NMR Spectrum of indanol 13 (CD<sub>2</sub>Cl<sub>2</sub>, 500 MHz, 20 °C)**

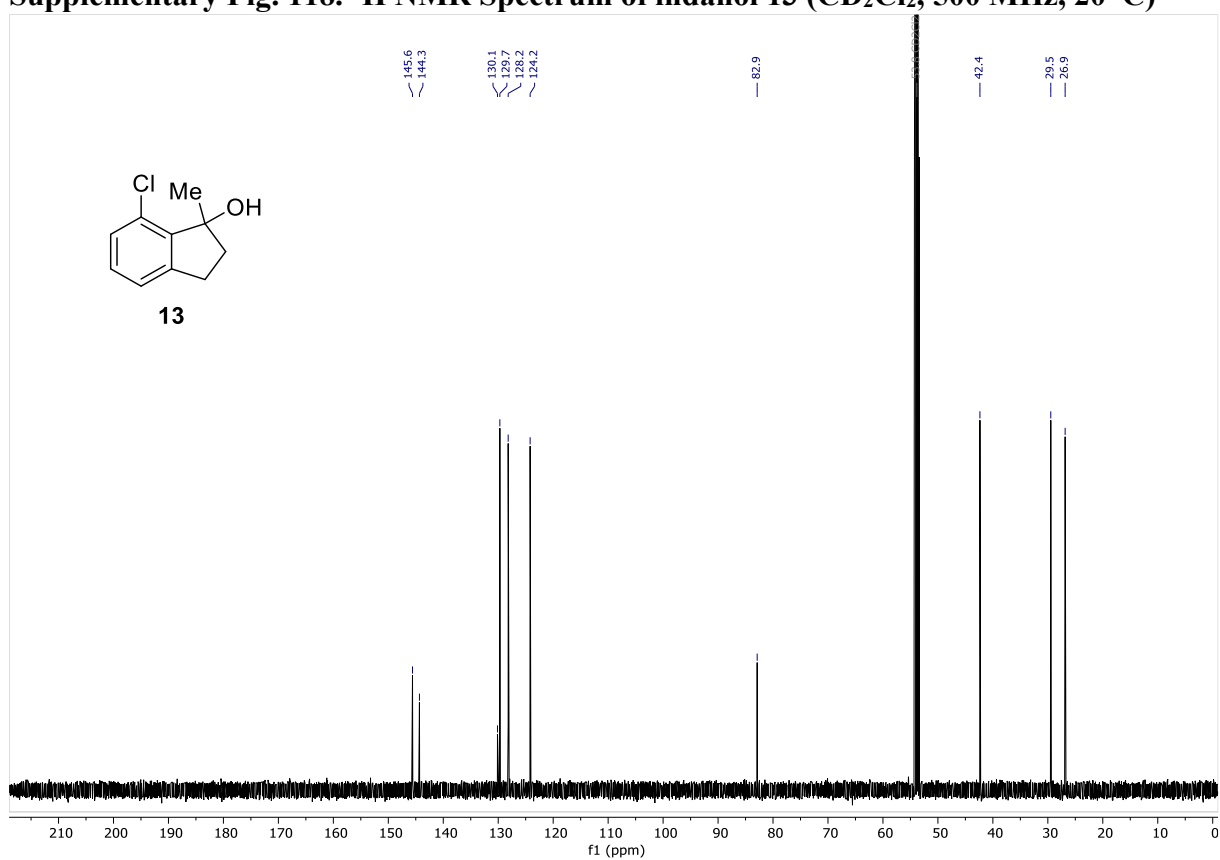

**Supplementary Fig. 119. <sup>13</sup>C NMR Spectrum of indanol 13 (CD<sub>2</sub>Cl<sub>2</sub>, 126 MHz, 20 °C)**

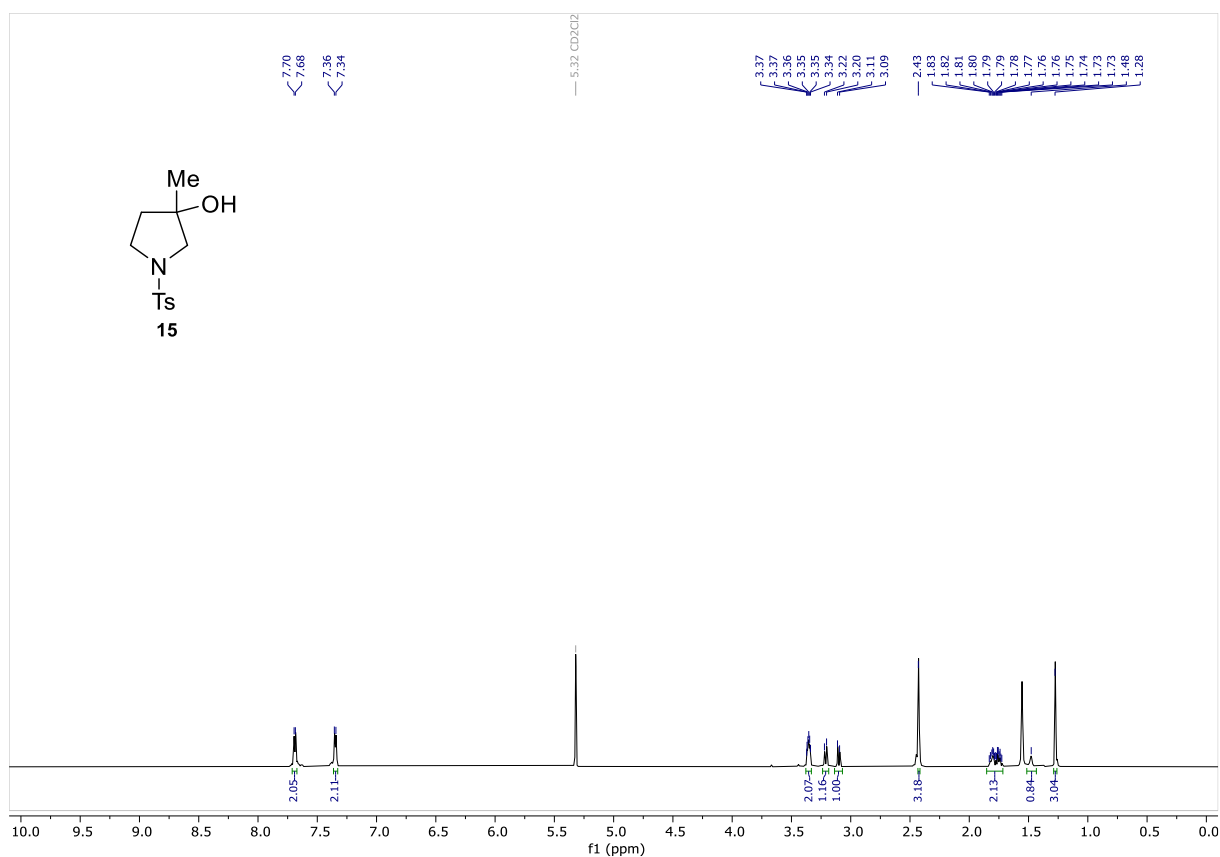

Supplementary Fig. 120. <sup>1</sup>H NMR Spectrum of pyrrolidinol 15 (CD<sub>2</sub>Cl<sub>2</sub>, 600 MHz, 20 °C)

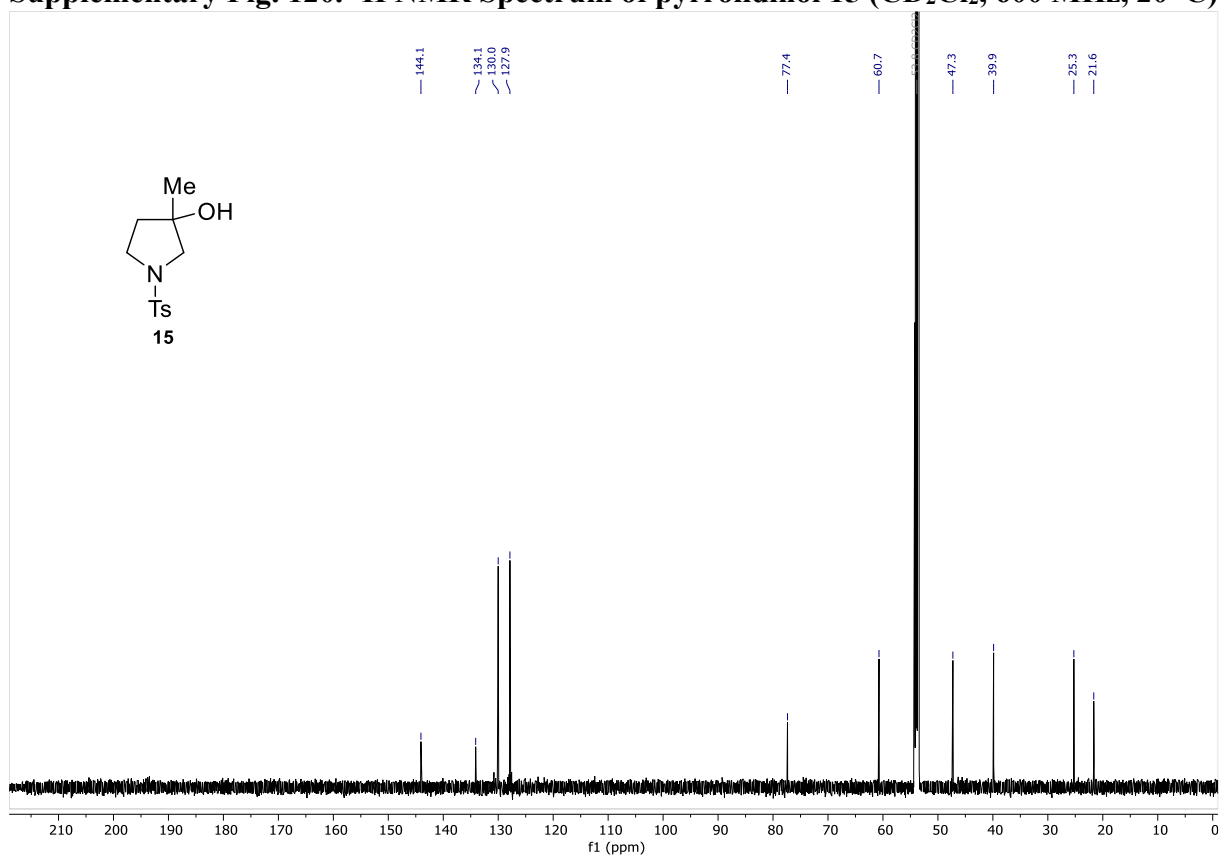

Supplementary Fig. 121. <sup>13</sup>C NMR Spectrum of pyrrolidinol 15 (CD<sub>2</sub>Cl<sub>2</sub>, 151 MHz, 20 °C)



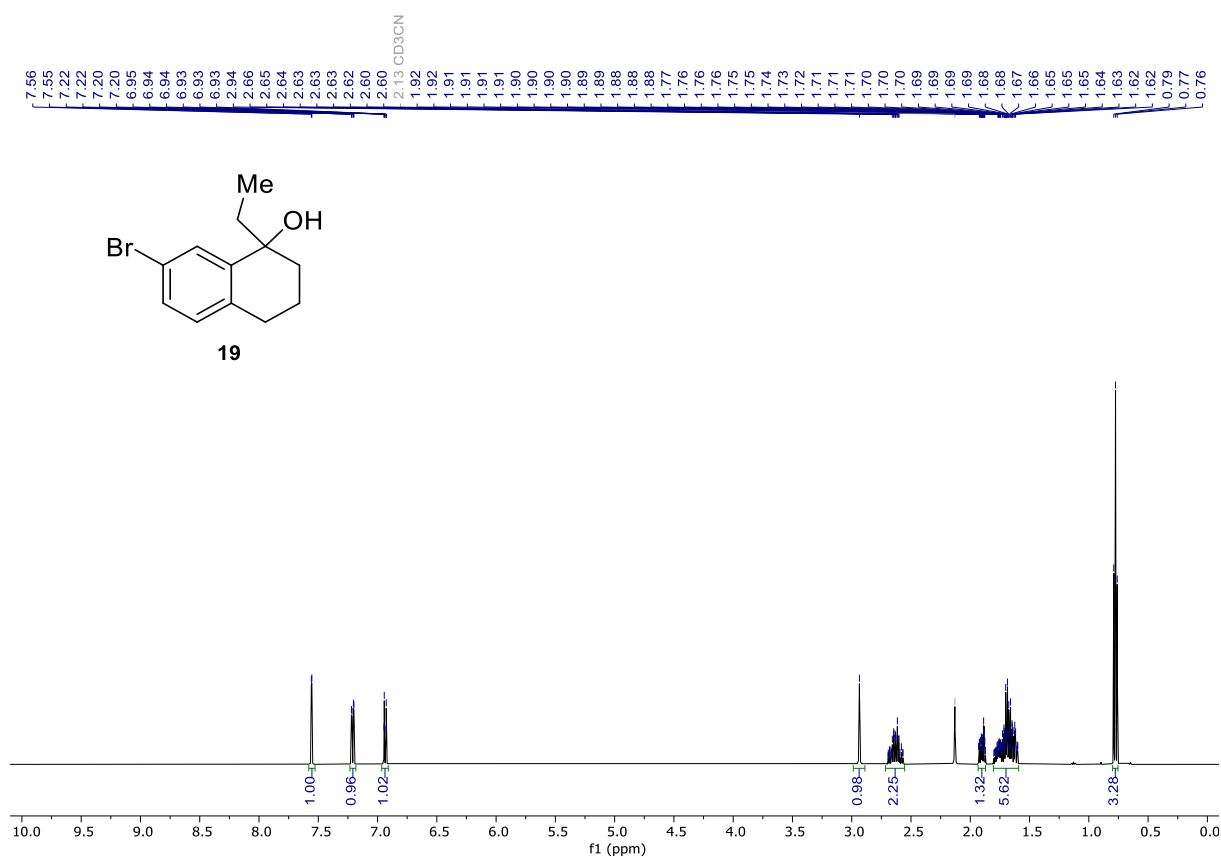

Supplementary Fig. 122. <sup>1</sup>H NMR Spectrum of tetralol 19 (CD<sub>3</sub>CN, 500 MHz, 20 °C)

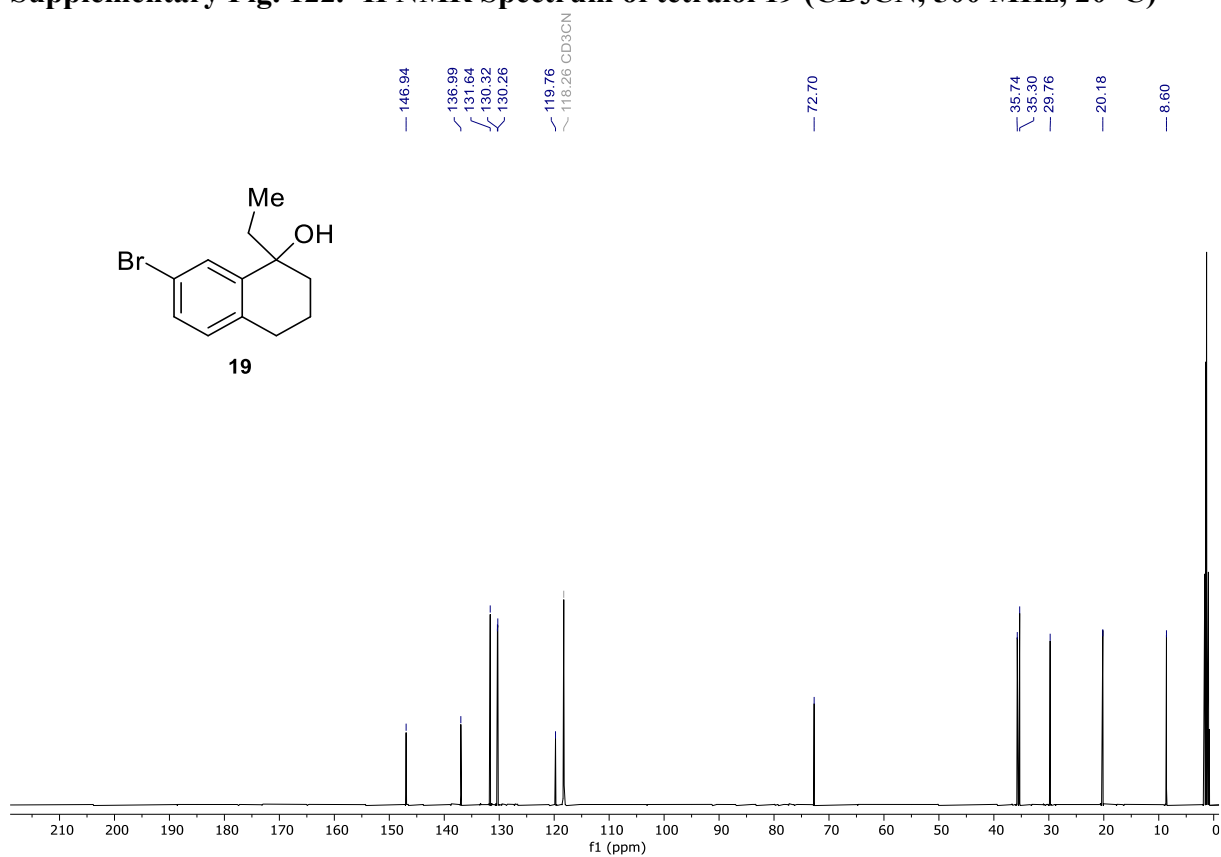

Supplementary Fig. 123. <sup>13</sup>C NMR Spectrum of tetralol 19 (CD<sub>3</sub>CN, 126 MHz, 20 °C)

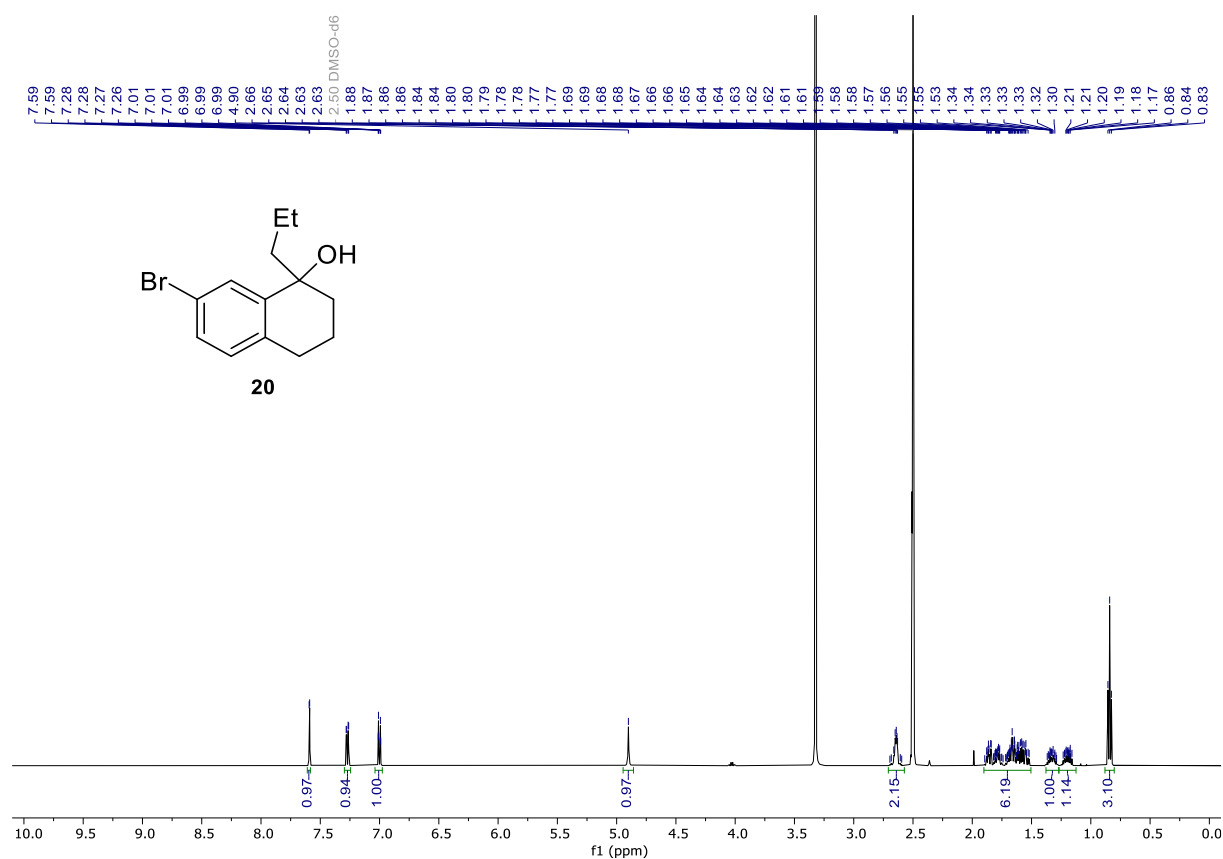

Supplementary Fig. 124. <sup>1</sup>H NMR Spectrum of tetralol 20 (DMSO-d<sub>6</sub>, 500 MHz, 20 °C)

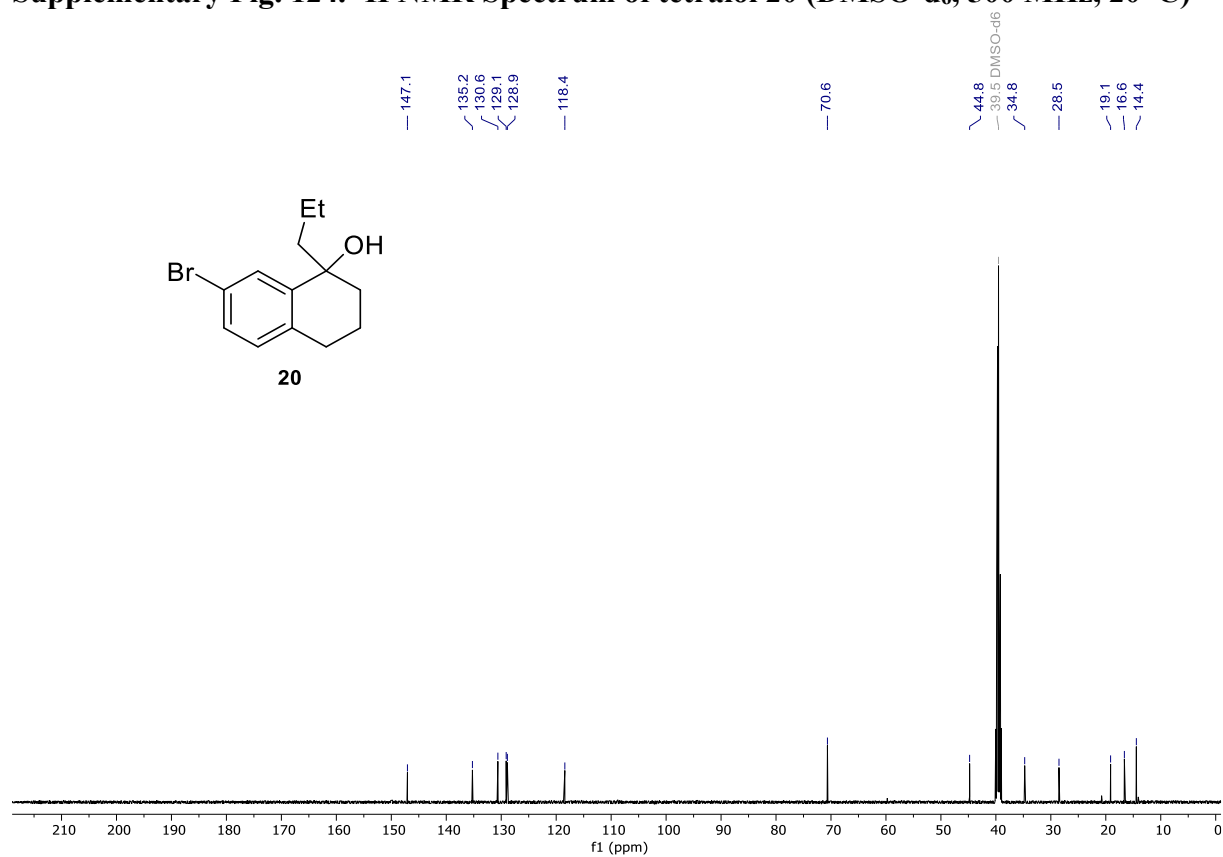

Supplementary Fig. 125. <sup>13</sup>C NMR Spectrum of tetralol 20 (DMSO-d<sub>6</sub>, 126 MHz, 20 °C)

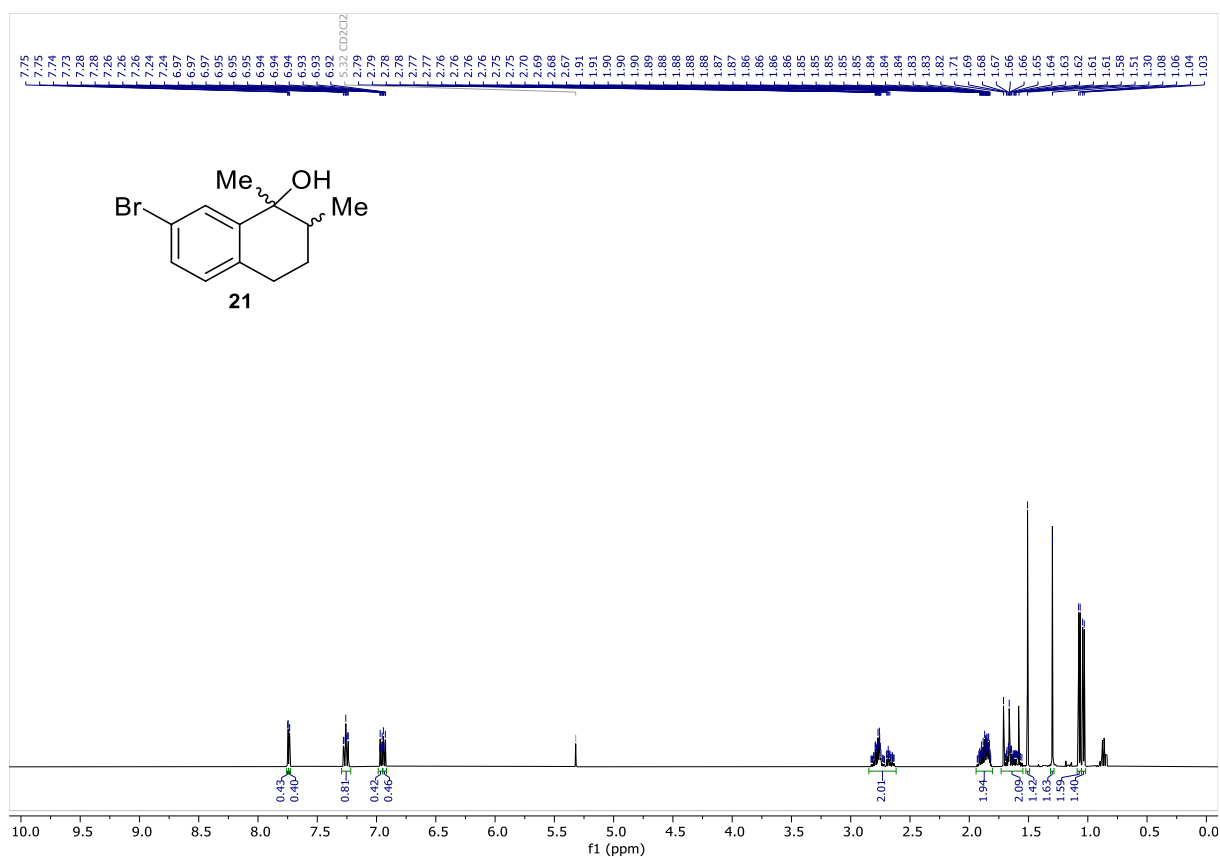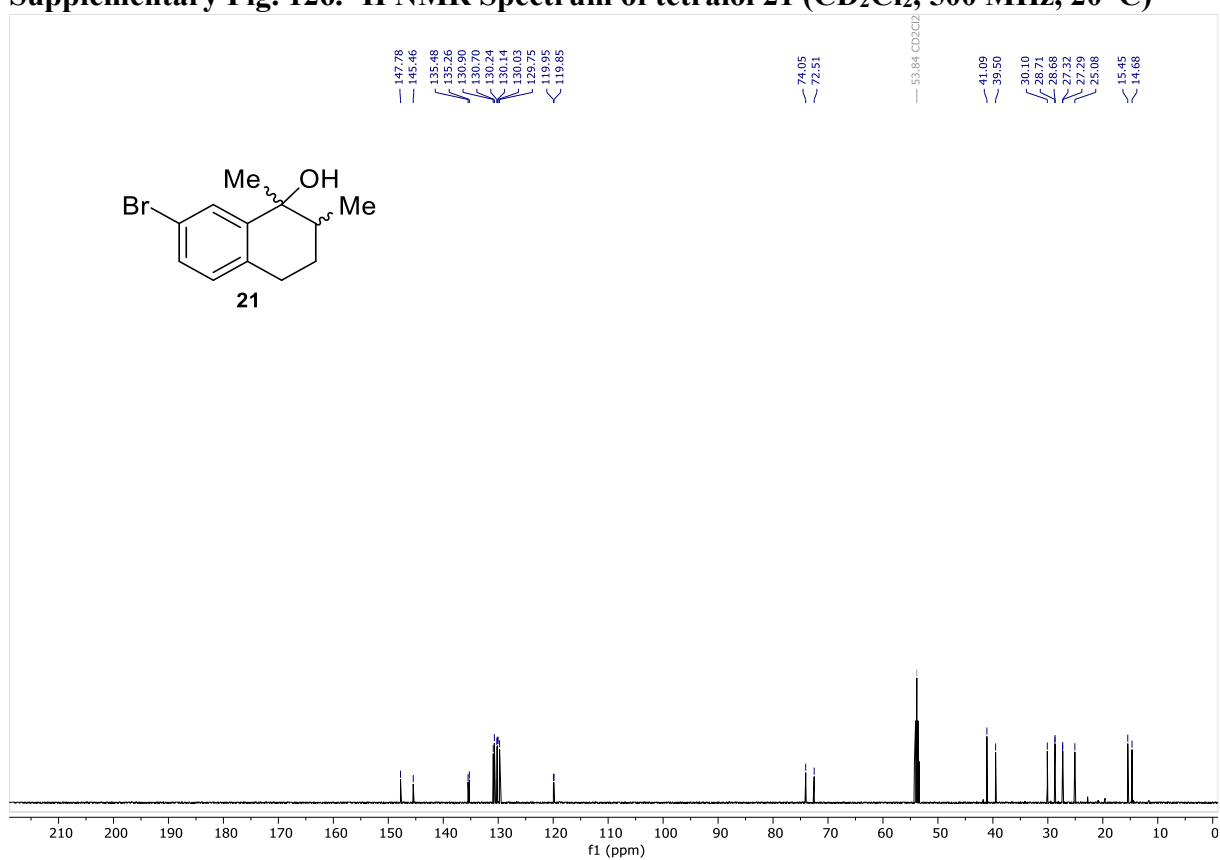

## 9. References

- 1 Wan, Z.-K. *et al.* Synthesis of potent and orally efficacious 11 $\beta$ -hydroxysteroid dehydrogenase type 1 inhibitor HSD-016. *J. Org. Chem.* **76**, 7048–7055 (2011).
- 2 Vanhessche, K. P. M. & Sharpless, K. B. Ligand-dependent reversal of facial selectivity in the asymmetric dihydroxylation. *J. Org. Chem.* **61**, 7978–7979 (1996).
- 3 Lin, Q., Tong, W., Shu, X.-Z. & Chen, Y. Ti-catalyzed dehydroxylation of tertiary alcohols. *Org. Lett.* **24**, 8459–8464 (2022).
- 4 Popov, A. G. *et al.* Copper-catalyzed three-component 1,5-carboamination of vinylcyclopropanes. *Org. Lett.* **26**, 4621–4625 (2024).
- 5 Liu, W. D., Gao, J., Mo, J. N., Zhou, Y. & Zhao, J. Cooperative NHC and photoredox catalyzed radical aminoacylation of alkenes to tetrahydropyridazines. *Chemistry* **30**, e202402288 (2024).
- 6 Ye, T., Li, Y., Ma, Y., Tan, S. & Li, F. Aerobic benzylic C(sp<sup>3</sup>)–H bond oxygenations catalyzed by NBS under visible light irradiation. *J. Org. Chem.* **89**, 534–540 (2024).
- 7 Bosnidou, A. E. *et al.* Tandem InCl<sub>3</sub>-promoted hydroperoxide rearrangements and nucleophilic additions: A straightforward entry to benzoxacycles. *J. Org. Chem.* **88**, 9277–9282 (2023).
- 8 Keith, John M., Larrow, Jay F. & Jacobsen, Eric N. Practical considerations in kinetic resolution reactions. *Adv. Synth. Catal.* **343**, 5–26 (2001).
- 9 Li, H. Y., Darwish, K. & Poulos, T. L. Characterization of recombinant *Bacillus megaterium* cytochrome P-450 BM-3 and its two functional domains. *J. Biol. Chem.* **266**, 11909–11914 (1991).
- 10 Coelho, P. S., Brustad, E. M., Kannan, A. & Arnold, F. H. Olefin cyclopropanation via carbene transfer catalyzed by engineered cytochrome P450 enzymes. *Science* **339**, 307–310 (2013).
- 11 McIntosh, J. A. *et al.* Enantioselective intramolecular C-H amination catalyzed by engineered cytochrome P450 enzymes in vitro and in vivo. *Angew. Chem. Int. Ed.* **52**, 9309–9312 (2013).
- 12 Tanaka, S., Yoshii, Y. & Hattori, T. Lewis acid-mediated friedel-crafts-type formylation of alkenes with dichloromethyl methyl ether in the presence of pyridines. *J. Org. Chem.* **89**, 3546–3551 (2024).
- 13 Trenner, J., Depken, C., Weber, T. & Breder, A. Direct oxidative allylic and vinylic amination of alkenes through selenium catalysis. *Angew. Chem. Int. Ed. Engl.* **52**, 8952–8956 (2013).

- 14 Zhao, Z., To, A. J. & Murphy, G. K. Difluorinative ring expansions of benzo-fused carbocycles and heterocycles are achieved with p-(difluoriodo)toluene. *Chem. Commun.* **55**, 14821–14824 (2019).
- 15 Ballav, T., Barman, S. & Ganesh, V. Aryne alder-ene reaction enables arylation of conformationally locked styrenes. *Org. Lett.* **27**, 4107–4111 (2025).
- 16 Momiyama, N., Okamoto, H., Kikuchi, J., Korenaga, T. & Terada, M. Perfluorinated aryls in the design of chiral brønsted acid catalysts: Catalysis of enantioselective [4 + 2] cycloadditions and ene reactions of imines with alkenes by chiral mono-phosphoric acids with perfluoroaryls. *ACS Catal.* **6**, 1198–1204 (2016).
- 17 Kikuchi, J., Aramaki, H., Okamoto, H. & Terada, M. F(10)BINOL-derived chiral phosphoric acid-catalyzed enantioselective carbonyl-ene reaction: theoretical elucidation of stereochemical outcomes. *Chem. Sci.* **10**, 1426–1433 (2019).
- 18 Vom Stein, T. *et al.* Electrophilic fluorophosphonium cations in frustrated lewis pair hydrogen activation and catalytic hydrogenation of olefins. *Angew. Chem., Int. Ed. Engl.* **54**, 10178–10182 (2015).
- 19 Vallapurackal, J. *et al.* Biocatalytic, asymmetric radical hydrogenation of unactivated alkenes. *Science* **390**, 1050–1056 (2025).
- 20 Crotti, P. *et al.* Aromatic substituent effect on the stereoselectivity of the condensed- and gas-phase acid-induced methanolysis in 2-aryloxiranes derived from 3,4-dihydronaphthalene and trans-1,2,3,4,4a,10a-hexahydrophenanthrene bearing a tertiary benzylic oxirane nucleophilic centre. *Tetrahedron* **53**, 5515–5536 (1997).
- 21 Lou, S. J. *et al.* (Z)-selective isomerization of 1,1-disubstituted alkenes by scandium-catalyzed allylic C-H activation. *J. Am. Chem. Soc.* **146**, 26766–26776 (2024).
- 22 Zeng, G., Fu, Z., Yin, B. & Huang, L. Visible light-induced single-atom insertion of indenes via aerobic ring scission-condensation-rearomatization. *Chemistry* **31**, e202403828 (2025).
- 23 Krasovskiy, A., Kopp, F. & Knochel, P. Soluble lanthanide salts (LnCl<sub>3</sub>·2LiCl) for the improved addition of organomagnesium reagents to carbonyl compounds. *Angew. Chem. Int. Ed. Engl.* **45**, 497–500 (2006).
- 24 Kelley, B. T., Walters, J. C. & Wengryniuk, S. E. Access to diverse oxygen heterocycles via oxidative rearrangement of benzylic tertiary alcohols. *Org. Lett.* **18**, 1896–1899 (2016).
- 25 Frija, L. M. T. & Afonso, C. A. M. Amberlyst®-15: A reusable heterogeneous catalyst for the dehydration of tertiary alcohols. *Tetrahedron* **68**, 7414–7421 (2012).

- 26 Yamamoto, Y., Murayama, T., Jiang, J., Yasui, T. & Shibuya, M. The vinylogous Catellani reaction: a combined computational and experimental study. *Chem. Sci.* **9**, 1191–1199 (2018).
- 27 Guney, T., Wenderski, T. A., Boudreau, M. W. & Tan, D. S. Synthesis of benzannulated medium-ring lactams via a tandem oxidative dearomatization-ring expansion reaction. *Chemistry* **24**, 13150–13157 (2018).
- 28 Casimiro-Garcia, A. *et al.* Identification of cyanamide-based janus kinase 3 (JAK3) covalent inhibitors. *J. Med. Chem.* **61**, 10665–10699 (2018).
- 29 Dosa, P. I. & Fu, G. C. Catalytic asymmetric addition of  $\text{ZnPh}_2$  to ketones: Enantioselective formation of quaternary stereocenters. *J. Am. Chem. Soc.* **120**, 445–446 (1998).
